# Supplementary material for: Integrated Analysis of Gene Expression Profiles Associated with Response of Platinum/Paclitaxel-Based Treatment in Epithelial Ovarian Cancer
Source: PLoS One. 2012 Dec 27;7(12):e52745. doi: 10.1371/journal.pone.0052745 (PMC3531383; doi:10.1371/journal.pone.0052745)
Supplement: Table S1 — Gene list of the 349-gene signature. (XLSX) [file pone.0052745.s001.xlsx]

## Sheet: Table S1
Table S1. Gene list of the 349-gene signature
Gene Symbol	EntrezGene	Description
C6orf120	387263	Chromosome 6 open reading frame 120
BLMH	642	Bleomycin hydrolase
ACTR6	64431	ARP6 actin-related protein 6 homolog (yeast)
USP21	27005	Ubiquitin specific peptidase 21
NIT1	4817	Nitrilase 1
VPS72	6944	Vacuolar protein sorting 72 homolog (S. cerevisiae)
KIAA0859	51603	KIAA0859
GTF2H5	404672	General transcription factor IIH, polypeptide 5
PIGC	5279	Phosphatidylinositol glycan anchor biosynthesis, class C
C1orf25	81627	Chromosome 1 open reading frame 25
TBP	6908	TATA box binding protein
NCSTN	23385	Nicastrin
SF3B4	10262	Splicing factor 3b, subunit 4, 49kDa
SCAMP3	10067	Secretory carrier membrane protein 3
MTX1	4580	Metaxin 1
C1orf27	54953	Chromosome 1 open reading frame 27
RHOT1	55288	Ras homolog gene family, member T1
ZNF200	7752	Zinc finger protein 200
SCNM1	79005	sodium channel modifier 1
DDX23	9416	DEAD (Asp-Glu-Ala-Asp) box polypeptide 23
SSR2	6746	Signal sequence receptor, beta (translocon-associated protein beta)
ENSA	2029	Endosulfine alpha
PDCD2	5134	Programmed cell death 2
TIMM17B	10245	Translocase of inner mitochondrial membrane 17 homolog B (yeast)
NFS1	9054	NFS1 nitrogen fixation 1 homolog (S. cerevisiae)
GNPDA1	10007	Glucosamine-6-phosphate deaminase 1
NKIRAS2	28511	NFKB inhibitor interacting Ras-like 2
ENOPH1	58478	Enolase-phosphatase 1
TTC31	64427	Tetratricopeptide repeat domain 31
NUDT9	53343	Nudix (nucleoside diphosphate linked moiety X)-type motif 9
TIPRL	261726	TIP41, TOR signaling pathway regulator-like (S. cerevisiae)
SETDB1	9869	SET domain, bifurcated 1
MRPL9	65005	Mitochondrial ribosomal protein L9
TMEM5	10329	Transmembrane protein 5
PSMB1	5689	Proteasome (prosome, macropain) subunit, beta type, 1
TARS2	80222	Threonyl-tRNA synthetase 2, mitochondrial (putative)
SMARCE1	6605	SWI/SNF related, matrix associated, actin dependent regulator of chromatin, subfamily e, member 1
C1orf2	10712	Chromosome 1 open reading frame 2
CACYBP	27101	Calcyclin binding protein
PI4KB	5298	Phosphatidylinositol 4-kinase, catalytic, beta
SCYL3	57147	SCY1-like 3 (S. cerevisiae)
CDKN2AIP	55602	CDKN2A interacting protein
THSD1	55901	Thrombospondin, type I, domain containing 1
PERLD1	93210	Per1-like domain containing 1
LCMT2	9836	Leucine carboxyl methyltransferase 2
EFNA3	1944	Ephrin-A3
METTL4	64863	Methyltransferase like 4
SNX27	81609	Sorting nexin family member 27
C1orf107	27042	Chromosome 1 open reading frame 107
TMEM11	8834	Transmembrane protein 11
PSMB4	5692	Proteasome (prosome, macropain) subunit, beta type, 4
C4orf19	55286	Chromosome 4 open reading frame 19
CCT3	7203	Chaperonin containing TCP1, subunit 3 (gamma)
SNRPE	6635	Small nuclear ribonucleoprotein polypeptide E
BRF2	55290	BRF2, subunit of RNA polymerase III transcription initiation factor, BRF1-like
TMUB2	79089	Transmembrane and ubiquitin-like domain containing 2
PRKAB2	5565	Protein kinase, AMP-activated, beta 2 non-catalytic subunit
STX6	10228	Syntaxin 6
WDR42A	50717	WD repeat domain 42A
ANGEL2	90806	Angel homolog 2 (Drosophila)
CASP3	836	Caspase 3, apoptosis-related cysteine peptidase
FLJ10986	55277	Hypothetical protein FLJ10986
PHLPP	23239	PH domain and leucine rich repeat protein phosphatase
ZNF764	92595	Zinc finger protein 764
DEDD	9191	Death effector domain containing
ATPAF2	91647	ATP synthase mitochondrial F1 complex assembly factor 2
ALDH9A1	223	Aldehyde dehydrogenase 9 family, member A1
CCNT1	904	Cyclin T1
AHI1	54806	Abelson helper integration site 1
MAPK10	5602	Mitogen-activated protein kinase 10
DRG2	1819	Developmentally regulated GTP binding protein 2
AGGF1	55109	Angiogenic factor with G patch and FHA domains 1
SALL1	6299	Sal-like 1 (Drosophila)
CIAO1	9391	Cytosolic iron-sulfur protein assembly 1 homolog (S. cerevisiae)
ERBB2	2064	V-erb-b2 erythroblastic leukemia viral oncogene homolog 2, neuro/glioblastoma derived oncogene homolog (avian)
HN1L	90861	Hematological and neurological expressed 1-like
CHD1L	9557	Chromodomain helicase DNA binding protein 1-like
LIG3	3980	Ligase III, DNA, ATP-dependent
VAPB	9217	VAMP (vesicle-associated membrane protein)-associated protein B and C
SMYD5	10322	SMYD family member 5
AKR7A3	22977	Aldo-keto reductase family 7, member A3 (aflatoxin aldehyde reductase)
C1orf77	26097	Chromosome 1 open reading frame 77
C7orf26	79034	Chromosome 7 open reading frame 26
ARHGEF9	23229	Cdc42 guanine nucleotide exchange factor (GEF) 9
TMEM53	79639	Transmembrane protein 53
RPAP1	26015	RNA polymerase II associated protein 1
SLC35A2	7355	Solute carrier family 35 (UDP-galactose transporter), member A2
CARTPT	9607	CART prepropeptide
TRAFD1	10906	TRAF-type zinc finger domain containing 1
SIRT3	23410	Sirtuin (silent mating type information regulation 2 homolog) 3 (S. cerevisiae)
H3F3A	3020	H3 histone, family 3A
BIN3	55909	Bridging integrator 3
C1orf35	79169	Chromosome 1 open reading frame 35
ATP6V0A1	535	ATPase, H+ transporting, lysosomal V0 subunit a1
C16orf59	80178	Chromosome 16 open reading frame 59
BCL9	607	B-cell CLL/lymphoma 9
UBE2Q1	55585	Ubiquitin-conjugating enzyme E2Q (putative) 1
PAFAH2	5051	Platelet-activating factor acetylhydrolase 2, 40kDa
MAPK7	5598	Mitogen-activated protein kinase 7
C1orf56	54964	Chromosome 1 open reading frame 56
WBSCR16	81554	Williams-Beuren syndrome chromosome region 16
MAPK3	5595	Mitogen-activated protein kinase 3
ALX1	8092	ALX homeobox 1
GPATCH3	63906	G patch domain containing 3
ADH1C	126	Alcohol dehydrogenase 1C (class I), gamma polypeptide
NSL1	25936	NSL1, MIND kinetochore complex component, homolog (S. cerevisiae)
C1orf66	51093	Chromosome 1 open reading frame 66
MRPL24	79590	Mitochondrial ribosomal protein L24
NAGLU	4669	N-acetylglucosaminidase, alpha- (Sanfilippo disease IIIB)
GFOD2	81577	Glucose-fructose oxidoreductase domain containing 2
NEK1	4750	NIMA (never in mitosis gene a)-related kinase 1
RPL19	6143	Ribosomal protein L19
NLE1	54475	Notchless homolog 1 (Drosophila)
CCBL1	883	Cysteine conjugate-beta lyase; cytoplasmic (glutamine transaminase K, kyneurenine aminotransferase)
RAMP2	10266	Receptor (G protein-coupled) activity modifying protein 2
TADA2L	6871	Transcriptional adaptor 2 (ADA2 homolog, yeast)-like
SRP14	6727	Signal recognition particle 14kDa (homologous Alu RNA binding protein)
NUBP2	10101	Nucleotide binding protein 2 (MinD homolog, E. coli)
RPUSD2	27079	RNA pseudouridylate synthase domain containing 2
SYF2	25949	SYF2 homolog, RNA splicing factor (S. cerevisiae)
RTF1	23168	Rtf1, Paf1/RNA polymerase II complex component, homolog (S. cerevisiae)
CCDC121	79635	Coiled-coil domain containing 121
LRRK1	79705	Leucine-rich repeat kinase 1
ZFP37	7539	Zinc finger protein 37 homolog (mouse)
USP22	23326	Ubiquitin specific peptidase 22
PSMD4	5710	Proteasome (prosome, macropain) 26S subunit, non-ATPase, 4
LOC201229	201229	Hypothetical protein LOC201229
EPN2	22905	Epsin 2
SYNGR1	9145	Synaptogyrin 1
ARHGEF11	9826	Rho guanine nucleotide exchange factor (GEF) 11
HBP1	26959	HMG-box transcription factor 1
LDLRAP1	26119	Low density lipoprotein receptor adaptor protein 1
MAGEA5	4104	Melanoma antigen family A, 5
HDAC6	10013	Histone deacetylase 6
RABEP2	79874	Rabaptin, RAB GTPase binding effector protein 2
NOL3	8996	Nucleolar protein 3 (apoptosis repressor with CARD domain)
HHAT	55733	Hedgehog acyltransferase
ABLIM3	22885	Actin binding LIM protein family, member 3
RET	5979	Ret proto-oncogene
WDR59	79726	WD repeat domain 59
ZNF434	54925	Zinc finger protein 434
ARNT	405	Aryl hydrocarbon receptor nuclear translocator
CXXC4	80319	CXXC finger 4
TDRKH	11022	Tudor and KH domain containing
EZH1	2145	Enhancer of zeste homolog 1 (Drosophila)
CCNF	899	Cyclin F
ACTR5	79913	ARP5 actin-related protein 5 homolog (yeast)
GGA2	23062	Golgi associated, gamma adaptin ear containing, ARF binding protein 2
ETNK2	55224	Ethanolamine kinase 2
SEMA4F	10505	Sema domain, immunoglobulin domain (Ig), transmembrane domain (TM) and short cytoplasmic domain, (semaphorin) 4F
CNGA1	1259	Cyclic nucleotide gated channel alpha 1
SMARCD1	6602	SWI/SNF related, matrix associated, actin dependent regulator of chromatin, subfamily d, member 1
SLC12A6	9990	Solute carrier family 12 (potassium/chloride transporters), member 6
SH2B1	25970	SH2B adaptor protein 1
ELAC2	60528	ElaC homolog 2 (E. coli)
PLA2G6	8398	Phospholipase A2, group VI (cytosolic, calcium-independent)
MED9	55090	Mediator complex subunit 9
TNKS	8658	Tankyrase, TRF1-interacting ankyrin-related ADP-ribose polymerase
SLC17A6	57084	Solute carrier family 17 (sodium-dependent inorganic phosphate cotransporter), member 6
SMR3B	10879	Submaxillary gland androgen regulated protein 3 homolog B (mouse)
LOC55565
HIST1H4G	8369	Histone cluster 1, H4g
KLHL25	64410	Kelch-like 25 (Drosophila)
PROL1	58503	Proline rich, lacrimal 1
ATP6V1G2	534	ATPase, H+ transporting, lysosomal 13kDa, V1 subunit G2
MBL2	4153	Mannose-binding lectin (protein C) 2, soluble (opsonic defect)
EPM2A	7957	Epilepsy, progressive myoclonus type 2A, Lafora disease (laforin)
ZNF174	7727	Zinc finger protein 174
RBM19	9904	RNA binding motif protein 19
ZNF668	79759	Zinc finger protein 668
NUDT13	25961	Nudix (nucleoside diphosphate linked moiety X)-type motif 13
MAGEA12	4111	Melanoma antigen family A, 12
FBXL11	22992	F-box and leucine-rich repeat protein 11
PTHR1	5745	Parathyroid hormone receptor 1
ZNF287	57336	Zinc finger protein 287
HSD17B2	3294	Hydroxysteroid (17-beta) dehydrogenase 2
SSX2	6757	Synovial sarcoma, X breakpoint 2
GPR25	2848	G protein-coupled receptor 25
CEP250	11190	Centrosomal protein 250kDa
SOX14	8403	SRY (sex determining region Y)-box 14
SLC8A2	6543	Solute carrier family 8 (sodium-calcium exchanger), member 2
C1orf129	80133	Chromosome 1 open reading frame 129
DISC1	27185	Disrupted in schizophrenia 1
TMEM181	57583	Transmembrane protein 181
CLCN7	1186	Chloride channel 7
MYOG	4656	Myogenin (myogenic factor 4)
NF1	4763	Neurofibromin 1 (neurofibromatosis, von Recklinghausen disease, Watson disease)
RNASEL	6041	Ribonuclease L (2',5'-oligoisoadenylate synthetase-dependent)
ADAM19	8728	ADAM metallopeptidase domain 19 (meltrin beta)
TNS4	84951	Tensin 4
PSD	5662	Pleckstrin and Sec7 domain containing
FLRT1	23769	Fibronectin leucine rich transmembrane protein 1
UBE2I	7329	Ubiquitin-conjugating enzyme E2I (UBC9 homolog, yeast)
GFI1B	8328	Growth factor independent 1B transcription repressor
B3GNT4	79369	UDP-GlcNAc:betaGal beta-1,3-N-acetylglucosaminyltransferase 4
CTAG2	30848	Cancer/testis antigen 2
UTP15	84135	UTP15, U3 small nucleolar ribonucleoprotein, homolog (S. cerevisiae)
UBE2NL	389898	Ubiquitin-conjugating enzyme E2N-like
NLRP1	22861	NLR family, pyrin domain containing 1
ARHGAP6	395	Rho GTPase activating protein 6
OMP	4975	Olfactory marker protein
CD7	924	CD7 molecule
OR7A5	26659	Olfactory receptor, family 7, subfamily A, member 5
MPZ	4359	Myelin protein zero (Charcot-Marie-Tooth neuropathy 1B)
SLC17A7	57030	Solute carrier family 17 (sodium-dependent inorganic phosphate cotransporter), member 7
CAMK2B	816	Calcium/calmodulin-dependent protein kinase (CaM kinase) II beta
CPA2	1358	Carboxypeptidase A2 (pancreatic)
PSCD4	27128	Pleckstrin homology, Sec7 and coiled-coil domains 4
HMHB1	57824	Histocompatibility (minor) HB-1
PYGM	5837	Phosphorylase, glycogen; muscle (McArdle syndrome, glycogen storage disease type V)
TBX21	30009	T-box 21
EFCBP2	54550	EF-hand calcium binding protein 2
GPR85	54329	G protein-coupled receptor 85
CEACAM7	1087	Carcinoembryonic antigen-related cell adhesion molecule 7
ACOXL	55289	Acyl-Coenzyme A oxidase-like
SERF2	10169	Small EDRK-rich factor 2
MVK	4598	Mevalonate kinase (mevalonic aciduria)
C22orf26	55267	Chromosome 22 open reading frame 26
SPRR3	6707	Small proline-rich protein 3
CLDN8	9073	Claudin 8
SLC10A1	6554	Solute carrier family 10 (sodium/bile acid cotransporter family), member 1
APOH	350	Apolipoprotein H (beta-2-glycoprotein I)
IQSEC3	440073	IQ motif and Sec7 domain 3
CENTD2	116985	Centaurin, delta 2
PCDHA10	56134	protocadherin alpha 13; protocadherin alpha 10; protocadherin alpha subfamily C, 1; protocadherin alpha subfamily C, 2
CPA3	1359	Carboxypeptidase A3 (mast cell)
CARD10	29775	Caspase recruitment domain family, member 10
GPA33	10223	Glycoprotein A33 (transmembrane)
N4BP3	23138	Nedd4 binding protein 3
DKK1	22943	Dickkopf homolog 1 (Xenopus laevis)
PLA2G2E	30814	Phospholipase A2, group IIE
KIF17	57576	Kinesin family member 17
CCDC144A	284047	coiled-coil domain containing 144B; coiled-coil domain containing 144A; coiled-coil domain containing 144C
FAM120C	54954	Family with sequence similarity 120C
IGSF9B	22997	Immunoglobulin superfamily, member 9B
KLRC3	3823	Killer cell lectin-like receptor subfamily C, member 3
CPN1	1369	Carboxypeptidase N, polypeptide 1
GYPB	2994	Glycophorin B (MNS blood group)
SYNPO2L	79933	Synaptopodin 2-like
PLA2G4B	8681	Phospholipase A2, group IVB (cytosolic)
XYLB	9942	Xylulokinase homolog (H. influenzae)
PAPPA	5069	Pregnancy-associated plasma protein A, pappalysin 1
PADI3	51702	Peptidyl arginine deiminase, type III
CA10	56934	Carbonic anhydrase X
NEUROG3	50674	Neurogenin 3
FOXE3	2301	Forkhead box E3
BMP2	650	Bone morphogenetic protein 2
NTSR1	4923	Neurotensin receptor 1 (high affinity)
GPR77	27202	G protein-coupled receptor 77
SLC6A4	6532	Solute carrier family 6 (neurotransmitter transporter, serotonin), member 4
PCDHA2	56146	protocadherin alpha 2
CLDN17	26285	Claudin 17
HIST1H2AK	8330	Histone cluster 1, H2ak
LRRC19	64922	Leucine rich repeat containing 19
PCNX	22990	Pecanex homolog (Drosophila)
OSBPL7	114881	Oxysterol binding protein-like 7
GABRB3	2562	Gamma-aminobutyric acid (GABA) A receptor, beta 3
F9	2158	Coagulation factor IX (plasma thromboplastic component, Christmas disease, hemophilia B)
RNF208	727800	Ring finger protein 208
CCL23	6368	Chemokine (C-C motif) ligand 23
NTRK3	4916	Neurotrophic tyrosine kinase, receptor, type 3
KCNA5	3741	Potassium voltage-gated channel, shaker-related subfamily, member 5
MAP3K9	4293	Mitogen-activated protein kinase kinase kinase 9
MAPKBP1	23005	Mitogen activated protein kinase binding protein 1
CCDC28B	79140	Coiled-coil domain containing 28B
DDX3Y	8653	DEAD (Asp-Glu-Ala-Asp) box polypeptide 3, Y-linked
GPR52	9293	G protein-coupled receptor 52
SSX3	10214	Synovial sarcoma, X breakpoint 3
AIM1L	55057	Absent in melanoma 1-like
C14orf105	55195	Chromosome 14 open reading frame 105
GRIK4	2900	Glutamate receptor, ionotropic, kainate 4
ZNF286A	57335	Zinc finger protein 286A
ST7L	54879	Suppression of tumorigenicity 7 like
PRG3	10394	Proteoglycan 3
CACNA1H	8912	Calcium channel, voltage-dependent, T type, alpha 1H subunit
GPR35	2859	G protein-coupled receptor 35
TNFSF11	8600	Tumor necrosis factor (ligand) superfamily, member 11
C19orf15	57828	Chromosome 19 open reading frame 15
HOXB9	3219	Homeobox B9
OPA3	80207	Optic atrophy 3 (autosomal recessive, with chorea and spastic paraplegia)
SOX18	54345	SRY (sex determining region Y)-box 18
HOXD10	3236	Homeobox D10
KCNJ14	3770	Potassium inwardly-rectifying channel, subfamily J, member 14
C6orf32	9750	Chromosome 6 open reading frame 32
LMO1	4004	LIM domain only 1 (rhombotin 1)
ESR2	2100	Estrogen receptor 2 (ER beta)
UTY	7404	Ubiquitously transcribed tetratricopeptide repeat gene, Y-linked
OPCML	4978	Opioid binding protein/cell adhesion molecule-like
GK2	2712	Glycerol kinase 2
PKLR	5313	Pyruvate kinase, liver and RBC
CRYAA	1409	Crystallin, alpha A
EHMT1	79813	Euchromatic histone-lysine N-methyltransferase 1
CLCA4	22802	Chloride channel, calcium activated, family member 4
F2RL3	9002	Coagulation factor II (thrombin) receptor-like 3
C10orf12	26148	Chromosome 10 open reading frame 12
GAN	8139	Giant axonal neuropathy (gigaxonin)
PAH	5053	Phenylalanine hydroxylase
LOC441601	441601	Septin 7 pseudogene
AFF1	4299	AF4/FMR2 family, member 1
MDM2	4193	Mdm2, transformed 3T3 cell double minute 2, p53 binding protein (mouse)
CNR1	1268	Cannabinoid receptor 1 (brain)
ST18	9705	Suppression of tumorigenicity 18 (breast carcinoma) (zinc finger protein)
ELK3	2004	ELK3, ETS-domain protein (SRF accessory protein 2)
SNAP91	9892	Synaptosomal-associated protein, 91kDa homolog (mouse)
PPP3CC	5533	Protein phosphatase 3 (formerly 2B), catalytic subunit, gamma isoform
MMP26	56547	Matrix metallopeptidase 26
CLPS	1208	Colipase, pancreatic
FAM124B	79843	Family with sequence similarity 124B
COLEC10	10584	Collectin sub-family member 10 (C-type lectin)
DOC2A	8448	Double C2-like domains, alpha
JARID1D	8284	Jumonji, AT rich interactive domain 1D
MYH8	4626	myosin, heavy chain 8, skeletal muscle, perinatal
ZNF749	388567	zinc finger protein 749
SHANK2	22941	SH3 and multiple ankyrin repeat domains 2
FANCA	2175	Fanconi anemia, complementation group A
RECQL5	9400	RecQ protein-like 5
PCLKC	54825	Protocadherin LKC
AGPAT3	56894	1-acylglycerol-3-phosphate O-acyltransferase 3
ACTN2	88	Actinin, alpha 2
HRC	3270	Histidine rich calcium binding protein
HCN4	10021	Hyperpolarization activated cyclic nucleotide-gated potassium channel 4
PDCD1LG2	80380	Programmed cell death 1 ligand 2
LOC93432	93432	Maltase-glucoamylase-like pseudogene
TRIM31	11074	Tripartite motif-containing 31
TRIM10	10107	Tripartite motif-containing 10
AFM	173	Afamin
KRTAP5-9	3846	Keratin associated protein 5-9
TRIM15	89870	Tripartite motif-containing 15
NCAM2	4685	Neural cell adhesion molecule 2
ACRV1	56	Acrosomal vesicle protein 1
ITIH3	3699	Inter-alpha (globulin) inhibitor H3
ZFY	7544	Zinc finger protein, Y-linked
HRH2	3274	Histamine receptor H2
CYP2C9	1559	Cytochrome P450, family 2, subfamily C, polypeptide 9
GPR17	2840	G protein-coupled receptor 17
HSD17B3	3293	Hydroxysteroid (17-beta) dehydrogenase 3
GIP	2695	Gastric inhibitory polypeptide
AMELX	265	Amelogenin (amelogenesis imperfecta 1, X-linked)
IL1RL1	9173	Interleukin 1 receptor-like 1
MTNR1A	4543	Melatonin receptor 1A
NFATC4	4776	Nuclear factor of activated T-cells, cytoplasmic, calcineurin-dependent 4
MYO1A	4640	Myosin IA
ZP2	7783	Zona pellucida glycoprotein 2 (sperm receptor)
APAF1	317	Apoptotic peptidase activating factor 1
NOS1	4842	Nitric oxide synthase 1 (neuronal)
MGAT4C	25834	Mannosyl (alpha-1,3-)-glycoprotein beta-1,4-N-acetylglucosaminyltransferase, isozyme C (putative)
ZNF787	126208	Zinc finger protein 787
CDH17	1015	Cadherin 17, LI cadherin (liver-intestine)
ELAC1	55520	ElaC homolog 1 (E. coli)
