# Supplementary material for: Integrated Analysis of Gene Expression Profiles Associated with Response of Platinum/Paclitaxel-Based Treatment in Epithelial Ovarian Cancer
Source: PLoS One. 2012 Dec 27;7(12):e52745. doi: 10.1371/journal.pone.0052745 (PMC3531383; doi:10.1371/journal.pone.0052745)
Supplement: Table S4 — Area Under the Curve of genes that encode secretory proteins. (XLSX) [file pone.0052745.s004.xlsx]

## Sheet: Table S4
Table S4. Area Under the Curve of genes that encode secretory proteins
	AUC	Std. Errora	Asymptotic Sig.b	Asymptotic 95% Confidence Interval
				Lower Bound	Upper Bound
CLPS	0.637	0.0413374	0.00802373	0.556	0.718
C1orf56	0.636	0.0478399	0.00868666	0.542	0.73
AFM	0.63	0.0547768	0.0121157	0.523	0.737
GIP	0.618	0.052361	0.0224997	0.515	0.721
PRG4	0.618	0.0524173	0.0227279	0.515	0.721
CPA2	0.617	0.0458969	0.0235424	0.527	0.707
FOLR1	0.61334	0.0469007	0.0285596	0.521416	0.705264
IL1RL1	0.608	0.0462458	0.036662	0.518	0.699
COMP	0.604	0.0548016	0.0449749	0.496	0.711
C6orf120	0.602	0.0500008	0.0479326	0.504	0.7
PLA2G2E	0.6	0.051267	0.0540994	0.499	0.7
F9	0.598	0.0501499	0.0578025	0.5	0.697
POSTN	0.596	0.0512025	0.0627932	0.496	0.697
COL11A1	0.595	0.0486682	0.0655598	0.5	0.691
SOSTDC1	0.593031	0.0476114	0.0723057	0.499715	0.686348
CPN1	0.589647	0.0532862	0.0833089	0.485208	0.694086
MMP2	0.587	0.0566208	0.0937323	0.476	0.698
NBL1	0.586	0.0556136	0.096399	0.477	0.695
PDCD1LG2	0.585366	0.0503291	0.099126	0.486723	0.684009
BMP2	0.585	0.051296	0.101512	0.484	0.685
SMR3B	0.584	0.0528626	0.105177	0.48	0.687
TNFSF11	0.584	0.0534883	0.10559	0.479	0.689
MBL2	0.582479	0.0556918	0.111085	0.473325	0.691633
PAPPA	0.580886	0.0513729	0.118155	0.480197	0.681575
AGR2	0.578198	0.0556305	0.130881	0.469164	0.687232
CALR	0.571429	0.0546474	0.167629	0.464322	0.678535
COLEC10	0.571	0.0457203	0.173023	0.481	0.66
COL5A2	0.57	0.0557384	0.176075	0.461	0.679
PCDHA10	0.56894	0.0471318	0.182931	0.476563	0.661316
COL6A1	0.569	0.0465787	0.185472	0.477	0.66
MMP26	0.566	0.0503911	0.201272	0.467	0.665
AGGF1	0.565	0.051449	0.212337	0.464	0.665
ZP2	0.563	0.0541951	0.222373	0.457	0.669
CRISP2	0.562	0.0429674	0.229747	0.478	0.646
SPON1	0.561872	0.0541847	0.231993	0.455672	0.668072
S100A9	0.561	0.05017	0.236531	0.463	0.66
DKK1	0.56	0.0573507	0.248938	0.447	0.672
APOH	0.559	0.0504012	0.25211	0.46	0.658
CARTPT	0.556	0.0543278	0.280208	0.449	0.662
SFTPB	0.552514	0.0462674	0.310361	0.461831	0.643196
SFRP1	0.551	0.0519461	0.320559	0.45	0.653
GFOD2	0.55	0.0601256	0.333851	0.432	0.668
AMELX	0.55	0.0476904	0.336745	0.456	0.643
CLCA4	0.546	0.0565427	0.369638	0.436	0.657
COL4A2	0.54445	0.0500376	0.390512	0.446378	0.642522
AEBP1	0.544	0.0554577	0.391574	0.436	0.653
APOA1	0.542558	0.0514916	0.410992	0.441637	0.64348
COL3A1	0.542	0.0578793	0.415384	0.429	0.656
RNASE4	0.542	0.0528677	0.415384	0.439	0.646
TFF3	0.540169	0.0484482	0.437753	0.445213	0.635126
FN1	0.54	0.057038	0.438889	0.428	0.652
ITIH3	0.536	0.0539708	0.488123	0.43	0.642
ERBB3	0.535	0.0583378	0.494176	0.421	0.65
EFEMP2	0.533698	0.0534981	0.515054	0.428844	0.638553
CCL23	0.531508	0.053117	0.542737	0.427401	0.635616
LOX	0.531	0.0546355	0.552985	0.424	0.638
THSD1	0.529	0.0555268	0.577696	0.42	0.638
B4GALT1	0.528	0.055792	0.590907	0.418	0.637
PXDN	0.528	0.0527099	0.592236	0.424	0.631
WNT10B	0.526	0.049965	0.62045	0.428	0.624
MUC5B	0.52454	0.0480635	0.635459	0.430337	0.618742
COL7A1	0.521553	0.0516806	0.677144	0.420261	0.622845
CLU	0.52	0.053349	0.701223	0.415	0.624
RARRES2	0.519662	0.0553847	0.704077	0.41111	0.628213
CRISP3	0.515879	0.0525368	0.759039	0.412908	0.618849
ATRN	0.514286	0.0540441	0.782569	0.408361	0.62021
SLPI	0.513191	0.0577649	0.798864	0.399974	0.626408
CD59	0.512	0.054157	0.819729	0.406	0.618
PROL1	0.51	0.0560017	0.840722	0.401	0.62
GGH	0.507	0.051863	0.887592	0.406	0.609
SEMA3A	0.507218	0.0570541	0.889111	0.395394	0.619042
CD164	0.507018	0.0483035	0.892151	0.412345	0.601692
CRH	0.505	0.0569645	0.921105	0.393	0.617
SECTM1	0.502539	0.0535668	0.960887	0.39755	0.607528
Abbreviations: Std.: standard. Sig: significance. a. Under the nonparametric assumption; b. Null hypothesis: true area = 0.5
