# Supplementary material for: Integrated Analysis of Gene Expression Profiles Associated with Response of Platinum/Paclitaxel-Based Treatment in Epithelial Ovarian Cancer
Source: PLoS One. 2012 Dec 27;7(12):e52745. doi: 10.1371/journal.pone.0052745 (PMC3531383; doi:10.1371/journal.pone.0052745)
Supplement: Table S5 — Genes interact with platinum or paclitaxel searched from CTD database. (XLSX) [file pone.0052745.s005.xlsx]

## Sheet: Table S5
Table S5. genes interact with platinum or paclitaxel searched from CTD database
# Input	ChemicalName	ChemicalID	CasRN	GeneSymbol	GeneID	Organism	OrganismID	Interaction	InteractionActions	PubMedIDs
cisplatin	cisplatin-deoxy(guanosine monophosphate guanosine) adduct	C094059		XPA	7507	Homo sapiens	9606	XPA protein results in decreased abundance of cisplatin-deoxy(guanosine monophosphate guanosine) adduct	decreases^abundance	21385444
cisplatin	cisplatin-DNA adduct	C057270		ERCC4	2072	Homo sapiens	9606	ERCC4 mRNA results in decreased abundance of cisplatin-DNA adduct	decreases^abundance	21452186
cisplatin	cisplatin-DNA adduct	C057270		ERCC5	2073	Homo sapiens	9606	ERCC5 mRNA results in decreased abundance of cisplatin-DNA adduct		21452186
cisplatin	cisplatin-DNA adduct	C057270		MAP2K4	6416	Homo sapiens	9606	cisplatin-DNA adduct results in increased activity of MAP2K4 protein	increases^activity	21324906
cisplatin	CMF protocol	C044626		F7	2155	Homo sapiens	9606	CMF protocol results in decreased expression of F7	decreases^expression	9281254
cisplatin	CMF protocol	C044626		PROC	5624	Homo sapiens	9606	CMF protocol results in decreased expression of PROC protein	decreases^expression	8879681
cisplatin	CMF protocol	C044626		PROS1	5627	Homo sapiens	9606	CMF protocol results in decreased expression of PROS1 protein	decreases^expression	8879681
cisplatin	COSS-86 protocol	C065868		AKR1C4	1109	Homo sapiens	9606	AKR1C4 results in decreased susceptibility to COSS-86 protocol	decreases^response to substance	14767549
cisplatin	COSS-86 protocol	C065868		GPX1	2876	Homo sapiens	9606	GPX1 results in decreased susceptibility to COSS-86 protocol	decreases^response to substance	14767549
cisplatin	COSS-86 protocol	C065868		GSTO1	9446	Homo sapiens	9606	GSTO1 results in decreased susceptibility to COSS-86 protocol	decreases^response to substance	14767549
cisplatin	Cisplatin	D002945	15663-27-1	A2M	2	Homo sapiens	9606	Cisplatin binds to A2M protein	affects^binding	16773208
cisplatin	Cisplatin	D002945	15663-27-1	AARS	16	Homo sapiens	9606	Cisplatin affects the reaction [Piroxicam results in decreased expression of AARS mRNA]	affects^reaction|decreases^expression	21858171
cisplatin	Cisplatin	D002945	15663-27-1	ABCA6	23460	Homo sapiens	9606	ABCA6 mRNA affects the susceptibility to Cisplatin	affects^response to substance	18610736
cisplatin	Cisplatin	D002945	15663-27-1	ABCB1	5243	Homo sapiens	9606	ABCB1 affects the reaction [HIF1A affects the susceptibility to Cisplatin]	affects^reaction|affects^response to substance	21964646
cisplatin	Cisplatin	D002945	15663-27-1	ABCB1	5243	Homo sapiens	9606	ABCB1 affects the susceptibility to Cisplatin	affects^response to substance	15756446
cisplatin	Cisplatin	D002945	15663-27-1	ABCB1	5243	Homo sapiens	9606	ABCB1 gene polymorphism affects the susceptibility to Cisplatin	affects^response to substance	16785472
cisplatin	Cisplatin	D002945	15663-27-1	ABCB1	5243	Homo sapiens	9606	ABCB1 gene SNP affects the susceptibility to [Cisplatin co-treated with Fluorouracil]	affects^cotreatment|affects^response to substance	21332314
cisplatin	Cisplatin	D002945	15663-27-1	ABCB1	5243	Homo sapiens	9606	ABCB1 protein inhibits the reaction [Cisplatin results in decreased expression of BCL2 protein]	decreases^expression|decreases^reaction	22269388
cisplatin	Cisplatin	D002945	15663-27-1	ABCB1	5243	Homo sapiens	9606	ABCB1 protein inhibits the reaction [Cisplatin results in increased activity of and results in increased cleavage of CASP3 protein]	decreases^reaction|increases^activity|increases^cleavage	22269388
cisplatin	Cisplatin	D002945	15663-27-1	ABCB1	5243	Homo sapiens	9606	ABCB1 protein inhibits the reaction [Cisplatin results in increased activity of CASP9 protein]	decreases^reaction|increases^activity	22269388
cisplatin	Cisplatin	D002945	15663-27-1	ABCB1	5243	Homo sapiens	9606	ABCB1 protein promotes the reaction [Cisplatin results in increased expression of TRP53 protein]	increases^expression|increases^reaction	22269388
cisplatin	Cisplatin	D002945	15663-27-1	ABCB1	5243	Homo sapiens	9606	ABCB1 protein results in decreased susceptibility to Cisplatin	decreases^response to substance	15990222|22269388
cisplatin	Cisplatin	D002945	15663-27-1	ABCB1	5243	Homo sapiens	9606	Cisplatin promotes the reaction [[APEX1 protein modified form promotes the reaction [YBX1 protein binds to EP300 protein]] which binds to ABCB1 promoter]	affects^binding|increases^reaction	20856196
cisplatin	Cisplatin	D002945	15663-27-1	ABCB1	5243	Homo sapiens	9606	[Cisplatin results in increased acetylation of APEX1 protein] promotes the reaction [APEX1 protein modified form binds to ABCB1 promoter]	affects^binding|increases^acetylation|increases^reaction	20856196
cisplatin	Cisplatin	D002945	15663-27-1	ABCB1	5243	Homo sapiens	9606	[Cisplatin results in increased acetylation of APEX1 protein] promotes the reaction [[APEX1 protein modified form binds to ABCB1 promoter] which results in increased expression of ABCB1 mRNA]	affects^binding|increases^acetylation|increases^expression|increases^reaction	20856196
cisplatin	Cisplatin	D002945	15663-27-1	ABCB1	5243	Homo sapiens	9606	Cisplatin results in increased expression of ABCB1 mRNA	increases^expression	15650019
cisplatin	Cisplatin	D002945	15663-27-1	ABCB1	5243	Homo sapiens	9606	Cisplatin results in increased expression of ABCB1 protein	increases^expression	15239124|15650019|15990222
cisplatin	Cisplatin	D002945	15663-27-1	ABCB1	5243	Homo sapiens	9606	[IL8 results in increased expression of ABCB1 mRNA] which results in decreased susceptibility to Cisplatin	decreases^response to substance|increases^expression	21742513
cisplatin	Cisplatin	D002945	15663-27-1	ABCB1	5243	Homo sapiens	9606	[IL8 results in increased expression of ABCB1 protein] which results in decreased susceptibility to Cisplatin	decreases^response to substance|increases^expression	21742513
cisplatin	Cisplatin	D002945	15663-27-1	ABCB1	5243	Homo sapiens	9606	[Paclitaxel results in increased expression of ABCB1] which results in decreased susceptibility to Cisplatin	decreases^response to substance|increases^expression	21833476
cisplatin	Cisplatin	D002945	15663-27-1	ABCB10	23456	Homo sapiens	9606	ABCB10 mRNA affects the susceptibility to Cisplatin	affects^response to substance	18610736
cisplatin	Cisplatin	D002945	15663-27-1	ABCB6	10058	Homo sapiens	9606	ABCB6 mRNA affects the susceptibility to Cisplatin	affects^response to substance	18610736
cisplatin	Cisplatin	D002945	15663-27-1	ABCB6	10058	Homo sapiens	9606	Cisplatin results in decreased expression of ABCB6 mRNA	decreases^expression	20737486
cisplatin	Cisplatin	D002945	15663-27-1	ABCB7	22	Homo sapiens	9606	ABCB7 mRNA affects the susceptibility to Cisplatin	affects^response to substance	18610736
cisplatin	Cisplatin	D002945	15663-27-1	ABCC1	4363	Homo sapiens	9606	ABCC1 affects the reaction [HIF1A affects the susceptibility to Cisplatin]	affects^reaction|affects^response to substance	21964646
cisplatin	Cisplatin	D002945	15663-27-1	ABCC1	4363	Homo sapiens	9606	ABCC1 affects the susceptibility to Cisplatin	affects^response to substance	15756446
cisplatin	Cisplatin	D002945	15663-27-1	ABCC1	4363	Homo sapiens	9606	ABCC1 mRNA results in decreased susceptibility to Cisplatin	decreases^response to substance	15448748
cisplatin	Cisplatin	D002945	15663-27-1	ABCC1	4363	Homo sapiens	9606	ABCC1 protein results in decreased susceptibility to Cisplatin	decreases^response to substance	21783896
cisplatin	Cisplatin	D002945	15663-27-1	ABCC1	4363	Homo sapiens	9606	[Cisplatin co-treated with Fluorouracil] results in decreased expression of ABCC1 mRNA	affects^cotreatment|decreases^expression	17638652
cisplatin	Cisplatin	D002945	15663-27-1	ABCC1	4363	Homo sapiens	9606	[PTGS2 protein results in increased expression of ABCC1 protein] which results in increased susceptibility to Cisplatin	increases^expression|increases^response to substance	18695918
cisplatin	Cisplatin	D002945	15663-27-1	ABCC2	1244	Homo sapiens	9606	ABCC2 affects the susceptibility to Cisplatin	affects^response to substance	15756446
cisplatin	Cisplatin	D002945	15663-27-1	ABCC2	1244	Homo sapiens	9606	ABCC2 protein affects the export of Cisplatin	affects^export	15985617
cisplatin	Cisplatin	D002945	15663-27-1	ABCC2	1244	Homo sapiens	9606	ABCC2 protein results in decreased susceptibility to Cisplatin	decreases^response to substance	15688364|17982673|21206495|21783896|8797578
cisplatin	Cisplatin	D002945	15663-27-1	ABCC2	1244	Homo sapiens	9606	Cisplatin results in decreased expression of ABCC2	decreases^expression	21905038
cisplatin	Cisplatin	D002945	15663-27-1	ABCC2	1244	Homo sapiens	9606	Cisplatin results in decreased expression of ABCC2 mRNA	decreases^expression	20737486
cisplatin	Cisplatin	D002945	15663-27-1	ABCC2	1244	Homo sapiens	9606	[PTGS2 protein results in increased expression of ABCC2 protein] which results in increased susceptibility to Cisplatin	increases^expression|increases^response to substance	18695918
cisplatin	Cisplatin	D002945	15663-27-1	ABCC3	8714	Homo sapiens	9606	ABCC3 mRNA affects the susceptibility to Cisplatin	affects^response to substance	18610736
cisplatin	Cisplatin	D002945	15663-27-1	ABCC3	8714	Homo sapiens	9606	ABCC3 protein results in decreased susceptibility to Cisplatin	decreases^response to substance	17982673
cisplatin	Cisplatin	D002945	15663-27-1	ABCC3	8714	Homo sapiens	9606	Cisplatin results in increased expression of ABCC3 mRNA	increases^expression	20737486
cisplatin	Cisplatin	D002945	15663-27-1	ABCC4	10257	Homo sapiens	9606	ABCC4 protein results in decreased susceptibility to Cisplatin	decreases^response to substance	17982673
cisplatin	Cisplatin	D002945	15663-27-1	ABCC5	10057	Homo sapiens	9606	ABCC5 mRNA results in decreased susceptibility to Cisplatin	decreases^response to substance	15882455
cisplatin	Cisplatin	D002945	15663-27-1	ABCC5	10057	Homo sapiens	9606	ABCC5 protein results in decreased susceptibility to Cisplatin	decreases^response to substance	17982673
cisplatin	Cisplatin	D002945	15663-27-1	ABCC8	6833	Homo sapiens	9606	ABCC8 mRNA affects the susceptibility to Cisplatin	affects^response to substance	18610736
cisplatin	Cisplatin	D002945	15663-27-1	ABCG2	9429	Homo sapiens	9606	[Cisplatin results in decreased susceptibility to Cisplatin] which results in increased expression of ABCG2 protein	decreases^response to substance|increases^expression	21342274
cisplatin	Cisplatin	D002945	15663-27-1	ABCG2	9429	Homo sapiens	9606	[ERBB2 results in increased expression of ABCG2] which results in decreased susceptibility to Cisplatin	decreases^response to substance|increases^expression	21712253
cisplatin	Cisplatin	D002945	15663-27-1	ABCG2	9429	Homo sapiens	9606	[Paclitaxel results in decreased expression of ABCG2] which results in decreased susceptibility to Cisplatin	decreases^expression|decreases^response to substance	21833476
cisplatin	Cisplatin	D002945	15663-27-1	ABHD11	83451	Homo sapiens	9606	ABHD11 protein affects the susceptibility to Cisplatin	affects^response to substance	16217747
cisplatin	Cisplatin	D002945	15663-27-1	ABHD2	11057	Homo sapiens	9606	ABHD2 protein affects the susceptibility to Cisplatin	affects^response to substance	16217747
cisplatin	Cisplatin	D002945	15663-27-1	ABL1	25	Homo sapiens	9606	ABL1 protein results in increased susceptibility to Cisplatin	increases^response to substance	21324906
cisplatin	Cisplatin	D002945	15663-27-1	ABL1	25	Homo sapiens	9606	[Cisplatin co-treated with 2,5,7,8-tetramethyl-2R-(4R,8R,12-trimethyltridecyl)chroman-6-yloxy acetic acid] results in increased phosphorylation of ABL1 protein	affects^cotreatment|increases^phosphorylation	21214929
cisplatin	Cisplatin	D002945	15663-27-1	ABL1	25	Homo sapiens	9606	[[Cisplatin co-treated with 2,5,7,8-tetramethyl-2R-(4R,8R,12-trimethyltridecyl)chroman-6-yloxy acetic acid] results in increased phosphorylation of ABL1 protein] which results in increased expression of TP73 protein	affects^cotreatment|increases^expression|increases^phosphorylation	21214929
cisplatin	Cisplatin	D002945	15663-27-1	ABL1	25	Homo sapiens	9606	[[[Cisplatin co-treated with 2,5,7,8-tetramethyl-2R-(4R,8R,12-trimethyltridecyl)chroman-6-yloxy acetic acid] results in increased phosphorylation of ABL1 protein] which results in increased expression of TP73 protein] which results in decreased expression of BCL2 protein	affects^cotreatment|decreases^expression|increases^expression|increases^phosphorylation	21214929
cisplatin	Cisplatin	D002945	15663-27-1	ABL1	25	Homo sapiens	9606	[[[Cisplatin co-treated with 2,5,7,8-tetramethyl-2R-(4R,8R,12-trimethyltridecyl)chroman-6-yloxy acetic acid] results in increased phosphorylation of ABL1 protein] which results in increased expression of TP73 protein] which results in increased expression of BAX protein	affects^cotreatment|increases^expression|increases^phosphorylation	21214929
cisplatin	Cisplatin	D002945	15663-27-1	ABL1	25	Homo sapiens	9606	[[[Cisplatin co-treated with 2,5,7,8-tetramethyl-2R-(4R,8R,12-trimethyltridecyl)chroman-6-yloxy acetic acid] results in increased phosphorylation of ABL1 protein] which results in increased expression of TP73 protein] which results in increased expression of FAS protein	affects^cotreatment|increases^expression|increases^phosphorylation	21214929
cisplatin	Cisplatin	D002945	15663-27-1	ABL1	25	Homo sapiens	9606	[[[Cisplatin co-treated with 2,5,7,8-tetramethyl-2R-(4R,8R,12-trimethyltridecyl)chroman-6-yloxy acetic acid] results in increased phosphorylation of ABL1 protein] which results in increased expression of TP73 protein] which results in increased expression of PMAIP1 protein	affects^cotreatment|increases^expression|increases^phosphorylation	21214929
cisplatin	Cisplatin	D002945	15663-27-1	ABL1	25	Homo sapiens	9606	[[[Cisplatin co-treated with 2,5,7,8-tetramethyl-2R-(4R,8R,12-trimethyltridecyl)chroman-6-yloxy acetic acid] results in increased phosphorylation of ABL1 protein] which results in increased expression of TP73 protein] which results in increased expression of TNFRSF10B protein	affects^cotreatment|increases^expression|increases^phosphorylation	21214929
cisplatin	Cisplatin	D002945	15663-27-1	ABL1	25	Homo sapiens	9606	[Cisplatin co-treated with panobinostat] affects the expression of ABL1 mRNA	affects^cotreatment|affects^expression	21791302
cisplatin	Cisplatin	D002945	15663-27-1	ABR	29	Homo sapiens	9606	ABR protein affects the susceptibility to Cisplatin	affects^response to substance	16217747
cisplatin	Cisplatin	D002945	15663-27-1	ABR	29	Homo sapiens	9606	Cisplatin results in decreased expression of ABR mRNA	decreases^expression	19561079
cisplatin	Cisplatin	D002945	15663-27-1	ABTB2	25841	Homo sapiens	9606	Cisplatin results in decreased expression of ABTB2 mRNA	decreases^expression	19561079
cisplatin	Cisplatin	D002945	15663-27-1	ACACA	31	Homo sapiens	9606	Cisplatin results in decreased expression of ACACA mRNA	decreases^expression	19561079
cisplatin	Cisplatin	D002945	15663-27-1	ACADVL	37	Homo sapiens	9606	[Piroxicam co-treated with Cisplatin] results in decreased expression of ACADVL mRNA	affects^cotreatment|decreases^expression	21858171
cisplatin	Cisplatin	D002945	15663-27-1	ACSL3	2181	Homo sapiens	9606	ACSL3 protein results in decreased susceptibility to Cisplatin	decreases^response to substance	16734730
cisplatin	Cisplatin	D002945	15663-27-1	ACVR1C	130399	Homo sapiens	9606	ACVR1C protein inhibits the reaction [MIR376C results in decreased susceptibility to Cisplatin]	decreases^reaction|decreases^response to substance	21224400
cisplatin	Cisplatin	D002945	15663-27-1	ACVR1C	130399	Homo sapiens	9606	ACVR1C results in increased susceptibility to Cisplatin	increases^response to substance	21224400
cisplatin	Cisplatin	D002945	15663-27-1	ACVR1C	130399	Homo sapiens	9606	Cisplatin results in increased expression of ACVR1C mRNA	increases^expression	21224400
cisplatin	Cisplatin	D002945	15663-27-1	ADAM10	102	Homo sapiens	9606	ADAM10 protein affects the susceptibility to Cisplatin	affects^response to substance	16217747
cisplatin	Cisplatin	D002945	15663-27-1	ADCK3	56997	Homo sapiens	9606	Cisplatin inhibits the reaction [Piroxicam results in increased expression of ADCK3 mRNA]	decreases^reaction|increases^expression	21858171
cisplatin	Cisplatin	D002945	15663-27-1	ADCK3	56997	Homo sapiens	9606	Cisplatin results in increased expression of ADCK3 mRNA	increases^expression	19561079
cisplatin	Cisplatin	D002945	15663-27-1	ADK	132	Homo sapiens	9606	Cisplatin results in decreased expression of ADK mRNA	decreases^expression	19561079
cisplatin	Cisplatin	D002945	15663-27-1	ADORA2B	136	Homo sapiens	9606	ADORA2B protein affects the susceptibility to Cisplatin	affects^response to substance	16217747
cisplatin	Cisplatin	D002945	15663-27-1	ADRM1	11047	Homo sapiens	9606	ADRM1 protein promotes the reaction [Cisplatin inhibits the reaction [IFNG protein results in increased expression of and results in increased activity of NOS2 protein]]	decreases^reaction|increases^activity|increases^expression|increases^reaction	20959455
cisplatin	Cisplatin	D002945	15663-27-1	ADRM1	11047	Homo sapiens	9606	Cisplatin promotes the reaction [ADRM1 protein binds to UCHL5 protein binds to STK11 protein alternative form]	affects^binding|increases^reaction	21191146
cisplatin	Cisplatin	D002945	15663-27-1	ADRM1	11047	Homo sapiens	9606	Cisplatin promotes the reaction [DDIT3 protein binds to ADRM1 promoter]	affects^binding|increases^reaction	20959455
cisplatin	Cisplatin	D002945	15663-27-1	ADRM1	11047	Homo sapiens	9606	Cisplatin promotes the reaction [NOS2 protein binds to ADRM1 protein binds to UCHL5 protein]	affects^binding|increases^reaction	20959455
cisplatin	Cisplatin	D002945	15663-27-1	ADRM1	11047	Homo sapiens	9606	Cisplatin promotes the reaction [RELA protein binds to ADRM1 promoter]	affects^binding|increases^reaction	20959455
cisplatin	Cisplatin	D002945	15663-27-1	ADRM1	11047	Homo sapiens	9606	Cisplatin promotes the reaction [TP63 protein modified form binds to ADRM1 promoter]	affects^binding|increases^reaction	20959455
cisplatin	Cisplatin	D002945	15663-27-1	ADRM1	11047	Homo sapiens	9606	Cisplatin results in increased expression of ADRM1 mRNA	increases^expression	20959455
cisplatin	Cisplatin	D002945	15663-27-1	ADRM1	11047	Homo sapiens	9606	Cisplatin results in increased expression of ADRM1 protein	increases^expression	20959455
cisplatin	Cisplatin	D002945	15663-27-1	ADRM1	11047	Homo sapiens	9606	[Cisplatin results in increased phosphorylation of TP63 protein alternative form] promotes the reaction [ADRM1 protein binds to UCHL5 protein binds to TP63 protein alternative form]	affects^binding|increases^phosphorylation|increases^reaction	21191146
cisplatin	Cisplatin	D002945	15663-27-1	ADRM1	11047	Homo sapiens	9606	[Cisplatin results in increased phosphorylation of TP63 protein alternative form] which results in increased expression of ADRM1 protein	increases^expression|increases^phosphorylation	21191146
cisplatin	Cisplatin	D002945	15663-27-1	ADRM1	11047	Homo sapiens	9606	TP63 protein alternative form promotes the reaction [Cisplatin results in increased expression of ADRM1 mRNA]	increases^expression|increases^reaction	20959455
cisplatin	Cisplatin	D002945	15663-27-1	ADRM1	11047	Homo sapiens	9606	TP63 protein promotes the reaction [Cisplatin promotes the reaction [NOS2 protein binds to ADRM1 protein binds to UCHL5 protein]]	affects^binding|increases^reaction	20959455
cisplatin	Cisplatin	D002945	15663-27-1	ADRM1	11047	Homo sapiens	9606	TP63 protein promotes the reaction [Cisplatin results in increased expression of ADRM1 protein]	increases^expression|increases^reaction	20959455
cisplatin	Cisplatin	D002945	15663-27-1	AGPAT9	84803	Homo sapiens	9606	Cisplatin results in increased expression of AGPAT9 mRNA	increases^expression	19561079
cisplatin	Cisplatin	D002945	15663-27-1	AHCY	191	Homo sapiens	9606	Cisplatin results in increased expression of AHCY protein	increases^expression	21424131
cisplatin	Cisplatin	D002945	15663-27-1	AHCYL1	10768	Homo sapiens	9606	AHCYL1 protein affects the susceptibility to Cisplatin	affects^response to substance	16217747
cisplatin	Cisplatin	D002945	15663-27-1	AK1	203	Homo sapiens	9606	Cisplatin results in increased expression of AK1 mRNA	increases^expression	19561079
cisplatin	Cisplatin	D002945	15663-27-1	AKAP12	9590	Homo sapiens	9606	AKAP12 protein affects the susceptibility to Cisplatin	affects^response to substance	16217747
cisplatin	Cisplatin	D002945	15663-27-1	AKAP12	9590	Homo sapiens	9606	Cisplatin affects the reaction [Piroxicam results in decreased expression of AKAP12 mRNA]	affects^reaction|decreases^expression	21858171
cisplatin	Cisplatin	D002945	15663-27-1	AKAP13	11214	Homo sapiens	9606	Cisplatin results in decreased expression of AKAP13 mRNA	decreases^expression	19561079
cisplatin	Cisplatin	D002945	15663-27-1	AKAP2	11217	Homo sapiens	9606	Cisplatin results in decreased expression of AKAP2 mRNA	decreases^expression	19561079
cisplatin	Cisplatin	D002945	15663-27-1	AKR1B1	231	Homo sapiens	9606	Cisplatin results in decreased expression of AKR1B1 protein	decreases^expression	16803524
cisplatin	Cisplatin	D002945	15663-27-1	AKR1B10	57016	Homo sapiens	9606	Cisplatin results in increased expression of AKR1B10 mRNA	increases^expression	19561079
cisplatin	Cisplatin	D002945	15663-27-1	AKR1C1	1645	Homo sapiens	9606	AKR1C1 protein results in decreased susceptibility to Cisplatin	decreases^response to substance	20953859
cisplatin	Cisplatin	D002945	15663-27-1	AKR1C2	1646	Homo sapiens	9606	AKR1C2 protein results in decreased susceptibility to Cisplatin	decreases^response to substance	20953859
cisplatin	Cisplatin	D002945	15663-27-1	AKT1	207	Homo sapiens	9606	2-(4-morpholinyl)-8-phenyl-4H-1-benzopyran-4-one promotes the reaction [Cisplatin results in decreased phosphorylation of AKT1 protein]	decreases^phosphorylation|increases^reaction	14755253
cisplatin	Cisplatin	D002945	15663-27-1	AKT1	207	Homo sapiens	9606	AKT1 protein inhibits the reaction [Cisplatin results in increased activity of CASP3 protein]	decreases^reaction|increases^activity	21266360
cisplatin	Cisplatin	D002945	15663-27-1	AKT1	207	Homo sapiens	9606	AKT1 protein inhibits the reaction [Cisplatin results in increased cleavage of PARP1 protein]	decreases^reaction|increases^cleavage	21266360
cisplatin	Cisplatin	D002945	15663-27-1	AKT1	207	Homo sapiens	9606	AKT1 protein results in decreased susceptibility to Cisplatin	decreases^response to substance	21266360|21351258
cisplatin	Cisplatin	D002945	15663-27-1	AKT1	207	Homo sapiens	9606	AKT1 results in decreased susceptibility to Cisplatin	decreases^response to substance	21849418
cisplatin	Cisplatin	D002945	15663-27-1	AKT1	207	Homo sapiens	9606	Cisplatin inhibits the reaction [Sirolimus results in increased phosphorylation of AKT1 protein]	decreases^reaction|increases^phosphorylation	21092744
cisplatin	Cisplatin	D002945	15663-27-1	AKT1	207	Homo sapiens	9606	Cisplatin inhibits the reaction [[Sirolimus results in increased phosphorylation of AKT1 protein] which results in increased phosphorylation of FOXO3A protein]	decreases^reaction|increases^phosphorylation	21092744
cisplatin	Cisplatin	D002945	15663-27-1	AKT1	207	Homo sapiens	9606	[Cisplatin inhibits the reaction [[Sirolimus results in increased phosphorylation of AKT1 protein] which results in increased phosphorylation of FOXO3A protein]] which results in increased expression of BCL2L11 protein	decreases^reaction|increases^expression|increases^phosphorylation	21092744
cisplatin	Cisplatin	D002945	15663-27-1	AKT1	207	Homo sapiens	9606	[Cisplatin inhibits the reaction [[Sirolimus results in increased phosphorylation of AKT1 protein] which results in increased phosphorylation of FOXO3A protein]] which results in increased expression of CDKN1B protein	decreases^reaction|increases^expression|increases^phosphorylation	21092744
cisplatin	Cisplatin	D002945	15663-27-1	AKT1	207	Homo sapiens	9606	Cisplatin promotes the reaction [2-(4-morpholinyl)-8-phenyl-4H-1-benzopyran-4-one results in decreased phosphorylation of AKT1 protein]	decreases^phosphorylation|increases^reaction	14755253
cisplatin	Cisplatin	D002945	15663-27-1	AKT1	207	Homo sapiens	9606	Cisplatin results in decreased expression of AKT1 mRNA	decreases^expression	21266360
cisplatin	Cisplatin	D002945	15663-27-1	AKT1	207	Homo sapiens	9606	Cisplatin results in decreased expression of AKT1 protein	decreases^expression	21266360
cisplatin	Cisplatin	D002945	15663-27-1	AKT1	207	Homo sapiens	9606	Cisplatin results in decreased expression of AKT1 protein modified form	decreases^expression	21266360
cisplatin	Cisplatin	D002945	15663-27-1	AKT1	207	Homo sapiens	9606	[Cisplatin results in decreased expression of TP63 protein alternative form] which results in decreased expression of AKT1	decreases^expression	21266360
cisplatin	Cisplatin	D002945	15663-27-1	AKT1	207	Homo sapiens	9606	Cisplatin results in decreased phosphorylation of AKT1 protein	decreases^phosphorylation	14755253|21603599|21821001
cisplatin	Cisplatin	D002945	15663-27-1	AKT1	207	Homo sapiens	9606	Cisplatin results in increased phosphorylation of and results in increased activity of AKT1 protein	increases^activity|increases^phosphorylation	15981204
cisplatin	Cisplatin	D002945	15663-27-1	AKT2	208	Homo sapiens	9606	Cisplatin results in increased expression of AKT2 protein	increases^expression	16803524
cisplatin	Cisplatin	D002945	15663-27-1	ALB	213	Homo sapiens	9606	Cisplatin binds to ALB protein	affects^binding	16773208
cisplatin	Cisplatin	D002945	15663-27-1	ALB	213	Homo sapiens	9606	[Leucovorin co-treated with Cisplatin co-treated with Fluorouracil] results in decreased expression of ALB protein	affects^cotreatment|decreases^expression	20180123
cisplatin	Cisplatin	D002945	15663-27-1	ALDH1A1	216	Homo sapiens	9606	Cisplatin results in decreased expression of ALDH1A1 mRNA	decreases^expression	11099651
cisplatin	Cisplatin	D002945	15663-27-1	ALG2	85365	Homo sapiens	9606	Cisplatin results in increased expression of ALG2 mRNA	increases^expression	19561079
cisplatin	Cisplatin	D002945	15663-27-1	ALKBH2	121642	Homo sapiens	9606	ALKBH2 protein results in decreased susceptibility to Cisplatin	decreases^response to substance	21278781
cisplatin	Cisplatin	D002945	15663-27-1	AMN	81693	Homo sapiens	9606	AMN protein inhibits the reaction [Cisplatin results in increased expression of TNF protein]	decreases^reaction|increases^expression	20514524
cisplatin	Cisplatin	D002945	15663-27-1	AMN	81693	Homo sapiens	9606	AMN protein inhibits the reaction [Cisplatin results in increased expression of TRP53 protein]	decreases^reaction|increases^expression	20514524
cisplatin	Cisplatin	D002945	15663-27-1	ANG	283	Homo sapiens	9606	Cisplatin results in increased expression of ANG mRNA	increases^expression	19561079
cisplatin	Cisplatin	D002945	15663-27-1	ANKRD11	29123	Homo sapiens	9606	Cisplatin results in decreased expression of ANKRD11 mRNA	decreases^expression	19561079
cisplatin	Cisplatin	D002945	15663-27-1	ANP32A	8125	Homo sapiens	9606	Cisplatin promotes the reaction [Piroxicam results in decreased expression of ANP32A mRNA]	decreases^expression|increases^reaction	21858171
cisplatin	Cisplatin	D002945	15663-27-1	ANXA1	301	Homo sapiens	9606	ANXA1 protein affects the susceptibility to Cisplatin	affects^response to substance	16217747
cisplatin	Cisplatin	D002945	15663-27-1	ANXA1	301	Homo sapiens	9606	Cisplatin results in increased expression of ANXA1 protein	increases^expression	21924258
cisplatin	Cisplatin	D002945	15663-27-1	ANXA10	11199	Homo sapiens	9606	[Piroxicam co-treated with Cisplatin] results in increased expression of ANXA10 mRNA	affects^cotreatment|increases^expression	21858171
cisplatin	Cisplatin	D002945	15663-27-1	ANXA5	308	Homo sapiens	9606	Cisplatin results in decreased expression of ANXA5 protein	decreases^expression	21924258
cisplatin	Cisplatin	D002945	15663-27-1	APAF1	317	Homo sapiens	9606	[trichostatin A results in increased activity of APAF1 protein] which results in increased susceptibility to Cisplatin	increases^activity|increases^response to substance	20925046
cisplatin	Cisplatin	D002945	15663-27-1	APEX1	328	Homo sapiens	9606	APEX1 protein results in decreased susceptibility to Cisplatin	decreases^response to substance	16373707|20856196
cisplatin	Cisplatin	D002945	15663-27-1	APEX1	328	Homo sapiens	9606	Cisplatin promotes the reaction [APEX1 protein modified form binds to [YBX1 protein binds to EP300 protein]]	affects^binding|increases^reaction	20856196
cisplatin	Cisplatin	D002945	15663-27-1	APEX1	328	Homo sapiens	9606	Cisplatin promotes the reaction [[APEX1 protein modified form promotes the reaction [YBX1 protein binds to EP300 protein]] which binds to ABCB1 promoter]	affects^binding|increases^reaction	20856196
cisplatin	Cisplatin	D002945	15663-27-1	APEX1	328	Homo sapiens	9606	Cisplatin results in increased acetylation of APEX1 protein	increases^acetylation	20856196
cisplatin	Cisplatin	D002945	15663-27-1	APEX1	328	Homo sapiens	9606	[Cisplatin results in increased acetylation of APEX1 protein] promotes the reaction [APEX1 protein modified form binds to ABCB1 promoter]	affects^binding|increases^acetylation|increases^reaction	20856196
cisplatin	Cisplatin	D002945	15663-27-1	APEX1	328	Homo sapiens	9606	[Cisplatin results in increased acetylation of APEX1 protein] promotes the reaction [[APEX1 protein modified form binds to ABCB1 promoter] which results in increased expression of ABCB1 mRNA]	affects^binding|increases^acetylation|increases^expression|increases^reaction	20856196
cisplatin	Cisplatin	D002945	15663-27-1	APEX1	328	Homo sapiens	9606	EP300 protein promotes the reaction [Cisplatin results in increased acetylation of APEX1 protein]	increases^acetylation|increases^reaction	20856196
cisplatin	Cisplatin	D002945	15663-27-1	APLP2	334	Homo sapiens	9606	Cisplatin inhibits the reaction [Piroxicam results in decreased expression of APLP2 mRNA]	decreases^expression|decreases^reaction	21858171
cisplatin	Cisplatin	D002945	15663-27-1	APOC3	345	Homo sapiens	9606	Cisplatin results in decreased expression of APOC3 mRNA	decreases^expression	11099651
cisplatin	Cisplatin	D002945	15663-27-1	APOE	348	Homo sapiens	9606	APOE protein results in decreased susceptibility to Cisplatin	decreases^response to substance	20430468
cisplatin	Cisplatin	D002945	15663-27-1	ARC	23237	Homo sapiens	9606	[Piroxicam co-treated with Cisplatin] results in decreased expression of ARC mRNA	affects^cotreatment|decreases^expression	21858171
cisplatin	Cisplatin	D002945	15663-27-1	AREG	374	Homo sapiens	9606	Cisplatin results in increased expression of AREG protein	increases^expression	20726858
cisplatin	Cisplatin	D002945	15663-27-1	ARF6	382	Homo sapiens	9606	ARF6 protein affects the susceptibility to Cisplatin	affects^response to substance	16217747
cisplatin	Cisplatin	D002945	15663-27-1	ARFGEF1	10565	Homo sapiens	9606	ARFGEF1 results in increased susceptibility to Cisplatin	increases^response to substance	21755009
cisplatin	Cisplatin	D002945	15663-27-1	ARHGAP10	79658	Homo sapiens	9606	Cisplatin results in increased expression of ARHGAP10 mRNA	increases^expression	19561079
cisplatin	Cisplatin	D002945	15663-27-1	ARHGAP22	58504	Homo sapiens	9606	Cisplatin results in decreased expression of ARHGAP22 mRNA	decreases^expression	19561079
cisplatin	Cisplatin	D002945	15663-27-1	ARHGAP24	83478	Homo sapiens	9606	Cisplatin results in decreased expression of ARHGAP24 mRNA	decreases^expression	21603599
cisplatin	Cisplatin	D002945	15663-27-1	ARHGEF2	9181	Homo sapiens	9606	Cisplatin inhibits the reaction [Piroxicam results in decreased expression of ARHGEF2 mRNA]	decreases^expression|decreases^reaction	21858171
cisplatin	Cisplatin	D002945	15663-27-1	ARHGEF6	9459	Homo sapiens	9606	Cisplatin results in decreased expression of ARHGEF6 protein	decreases^expression	16803524
cisplatin	Cisplatin	D002945	15663-27-1	ARID5B	84159	Homo sapiens	9606	ARID5B protein affects the susceptibility to Cisplatin	affects^response to substance	16217747
cisplatin	Cisplatin	D002945	15663-27-1	ARMCX2	9823	Homo sapiens	9606	ARMCX2 protein affects the susceptibility to Cisplatin	affects^response to substance	16217747
cisplatin	Cisplatin	D002945	15663-27-1	ARNTL2	56938	Homo sapiens	9606	[Cisplatin co-treated with panobinostat] affects the expression of ARNTL2 mRNA	affects^cotreatment|affects^expression	21791302
cisplatin	Cisplatin	D002945	15663-27-1	AS3MT	57412	Homo sapiens	9606	[Cisplatin co-treated with panobinostat] affects the expression of AS3MT mRNA	affects^cotreatment|affects^expression	21791302
cisplatin	Cisplatin	D002945	15663-27-1	ASNA-1	176254	Homo sapiens	9606	ASNA-1 protein affects the susceptibility to Cisplatin	affects^response to substance	20966125
cisplatin	Cisplatin	D002945	15663-27-1	ASPM	259266	Homo sapiens	9606	Cisplatin promotes the reaction [Piroxicam results in decreased expression of ASPM mRNA]	decreases^expression|increases^reaction	21858171
cisplatin	Cisplatin	D002945	15663-27-1	ASS1	445	Homo sapiens	9606	ASS1 protein affects the susceptibility to Cisplatin	affects^response to substance	16217747
cisplatin	Cisplatin	D002945	15663-27-1	ASTN1	460	Homo sapiens	9606	ASTN1 protein affects the susceptibility to Cisplatin	affects^response to substance	16217747
cisplatin	Cisplatin	D002945	15663-27-1	ATF2	1386	Homo sapiens	9606	4-(4-fluorophenyl)-2-(4-hydroxyphenyl)-5-(4-pyridyl)imidazole inhibits the reaction [ATF2 protein results in decreased susceptibility to Cisplatin]	decreases^reaction|decreases^response to substance	12663670
cisplatin	Cisplatin	D002945	15663-27-1	ATF2	1386	Homo sapiens	9606	4-(4-fluorophenyl)-2-(4-hydroxyphenyl)-5-(4-pyridyl)imidazole inhibits the reaction [Cisplatin results in increased activity of ATF2 protein]	decreases^reaction|increases^activity	12663670
cisplatin	Cisplatin	D002945	15663-27-1	ATF2	1386	Homo sapiens	9606	4-(4-fluorophenyl)-2-(4-hydroxyphenyl)-5-(4-pyridyl)imidazole inhibits the reaction [Cisplatin results in increased phosphorylation of and results in increased activity of ATF2 protein]	decreases^reaction|increases^activity|increases^phosphorylation	12663670
cisplatin	Cisplatin	D002945	15663-27-1	ATF2	1386	Homo sapiens	9606	anthra(1,9-cd)pyrazol-6(2H)-one inhibits the reaction [ATF2 protein results in decreased susceptibility to Cisplatin]	decreases^reaction|decreases^response to substance	12663670
cisplatin	Cisplatin	D002945	15663-27-1	ATF2	1386	Homo sapiens	9606	anthra(1,9-cd)pyrazol-6(2H)-one inhibits the reaction [Cisplatin results in increased activity of ATF2 protein]	decreases^reaction|increases^activity	12663670
cisplatin	Cisplatin	D002945	15663-27-1	ATF2	1386	Homo sapiens	9606	anthra(1,9-cd)pyrazol-6(2H)-one inhibits the reaction [Cisplatin results in increased phosphorylation of and results in increased activity of ATF2 protein]	decreases^reaction|increases^activity|increases^phosphorylation	12663670
cisplatin	Cisplatin	D002945	15663-27-1	ATF2	1386	Homo sapiens	9606	ATF2 protein results in decreased susceptibility to Cisplatin	decreases^response to substance	12663670
cisplatin	Cisplatin	D002945	15663-27-1	ATF2	1386	Homo sapiens	9606	Cisplatin results in increased phosphorylation of and results in increased activity of ATF2 protein	increases^activity|increases^phosphorylation	12663670
cisplatin	Cisplatin	D002945	15663-27-1	ATF3	467	Homo sapiens	9606	Cisplatin inhibits the reaction [Piroxicam results in decreased expression of ATF3 mRNA]	decreases^expression|decreases^reaction	21858171
cisplatin	Cisplatin	D002945	15663-27-1	ATF3	467	Homo sapiens	9606	Cisplatin results in increased expression of ATF3 mRNA	increases^expression	21532991|21603599
cisplatin	Cisplatin	D002945	15663-27-1	ATG5	9474	Homo sapiens	9606	ATG5 affects the reaction [NACC1 affects the susceptibility to Cisplatin]	affects^reaction|affects^response to substance	21743489
cisplatin	Cisplatin	D002945	15663-27-1	ATG5	9474	Homo sapiens	9606	ATG5 protein results in decreased susceptibility to Cisplatin	decreases^response to substance	21351258
cisplatin	Cisplatin	D002945	15663-27-1	ATG7	10533	Homo sapiens	9606	Cisplatin results in decreased expression of ATG7 mRNA	decreases^expression	19561079
cisplatin	Cisplatin	D002945	15663-27-1	ATM	472	Homo sapiens	9606	ATM protein results in increased susceptibility to Cisplatin	increases^response to substance	21324906
cisplatin	Cisplatin	D002945	15663-27-1	ATM	472	Homo sapiens	9606	Cisplatin results in increased expression of ATM protein modified form	increases^expression	21184746
cisplatin	Cisplatin	D002945	15663-27-1	ATM	472	Homo sapiens	9606	Cisplatin results in increased phosphorylation of and results in increased activity of ATM protein	increases^activity|increases^phosphorylation	20145152
cisplatin	Cisplatin	D002945	15663-27-1	ATM	472	Homo sapiens	9606	[Cisplatin results in increased phosphorylation of TP63 protein alternative form] promotes the reaction [TP63 protein alternative form binds to ATM promoter]	affects^binding|increases^phosphorylation|increases^reaction	21191146
cisplatin	Cisplatin	D002945	15663-27-1	ATM	472	Homo sapiens	9606	[Cisplatin results in increased phosphorylation of TP63 protein alternative form] promotes the reaction [TP63 protein alternative form results in increased expression of ATM protein]	increases^expression|increases^phosphorylation|increases^reaction	21191146
cisplatin	Cisplatin	D002945	15663-27-1	ATM	472	Homo sapiens	9606	MIR630 mRNA inhibits the reaction [Cisplatin results in increased phosphorylation of and results in increased activity of ATM protein]	decreases^reaction|increases^activity|increases^phosphorylation	20145152
cisplatin	Cisplatin	D002945	15663-27-1	ATP1B1	481	Homo sapiens	9606	Cisplatin inhibits the reaction [Piroxicam results in decreased expression of ATP1B1 mRNA]	decreases^expression|decreases^reaction	21858171
cisplatin	Cisplatin	D002945	15663-27-1	ATP5G1	516	Homo sapiens	9606	[Piroxicam co-treated with Cisplatin] results in increased expression of ATP5G1 mRNA	affects^cotreatment|increases^expression	21858171
cisplatin	Cisplatin	D002945	15663-27-1	ATP6AP2	10159	Homo sapiens	9606	ATP6AP2 mRNA affects the susceptibility to Cisplatin	affects^response to substance	18610736
cisplatin	Cisplatin	D002945	15663-27-1	ATP6V1A	523	Homo sapiens	9606	ATP6V1A mRNA affects the susceptibility to Cisplatin	affects^response to substance	18610736
cisplatin	Cisplatin	D002945	15663-27-1	ATP6V1C1	528	Homo sapiens	9606	ATP6V1C1 mRNA affects the susceptibility to Cisplatin	affects^response to substance	18610736
cisplatin	Cisplatin	D002945	15663-27-1	ATP6V1C2	245973	Homo sapiens	9606	ATP6V1C2 mRNA affects the susceptibility to Cisplatin	affects^response to substance	18610736
cisplatin	Cisplatin	D002945	15663-27-1	ATP6V1G2	534	Homo sapiens	9606	ATP6V1G2 protein affects the susceptibility to Cisplatin	affects^response to substance	16217747
cisplatin	Cisplatin	D002945	15663-27-1	ATP6V1H	51606	Homo sapiens	9606	ATP6V1H mRNA affects the susceptibility to Cisplatin	affects^response to substance	18610736
cisplatin	Cisplatin	D002945	15663-27-1	ATP7A	538	Homo sapiens	9606	ATP7A protein results in decreased susceptibility to Cisplatin	decreases^response to substance	17510416
cisplatin	Cisplatin	D002945	15663-27-1	ATP7B	540	Homo sapiens	9606	ATP7B mRNA affects the susceptibility to Cisplatin	affects^response to substance	18610736
cisplatin	Cisplatin	D002945	15663-27-1	ATP7B	540	Homo sapiens	9606	ATP7B protein results in decreased susceptibility to Cisplatin	decreases^response to substance	10728692|12509969
cisplatin	Cisplatin	D002945	15663-27-1	ATP7B	540	Homo sapiens	9606	ATP7B protein results in increased secretion of Cisplatin	increases^secretion	10728692
cisplatin	Cisplatin	D002945	15663-27-1	ATP7B	540	Homo sapiens	9606	Cisplatin results in increased stability of and results in increased activity of and affects the localization of ATP7B protein polymorphism	affects^localization|increases^activity|increases^stability	21406592
cisplatin	Cisplatin	D002945	15663-27-1	ATR	545	Homo sapiens	9606	[4-cyclohexylmethoxy-5-nitrosopyrimidine-2,6-diamine results in decreased activity of ATR] which results in increased susceptibility to Cisplatin	decreases^activity|increases^response to substance	21730979
cisplatin	Cisplatin	D002945	15663-27-1	ATR	545	Homo sapiens	9606	[ATR co-treated with TP53] results in decreased susceptibility to Cisplatin	affects^cotreatment|decreases^response to substance	21258400
cisplatin	Cisplatin	D002945	15663-27-1	ATR	545	Homo sapiens	9606	ATR results in decreased susceptibility to Cisplatin	decreases^response to substance	21652733
cisplatin	Cisplatin	D002945	15663-27-1	ATR	545	Homo sapiens	9606	Cisplatin promotes the reaction [MSH2 protein binds to and affects the localization of ATR protein]	affects^binding|affects^localization|increases^reaction	21285353
cisplatin	Cisplatin	D002945	15663-27-1	ATR	545	Homo sapiens	9606	Cisplatin results in increased activity of ATR protein	increases^activity	21324906
cisplatin	Cisplatin	D002945	15663-27-1	ATR	545	Homo sapiens	9606	ERCC6 protein inhibits the reaction [Cisplatin results in increased activity of ATR protein]	decreases^reaction|increases^activity	21324906
cisplatin	Cisplatin	D002945	15663-27-1	AURKA	6790	Homo sapiens	9606	AURKA protein results in decreased susceptibility to Cisplatin	decreases^response to substance	20890087
cisplatin	Cisplatin	D002945	15663-27-1	AURKA	6790	Homo sapiens	9606	MYC protein promotes the reaction [AURKA protein results in decreased susceptibility to Cisplatin]	decreases^response to substance|increases^reaction	20890087
cisplatin	Cisplatin	D002945	15663-27-1	AVPI1	60370	Homo sapiens	9606	Cisplatin promotes the reaction [Piroxicam results in decreased expression of AVPI1 mRNA]	decreases^expression|increases^reaction	21858171
cisplatin	Cisplatin	D002945	15663-27-1	AVPI1	60370	Homo sapiens	9606	Cisplatin results in increased expression of AVPI1 mRNA	increases^expression	19561079
cisplatin	Cisplatin	D002945	15663-27-1	AXL	558	Homo sapiens	9606	Cisplatin results in increased expression of AXL mRNA	increases^expression	16061661
cisplatin	Cisplatin	D002945	15663-27-1	B3GALT4	8705	Homo sapiens	9606	B3GALT4 protein affects the susceptibility to Cisplatin	affects^response to substance	16217747
cisplatin	Cisplatin	D002945	15663-27-1	BACH1	571	Homo sapiens	9606	BACH1 protein affects the susceptibility to Cisplatin	affects^response to substance	16217747
cisplatin	Cisplatin	D002945	15663-27-1	BAD	572	Homo sapiens	9606	BAD protein modified form results in decreased susceptibility to Cisplatin	decreases^response to substance	21849418
cisplatin	Cisplatin	D002945	15663-27-1	BAD	572	Homo sapiens	9606	BAD results in decreased susceptibility to Cisplatin	decreases^response to substance	21849418
cisplatin	Cisplatin	D002945	15663-27-1	BAD	572	Homo sapiens	9606	Cisplatin promotes the reaction [Metformin results in increased expression of BAD protein]	increases^expression|increases^reaction	21388661
cisplatin	Cisplatin	D002945	15663-27-1	BAD	572	Homo sapiens	9606	Cisplatin results in increased expression of BAD mRNA	increases^expression	20878077
cisplatin	Cisplatin	D002945	15663-27-1	BAD	572	Homo sapiens	9606	[PPM1A results in decreased phosphorylation of BAD protein] which results in increased susceptibility to Cisplatin	decreases^phosphorylation|increases^response to substance	21849418
cisplatin	Cisplatin	D002945	15663-27-1	BAD	572	Homo sapiens	9606	[PRKACA results in increased phosphorylation of BAD protein] which results in decreased susceptibility to Cisplatin	decreases^response to substance|increases^phosphorylation	21849418
cisplatin	Cisplatin	D002945	15663-27-1	BAD	572	Homo sapiens	9606	Y 27632 inhibits the reaction [Cisplatin results in increased expression of BAD mRNA]	decreases^reaction|increases^expression	20878077
cisplatin	Cisplatin	D002945	15663-27-1	BAG1	573	Homo sapiens	9606	Cisplatin results in increased expression of BAG1 mRNA	increases^expression	19561079
cisplatin	Cisplatin	D002945	15663-27-1	BAG5	9529	Homo sapiens	9606	[Cisplatin co-treated with panobinostat] affects the expression of BAG5 mRNA	affects^cotreatment|affects^expression	21791302
cisplatin	Cisplatin	D002945	15663-27-1	BAG6	7917	Homo sapiens	9606	[Piroxicam co-treated with Cisplatin] results in decreased expression of BAG6 mRNA	affects^cotreatment|decreases^expression	21858171
cisplatin	Cisplatin	D002945	15663-27-1	BAK	397543	Homo sapiens	9606	BAK protein results in increased susceptibility to Cisplatin	increases^response to substance	17688235
cisplatin	Cisplatin	D002945	15663-27-1	BAK	397543	Homo sapiens	9606	Cisplatin results in increased expression of BAK mRNA	increases^expression	11099651
cisplatin	Cisplatin	D002945	15663-27-1	BAK	397543	Homo sapiens	9606	Cisplatin results in increased expression of BAK protein	increases^expression	21052098
cisplatin	Cisplatin	D002945	15663-27-1	BAK	397543	Homo sapiens	9606	ING4 protein promotes the reaction [Cisplatin results in increased expression of BAK protein]	increases^expression|increases^reaction	21052098
cisplatin	Cisplatin	D002945	15663-27-1	BAK1	578	Homo sapiens	9606	[Cisplatin co-treated with fisetin] results in increased expression of BAK1 protein	affects^cotreatment|increases^expression	21216935
cisplatin	Cisplatin	D002945	15663-27-1	BATF3	55509	Homo sapiens	9606	[Cisplatin co-treated with panobinostat] affects the expression of BATF3 mRNA	affects^cotreatment|affects^expression	21791302
cisplatin	Cisplatin	D002945	15663-27-1	BAX	581	Homo sapiens	9606	Acetylcysteine inhibits the reaction [Cisplatin results in increased expression of and results in increased activity of BAX protein]	decreases^reaction|increases^activity|increases^expression	17574045
cisplatin	Cisplatin	D002945	15663-27-1	BAX	581	Homo sapiens	9606	Acetylcysteine inhibits the reaction [Cisplatin results in increased expression of BAX protein]	decreases^reaction|increases^expression	15496615
cisplatin	Cisplatin	D002945	15663-27-1	BAX	581	Homo sapiens	9606	BAX results in decreased susceptibility to Cisplatin	decreases^response to substance	21849418
cisplatin	Cisplatin	D002945	15663-27-1	BAX	581	Homo sapiens	9606	BCL2 protein inhibits the reaction [Cisplatin affects the localization of BAX protein]	affects^localization|decreases^reaction	16009487
cisplatin	Cisplatin	D002945	15663-27-1	BAX	581	Homo sapiens	9606	beta-solamarine promotes the reaction [Cisplatin results in increased expression of BAX protein]	increases^expression|increases^reaction	17619073
cisplatin	Cisplatin	D002945	15663-27-1	BAX	581	Homo sapiens	9606	Cisplatin affects the localization of BAX protein	affects^localization	16009487
cisplatin	Cisplatin	D002945	15663-27-1	BAX	581	Homo sapiens	9606	[[Cisplatin co-treated with 2,5,7,8-tetramethyl-2R-(4R,8R,12-trimethyltridecyl)chroman-6-yloxy acetic acid] results in increased expression of TP73 protein] which results in increased expression of BAX mRNA	affects^cotreatment|increases^expression	21214929
cisplatin	Cisplatin	D002945	15663-27-1	BAX	581	Homo sapiens	9606	[[Cisplatin co-treated with 2,5,7,8-tetramethyl-2R-(4R,8R,12-trimethyltridecyl)chroman-6-yloxy acetic acid] results in increased expression of TP73 protein] which results in increased expression of BAX protein	affects^cotreatment|increases^expression	21214929
cisplatin	Cisplatin	D002945	15663-27-1	BAX	581	Homo sapiens	9606	[[[Cisplatin co-treated with 2,5,7,8-tetramethyl-2R-(4R,8R,12-trimethyltridecyl)chroman-6-yloxy acetic acid] results in increased phosphorylation of ABL1 protein] which results in increased expression of TP73 protein] which results in increased expression of BAX protein	affects^cotreatment|increases^expression|increases^phosphorylation	21214929
cisplatin	Cisplatin	D002945	15663-27-1	BAX	581	Homo sapiens	9606	[Cisplatin co-treated with Etoposide] affects the localization of BAX protein	affects^cotreatment|affects^localization	18676776
cisplatin	Cisplatin	D002945	15663-27-1	BAX	581	Homo sapiens	9606	[Cisplatin co-treated with TP73 protein] results in increased expression of BAX protein	affects^cotreatment|increases^expression	20100536
cisplatin	Cisplatin	D002945	15663-27-1	BAX	581	Homo sapiens	9606	Cisplatin promotes the reaction [2,2-bis(hydroxymethyl)-1-azabicyclo(2,2,2,)octan-3-one results in increased expression of BAX mRNA]	increases^expression|increases^reaction	21109480
cisplatin	Cisplatin	D002945	15663-27-1	BAX	581	Homo sapiens	9606	Cisplatin promotes the reaction [BAX protein binds to BAX protein]	affects^binding|increases^reaction	20145152
cisplatin	Cisplatin	D002945	15663-27-1	BAX	581	Homo sapiens	9606	Cisplatin promotes the reaction [Metformin results in increased expression of BAX protein]	increases^expression|increases^reaction	21388661
cisplatin	Cisplatin	D002945	15663-27-1	BAX	581	Homo sapiens	9606	Cisplatin promotes the reaction [nutlin 3 results in increased expression of BAX mRNA]	increases^expression|increases^reaction	21109480
cisplatin	Cisplatin	D002945	15663-27-1	BAX	581	Homo sapiens	9606	Cisplatin promotes the reaction [TP53 protein results in increased expression of BAX]	increases^expression|increases^reaction	21552291
cisplatin	Cisplatin	D002945	15663-27-1	BAX	581	Homo sapiens	9606	[Cisplatin results in decreased susceptibility to Cisplatin] which results in decreased expression of BAX protein	decreases^expression|decreases^response to substance	21130731
cisplatin	Cisplatin	D002945	15663-27-1	BAX	581	Homo sapiens	9606	Cisplatin results in increased expression of and results in increased activity of BAX protein	increases^activity|increases^expression	17574045
cisplatin	Cisplatin	D002945	15663-27-1	BAX	581	Homo sapiens	9606	Cisplatin results in increased expression of BAX mRNA	increases^expression	15641988|20309937|20655883
cisplatin	Cisplatin	D002945	15663-27-1	BAX	581	Homo sapiens	9606	Cisplatin results in increased expression of BAX protein	increases^expression	14512787|15496615|15641988|17619073|20145152|20674069|21052098|21420390|21618512|21641698|21660965
cisplatin	Cisplatin	D002945	15663-27-1	BAX	581	Homo sapiens	9606	Cisplatin results in increased localization of BAX protein	increases^localization	20654585
cisplatin	Cisplatin	D002945	15663-27-1	BAX	581	Homo sapiens	9606	CITED2 mutant form promotes the reaction [Cisplatin results in increased expression of BAX protein]	increases^expression|increases^reaction	21660965
cisplatin	Cisplatin	D002945	15663-27-1	BAX	581	Homo sapiens	9606	[CITED2 results in decreased susceptibility to Cisplatin] which results in decreased expression of BAX protein	decreases^expression|decreases^response to substance	21660965
cisplatin	Cisplatin	D002945	15663-27-1	BAX	581	Homo sapiens	9606	ING4 protein promotes the reaction [Cisplatin results in increased expression of BAX protein]	increases^expression|increases^reaction	21052098
cisplatin	Cisplatin	D002945	15663-27-1	BAX	581	Homo sapiens	9606	MIR630 mRNA inhibits the reaction [Cisplatin promotes the reaction [BAX protein binds to BAX protein]]	affects^binding|decreases^reaction|increases^reaction	20145152
cisplatin	Cisplatin	D002945	15663-27-1	BAX	581	Homo sapiens	9606	MIR630 mRNA inhibits the reaction [Cisplatin results in increased expression of BAX protein]	decreases^reaction|increases^expression	20145152
cisplatin	Cisplatin	D002945	15663-27-1	BAX	581	Homo sapiens	9606	Nicotine inhibits the reaction [[Cisplatin co-treated with Etoposide] affects the localization of BAX protein]	affects^cotreatment|affects^localization|decreases^reaction	18676776
cisplatin	Cisplatin	D002945	15663-27-1	BAX	581	Homo sapiens	9606	Noscapine promotes the reaction [Cisplatin results in increased expression of BAX protein]	increases^expression|increases^reaction	20674069
cisplatin	Cisplatin	D002945	15663-27-1	BAX	581	Homo sapiens	9606	pifithrin inhibits the reaction [Cisplatin results in increased expression of BAX protein]	decreases^reaction|increases^expression	21660965
cisplatin	Cisplatin	D002945	15663-27-1	BAX	581	Homo sapiens	9606	pifithrin inhibits the reaction [CITED2 mutant form promotes the reaction [Cisplatin results in increased expression of BAX protein]]	decreases^reaction|increases^expression|increases^reaction	21660965
cisplatin	Cisplatin	D002945	15663-27-1	BAX	581	Homo sapiens	9606	PLK1 protein inhibits the reaction [Cisplatin results in increased expression of BAX mRNA]	decreases^reaction|increases^expression	20655883
cisplatin	Cisplatin	D002945	15663-27-1	BAX	581	Homo sapiens	9606	[Quercetin results in increased susceptibility to Cisplatin] which results in increased expression of BAX protein	increases^expression|increases^response to substance	16619537
cisplatin	Cisplatin	D002945	15663-27-1	BAX	581	Homo sapiens	9606	[tubeimoside I co-treated with Cisplatin] results in increased expression of BAX protein	affects^cotreatment|increases^expression	21687949
cisplatin	Cisplatin	D002945	15663-27-1	BAX	581	Homo sapiens	9606	[YAP1 protein promotes the reaction [[Cisplatin co-treated with 2,5,7,8-tetramethyl-2R-(4R,8R,12-trimethyltridecyl)chroman-6-yloxy acetic acid] results in increased expression of TP73 protein]] which results in increased expression of BAX protein	affects^cotreatment|increases^expression|increases^reaction	21214929
cisplatin	Cisplatin	D002945	15663-27-1	BBC3	27113	Homo sapiens	9606	2,2-bis(hydroxymethyl)-1-azabicyclo(2,2,2,)octan-3-one promotes the reaction [Cisplatin results in increased expression of BBC3 mRNA]	increases^expression|increases^reaction	21109480
cisplatin	Cisplatin	D002945	15663-27-1	BBC3	27113	Homo sapiens	9606	BBC3 protein results in increased susceptibility to Cisplatin	increases^response to substance	16481741|21339993|21532991
cisplatin	Cisplatin	D002945	15663-27-1	BBC3	27113	Homo sapiens	9606	Cisplatin inhibits the reaction [[HDAC1 protein co-treated with TP63 protein modified form] binds to BBC3 promoter]	affects^binding|affects^cotreatment|decreases^reaction	21527555
cisplatin	Cisplatin	D002945	15663-27-1	BBC3	27113	Homo sapiens	9606	Cisplatin promotes the reaction [TP53 protein results in increased expression of BBC3 mRNA]	increases^expression|increases^reaction	21532991
cisplatin	Cisplatin	D002945	15663-27-1	BBC3	27113	Homo sapiens	9606	Cisplatin results in increased expression of BBC3 mRNA	increases^expression	16481741|21109480|21527555|21532991
cisplatin	Cisplatin	D002945	15663-27-1	BBC3	27113	Homo sapiens	9606	Cisplatin results in increased expression of BBC3 protein	increases^expression	16481741|21285353|21339993|21516125
cisplatin	Cisplatin	D002945	15663-27-1	BBC3	27113	Homo sapiens	9606	MSH2 protein promotes the reaction [Cisplatin results in increased expression of BBC3 protein]	increases^expression|increases^reaction	21285353
cisplatin	Cisplatin	D002945	15663-27-1	BBC3	27113	Homo sapiens	9606	nutlin 3 promotes the reaction [Cisplatin results in increased expression of BBC3 mRNA]	increases^expression|increases^reaction	21109480
cisplatin	Cisplatin	D002945	15663-27-1	BBC3	27113	Homo sapiens	9606	[[Sirolimus co-treated with Cisplatin] results in increased expression of TP73 protein] which results in increased expression of BBC3 protein	affects^cotreatment|increases^expression	20686837
cisplatin	Cisplatin	D002945	15663-27-1	BBC3	27113	Homo sapiens	9606	[SNAI2 protein results in decreased expression of BBC3 protein] which results in decreased susceptibility to Cisplatin	decreases^expression|decreases^response to substance	21339993
cisplatin	Cisplatin	D002945	15663-27-1	BBC3	27113	Homo sapiens	9606	TP73 protein modified form promotes the reaction [Cisplatin results in increased expression of BBC3 protein]	increases^expression|increases^reaction	21516125
cisplatin	Cisplatin	D002945	15663-27-1	BBC3	27113	Homo sapiens	9606	Tretinoin inhibits the reaction [Cisplatin results in increased expression of BBC3 mRNA]	decreases^reaction|increases^expression	21532991
cisplatin	Cisplatin	D002945	15663-27-1	BCAM	4059	Homo sapiens	9606	BCAM protein affects the susceptibility to Cisplatin	affects^response to substance	16217747
cisplatin	Cisplatin	D002945	15663-27-1	BCAR1	9564	Homo sapiens	9606	BCAR1 protein results in increased susceptibility to Cisplatin	increases^response to substance	21291860|21720550
cisplatin	Cisplatin	D002945	15663-27-1	BCAR3	8412	Homo sapiens	9606	Cisplatin affects the reaction [Piroxicam results in decreased expression of BCAR3 mRNA]	affects^reaction|decreases^expression	21858171
cisplatin	Cisplatin	D002945	15663-27-1	BCAR3	8412	Homo sapiens	9606	Cisplatin results in decreased expression of BCAR3 mRNA	decreases^expression	19561079
cisplatin	Cisplatin	D002945	15663-27-1	BCAS4	55653	Homo sapiens	9606	BCAS4 protein affects the susceptibility to Cisplatin	affects^response to substance	16217747
cisplatin	Cisplatin	D002945	15663-27-1	BCCIP	56647	Homo sapiens	9606	Cisplatin promotes the reaction [Piroxicam results in decreased expression of BCCIP mRNA]	decreases^expression|increases^reaction	21858171
cisplatin	Cisplatin	D002945	15663-27-1	BCL2	596	Homo sapiens	9606	ABCB1 protein inhibits the reaction [Cisplatin results in decreased expression of BCL2 protein]	decreases^expression|decreases^reaction	22269388
cisplatin	Cisplatin	D002945	15663-27-1	BCL2	596	Homo sapiens	9606	BCL2 inhibits the reaction [Cisplatin results in increased cleavage of CASP3 protein]	decreases^reaction|increases^cleavage	21618512
cisplatin	Cisplatin	D002945	15663-27-1	BCL2	596	Homo sapiens	9606	BCL2 inhibits the reaction [Cisplatin results in increased cleavage of CASP9 protein]	decreases^reaction|increases^cleavage	21618512
cisplatin	Cisplatin	D002945	15663-27-1	BCL2	596	Homo sapiens	9606	BCL2 inhibits the reaction [Cisplatin results in increased cleavage of PARP1 protein]	decreases^reaction|increases^cleavage	21618512
cisplatin	Cisplatin	D002945	15663-27-1	BCL2	596	Homo sapiens	9606	BCL2 protein inhibits the reaction [Cisplatin affects the localization of BAX protein]	affects^localization|decreases^reaction	16009487
cisplatin	Cisplatin	D002945	15663-27-1	BCL2	596	Homo sapiens	9606	BCL2 protein inhibits the reaction [[Cisplatin co-treated with FASLG protein] results in increased activity of CASP3 protein]	affects^cotreatment|decreases^reaction|increases^activity	17574045
cisplatin	Cisplatin	D002945	15663-27-1	BCL2	596	Homo sapiens	9606	BCL2 protein inhibits the reaction [[Cisplatin co-treated with FASLG protein] results in increased activity of CASP8 protein]	affects^cotreatment|decreases^reaction|increases^activity	17574045
cisplatin	Cisplatin	D002945	15663-27-1	BCL2	596	Homo sapiens	9606	BCL2 protein inhibits the reaction [[Cisplatin co-treated with FASLG protein] results in increased activity of CASP9 protein]	affects^cotreatment|decreases^reaction|increases^activity	17574045
cisplatin	Cisplatin	D002945	15663-27-1	BCL2	596	Homo sapiens	9606	BCL2 protein results in decreased susceptibility to Cisplatin	decreases^response to substance	16009487|20162574|21160028
cisplatin	Cisplatin	D002945	15663-27-1	BCL2	596	Homo sapiens	9606	BCL2 protein results in decreased susceptibility to [Cisplatin co-treated with Etoposide]	affects^cotreatment|decreases^response to substance	15917659
cisplatin	Cisplatin	D002945	15663-27-1	BCL2	596	Homo sapiens	9606	BCL2 results in decreased susceptibility to Cisplatin	decreases^response to substance	10896673|21618512
cisplatin	Cisplatin	D002945	15663-27-1	BCL2	596	Homo sapiens	9606	[[Cisplatin co-treated with 2,5,7,8-tetramethyl-2R-(4R,8R,12-trimethyltridecyl)chroman-6-yloxy acetic acid] results in increased expression of TP73 protein] which results in decreased expression of BCL2 mRNA	affects^cotreatment|decreases^expression|increases^expression	21214929
cisplatin	Cisplatin	D002945	15663-27-1	BCL2	596	Homo sapiens	9606	[[Cisplatin co-treated with 2,5,7,8-tetramethyl-2R-(4R,8R,12-trimethyltridecyl)chroman-6-yloxy acetic acid] results in increased expression of TP73 protein] which results in decreased expression of BCL2 protein	affects^cotreatment|decreases^expression|increases^expression	21214929
cisplatin	Cisplatin	D002945	15663-27-1	BCL2	596	Homo sapiens	9606	[[[Cisplatin co-treated with 2,5,7,8-tetramethyl-2R-(4R,8R,12-trimethyltridecyl)chroman-6-yloxy acetic acid] results in increased phosphorylation of ABL1 protein] which results in increased expression of TP73 protein] which results in decreased expression of BCL2 protein	affects^cotreatment|decreases^expression|increases^expression|increases^phosphorylation	21214929
cisplatin	Cisplatin	D002945	15663-27-1	BCL2	596	Homo sapiens	9606	[Cisplatin co-treated with pemetrexed co-treated with Valproic Acid] results in decreased expression of BCL2 protein	affects^cotreatment|decreases^expression	19351772
cisplatin	Cisplatin	D002945	15663-27-1	BCL2	596	Homo sapiens	9606	[Cisplatin co-treated with pemetrexed co-treated with vorinostat] results in decreased expression of BCL2 protein	affects^cotreatment|decreases^expression	19351772
cisplatin	Cisplatin	D002945	15663-27-1	BCL2	596	Homo sapiens	9606	Cisplatin promotes the reaction [Metformin results in decreased expression of BCL2 protein]	decreases^expression|increases^reaction	21388661
cisplatin	Cisplatin	D002945	15663-27-1	BCL2	596	Homo sapiens	9606	Cisplatin results in decreased expression of BCL2 mRNA	decreases^expression	17404015|20878077
cisplatin	Cisplatin	D002945	15663-27-1	BCL2	596	Homo sapiens	9606	Cisplatin results in decreased expression of BCL2 protein	decreases^expression	10891529|14512787|20209498|20674069|21052098|21420390|21940343|9664115
cisplatin	Cisplatin	D002945	15663-27-1	BCL2	596	Homo sapiens	9606	[Cisplatin results in decreased susceptibility to Cisplatin] which results in increased expression of BCL2 protein	decreases^response to substance|increases^expression	21130731
cisplatin	Cisplatin	D002945	15663-27-1	BCL2	596	Homo sapiens	9606	Cisplatin results in increased expression of BCL2 protein	increases^expression	17619073
cisplatin	Cisplatin	D002945	15663-27-1	BCL2	596	Homo sapiens	9606	[Cisplatin results in increased expression of MIR630] which results in decreased expression of BCL2 mRNA	decreases^expression|increases^expression	21274007
cisplatin	Cisplatin	D002945	15663-27-1	BCL2	596	Homo sapiens	9606	Dexamethasone inhibits the reaction [Cisplatin results in decreased expression of BCL2 mRNA]	decreases^expression|decreases^reaction	21940343
cisplatin	Cisplatin	D002945	15663-27-1	BCL2	596	Homo sapiens	9606	Dexamethasone inhibits the reaction [Cisplatin results in decreased expression of BCL2 protein]	decreases^expression|decreases^reaction	21940343
cisplatin	Cisplatin	D002945	15663-27-1	BCL2	596	Homo sapiens	9606	[IL8 results in increased expression of BCL2 mRNA] which results in decreased susceptibility to Cisplatin	decreases^response to substance|increases^expression	21742513
cisplatin	Cisplatin	D002945	15663-27-1	BCL2	596	Homo sapiens	9606	[IL8 results in increased expression of BCL2 protein] which results in decreased susceptibility to Cisplatin	decreases^response to substance|increases^expression	21742513
cisplatin	Cisplatin	D002945	15663-27-1	BCL2	596	Homo sapiens	9606	ING4 protein promotes the reaction [Cisplatin results in decreased expression of BCL2 protein]	decreases^expression|increases^reaction	21052098
cisplatin	Cisplatin	D002945	15663-27-1	BCL2	596	Homo sapiens	9606	[MIR497 results in decreased expression of BCL2 protein] which results in increased susceptibility to Cisplatin	decreases^expression|increases^response to substance	21258880
cisplatin	Cisplatin	D002945	15663-27-1	BCL2	596	Homo sapiens	9606	Noscapine promotes the reaction [Cisplatin results in decreased expression of BCL2 protein]	decreases^expression|increases^reaction	20674069
cisplatin	Cisplatin	D002945	15663-27-1	BCL2	596	Homo sapiens	9606	[Paclitaxel results in increased phosphorylation of BCL2 protein] which results in increased susceptibility to Cisplatin	increases^phosphorylation|increases^response to substance	12709826
cisplatin	Cisplatin	D002945	15663-27-1	BCL2	596	Homo sapiens	9606	[Quercetin results in increased susceptibility to Cisplatin] which results in decreased expression of BCL2 protein	decreases^expression|increases^response to substance	16619537
cisplatin	Cisplatin	D002945	15663-27-1	BCL2	596	Homo sapiens	9606	[Theophylline co-treated with Cisplatin] results in decreased expression of BCL2 protein	affects^cotreatment|decreases^expression	10891529|15645133
cisplatin	Cisplatin	D002945	15663-27-1	BCL2	596	Homo sapiens	9606	[TNFSF10 protein co-treated with Cisplatin] results in decreased expression of BCL2 protein	affects^cotreatment|decreases^expression	21252285
cisplatin	Cisplatin	D002945	15663-27-1	BCL2	596	Homo sapiens	9606	[tubeimoside I co-treated with Cisplatin] results in decreased expression of BCL2 protein	affects^cotreatment|decreases^expression	21687949
cisplatin	Cisplatin	D002945	15663-27-1	BCL2	596	Homo sapiens	9606	Y 27632 inhibits the reaction [Cisplatin results in decreased expression of BCL2 mRNA]	decreases^expression|decreases^reaction	20878077
cisplatin	Cisplatin	D002945	15663-27-1	BCL2	596	Homo sapiens	9606	[YAP1 protein promotes the reaction [[Cisplatin co-treated with 2,5,7,8-tetramethyl-2R-(4R,8R,12-trimethyltridecyl)chroman-6-yloxy acetic acid] results in increased expression of TP73 protein]] which results in decreased expression of BCL2 protein	affects^cotreatment|decreases^expression|increases^expression|increases^reaction	21214929
cisplatin	Cisplatin	D002945	15663-27-1	BCL2A1	597	Homo sapiens	9606	Cisplatin results in increased expression of BCL2A1 mRNA	increases^expression	19561079
cisplatin	Cisplatin	D002945	15663-27-1	BCL2L1	598	Homo sapiens	9606	BCL2L1 protein results in decreased susceptibility to Cisplatin	decreases^response to substance	16020667
cisplatin	Cisplatin	D002945	15663-27-1	BCL2L1	598	Homo sapiens	9606	BCL2L1 protein results in decreased susceptibility to [Cisplatin co-treated with Etoposide]	affects^cotreatment|decreases^response to substance	15917659
cisplatin	Cisplatin	D002945	15663-27-1	BCL2L1	598	Homo sapiens	9606	BCL2L1 results in decreased susceptibility to Cisplatin	decreases^response to substance	21849418
cisplatin	Cisplatin	D002945	15663-27-1	BCL2L1	598	Homo sapiens	9606	Cisplatin promotes the reaction [Metformin results in decreased expression of BCL2L1 protein]	decreases^expression|increases^reaction	21388661
cisplatin	Cisplatin	D002945	15663-27-1	BCL2L1	598	Homo sapiens	9606	Cisplatin results in decreased expression of BCL2L1 mRNA	decreases^expression	21737676|21940343
cisplatin	Cisplatin	D002945	15663-27-1	BCL2L1	598	Homo sapiens	9606	Cisplatin results in decreased expression of BCL2L1 protein	decreases^expression	17399942|21052098|21737676|21940343
cisplatin	Cisplatin	D002945	15663-27-1	BCL2L1	598	Homo sapiens	9606	Cisplatin results in increased degradation of BCL2L1 protein	increases^degradation	21821001
cisplatin	Cisplatin	D002945	15663-27-1	BCL2L1	598	Homo sapiens	9606	Cisplatin results in increased expression of BCL2L1 protein	increases^expression	17619073
cisplatin	Cisplatin	D002945	15663-27-1	BCL2L1	598	Homo sapiens	9606	Dexamethasone inhibits the reaction [Cisplatin results in decreased expression of BCL2L1 mRNA]	decreases^expression|decreases^reaction	21940343
cisplatin	Cisplatin	D002945	15663-27-1	BCL2L1	598	Homo sapiens	9606	Dexamethasone inhibits the reaction [Cisplatin results in decreased expression of BCL2L1 protein]	decreases^expression|decreases^reaction	21940343
cisplatin	Cisplatin	D002945	15663-27-1	BCL2L1	598	Homo sapiens	9606	[IL8 results in increased expression of BCL2L1 mRNA] which results in decreased susceptibility to Cisplatin	decreases^response to substance|increases^expression	21742513
cisplatin	Cisplatin	D002945	15663-27-1	BCL2L1	598	Homo sapiens	9606	[IL8 results in increased expression of BCL2L1 protein] which results in decreased susceptibility to Cisplatin	decreases^response to substance|increases^expression	21742513
cisplatin	Cisplatin	D002945	15663-27-1	BCL2L1	598	Homo sapiens	9606	ING4 protein promotes the reaction [Cisplatin results in decreased expression of BCL2L1 protein]	decreases^expression|increases^reaction	21052098
cisplatin	Cisplatin	D002945	15663-27-1	BCL2L1	598	Homo sapiens	9606	LGALS3 inhibits the reaction [Cisplatin results in increased degradation of BCL2L1 protein]	decreases^reaction|increases^degradation	21821001
cisplatin	Cisplatin	D002945	15663-27-1	BCL2L1	598	Homo sapiens	9606	[Quercetin results in increased susceptibility to Cisplatin] which results in decreased expression of BCL2L1 protein	decreases^expression|increases^response to substance	16619537
cisplatin	Cisplatin	D002945	15663-27-1	BCL2L1	598	Homo sapiens	9606	RELA protein mutant form inhibits the reaction [Cisplatin results in decreased expression of BCL2L1 mRNA]	decreases^expression|decreases^reaction	21737676
cisplatin	Cisplatin	D002945	15663-27-1	BCL2L1	598	Homo sapiens	9606	RELA protein mutant form inhibits the reaction [Cisplatin results in decreased expression of BCL2L1 protein]	decreases^expression|decreases^reaction	21737676
cisplatin	Cisplatin	D002945	15663-27-1	BCL2L1	598	Homo sapiens	9606	[TNFSF10 protein co-treated with Cisplatin] results in decreased expression of BCL2L1 protein	affects^cotreatment|decreases^expression	21252285
cisplatin	Cisplatin	D002945	15663-27-1	BCL2L11	10018	Homo sapiens	9606	[Cisplatin inhibits the reaction [[Sirolimus results in increased phosphorylation of AKT1 protein] which results in increased phosphorylation of FOXO3A protein]] which results in increased expression of BCL2L11 protein	decreases^reaction|increases^expression|increases^phosphorylation	21092744
cisplatin	Cisplatin	D002945	15663-27-1	BCL2L11	10018	Homo sapiens	9606	Cisplatin results in increased expression of BCL2L11 mRNA	increases^expression	21092744
cisplatin	Cisplatin	D002945	15663-27-1	BCL2L11	10018	Homo sapiens	9606	Sirolimus promotes the reaction [Cisplatin results in increased expression of BCL2L11 mRNA]	increases^expression|increases^reaction	21092744
cisplatin	Cisplatin	D002945	15663-27-1	BCL2L12	83596	Homo sapiens	9606	Cisplatin results in decreased expression of BCL2L12 mRNA	decreases^expression	17404015
cisplatin	Cisplatin	D002945	15663-27-1	BCL2L2	599	Homo sapiens	9606	[Cisplatin results in increased expression of MIR630] which results in decreased expression of BCL2L2 mRNA	decreases^expression|increases^expression	21274007
cisplatin	Cisplatin	D002945	15663-27-1	BCL6	604	Homo sapiens	9606	Cisplatin results in increased expression of BCL6 mRNA	increases^expression	21532991
cisplatin	Cisplatin	D002945	15663-27-1	BCLAF1	9774	Homo sapiens	9606	[Piroxicam co-treated with Cisplatin] results in decreased expression of BCLAF1 mRNA	affects^cotreatment|decreases^expression	21858171
cisplatin	Cisplatin	D002945	15663-27-1	BECN1	8678	Homo sapiens	9606	BECN1 affects the reaction [NACC1 affects the susceptibility to Cisplatin]	affects^reaction|affects^response to substance	21743489
cisplatin	Cisplatin	D002945	15663-27-1	BHLHE41	79365	Homo sapiens	9606	[Cisplatin co-treated with panobinostat] affects the expression of BHLHE41 mRNA	affects^cotreatment|affects^expression	21791302
cisplatin	Cisplatin	D002945	15663-27-1	BID	637	Homo sapiens	9606	Acetylcysteine inhibits the reaction [[Cisplatin co-treated with FASLG protein] results in decreased expression of BID protein]	affects^cotreatment|decreases^expression|decreases^reaction	17574045
cisplatin	Cisplatin	D002945	15663-27-1	BID	637	Homo sapiens	9606	[Cisplatin co-treated with FASLG protein] results in decreased expression of BID protein	affects^cotreatment|decreases^expression	17574045
cisplatin	Cisplatin	D002945	15663-27-1	BID	637	Homo sapiens	9606	[Cisplatin co-treated with fisetin] results in increased cleavage of BID protein	affects^cotreatment|increases^cleavage	21216935
cisplatin	Cisplatin	D002945	15663-27-1	BID	637	Homo sapiens	9606	[Cisplatin co-treated with pemetrexed] results in increased cleavage of BID protein	affects^cotreatment|increases^cleavage	19351772
cisplatin	Cisplatin	D002945	15663-27-1	BID	637	Homo sapiens	9606	Cisplatin inhibits the reaction [CASP8 protein results in increased cleavage of BID protein]	decreases^reaction|increases^cleavage	19590723
cisplatin	Cisplatin	D002945	15663-27-1	BID	637	Homo sapiens	9606	Cisplatin results in increased activity of BID protein	increases^activity	21052098|21527773
cisplatin	Cisplatin	D002945	15663-27-1	BID	637	Homo sapiens	9606	[TNFSF10 protein co-treated with Cisplatin] results in increased cleavage of BID protein	affects^cotreatment|increases^cleavage	21252285
cisplatin	Cisplatin	D002945	15663-27-1	BIK	638	Homo sapiens	9606	Cisplatin results in increased expression of BIK mRNA	increases^expression	20878077
cisplatin	Cisplatin	D002945	15663-27-1	BIK	638	Homo sapiens	9606	Y 27632 inhibits the reaction [Cisplatin results in increased expression of BIK mRNA]	decreases^reaction|increases^expression	20878077
cisplatin	Cisplatin	D002945	15663-27-1	BIN1	274	Homo sapiens	9606	[BIN1 protein results in decreased activity of PARP1 protein] which results in increased susceptibility to Cisplatin	decreases^activity|increases^response to substance	21447800
cisplatin	Cisplatin	D002945	15663-27-1	BIN1	274	Homo sapiens	9606	BIN1 protein results in increased susceptibility to Cisplatin	increases^response to substance	21447800
cisplatin	Cisplatin	D002945	15663-27-1	BIRC2	329	Homo sapiens	9606	BIRC2 protein results in decreased susceptibility to Cisplatin	decreases^response to substance	10815900|14654915|16142363
cisplatin	Cisplatin	D002945	15663-27-1	BIRC3	330	Homo sapiens	9606	BIRC3 protein results in decreased susceptibility to Cisplatin	decreases^response to substance	14654915
cisplatin	Cisplatin	D002945	15663-27-1	BIRC3	330	Homo sapiens	9606	Cisplatin results in decreased expression of BIRC3 protein	decreases^expression	16391810
cisplatin	Cisplatin	D002945	15663-27-1	BIRC5	332	Homo sapiens	9606	BIRC5 protein results in decreased susceptibility to Cisplatin	decreases^response to substance	11911975|14654915|15981204|16142363|17686279
cisplatin	Cisplatin	D002945	15663-27-1	BIRC5	332	Homo sapiens	9606	BIRC5 protein results in decreased susceptibility to [Cisplatin co-treated with Etoposide]	affects^cotreatment|decreases^response to substance	15917659|16382892
cisplatin	Cisplatin	D002945	15663-27-1	BIRC5	332	Homo sapiens	9606	[Cisplatin co-treated with fisetin] results in decreased expression of BIRC5 protein	affects^cotreatment|decreases^expression	21216935
cisplatin	Cisplatin	D002945	15663-27-1	BIRC5	332	Homo sapiens	9606	Cisplatin inhibits the reaction [Piroxicam results in increased expression of BIRC5 mRNA]	decreases^reaction|increases^expression	21858171
cisplatin	Cisplatin	D002945	15663-27-1	BIRC5	332	Homo sapiens	9606	Cisplatin results in decreased expression of BIRC5 mRNA	decreases^expression	11911975|15970709|20623264
cisplatin	Cisplatin	D002945	15663-27-1	BIRC5	332	Homo sapiens	9606	Cisplatin results in decreased expression of BIRC5 protein	decreases^expression	20674069
cisplatin	Cisplatin	D002945	15663-27-1	BIRC5	332	Homo sapiens	9606	Cisplatin results in increased expression of and results in increased phosphorylation of BIRC5 protein	increases^expression|increases^phosphorylation	15981204
cisplatin	Cisplatin	D002945	15663-27-1	BIRC5	332	Homo sapiens	9606	Cisplatin results in increased expression of BIRC5 mRNA	increases^expression	15981204|21165580
cisplatin	Cisplatin	D002945	15663-27-1	BIRC5	332	Homo sapiens	9606	Cisplatin results in increased expression of BIRC5 protein	increases^expression	14988404|17399942
cisplatin	Cisplatin	D002945	15663-27-1	BIRC5	332	Homo sapiens	9606	Noscapine promotes the reaction [Cisplatin results in decreased expression of BIRC5 protein]	decreases^expression|increases^reaction	20674069
cisplatin	Cisplatin	D002945	15663-27-1	BIRC5	332	Homo sapiens	9606	tanshinone inhibits the reaction [Cisplatin results in increased expression of BIRC5 mRNA]	decreases^reaction|increases^expression	21165580
cisplatin	Cisplatin	D002945	15663-27-1	BIRC5	332	Homo sapiens	9606	[TNFSF10 protein co-treated with Cisplatin] results in decreased expression of BIRC5 protein	affects^cotreatment|decreases^expression	21252285
cisplatin	Cisplatin	D002945	15663-27-1	BIRC6	57448	Homo sapiens	9606	BIRC6 results in decreased susceptibility to Cisplatin	decreases^response to substance	21542283
cisplatin	Cisplatin	D002945	15663-27-1	BLCAP	10904	Homo sapiens	9606	Cisplatin results in increased expression of BLCAP mRNA	increases^expression	19561079
cisplatin	Cisplatin	D002945	15663-27-1	BLOC1S2	282991	Homo sapiens	9606	Cisplatin results in decreased expression of BLOC1S2 mRNA	decreases^expression	19561079
cisplatin	Cisplatin	D002945	15663-27-1	BMI1	648	Homo sapiens	9606	BMI1 inhibits the reaction [Cisplatin results in increased cleavage of CASP8 protein]	decreases^reaction|increases^cleavage	21445297
cisplatin	Cisplatin	D002945	15663-27-1	BMI1	648	Homo sapiens	9606	BMI1 inhibits the reaction [Cisplatin results in increased phosphorylation of CHEK2 protein]	decreases^reaction|increases^phosphorylation	21445297
cisplatin	Cisplatin	D002945	15663-27-1	BMI1	648	Homo sapiens	9606	BMI1 inhibits the reaction [Cisplatin results in increased phosphorylation of H2AFX protein]	decreases^reaction|increases^phosphorylation	21445297
cisplatin	Cisplatin	D002945	15663-27-1	BMI1	648	Homo sapiens	9606	BMI1 protein inhibits the reaction [Cisplatin results in increased abundance of Reactive Oxygen Species]	decreases^reaction|increases^abundance	21445297
cisplatin	Cisplatin	D002945	15663-27-1	BMI1	648	Homo sapiens	9606	BMI1 protein inhibits the reaction [Cisplatin results in increased activity of CASP3 protein]	decreases^reaction|increases^activity	21311599
cisplatin	Cisplatin	D002945	15663-27-1	BMI1	648	Homo sapiens	9606	BMI1 protein inhibits the reaction [Cisplatin results in increased activity of CASP9 protein]	decreases^reaction|increases^activity	21311599
cisplatin	Cisplatin	D002945	15663-27-1	BMI1	648	Homo sapiens	9606	BMI1 protein results in decreased susceptibility to Cisplatin	decreases^response to substance	21311599|21445297
cisplatin	Cisplatin	D002945	15663-27-1	BMI1	648	Homo sapiens	9606	[Cisplatin results in decreased susceptibility to Cisplatin] which results in increased expression of BMI1 mRNA	decreases^response to substance|increases^expression	21342274
cisplatin	Cisplatin	D002945	15663-27-1	BMI1	648	Homo sapiens	9606	[Cisplatin results in decreased susceptibility to Cisplatin] which results in increased expression of BMI1 protein	decreases^response to substance|increases^expression	21342274
cisplatin	Cisplatin	D002945	15663-27-1	BMP4	652	Homo sapiens	9606	Cisplatin results in increased expression of BMP4 mRNA	increases^expression	21674241
cisplatin	Cisplatin	D002945	15663-27-1	BMP7	655	Homo sapiens	9606	BMP7 protein affects the susceptibility to Cisplatin	affects^response to substance	16217747
cisplatin	Cisplatin	D002945	15663-27-1	BRCA1	672	Homo sapiens	9606	BRCA1 mutant form promotes the reaction [RRM2 mutant form promotes the reaction [TP53 mutant form promotes the reaction [Cisplatin results in increased activity of and results in increased phosphorylation of CHEK1 protein]]]	increases^activity|increases^phosphorylation|increases^reaction	21875941
cisplatin	Cisplatin	D002945	15663-27-1	BRCA1	672	Homo sapiens	9606	BRCA1 mutant form promotes the reaction [RRM2 mutant form promotes the reaction [TP53 mutant form promotes the reaction [Cisplatin results in increased phosphorylation of H2AFX protein]]]	increases^phosphorylation|increases^reaction	21875941
cisplatin	Cisplatin	D002945	15663-27-1	BRCA1	672	Homo sapiens	9606	BRCA1 mutant form promotes the reaction [RRM2 mutant form promotes the reaction [TP53 mutant form results in increased susceptibility to Cisplatin]]	increases^reaction|increases^response to substance	21875941
cisplatin	Cisplatin	D002945	15663-27-1	BRCA1	672	Homo sapiens	9606	BRCA1 protein results in decreased susceptibility to Cisplatin	decreases^response to substance	20603439
cisplatin	Cisplatin	D002945	15663-27-1	BRCA1	672	Homo sapiens	9606	BRCA1 results in decreased susceptibility to Cisplatin	decreases^response to substance	21633166|21854619
cisplatin	Cisplatin	D002945	15663-27-1	BRCA1	672	Homo sapiens	9606	Cisplatin results in decreased activity of BRCA1 protein	decreases^activity	20878461
cisplatin	Cisplatin	D002945	15663-27-1	BRCA1	672	Homo sapiens	9606	Cisplatin results in increased expression of BRCA1 mRNA	increases^expression	20623183
cisplatin	Cisplatin	D002945	15663-27-1	BRCA1	672	Homo sapiens	9606	Cisplatin results in increased expression of BRCA1 protein	increases^expression	20623183
cisplatin	Cisplatin	D002945	15663-27-1	BRCA1	672	Homo sapiens	9606	ESR2 protein inhibits the reaction [Cisplatin results in increased expression of BRCA1 mRNA]	decreases^reaction|increases^expression	20623183
cisplatin	Cisplatin	D002945	15663-27-1	BRCA1	672	Homo sapiens	9606	ESR2 protein inhibits the reaction [Cisplatin results in increased expression of BRCA1 protein]	decreases^reaction|increases^expression	20623183
cisplatin	Cisplatin	D002945	15663-27-1	BRCA1	672	Homo sapiens	9606	vorinostat inhibits the reaction [BRCA1 results in decreased susceptibility to Cisplatin]	decreases^reaction|decreases^response to substance	21854619
cisplatin	Cisplatin	D002945	15663-27-1	BRCA2	675	Homo sapiens	9606	BRCA2 protein results in decreased susceptibility to Cisplatin	decreases^response to substance	21385444
cisplatin	Cisplatin	D002945	15663-27-1	BRCA2	675	Homo sapiens	9606	BRCA2 results in decreased susceptibility to Cisplatin	decreases^response to substance	21633166
cisplatin	Cisplatin	D002945	15663-27-1	BRD2	6046	Homo sapiens	9606	Cisplatin results in increased expression of BRD2 mRNA	increases^expression	19561079
cisplatin	Cisplatin	D002945	15663-27-1	BRIP1	83990	Homo sapiens	9606	BRIP1 protein results in decreased susceptibility to Cisplatin	decreases^response to substance	21115814
cisplatin	Cisplatin	D002945	15663-27-1	BRMS1	25855	Homo sapiens	9606	[Piroxicam co-treated with Cisplatin] results in decreased expression of BRMS1 mRNA	affects^cotreatment|decreases^expression	21858171
cisplatin	Cisplatin	D002945	15663-27-1	BSG	682	Homo sapiens	9606	[BSG binds to PPIA] which results in decreased susceptibility to Cisplatin	affects^binding|decreases^response to substance	21956400
cisplatin	Cisplatin	D002945	15663-27-1	BSG	682	Homo sapiens	9606	[[BSG binds to PPIA] which results in decreased susceptibility to Cisplatin] which results in increased expression of MMP9	affects^binding|decreases^response to substance|increases^expression	21956400
cisplatin	Cisplatin	D002945	15663-27-1	BSG	682	Homo sapiens	9606	BSG protein results in decreased susceptibility to Cisplatin	decreases^response to substance	21165561
cisplatin	Cisplatin	D002945	15663-27-1	BTG1	694	Homo sapiens	9606	Cisplatin affects the reaction [Piroxicam results in decreased expression of BTG1 mRNA]	affects^reaction|decreases^expression	21858171
cisplatin	Cisplatin	D002945	15663-27-1	BTG1	694	Homo sapiens	9606	Cisplatin results in increased expression of BTG1 mRNA	increases^expression	19561079
cisplatin	Cisplatin	D002945	15663-27-1	BTG2	7832	Homo sapiens	9606	BTG2 protein affects the susceptibility to Cisplatin	affects^response to substance	16217747
cisplatin	Cisplatin	D002945	15663-27-1	BTG2	7832	Homo sapiens	9606	Cisplatin results in increased expression of BTG2 mRNA	increases^expression	19561079|21532991
cisplatin	Cisplatin	D002945	15663-27-1	BUB1	699	Homo sapiens	9606	[Piroxicam co-treated with Cisplatin] results in decreased expression of BUB1 mRNA	affects^cotreatment|decreases^expression	21858171
cisplatin	Cisplatin	D002945	15663-27-1	BUB1B	701	Homo sapiens	9606	Cisplatin inhibits the reaction [Piroxicam results in decreased expression of BUB1B mRNA]	decreases^expression|decreases^reaction	21858171
cisplatin	Cisplatin	D002945	15663-27-1	C11ORF68	83638	Homo sapiens	9606	C11ORF68 protein affects the susceptibility to Cisplatin	affects^response to substance	16217747
cisplatin	Cisplatin	D002945	15663-27-1	C11ORF82	220042	Homo sapiens	9606	Cisplatin results in decreased expression of C11ORF82 mRNA	decreases^expression	19561079
cisplatin	Cisplatin	D002945	15663-27-1	C11ORF9	745	Homo sapiens	9606	C11ORF9 protein affects the susceptibility to Cisplatin	affects^response to substance	16217747
cisplatin	Cisplatin	D002945	15663-27-1	C12ORF45	121053	Homo sapiens	9606	Cisplatin results in increased expression of C12ORF45 mRNA	increases^expression	19561079
cisplatin	Cisplatin	D002945	15663-27-1	C12ORF5	57103	Homo sapiens	9606	Cisplatin results in increased expression of C12ORF5 mRNA	increases^expression	21532991
cisplatin	Cisplatin	D002945	15663-27-1	C16ORF91	283951	Homo sapiens	9606	Cisplatin results in increased expression of C16ORF91 mRNA	increases^expression	19561079
cisplatin	Cisplatin	D002945	15663-27-1	C1D	10438	Homo sapiens	9606	[Piroxicam co-treated with Cisplatin] results in decreased expression of C1D mRNA	affects^cotreatment|decreases^expression	21858171
cisplatin	Cisplatin	D002945	15663-27-1	C1ORF63	57035	Homo sapiens	9606	Cisplatin results in increased expression of C1ORF63 mRNA	increases^expression	21603599
cisplatin	Cisplatin	D002945	15663-27-1	C21ORF91	54149	Homo sapiens	9606	Cisplatin results in increased expression of C21ORF91 mRNA	increases^expression	19561079
cisplatin	Cisplatin	D002945	15663-27-1	C3	718	Homo sapiens	9606	[Cisplatin co-treated with panobinostat] affects the expression of C3 mRNA	affects^cotreatment|affects^expression	21791302
cisplatin	Cisplatin	D002945	15663-27-1	C3ORF52	79669	Homo sapiens	9606	Cisplatin results in increased expression of C3ORF52 mRNA	increases^expression	19561079
cisplatin	Cisplatin	D002945	15663-27-1	C4ORF29	80167	Homo sapiens	9606	C4ORF29 protein affects the susceptibility to Cisplatin	affects^response to substance	16217747
cisplatin	Cisplatin	D002945	15663-27-1	CA2	760	Homo sapiens	9606	CA2 protein affects the susceptibility to Cisplatin	affects^response to substance	16217747
cisplatin	Cisplatin	D002945	15663-27-1	CACYBP	27101	Homo sapiens	9606	Cisplatin inhibits the reaction [Piroxicam results in decreased expression of CACYBP mRNA]	decreases^expression|decreases^reaction	21858171
cisplatin	Cisplatin	D002945	15663-27-1	CAD	790	Homo sapiens	9606	[Piroxicam co-treated with Cisplatin] results in decreased expression of CAD mRNA	affects^cotreatment|decreases^expression	21858171
cisplatin	Cisplatin	D002945	15663-27-1	CALCB	797	Homo sapiens	9606	CALCB protein affects the susceptibility to Cisplatin	affects^response to substance	16217747
cisplatin	Cisplatin	D002945	15663-27-1	CANX	821	Homo sapiens	9606	[Piroxicam co-treated with Cisplatin] results in increased expression of CANX mRNA	affects^cotreatment|increases^expression	21858171
cisplatin	Cisplatin	D002945	15663-27-1	CAPN1	823	Homo sapiens	9606	calpain inhibitor III inhibits the reaction [CAPN1 protein results in increased susceptibility to Cisplatin]	decreases^reaction|increases^response to substance	20878076
cisplatin	Cisplatin	D002945	15663-27-1	CAPN1	823	Homo sapiens	9606	CAPN1 protein results in increased susceptibility to Cisplatin	increases^response to substance	20878076
cisplatin	Cisplatin	D002945	15663-27-1	CAPN2	824	Homo sapiens	9606	CAPN2 protein promotes the reaction [GCS-100 inhibits the reaction [GAL3 protein results in increased susceptibility to Cisplatin]]	decreases^reaction|increases^reaction|increases^response to substance	21368866
cisplatin	Cisplatin	D002945	15663-27-1	CAPN2	824	Homo sapiens	9606	Cisplatin results in increased activity of CAPN2 protein	increases^activity	21368866
cisplatin	Cisplatin	D002945	15663-27-1	CAPN2	824	Homo sapiens	9606	GAL3 protein inhibits the reaction [Cisplatin results in increased activity of CAPN2 protein]	decreases^reaction|increases^activity	21368866
cisplatin	Cisplatin	D002945	15663-27-1	CAPN2	824	Homo sapiens	9606	PD 150606 inhibits the reaction [Cisplatin results in increased activity of CAPN2 protein]	decreases^reaction|increases^activity	21368866
cisplatin	Cisplatin	D002945	15663-27-1	CAPZA2	830	Homo sapiens	9606	Cisplatin inhibits the reaction [Piroxicam results in decreased expression of CAPZA2 mRNA]	decreases^expression|decreases^reaction	21858171
cisplatin	Cisplatin	D002945	15663-27-1	CASP12	100506742	Homo sapiens	9606	[vorinostat co-treated with Cisplatin] results in increased activity of CASP12 protein	affects^cotreatment|increases^activity	19280190
cisplatin	Cisplatin	D002945	15663-27-1	CASP2	835	Homo sapiens	9606	Cisplatin results in increased cleavage of CASP2 protein	increases^cleavage	10663630
cisplatin	Cisplatin	D002945	15663-27-1	CASP2	835	Homo sapiens	9606	Cisplatin results in increased expression of CASP2 protein	increases^expression	20623183
cisplatin	Cisplatin	D002945	15663-27-1	CASP2	835	Homo sapiens	9606	ESR2 protein promotes the reaction [Cisplatin results in increased expression of CASP2 protein]	increases^expression|increases^reaction	20623183
cisplatin	Cisplatin	D002945	15663-27-1	CASP3	836	Homo sapiens	9606	[4-methylene-2-octyl-5-oxofuran-3-carboxylic acid co-treated with Cisplatin] results in increased cleavage of and results in decreased expression of CASP3 protein	affects^cotreatment|decreases^expression|increases^cleavage	21442130
cisplatin	Cisplatin	D002945	15663-27-1	CASP3	836	Homo sapiens	9606	[4-methylene-2-octyl-5-oxofuran-3-carboxylic acid co-treated with Cisplatin] results in increased cleavage of and results in increased activity of CASP3 protein	affects^cotreatment|increases^activity|increases^cleavage	21442130
cisplatin	Cisplatin	D002945	15663-27-1	CASP3	836	Homo sapiens	9606	8-(4-chloro-phenylthio)-2'-O-methyladenosine-3'-5'-cyclic monophosphate inhibits the reaction [Cisplatin results in increased cleavage of and results in increased activity of CASP3 protein]	decreases^reaction|increases^activity|increases^cleavage	21745194
cisplatin	Cisplatin	D002945	15663-27-1	CASP3	836	Homo sapiens	9606	ABCB1 protein inhibits the reaction [Cisplatin results in increased activity of and results in increased cleavage of CASP3 protein]	decreases^reaction|increases^activity|increases^cleavage	22269388
cisplatin	Cisplatin	D002945	15663-27-1	CASP3	836	Homo sapiens	9606	Acetylcysteine inhibits the reaction [[Cisplatin co-treated with FASLG protein] results in increased activity of CASP3 protein]	affects^cotreatment|decreases^reaction|increases^activity	17574045
cisplatin	Cisplatin	D002945	15663-27-1	CASP3	836	Homo sapiens	9606	Acetylcysteine inhibits the reaction [Cisplatin results in increased activity of CASP3 protein]	decreases^reaction|increases^activity	21166495
cisplatin	Cisplatin	D002945	15663-27-1	CASP3	836	Homo sapiens	9606	Acetylcysteine inhibits the reaction [Cisplatin results in increased cleavage of CASP3 protein]	decreases^reaction|increases^cleavage	15496615
cisplatin	Cisplatin	D002945	15663-27-1	CASP3	836	Homo sapiens	9606	AKT1 protein inhibits the reaction [Cisplatin results in increased activity of CASP3 protein]	decreases^reaction|increases^activity	21266360
cisplatin	Cisplatin	D002945	15663-27-1	CASP3	836	Homo sapiens	9606	BCL2 inhibits the reaction [Cisplatin results in increased cleavage of CASP3 protein]	decreases^reaction|increases^cleavage	21618512
cisplatin	Cisplatin	D002945	15663-27-1	CASP3	836	Homo sapiens	9606	BCL2 protein inhibits the reaction [[Cisplatin co-treated with FASLG protein] results in increased activity of CASP3 protein]	affects^cotreatment|decreases^reaction|increases^activity	17574045
cisplatin	Cisplatin	D002945	15663-27-1	CASP3	836	Homo sapiens	9606	benzyloxycarbonyl-leucyl-glutamyl-histidyl-aspartic acid fluoromethyl ketone inhibits the reaction [[Cisplatin co-treated with FASLG protein] results in increased activity of CASP3 protein]	affects^cotreatment|decreases^reaction|increases^activity	17574045
cisplatin	Cisplatin	D002945	15663-27-1	CASP3	836	Homo sapiens	9606	beta-solamarine promotes the reaction [Cisplatin results in increased activity of CASP3 protein]	increases^activity|increases^reaction	17619073
cisplatin	Cisplatin	D002945	15663-27-1	CASP3	836	Homo sapiens	9606	BMI1 protein inhibits the reaction [Cisplatin results in increased activity of CASP3 protein]	decreases^reaction|increases^activity	21311599
cisplatin	Cisplatin	D002945	15663-27-1	CASP3	836	Homo sapiens	9606	CD40LG protein inhibits the reaction [Cisplatin promotes the reaction [CASP3 protein results in increased cleavage of PARP protein]]	decreases^reaction|increases^cleavage|increases^reaction	16545138
cisplatin	Cisplatin	D002945	15663-27-1	CASP3	836	Homo sapiens	9606	[Cisplatin co-treated with bortezomib] results in increased activity of CASP3 protein	affects^cotreatment|increases^activity	16357177
cisplatin	Cisplatin	D002945	15663-27-1	CASP3	836	Homo sapiens	9606	[Cisplatin co-treated with FASLG protein] results in increased activity of CASP3 protein	affects^cotreatment|increases^activity	17574045
cisplatin	Cisplatin	D002945	15663-27-1	CASP3	836	Homo sapiens	9606	[Cisplatin co-treated with fisetin] results in increased cleavage of and results in increased activity of CASP3 protein	affects^cotreatment|increases^activity|increases^cleavage	21216935
cisplatin	Cisplatin	D002945	15663-27-1	CASP3	836	Homo sapiens	9606	Cisplatin promotes the reaction [5-((2,6-dichlorobenzyl)sulfonyl)-3-((3,5-dimethyl-4-((2-(pyrrolidin-1-ylmethyl)pyrrolidin-1-yl)carbonyl)-1H-pyrrol-2-yl)methylene)-1,3-dihydro-2H-indol-2-one results in increased cleavage of CASP3 protein]	increases^cleavage|increases^reaction	20661229
cisplatin	Cisplatin	D002945	15663-27-1	CASP3	836	Homo sapiens	9606	Cisplatin promotes the reaction [CASP3 protein results in increased cleavage of PARP protein]	increases^cleavage|increases^reaction	16545138
cisplatin	Cisplatin	D002945	15663-27-1	CASP3	836	Homo sapiens	9606	Cisplatin promotes the reaction [Metformin results in increased activity of CASP3 protein]	increases^activity|increases^reaction	21388661
cisplatin	Cisplatin	D002945	15663-27-1	CASP3	836	Homo sapiens	9606	Cisplatin promotes the reaction [TNFSF10 protein results in increased cleavage of and results in increased activity of CASP3 protein]	increases^activity|increases^cleavage|increases^reaction	20856198|21037225
cisplatin	Cisplatin	D002945	15663-27-1	CASP3	836	Homo sapiens	9606	[Cisplatin promotes the reaction [TNFSF10 protein results in increased cleavage of and results in increased activity of CASP3 protein]] which results in increased cleavage of XIAP protein	increases^activity|increases^cleavage|increases^reaction	20856198
cisplatin	Cisplatin	D002945	15663-27-1	CASP3	836	Homo sapiens	9606	Cisplatin results in increased activity of and results in increased cleavage of CASP3 protein	increases^activity|increases^cleavage	17399942
cisplatin	Cisplatin	D002945	15663-27-1	CASP3	836	Homo sapiens	9606	Cisplatin results in increased activity of CASP3 protein	increases^activity	10663630|12565868|14512787|14727531|15863139|16009487|16080519|16357177|16803524|17619073|18383853|20106947|20654585|20655883|20802529|20878076|21035837|21052098|21132272|21166495|21266360|21311599|21368866|21372221|21507255|21527773|21641698|21737676|21742513|21795690|21801448
cisplatin	Cisplatin	D002945	15663-27-1	CASP3	836	Homo sapiens	9606	[Cisplatin results in increased activity of CASP3 protein] which results in increased cleavage of PARP1 protein	increases^activity|increases^cleavage	18176112
cisplatin	Cisplatin	D002945	15663-27-1	CASP3	836	Homo sapiens	9606	Cisplatin results in increased cleavage of and results in increased activity of CASP3 protein	increases^activity|increases^cleavage	17853063|20623264|21216935|21745194
cisplatin	Cisplatin	D002945	15663-27-1	CASP3	836	Homo sapiens	9606	Cisplatin results in increased cleavage of CASP3 protein	increases^cleavage	15496615|17021654|18058806|18071906|20145152|20661229|20947521|21255191|21334329|21618512|21660965
cisplatin	Cisplatin	D002945	15663-27-1	CASP3	836	Homo sapiens	9606	Cisplatin results in increased expression of and results in increased cleavage of CASP3 protein	increases^cleavage|increases^expression	20674069
cisplatin	Cisplatin	D002945	15663-27-1	CASP3	836	Homo sapiens	9606	Cisplatin results in increased expression of CASP3 mRNA	increases^expression	20623264|21278888
cisplatin	Cisplatin	D002945	15663-27-1	CASP3	836	Homo sapiens	9606	Cisplatin results in increased expression of CASP3 protein	increases^expression	16803524|20623183|21274007|21278888
cisplatin	Cisplatin	D002945	15663-27-1	CASP3	836	Homo sapiens	9606	CITED2 mutant form promotes the reaction [Cisplatin results in increased cleavage of CASP3 protein]	increases^cleavage|increases^reaction	21660965
cisplatin	Cisplatin	D002945	15663-27-1	CASP3	836	Homo sapiens	9606	[CITED2 results in decreased susceptibility to Cisplatin] which results in decreased activity of CASP3 protein	decreases^activity|decreases^response to substance	21660965
cisplatin	Cisplatin	D002945	15663-27-1	CASP3	836	Homo sapiens	9606	ESR2 protein promotes the reaction [Cisplatin results in increased expression of CASP3 protein]	increases^expression|increases^reaction	20623183
cisplatin	Cisplatin	D002945	15663-27-1	CASP3	836	Homo sapiens	9606	FAM168A protein inhibits the reaction [Cisplatin results in increased cleavage of CASP3 protein]	decreases^reaction|increases^cleavage	21334329
cisplatin	Cisplatin	D002945	15663-27-1	CASP3	836	Homo sapiens	9606	[Fluorouracil co-treated with Cisplatin] results in increased activity of CASP3 protein	affects^cotreatment|increases^activity	16803524
cisplatin	Cisplatin	D002945	15663-27-1	CASP3	836	Homo sapiens	9606	[Fluorouracil co-treated with Cisplatin] results in increased expression of CASP3 protein	affects^cotreatment|increases^expression	16803524
cisplatin	Cisplatin	D002945	15663-27-1	CASP3	836	Homo sapiens	9606	GCS-100 promotes the reaction [Cisplatin results in increased activity of CASP3 protein]	increases^activity|increases^reaction	21368866
cisplatin	Cisplatin	D002945	15663-27-1	CASP3	836	Homo sapiens	9606	GNAS protein inhibits the reaction [Cisplatin results in increased cleavage of CASP3 protein]	decreases^reaction|increases^cleavage	21255191
cisplatin	Cisplatin	D002945	15663-27-1	CASP3	836	Homo sapiens	9606	IL8 inhibits the reaction [Cisplatin results in increased activity of CASP3 protein]	decreases^reaction|increases^activity	21742513
cisplatin	Cisplatin	D002945	15663-27-1	CASP3	836	Homo sapiens	9606	ING4 protein promotes the reaction [Cisplatin results in increased activity of CASP3 protein]	increases^activity|increases^reaction	21052098
cisplatin	Cisplatin	D002945	15663-27-1	CASP3	836	Homo sapiens	9606	MIR630 mRNA inhibits the reaction [Cisplatin results in increased cleavage of CASP3 protein]	decreases^reaction|increases^cleavage	20145152
cisplatin	Cisplatin	D002945	15663-27-1	CASP3	836	Homo sapiens	9606	Nicotine inhibits the reaction [Cisplatin results in increased activity of CASP3 protein]	decreases^reaction|increases^activity	20106947
cisplatin	Cisplatin	D002945	15663-27-1	CASP3	836	Homo sapiens	9606	[Noscapine co-treated with Cisplatin] results in increased cleavage of CASP3 protein	affects^cotreatment|increases^cleavage	20674069
cisplatin	Cisplatin	D002945	15663-27-1	CASP3	836	Homo sapiens	9606	Noscapine promotes the reaction [Cisplatin results in increased expression of and results in increased cleavage of CASP3 protein]	increases^cleavage|increases^expression|increases^reaction	20674069
cisplatin	Cisplatin	D002945	15663-27-1	CASP3	836	Homo sapiens	9606	[Paclitaxel co-treated with Cisplatin] results in increased activity of CASP3 protein	affects^cotreatment|increases^activity	12709826
cisplatin	Cisplatin	D002945	15663-27-1	CASP3	836	Homo sapiens	9606	PD 150606 inhibits the reaction [Cisplatin results in increased activity of CASP3 protein]	decreases^reaction|increases^activity	21368866
cisplatin	Cisplatin	D002945	15663-27-1	CASP3	836	Homo sapiens	9606	PD 98059 inhibits the reaction [Cisplatin results in increased activity of CASP3 protein]	decreases^reaction|increases^activity	20802529
cisplatin	Cisplatin	D002945	15663-27-1	CASP3	836	Homo sapiens	9606	PLK1 protein inhibits the reaction [Cisplatin results in increased activity of CASP3 protein]	decreases^reaction|increases^activity	20655883
cisplatin	Cisplatin	D002945	15663-27-1	CASP3	836	Homo sapiens	9606	PRDX6 protein inhibits the reaction [Cisplatin results in increased activity of CASP3 protein]	decreases^reaction|increases^activity	21166495
cisplatin	Cisplatin	D002945	15663-27-1	CASP3	836	Homo sapiens	9606	RAPGEF3 affects the reaction [8-(4-chloro-phenylthio)-2'-O-methyladenosine-3'-5'-cyclic monophosphate inhibits the reaction [Cisplatin results in increased cleavage of and results in increased activity of CASP3 protein]]	affects^reaction|decreases^reaction|increases^activity|increases^cleavage	21745194
cisplatin	Cisplatin	D002945	15663-27-1	CASP3	836	Homo sapiens	9606	RELA protein mutant form inhibits the reaction [Cisplatin results in increased activity of CASP3 protein]	decreases^reaction|increases^activity	21737676
cisplatin	Cisplatin	D002945	15663-27-1	CASP3	836	Homo sapiens	9606	RNF34 protein inhibits the reaction [Cisplatin results in increased activity of CASP3 protein]	decreases^reaction|increases^activity	16080519
cisplatin	Cisplatin	D002945	15663-27-1	CASP3	836	Homo sapiens	9606	Sirolimus promotes the reaction [Cisplatin results in increased cleavage of CASP3 protein]	increases^cleavage|increases^reaction	18058806
cisplatin	Cisplatin	D002945	15663-27-1	CASP3	836	Homo sapiens	9606	SMG1 protein inhibits the reaction [Cisplatin results in increased activity of CASP3 protein]	decreases^reaction|increases^activity	21418860
cisplatin	Cisplatin	D002945	15663-27-1	CASP3	836	Homo sapiens	9606	TINAG inhibits the reaction [Cisplatin results in increased activity of CASP3 protein]	decreases^reaction|increases^activity	21795690
cisplatin	Cisplatin	D002945	15663-27-1	CASP3	836	Homo sapiens	9606	[TNFSF10 protein co-treated with Cisplatin] results in increased activity of CASP3 protein	affects^cotreatment|increases^activity	21252285
cisplatin	Cisplatin	D002945	15663-27-1	CASP3	836	Homo sapiens	9606	TNFSF10 protein promotes the reaction [Cisplatin results in increased cleavage of and results in increased activity of CASP3 protein]	increases^activity|increases^cleavage|increases^reaction	20623264
cisplatin	Cisplatin	D002945	15663-27-1	CASP3	836	Homo sapiens	9606	TRAP1 protein inhibits the reaction [Cisplatin results in increased cleavage of and results in increased activity of CASP3 protein]	decreases^reaction|increases^activity|increases^cleavage	17853063
cisplatin	Cisplatin	D002945	15663-27-1	CASP3	836	Homo sapiens	9606	TYMP inhibits the reaction [Cisplatin results in increased activity of CASP3 protein]	decreases^reaction|increases^activity	14727531
cisplatin	Cisplatin	D002945	15663-27-1	CASP3	836	Homo sapiens	9606	TYMP protein inhibits the reaction [Cisplatin results in increased activity of CASP3 protein]	decreases^reaction|increases^activity	12565868
cisplatin	Cisplatin	D002945	15663-27-1	CASP3	836	Homo sapiens	9606	Valproic Acid promotes the reaction [Cisplatin results in increased activity of CASP3 protein]	increases^activity|increases^reaction	21507255
cisplatin	Cisplatin	D002945	15663-27-1	CASP3	836	Homo sapiens	9606	YAP1 protein inhibits the reaction [Cisplatin results in increased cleavage of CASP3 protein]	decreases^reaction|increases^cleavage	20947521
cisplatin	Cisplatin	D002945	15663-27-1	CASP4	837	Homo sapiens	9606	CASP4 protein results in increased susceptibility to Cisplatin	increases^response to substance	16357177
cisplatin	Cisplatin	D002945	15663-27-1	CASP4	837	Homo sapiens	9606	CASP4 protein results in increased susceptibility to [Cisplatin co-treated with bortezomib]	affects^cotreatment|increases^response to substance	16357177
cisplatin	Cisplatin	D002945	15663-27-1	CASP4	837	Homo sapiens	9606	Cisplatin results in increased activity of CASP4 protein	increases^activity	16357177
cisplatin	Cisplatin	D002945	15663-27-1	CASP4	837	Homo sapiens	9606	[vorinostat co-treated with Cisplatin] results in increased activity of CASP4 protein	affects^cotreatment|increases^activity	19280190
cisplatin	Cisplatin	D002945	15663-27-1	CASP7	840	Homo sapiens	9606	[Cisplatin co-treated with fisetin] promotes the reaction [CASP9 protein results in increased cleavage of CASP7 protein]	affects^cotreatment|increases^cleavage|increases^reaction	21216935
cisplatin	Cisplatin	D002945	15663-27-1	CASP7	840	Homo sapiens	9606	Cisplatin promotes the reaction [Metformin results in increased activity of CASP7 protein]	increases^activity|increases^reaction	21388661
cisplatin	Cisplatin	D002945	15663-27-1	CASP7	840	Homo sapiens	9606	Cisplatin results in increased activity of CASP7 protein	increases^activity	20654585|21420390|21795690|21801448
cisplatin	Cisplatin	D002945	15663-27-1	CASP7	840	Homo sapiens	9606	TINAG inhibits the reaction [Cisplatin results in increased activity of CASP7 protein]	decreases^reaction|increases^activity	21795690
cisplatin	Cisplatin	D002945	15663-27-1	CASP8	841	Homo sapiens	9606	Acetylcysteine inhibits the reaction [[Cisplatin co-treated with FASLG protein] results in increased activity of CASP8 protein]	affects^cotreatment|decreases^reaction|increases^activity	17574045
cisplatin	Cisplatin	D002945	15663-27-1	CASP8	841	Homo sapiens	9606	acetyl-leucyl-glutamyl-histidyl-aspartal affects the reaction [Cisplatin results in increased activity of CASP8 protein]	affects^reaction|increases^activity	21801448
cisplatin	Cisplatin	D002945	15663-27-1	CASP8	841	Homo sapiens	9606	BCL2 protein inhibits the reaction [[Cisplatin co-treated with FASLG protein] results in increased activity of CASP8 protein]	affects^cotreatment|decreases^reaction|increases^activity	17574045
cisplatin	Cisplatin	D002945	15663-27-1	CASP8	841	Homo sapiens	9606	benzyloxycarbonyl-leucyl-glutamyl-histidyl-aspartic acid fluoromethyl ketone inhibits the reaction [[Cisplatin co-treated with FASLG protein] results in increased activity of CASP8 protein]	affects^cotreatment|decreases^reaction|increases^activity	17574045
cisplatin	Cisplatin	D002945	15663-27-1	CASP8	841	Homo sapiens	9606	beta-solamarine promotes the reaction [Cisplatin results in increased activity of CASP8 protein]	increases^activity|increases^reaction	17619073
cisplatin	Cisplatin	D002945	15663-27-1	CASP8	841	Homo sapiens	9606	BMI1 inhibits the reaction [Cisplatin results in increased cleavage of CASP8 protein]	decreases^reaction|increases^cleavage	21445297
cisplatin	Cisplatin	D002945	15663-27-1	CASP8	841	Homo sapiens	9606	CASP8 inhibits the reaction [CASP8 protein mutant form results in decreased susceptibility to Cisplatin]	decreases^reaction|decreases^response to substance	21801448
cisplatin	Cisplatin	D002945	15663-27-1	CASP8	841	Homo sapiens	9606	CASP8 protein mutant form results in decreased susceptibility to Cisplatin	decreases^response to substance	21801448
cisplatin	Cisplatin	D002945	15663-27-1	CASP8	841	Homo sapiens	9606	[Cisplatin co-treated with 2,5,7,8-tetramethyl-2R-(4R,8R,12-trimethyltridecyl)chroman-6-yloxy acetic acid] results in increased cleavage of CASP8 protein	affects^cotreatment|increases^cleavage	21214929
cisplatin	Cisplatin	D002945	15663-27-1	CASP8	841	Homo sapiens	9606	[Cisplatin co-treated with FASLG protein] results in increased activity of CASP8 protein	affects^cotreatment|increases^activity	17574045
cisplatin	Cisplatin	D002945	15663-27-1	CASP8	841	Homo sapiens	9606	[Cisplatin co-treated with fisetin] results in increased cleavage of and results in increased activity of CASP8 protein	affects^cotreatment|increases^activity|increases^cleavage	21216935
cisplatin	Cisplatin	D002945	15663-27-1	CASP8	841	Homo sapiens	9606	[Cisplatin co-treated with panobinostat] affects the expression of CASP8 mRNA	affects^cotreatment|affects^expression	21791302
cisplatin	Cisplatin	D002945	15663-27-1	CASP8	841	Homo sapiens	9606	Cisplatin inhibits the reaction [CASP8 protein results in increased cleavage of BID protein]	decreases^reaction|increases^cleavage	19590723
cisplatin	Cisplatin	D002945	15663-27-1	CASP8	841	Homo sapiens	9606	Cisplatin promotes the reaction [TNFSF10 protein results in increased cleavage of and results in increased activity of CASP8 protein]	increases^activity|increases^cleavage|increases^reaction	21037225
cisplatin	Cisplatin	D002945	15663-27-1	CASP8	841	Homo sapiens	9606	Cisplatin results in increased activity of CASP8 protein	increases^activity	16009487|16803524|17619073|21052098
cisplatin	Cisplatin	D002945	15663-27-1	CASP8	841	Homo sapiens	9606	Cisplatin results in increased cleavage of and results in increased activity of CASP8 protein	increases^activity|increases^cleavage	21216935
cisplatin	Cisplatin	D002945	15663-27-1	CASP8	841	Homo sapiens	9606	Cisplatin results in increased cleavage of CASP8 protein	increases^cleavage	17021654|18058806|18071906|20947521|21445297
cisplatin	Cisplatin	D002945	15663-27-1	CASP8	841	Homo sapiens	9606	Cisplatin results in increased expression of CASP8 mRNA	increases^expression	21487429
cisplatin	Cisplatin	D002945	15663-27-1	CASP8	841	Homo sapiens	9606	Cisplatin results in increased expression of CASP8 protein	increases^expression	16803524|21487429
cisplatin	Cisplatin	D002945	15663-27-1	CASP8	841	Homo sapiens	9606	[Cisplatin results in increased expression of CASP8 protein] which results in increased susceptibility to TNFSF10 protein	increases^expression|increases^response to substance	21487429
cisplatin	Cisplatin	D002945	15663-27-1	CASP8	841	Homo sapiens	9606	[Cisplatin results in increased expression of SRSF2 protein] which affects the splicing of CASP8 mRNA	affects^splicing|increases^expression	21157427
cisplatin	Cisplatin	D002945	15663-27-1	CASP8	841	Homo sapiens	9606	[[Cisplatin results in increased expression of SRSF2 protein] which affects the splicing of CASP8 mRNA] which results in increased activity of CASP8 protein	affects^splicing|increases^activity|increases^expression	21157427
cisplatin	Cisplatin	D002945	15663-27-1	CASP8	841	Homo sapiens	9606	[Fluorouracil co-treated with Cisplatin] results in increased activity of CASP8 protein	affects^cotreatment|increases^activity	16803524
cisplatin	Cisplatin	D002945	15663-27-1	CASP8	841	Homo sapiens	9606	[Fluorouracil co-treated with Cisplatin] results in increased expression of CASP8 protein	affects^cotreatment|increases^expression	16803524
cisplatin	Cisplatin	D002945	15663-27-1	CASP8	841	Homo sapiens	9606	ING4 protein promotes the reaction [Cisplatin results in increased activity of CASP8 protein]	increases^activity|increases^reaction	21052098
cisplatin	Cisplatin	D002945	15663-27-1	CASP8	841	Homo sapiens	9606	Sirolimus promotes the reaction [Cisplatin results in increased cleavage of CASP8 protein]	increases^cleavage|increases^reaction	18058806
cisplatin	Cisplatin	D002945	15663-27-1	CASP8	841	Homo sapiens	9606	[TNFSF10 protein co-treated with Cisplatin] results in increased activity of CASP8 protein	affects^cotreatment|increases^activity	21252285
cisplatin	Cisplatin	D002945	15663-27-1	CASP8	841	Homo sapiens	9606	YAP1 protein inhibits the reaction [Cisplatin results in increased cleavage of CASP8 protein]	decreases^reaction|increases^cleavage	20947521
cisplatin	Cisplatin	D002945	15663-27-1	CASP9	842	Homo sapiens	9606	[4-methylene-2-octyl-5-oxofuran-3-carboxylic acid co-treated with Cisplatin] results in increased activity of CASP9 protein	affects^cotreatment|increases^activity	21442130
cisplatin	Cisplatin	D002945	15663-27-1	CASP9	842	Homo sapiens	9606	ABCB1 protein inhibits the reaction [Cisplatin results in increased activity of CASP9 protein]	decreases^reaction|increases^activity	22269388
cisplatin	Cisplatin	D002945	15663-27-1	CASP9	842	Homo sapiens	9606	Acetylcysteine inhibits the reaction [[Cisplatin co-treated with FASLG protein] results in increased activity of CASP9 protein]	affects^cotreatment|decreases^reaction|increases^activity	17574045
cisplatin	Cisplatin	D002945	15663-27-1	CASP9	842	Homo sapiens	9606	Acetylcysteine inhibits the reaction [Cisplatin results in increased activity of CASP9 protein]	decreases^reaction|increases^activity	21166495
cisplatin	Cisplatin	D002945	15663-27-1	CASP9	842	Homo sapiens	9606	Acetylcysteine inhibits the reaction [Cisplatin results in increased cleavage of CASP9 protein]	decreases^reaction|increases^cleavage	15496615
cisplatin	Cisplatin	D002945	15663-27-1	CASP9	842	Homo sapiens	9606	BCL2 inhibits the reaction [Cisplatin results in increased cleavage of CASP9 protein]	decreases^reaction|increases^cleavage	21618512
cisplatin	Cisplatin	D002945	15663-27-1	CASP9	842	Homo sapiens	9606	BCL2 protein inhibits the reaction [[Cisplatin co-treated with FASLG protein] results in increased activity of CASP9 protein]	affects^cotreatment|decreases^reaction|increases^activity	17574045
cisplatin	Cisplatin	D002945	15663-27-1	CASP9	842	Homo sapiens	9606	benzyloxycarbonyl-leucyl-glutamyl-histidyl-aspartic acid fluoromethyl ketone inhibits the reaction [[Cisplatin co-treated with FASLG protein] results in increased activity of CASP9 protein]	affects^cotreatment|decreases^reaction|increases^activity	17574045
cisplatin	Cisplatin	D002945	15663-27-1	CASP9	842	Homo sapiens	9606	beta-solamarine promotes the reaction [Cisplatin results in increased activity of CASP9 protein]	increases^activity|increases^reaction	17619073
cisplatin	Cisplatin	D002945	15663-27-1	CASP9	842	Homo sapiens	9606	BMI1 protein inhibits the reaction [Cisplatin results in increased activity of CASP9 protein]	decreases^reaction|increases^activity	21311599
cisplatin	Cisplatin	D002945	15663-27-1	CASP9	842	Homo sapiens	9606	[Cisplatin co-treated with 2,5,7,8-tetramethyl-2R-(4R,8R,12-trimethyltridecyl)chroman-6-yloxy acetic acid] results in increased cleavage of CASP9 protein	affects^cotreatment|increases^cleavage	21214929
cisplatin	Cisplatin	D002945	15663-27-1	CASP9	842	Homo sapiens	9606	[Cisplatin co-treated with Etoposide] results in increased activity of CASP9 protein	affects^cotreatment|increases^activity	18676776
cisplatin	Cisplatin	D002945	15663-27-1	CASP9	842	Homo sapiens	9606	[Cisplatin co-treated with FASLG protein] results in increased activity of CASP9 protein	affects^cotreatment|increases^activity	17574045
cisplatin	Cisplatin	D002945	15663-27-1	CASP9	842	Homo sapiens	9606	[Cisplatin co-treated with fisetin] promotes the reaction [CASP9 protein results in increased cleavage of CASP7 protein]	affects^cotreatment|increases^cleavage|increases^reaction	21216935
cisplatin	Cisplatin	D002945	15663-27-1	CASP9	842	Homo sapiens	9606	[Cisplatin co-treated with fisetin] results in increased cleavage of and results in increased activity of CASP9 protein	affects^cotreatment|increases^activity|increases^cleavage	21216935
cisplatin	Cisplatin	D002945	15663-27-1	CASP9	842	Homo sapiens	9606	Cisplatin results in decreased expression of CASP9 mRNA	decreases^expression	17404015
cisplatin	Cisplatin	D002945	15663-27-1	CASP9	842	Homo sapiens	9606	Cisplatin results in increased activity of CASP9 protein	increases^activity	12565868|14727531|16009487|16803524|17619073|21052098|21166495|21271225|21311599|21420390
cisplatin	Cisplatin	D002945	15663-27-1	CASP9	842	Homo sapiens	9606	Cisplatin results in increased cleavage of CASP9 protein	increases^cleavage	15496615|18058806|19147209|20145152|21324178|21442237|21618512
cisplatin	Cisplatin	D002945	15663-27-1	CASP9	842	Homo sapiens	9606	Cisplatin results in increased expression of and results in increased cleavage of CASP9 protein	increases^cleavage|increases^expression	20674069
cisplatin	Cisplatin	D002945	15663-27-1	CASP9	842	Homo sapiens	9606	Cisplatin results in increased expression of CASP9 protein	increases^expression	16803524
cisplatin	Cisplatin	D002945	15663-27-1	CASP9	842	Homo sapiens	9606	CXCL2 protein promotes the reaction [Cisplatin results in increased activity of CASP9 protein]	increases^activity|increases^reaction	21271225
cisplatin	Cisplatin	D002945	15663-27-1	CASP9	842	Homo sapiens	9606	[Deoxyglucose co-treated with Cisplatin] results in increased activity of CASP9 protein	affects^cotreatment|increases^activity	20138251
cisplatin	Cisplatin	D002945	15663-27-1	CASP9	842	Homo sapiens	9606	EGR1 protein promotes the reaction [Cisplatin results in increased activity of CASP9 protein]	increases^activity|increases^reaction	21271225
cisplatin	Cisplatin	D002945	15663-27-1	CASP9	842	Homo sapiens	9606	[Fluorouracil co-treated with Cisplatin] results in increased activity of CASP9 protein	affects^cotreatment|increases^activity	16803524
cisplatin	Cisplatin	D002945	15663-27-1	CASP9	842	Homo sapiens	9606	[Fluorouracil co-treated with Cisplatin] results in increased expression of CASP9 protein	affects^cotreatment|increases^expression	16803524
cisplatin	Cisplatin	D002945	15663-27-1	CASP9	842	Homo sapiens	9606	ING4 protein promotes the reaction [Cisplatin results in increased activity of CASP9 protein]	increases^activity|increases^reaction	21052098
cisplatin	Cisplatin	D002945	15663-27-1	CASP9	842	Homo sapiens	9606	MIR630 mRNA inhibits the reaction [Cisplatin results in increased cleavage of CASP9 protein]	decreases^reaction|increases^cleavage	20145152
cisplatin	Cisplatin	D002945	15663-27-1	CASP9	842	Homo sapiens	9606	MYC protein promotes the reaction [Cisplatin results in increased cleavage of CASP9 protein]	increases^cleavage|increases^reaction	21324178
cisplatin	Cisplatin	D002945	15663-27-1	CASP9	842	Homo sapiens	9606	Nicotine inhibits the reaction [[Cisplatin co-treated with Etoposide] results in increased activity of CASP9 protein]	affects^cotreatment|decreases^reaction|increases^activity	18676776
cisplatin	Cisplatin	D002945	15663-27-1	CASP9	842	Homo sapiens	9606	Noscapine promotes the reaction [Cisplatin results in increased expression of and results in increased cleavage of CASP9 protein]	increases^cleavage|increases^expression|increases^reaction	20674069
cisplatin	Cisplatin	D002945	15663-27-1	CASP9	842	Homo sapiens	9606	PRDX6 protein inhibits the reaction [Cisplatin results in increased activity of CASP9 protein]	decreases^reaction|increases^activity	21166495
cisplatin	Cisplatin	D002945	15663-27-1	CASP9	842	Homo sapiens	9606	[Sirolimus co-treated with Cisplatin] results in increased activity of CASP9 protein	affects^cotreatment|increases^activity	20138251
cisplatin	Cisplatin	D002945	15663-27-1	CASP9	842	Homo sapiens	9606	Sirolimus promotes the reaction [Cisplatin results in increased cleavage of CASP9 protein]	increases^cleavage|increases^reaction	18058806
cisplatin	Cisplatin	D002945	15663-27-1	CASP9	842	Homo sapiens	9606	SMG1 protein inhibits the reaction [Cisplatin results in increased activity of CASP9 protein]	decreases^reaction|increases^activity	21418860
cisplatin	Cisplatin	D002945	15663-27-1	CASP9	842	Homo sapiens	9606	[TNFSF10 protein co-treated with Cisplatin] results in increased activity of CASP9 protein	affects^cotreatment|increases^activity	21252285
cisplatin	Cisplatin	D002945	15663-27-1	CASP9	842	Homo sapiens	9606	TYMP inhibits the reaction [Cisplatin results in increased activity of CASP9 protein]	decreases^reaction|increases^activity	14727531
cisplatin	Cisplatin	D002945	15663-27-1	CASP9	842	Homo sapiens	9606	TYMP protein inhibits the reaction [Cisplatin results in increased activity of CASP9 protein]	decreases^reaction|increases^activity	12565868
cisplatin	Cisplatin	D002945	15663-27-1	CAT	847	Homo sapiens	9606	CAT protein results in decreased susceptibility to Cisplatin	decreases^response to substance	10754530
cisplatin	Cisplatin	D002945	15663-27-1	CAT	847	Homo sapiens	9606	Cisplatin results in decreased activity of CAT protein	decreases^activity	15930895|21574897
cisplatin	Cisplatin	D002945	15663-27-1	CAT	847	Homo sapiens	9606	Curcumin inhibits the reaction [Cisplatin results in decreased activity of CAT protein]	decreases^activity|decreases^reaction	21574897
cisplatin	Cisplatin	D002945	15663-27-1	CAT	847	Homo sapiens	9606	EPO protein inhibits the reaction [Cisplatin results in increased activity of CAT protein]	decreases^reaction|increases^activity	22013135
cisplatin	Cisplatin	D002945	15663-27-1	CAT	847	Homo sapiens	9606	resveratrol inhibits the reaction [Cisplatin results in decreased activity of CAT protein]	decreases^activity|decreases^reaction	15930895
cisplatin	Cisplatin	D002945	15663-27-1	CAV1	857	Homo sapiens	9606	CAV1 protein affects the susceptibility to Cisplatin	affects^response to substance	16217747
cisplatin	Cisplatin	D002945	15663-27-1	CCDC85B	11007	Homo sapiens	9606	CCDC85B protein affects the susceptibility to Cisplatin	affects^response to substance	16217747
cisplatin	Cisplatin	D002945	15663-27-1	CCNA2	890	Homo sapiens	9606	Cisplatin promotes the reaction [Piroxicam results in decreased expression of CCNA2 mRNA]	decreases^expression|increases^reaction	21858171
cisplatin	Cisplatin	D002945	15663-27-1	CCNA2	890	Homo sapiens	9606	Cisplatin results in decreased activity of [CCNA2 protein binds to CDK2 protein]	affects^binding|decreases^activity	21592546
cisplatin	Cisplatin	D002945	15663-27-1	CCNA2	890	Homo sapiens	9606	Cisplatin results in increased activity of [CDK2 protein binds to CCNA2 protein]	affects^binding|increases^activity	12012012
cisplatin	Cisplatin	D002945	15663-27-1	CCNA2	890	Homo sapiens	9606	Tretinoin affects the reaction [Cisplatin results in increased activity of [CDK2 protein binds to CCNA2 protein]]	affects^binding|affects^reaction|increases^activity	12012012
cisplatin	Cisplatin	D002945	15663-27-1	CCNB1	891	Homo sapiens	9606	(1,2-bis(1,2-benzisoselenazolone-3(2H)-ketone))ethane inhibits the reaction [Cisplatin results in increased expression of CCNB1 protein]	decreases^reaction|increases^expression	20195699
cisplatin	Cisplatin	D002945	15663-27-1	CCNB1	891	Homo sapiens	9606	[Cisplatin co-treated with fisetin] results in decreased expression of CCNB1 protein	affects^cotreatment|decreases^expression	21216935
cisplatin	Cisplatin	D002945	15663-27-1	CCNB1	891	Homo sapiens	9606	Cisplatin results in decreased activity of CCNB1 protein	decreases^activity	21592546
cisplatin	Cisplatin	D002945	15663-27-1	CCNB1	891	Homo sapiens	9606	Cisplatin results in decreased activity of [CCNB1 protein binds to CDK1 protein]	affects^binding|decreases^activity	21592546
cisplatin	Cisplatin	D002945	15663-27-1	CCNB1	891	Homo sapiens	9606	Cisplatin results in increased expression of CCNB1 protein	increases^expression	20195699
cisplatin	Cisplatin	D002945	15663-27-1	CCNB1	891	Homo sapiens	9606	[Piroxicam co-treated with Cisplatin] results in decreased expression of CCNB1 mRNA	affects^cotreatment|decreases^expression	21858171
cisplatin	Cisplatin	D002945	15663-27-1	CCNB2	9133	Homo sapiens	9606	Cisplatin affects the reaction [Piroxicam results in decreased expression of CCNB2 mRNA]	affects^reaction|decreases^expression	21858171
cisplatin	Cisplatin	D002945	15663-27-1	CCND1	595	Homo sapiens	9606	[Cisplatin co-treated with pemetrexed co-treated with Valproic Acid] results in decreased expression of CCND1 protein	affects^cotreatment|decreases^expression	19351772
cisplatin	Cisplatin	D002945	15663-27-1	CCND1	595	Homo sapiens	9606	[Cisplatin co-treated with pemetrexed co-treated with vorinostat] results in decreased expression of CCND1 protein	affects^cotreatment|decreases^expression	19351772
cisplatin	Cisplatin	D002945	15663-27-1	CCND1	595	Homo sapiens	9606	Cisplatin promotes the reaction [(1,2-bis(1,2-benzisoselenazolone-3(2H)-ketone))ethane results in decreased expression of CCND1 mRNA]	decreases^expression|increases^reaction	20195699
cisplatin	Cisplatin	D002945	15663-27-1	CCND1	595	Homo sapiens	9606	Cisplatin promotes the reaction [(1,2-bis(1,2-benzisoselenazolone-3(2H)-ketone))ethane results in decreased expression of CCND1 protein]	decreases^expression|increases^reaction	20195699
cisplatin	Cisplatin	D002945	15663-27-1	CCND1	595	Homo sapiens	9606	Cisplatin results in decreased activity of [CCND1 protein binds to CDK4 protein]	affects^binding|decreases^activity	21592546
cisplatin	Cisplatin	D002945	15663-27-1	CCND1	595	Homo sapiens	9606	Cisplatin results in decreased expression of CCND1 protein	decreases^expression	20195699
cisplatin	Cisplatin	D002945	15663-27-1	CCNE1	898	Homo sapiens	9606	CCNE1 protein affects the susceptibility to Cisplatin	affects^response to substance	16217747
cisplatin	Cisplatin	D002945	15663-27-1	CCNE1	898	Homo sapiens	9606	CCNE1 results in increased susceptibility to Cisplatin	increases^response to substance	21103391
cisplatin	Cisplatin	D002945	15663-27-1	CCNE1	898	Homo sapiens	9606	Cisplatin results in decreased activity of [CCNE1 protein binds to CDK2 protein]	affects^binding|decreases^activity	21592546
cisplatin	Cisplatin	D002945	15663-27-1	CCNG2	901	Homo sapiens	9606	CCNG2 protein affects the susceptibility to Cisplatin	affects^response to substance	16217747
cisplatin	Cisplatin	D002945	15663-27-1	CCNY	219771	Homo sapiens	9606	Cisplatin results in decreased expression of CCNY mRNA	decreases^expression	19561079
cisplatin	Cisplatin	D002945	15663-27-1	CCRN4L	25819	Homo sapiens	9606	Cisplatin results in increased expression of CCRN4L mRNA	increases^expression	19561079
cisplatin	Cisplatin	D002945	15663-27-1	CD151	977	Homo sapiens	9606	CD151 protein results in decreased susceptibility to Cisplatin	decreases^response to substance	16734730
cisplatin	Cisplatin	D002945	15663-27-1	CD274	29126	Homo sapiens	9606	Cisplatin results in decreased expression of CD274	decreases^expression	21765211
cisplatin	Cisplatin	D002945	15663-27-1	CD4	920	Homo sapiens	9606	CD4 mutant form inhibits the reaction [[Cisplatin co-treated with IL33] results in increased expression of CXCL1]	affects^cotreatment|decreases^reaction|increases^expression	21949094
cisplatin	Cisplatin	D002945	15663-27-1	CD40LG	959	Homo sapiens	9606	CD40LG protein inhibits the reaction [Cisplatin promotes the reaction [CASP3 protein results in increased cleavage of PARP protein]]	decreases^reaction|increases^cleavage|increases^reaction	16545138
cisplatin	Cisplatin	D002945	15663-27-1	CD40LG	959	Homo sapiens	9606	CD40LG protein results in decreased susceptibility to Cisplatin	decreases^response to substance	16545138
cisplatin	Cisplatin	D002945	15663-27-1	CD44	960	Homo sapiens	9606	CD44 gene mutant form results in decreased susceptibility to Cisplatin	decreases^response to substance	21471434
cisplatin	Cisplatin	D002945	15663-27-1	CD44	960	Homo sapiens	9606	CD44 protein results in decreased susceptibility to Cisplatin	decreases^response to substance	21124918
cisplatin	Cisplatin	D002945	15663-27-1	CD44	960	Homo sapiens	9606	Cisplatin results in increased expression of CD44 protein	increases^expression	21618587
cisplatin	Cisplatin	D002945	15663-27-1	CD55	1604	Homo sapiens	9606	CD55 protein affects the susceptibility to Cisplatin	affects^response to substance	16217747
cisplatin	Cisplatin	D002945	15663-27-1	CD59	966	Homo sapiens	9606	[Cisplatin co-treated with Etoposide] results in decreased expression of CD59 protein	affects^cotreatment|decreases^expression	21826740
cisplatin	Cisplatin	D002945	15663-27-1	CD63	967	Homo sapiens	9606	Cisplatin affects the expression of CD63 mRNA	affects^expression	20216102
cisplatin	Cisplatin	D002945	15663-27-1	CDC2	34411	Homo sapiens	9606	Cisplatin affects the reaction [Piroxicam results in decreased expression of CDC2 mRNA]	affects^reaction|decreases^expression	21858171
cisplatin	Cisplatin	D002945	15663-27-1	CDC25C	995	Homo sapiens	9606	Cisplatin results in increased expression of and results in increased phosphorylation of CDC25C protein	increases^expression|increases^phosphorylation	20623183
cisplatin	Cisplatin	D002945	15663-27-1	CDC25C	995	Homo sapiens	9606	ESR2 protein inhibits the reaction [Cisplatin results in increased expression of and results in increased phosphorylation of CDC25C protein]	decreases^reaction|increases^expression|increases^phosphorylation	20623183
cisplatin	Cisplatin	D002945	15663-27-1	CDC40	51362	Homo sapiens	9606	Cisplatin results in increased expression of CDC40 protein	increases^expression	16803524
cisplatin	Cisplatin	D002945	15663-27-1	CDC42	998	Homo sapiens	9606	[Piroxicam co-treated with Cisplatin] results in increased expression of CDC42 mRNA	affects^cotreatment|increases^expression	21858171
cisplatin	Cisplatin	D002945	15663-27-1	CDCA3	83461	Homo sapiens	9606	Cisplatin promotes the reaction [Piroxicam results in decreased expression of CDCA3 mRNA]	decreases^expression|increases^reaction	21858171
cisplatin	Cisplatin	D002945	15663-27-1	CDCA8	55143	Homo sapiens	9606	Cisplatin inhibits the reaction [Piroxicam results in decreased expression of CDCA8 mRNA]	decreases^expression|decreases^reaction	21858171
cisplatin	Cisplatin	D002945	15663-27-1	CDH1	999	Homo sapiens	9606	[CDH1 protein binds to ENTPD6 protein] which results in decreased susceptibility to Cisplatin	affects^binding|decreases^response to substance	21519793
cisplatin	Cisplatin	D002945	15663-27-1	CDH1	999	Homo sapiens	9606	Cisplatin results in decreased expression of and results in decreased cleavage of CDH1 protein	decreases^cleavage|decreases^expression	21618587
cisplatin	Cisplatin	D002945	15663-27-1	CDH1	999	Homo sapiens	9606	Cisplatin results in decreased expression of CDH1 mRNA	decreases^expression	21618587
cisplatin	Cisplatin	D002945	15663-27-1	CDH2	1000	Homo sapiens	9606	Cisplatin results in increased expression of CDH2 protein	increases^expression	21618587
cisplatin	Cisplatin	D002945	15663-27-1	CDH3	1001	Homo sapiens	9606	CDH3 protein affects the susceptibility to Cisplatin	affects^response to substance	16217747
cisplatin	Cisplatin	D002945	15663-27-1	CDK1	983	Homo sapiens	9606	(1,2-bis(1,2-benzisoselenazolone-3(2H)-ketone))ethane inhibits the reaction [Cisplatin results in increased phosphorylation of CDK1 protein]	decreases^reaction|increases^phosphorylation	20195699
cisplatin	Cisplatin	D002945	15663-27-1	CDK1	983	Homo sapiens	9606	CDK1 results in decreased susceptibility to Cisplatin	decreases^response to substance	21849418
cisplatin	Cisplatin	D002945	15663-27-1	CDK1	983	Homo sapiens	9606	Cisplatin results in decreased activity of [CCNB1 protein binds to CDK1 protein]	affects^binding|decreases^activity	21592546
cisplatin	Cisplatin	D002945	15663-27-1	CDK1	983	Homo sapiens	9606	Cisplatin results in decreased expression of CDK1 mRNA	decreases^expression	21603599
cisplatin	Cisplatin	D002945	15663-27-1	CDK1	983	Homo sapiens	9606	Cisplatin results in increased phosphorylation of CDK1 protein	increases^phosphorylation	20195699|21592546
cisplatin	Cisplatin	D002945	15663-27-1	CDK2	1017	Homo sapiens	9606	Cisplatin affects the reaction [Piroxicam results in decreased expression of CDK2 mRNA]	affects^reaction|decreases^expression	21858171
cisplatin	Cisplatin	D002945	15663-27-1	CDK2	1017	Homo sapiens	9606	Cisplatin promotes the reaction [(1,2-bis(1,2-benzisoselenazolone-3(2H)-ketone))ethane results in decreased expression of CDK2 mRNA]	decreases^expression|increases^reaction	20195699
cisplatin	Cisplatin	D002945	15663-27-1	CDK2	1017	Homo sapiens	9606	Cisplatin results in decreased activity of [CCNA2 protein binds to CDK2 protein]	affects^binding|decreases^activity	21592546
cisplatin	Cisplatin	D002945	15663-27-1	CDK2	1017	Homo sapiens	9606	Cisplatin results in decreased activity of [CCNE1 protein binds to CDK2 protein]	affects^binding|decreases^activity	21592546
cisplatin	Cisplatin	D002945	15663-27-1	CDK2	1017	Homo sapiens	9606	Cisplatin results in increased activity of [CDK2 protein binds to CCNA2 protein]	affects^binding|increases^activity	12012012
cisplatin	Cisplatin	D002945	15663-27-1	CDK2	1017	Homo sapiens	9606	Cisplatin results in increased phosphorylation of CDK2 protein	increases^phosphorylation	21592546
cisplatin	Cisplatin	D002945	15663-27-1	CDK2	1017	Homo sapiens	9606	Tretinoin affects the reaction [Cisplatin results in increased activity of [CDK2 protein binds to CCNA2 protein]]	affects^binding|affects^reaction|increases^activity	12012012
cisplatin	Cisplatin	D002945	15663-27-1	CDK2AP1	8099	Homo sapiens	9606	Cisplatin results in increased expression of CDK2AP1 mRNA	increases^expression	19561079
cisplatin	Cisplatin	D002945	15663-27-1	CDK2AP2	10263	Homo sapiens	9606	Cisplatin results in increased expression of CDK2AP2 mRNA	increases^expression	19561079
cisplatin	Cisplatin	D002945	15663-27-1	CDK4	1019	Homo sapiens	9606	(1,2-bis(1,2-benzisoselenazolone-3(2H)-ketone))ethane inhibits the reaction [Cisplatin results in decreased expression of CDK4 protein]	decreases^expression|decreases^reaction	20195699
cisplatin	Cisplatin	D002945	15663-27-1	CDK4	1019	Homo sapiens	9606	Cisplatin promotes the reaction [(1,2-bis(1,2-benzisoselenazolone-3(2H)-ketone))ethane results in decreased expression of CDK4 mRNA]	decreases^expression|increases^reaction	20195699
cisplatin	Cisplatin	D002945	15663-27-1	CDK4	1019	Homo sapiens	9606	Cisplatin results in decreased activity of [CCND1 protein binds to CDK4 protein]	affects^binding|decreases^activity	21592546
cisplatin	Cisplatin	D002945	15663-27-1	CDK4	1019	Homo sapiens	9606	Cisplatin results in decreased expression of CDK4 protein	decreases^expression	20195699
cisplatin	Cisplatin	D002945	15663-27-1	CDK6	1021	Homo sapiens	9606	Cisplatin promotes the reaction [(1,2-bis(1,2-benzisoselenazolone-3(2H)-ketone))ethane results in decreased expression of CDK6 mRNA]	decreases^expression|increases^reaction	20195699
cisplatin	Cisplatin	D002945	15663-27-1	CDK6	1021	Homo sapiens	9606	Cisplatin results in decreased expression of CDK6 mRNA	decreases^expression	20195699
cisplatin	Cisplatin	D002945	15663-27-1	CDKL5	6792	Homo sapiens	9606	Cisplatin results in increased expression of CDKL5 protein	increases^expression	16803524
cisplatin	Cisplatin	D002945	15663-27-1	CDKN1A	1026	Homo sapiens	9606	(1,2-bis(1,2-benzisoselenazolone-3(2H)-ketone))ethane inhibits the reaction [Cisplatin results in decreased expression of CDKN1A protein]	decreases^expression|decreases^reaction	20195699
cisplatin	Cisplatin	D002945	15663-27-1	CDKN1A	1026	Homo sapiens	9606	2-hydroxy-1-naphthylaldehyde isonicotinoyl hydrazone inhibits the reaction [Cisplatin results in increased expression of and affects the localization of CDKN1A protein]	affects^localization|decreases^reaction|increases^expression	12807743
cisplatin	Cisplatin	D002945	15663-27-1	CDKN1A	1026	Homo sapiens	9606	Acetylcysteine inhibits the reaction [Cisplatin results in increased expression of CDKN1A]	decreases^reaction|increases^expression	15496615
cisplatin	Cisplatin	D002945	15663-27-1	CDKN1A	1026	Homo sapiens	9606	CDKN1A protein results in increased susceptibility to Cisplatin	increases^response to substance	21087528
cisplatin	Cisplatin	D002945	15663-27-1	CDKN1A	1026	Homo sapiens	9606	CDKN1A results in increased susceptibility to Cisplatin	increases^response to substance	21858171
cisplatin	Cisplatin	D002945	15663-27-1	CDKN1A	1026	Homo sapiens	9606	CDKN1A results in increased susceptibility to [Cisplatin co-treated with Piroxicam]	affects^cotreatment|increases^response to substance	21858171
cisplatin	Cisplatin	D002945	15663-27-1	CDKN1A	1026	Homo sapiens	9606	[Cisplatin co-treated with fisetin] results in increased expression of CDKN1A protein	affects^cotreatment|increases^expression	21216935
cisplatin	Cisplatin	D002945	15663-27-1	CDKN1A	1026	Homo sapiens	9606	[Cisplatin co-treated with pemetrexed co-treated with Valproic Acid] results in increased expression of CDKN1A protein	affects^cotreatment|increases^expression	19351772
cisplatin	Cisplatin	D002945	15663-27-1	CDKN1A	1026	Homo sapiens	9606	[Cisplatin co-treated with pemetrexed co-treated with vorinostat] results in increased expression of CDKN1A protein	affects^cotreatment|increases^expression	19351772
cisplatin	Cisplatin	D002945	15663-27-1	CDKN1A	1026	Homo sapiens	9606	[Cisplatin co-treated with pemetrexed] results in increased expression of CDKN1A protein	affects^cotreatment|increases^expression	19351772
cisplatin	Cisplatin	D002945	15663-27-1	CDKN1A	1026	Homo sapiens	9606	[Cisplatin co-treated with Piroxicam] affects the localization of CDKN1A protein	affects^cotreatment|affects^localization	21858171
cisplatin	Cisplatin	D002945	15663-27-1	CDKN1A	1026	Homo sapiens	9606	[Cisplatin co-treated with Piroxicam] results in decreased expression of CDKN1A protein	affects^cotreatment|decreases^expression	21858171
cisplatin	Cisplatin	D002945	15663-27-1	CDKN1A	1026	Homo sapiens	9606	[Cisplatin co-treated with TP73 protein] results in increased expression of CDKN1A protein	affects^cotreatment|increases^expression	20100536
cisplatin	Cisplatin	D002945	15663-27-1	CDKN1A	1026	Homo sapiens	9606	Cisplatin inhibits the reaction [(1,2-bis(1,2-benzisoselenazolone-3(2H)-ketone))ethane results in increased expression of CDKN1A mRNA]	decreases^reaction|increases^expression	20195699
cisplatin	Cisplatin	D002945	15663-27-1	CDKN1A	1026	Homo sapiens	9606	Cisplatin promotes the reaction [2,2-bis(hydroxymethyl)-1-azabicyclo(2,2,2,)octan-3-one results in increased expression of CDKN1A mRNA]	increases^expression|increases^reaction	21109480
cisplatin	Cisplatin	D002945	15663-27-1	CDKN1A	1026	Homo sapiens	9606	Cisplatin promotes the reaction [2,2-bis(hydroxymethyl)-1-azabicyclo(2,2,2,)octan-3-one results in increased expression of CDKN1A protein]	increases^expression|increases^reaction	21109480
cisplatin	Cisplatin	D002945	15663-27-1	CDKN1A	1026	Homo sapiens	9606	Cisplatin promotes the reaction [nutlin 3 results in increased expression of CDKN1A mRNA]	increases^expression|increases^reaction	21109480
cisplatin	Cisplatin	D002945	15663-27-1	CDKN1A	1026	Homo sapiens	9606	Cisplatin promotes the reaction [nutlin 3 results in increased expression of CDKN1A protein]	increases^expression|increases^reaction	21109480
cisplatin	Cisplatin	D002945	15663-27-1	CDKN1A	1026	Homo sapiens	9606	Cisplatin promotes the reaction [TP53 protein results in increased expression of CDKN1A mRNA]	increases^expression|increases^reaction	21489989
cisplatin	Cisplatin	D002945	15663-27-1	CDKN1A	1026	Homo sapiens	9606	Cisplatin results in decreased expression of CDKN1A protein	decreases^expression	14601052|20195699
cisplatin	Cisplatin	D002945	15663-27-1	CDKN1A	1026	Homo sapiens	9606	Cisplatin results in increased activity of and results in increased expression of CDKN1A protein	increases^activity|increases^expression	21624110
cisplatin	Cisplatin	D002945	15663-27-1	CDKN1A	1026	Homo sapiens	9606	Cisplatin results in increased expression of and affects the localization of CDKN1A protein	affects^localization|increases^expression	12807743
cisplatin	Cisplatin	D002945	15663-27-1	CDKN1A	1026	Homo sapiens	9606	Cisplatin results in increased expression of CDKN1A	increases^expression	15496615
cisplatin	Cisplatin	D002945	15663-27-1	CDKN1A	1026	Homo sapiens	9606	Cisplatin results in increased expression of CDKN1A mRNA	increases^expression	11099651|17355264|19561079|20878077|21532991|21750216
cisplatin	Cisplatin	D002945	15663-27-1	CDKN1A	1026	Homo sapiens	9606	Cisplatin results in increased expression of CDKN1A protein	increases^expression	12740909|16601104|19351772|20100536|20623183|20674069|21216935|21274007|21742020|9664115
cisplatin	Cisplatin	D002945	15663-27-1	CDKN1A	1026	Homo sapiens	9606	Cisplatin results in increased phosphorylation of CDKN1A protein	increases^phosphorylation	21750216
cisplatin	Cisplatin	D002945	15663-27-1	CDKN1A	1026	Homo sapiens	9606	Nicotine inhibits the reaction [Cisplatin results in increased expression of CDKN1A protein]	decreases^reaction|increases^expression	16601104
cisplatin	Cisplatin	D002945	15663-27-1	CDKN1A	1026	Homo sapiens	9606	Noscapine promotes the reaction [Cisplatin results in increased expression of CDKN1A protein]	increases^expression|increases^reaction	20674069
cisplatin	Cisplatin	D002945	15663-27-1	CDKN1A	1026	Homo sapiens	9606	nutlin 3 promotes the reaction [Cisplatin results in increased activity of and results in increased expression of CDKN1A protein]	increases^activity|increases^expression|increases^reaction	21624110
cisplatin	Cisplatin	D002945	15663-27-1	CDKN1A	1026	Homo sapiens	9606	[Piroxicam co-treated with Cisplatin] results in increased expression of CDKN1A mRNA	affects^cotreatment|increases^expression	21858171
cisplatin	Cisplatin	D002945	15663-27-1	CDKN1A	1026	Homo sapiens	9606	RAD23B mutant form inhibits the reaction [Cisplatin results in increased expression of CDKN1A protein]	decreases^reaction|increases^expression	21742020
cisplatin	Cisplatin	D002945	15663-27-1	CDKN1A	1026	Homo sapiens	9606	TP53 affects the reaction [Cisplatin results in increased activity of and results in increased expression of CDKN1A protein]	affects^reaction|increases^activity|increases^expression	21624110
cisplatin	Cisplatin	D002945	15663-27-1	CDKN1A	1026	Homo sapiens	9606	TP53 affects the reaction [nutlin 3 promotes the reaction [Cisplatin results in increased activity of and results in increased expression of CDKN1A protein]]	affects^reaction|increases^activity|increases^expression|increases^reaction	21624110
cisplatin	Cisplatin	D002945	15663-27-1	CDKN1A	1026	Homo sapiens	9606	Y 27632 inhibits the reaction [Cisplatin results in increased expression of CDKN1A mRNA]	decreases^reaction|increases^expression	20878077
cisplatin	Cisplatin	D002945	15663-27-1	CDKN1B	1027	Homo sapiens	9606	CDKN1B results in decreased susceptibility to Cisplatin	decreases^response to substance	21652059
cisplatin	Cisplatin	D002945	15663-27-1	CDKN1B	1027	Homo sapiens	9606	[Cisplatin inhibits the reaction [[Sirolimus results in increased phosphorylation of AKT1 protein] which results in increased phosphorylation of FOXO3A protein]] which results in increased expression of CDKN1B protein	decreases^reaction|increases^expression|increases^phosphorylation	21092744
cisplatin	Cisplatin	D002945	15663-27-1	CDKN1B	1027	Homo sapiens	9606	Cisplatin promotes the reaction [bortezomib results in increased expression of CDKN1B protein]	increases^expression|increases^reaction	19636294
cisplatin	Cisplatin	D002945	15663-27-1	CDKN1B	1027	Homo sapiens	9606	Cisplatin promotes the reaction [MIR630 mRNA results in increased expression of CDKN1B protein]	increases^expression|increases^reaction	20145152
cisplatin	Cisplatin	D002945	15663-27-1	CDKN1B	1027	Homo sapiens	9606	Cisplatin results in increased expression of CDKN1B mRNA	increases^expression	21092744
cisplatin	Cisplatin	D002945	15663-27-1	CDKN1B	1027	Homo sapiens	9606	Cisplatin results in increased expression of CDKN1B protein	increases^expression	21274007
cisplatin	Cisplatin	D002945	15663-27-1	CDKN1B	1027	Homo sapiens	9606	Sirolimus promotes the reaction [Cisplatin results in increased expression of CDKN1B mRNA]	increases^expression|increases^reaction	21092744
cisplatin	Cisplatin	D002945	15663-27-1	CDKN2A	1029	Homo sapiens	9606	Cisplatin results in decreased expression of CDKN2A protein	decreases^expression	16797627
cisplatin	Cisplatin	D002945	15663-27-1	CDKN2A	1029	Homo sapiens	9606	Cisplatin results in increased expression of CDKN2A mRNA	increases^expression	16797627
cisplatin	Cisplatin	D002945	15663-27-1	CDKN2A	1029	Homo sapiens	9606	Cisplatin results in increased expression of CDKN2A protein	increases^expression	16797627
cisplatin	Cisplatin	D002945	15663-27-1	CDKN2AIP	55602	Homo sapiens	9606	CDKN2AIP protein affects the susceptibility to Cisplatin	affects^response to substance	16217747
cisplatin	Cisplatin	D002945	15663-27-1	CDKN3	1033	Homo sapiens	9606	[Piroxicam co-treated with Cisplatin] results in decreased expression of CDKN3 mRNA	affects^cotreatment|decreases^expression	21858171
cisplatin	Cisplatin	D002945	15663-27-1	CEBPB	1051	Homo sapiens	9606	Cisplatin promotes the reaction [Piroxicam results in increased expression of CEBPB mRNA]	increases^expression|increases^reaction	21858171
cisplatin	Cisplatin	D002945	15663-27-1	CEBPD	1052	Homo sapiens	9606	Cisplatin results in increased expression of CEBPD mRNA	increases^expression	19561079
cisplatin	Cisplatin	D002945	15663-27-1	CEBPG	1054	Homo sapiens	9606	Cisplatin promotes the reaction [Piroxicam results in decreased expression of CEBPG mRNA]	decreases^expression|increases^reaction	21858171
cisplatin	Cisplatin	D002945	15663-27-1	CELSR2	1952	Homo sapiens	9606	CELSR2 protein affects the susceptibility to Cisplatin	affects^response to substance	16217747
cisplatin	Cisplatin	D002945	15663-27-1	CENPA	1058	Homo sapiens	9606	[Piroxicam co-treated with Cisplatin] results in decreased expression of CENPA mRNA	affects^cotreatment|decreases^expression	21858171
cisplatin	Cisplatin	D002945	15663-27-1	CERS4	79603	Homo sapiens	9606	CERS4 affects the susceptibility to Cisplatin	affects^response to substance	15756446
cisplatin	Cisplatin	D002945	15663-27-1	CES2	8824	Homo sapiens	9606	CES2 protein affects the susceptibility to Cisplatin	affects^response to substance	16217747
cisplatin	Cisplatin	D002945	15663-27-1	CES2	8824	Homo sapiens	9606	[Piroxicam co-treated with Cisplatin] results in decreased expression of CES2 mRNA	affects^cotreatment|decreases^expression	21858171
cisplatin	Cisplatin	D002945	15663-27-1	CFHR1	3078	Homo sapiens	9606	Cisplatin results in increased expression of CFHR1 protein	increases^expression	16803524
cisplatin	Cisplatin	D002945	15663-27-1	CFLAR	8837	Homo sapiens	9606	Cisplatin results in decreased expression of CFLAR protein	decreases^expression	14601052|20876774
cisplatin	Cisplatin	D002945	15663-27-1	CFLAR	8837	Homo sapiens	9606	[Cisplatin results in decreased expression of CFLAR protein] which results in increased susceptibility to TNFSF10 protein	decreases^expression|increases^response to substance	20876774
cisplatin	Cisplatin	D002945	15663-27-1	CHAC1	79094	Homo sapiens	9606	Cisplatin results in increased expression of CHAC1 mRNA	increases^expression	19561079
cisplatin	Cisplatin	D002945	15663-27-1	CHCHD3	54927	Homo sapiens	9606	Cisplatin results in decreased expression of CHCHD3 mRNA	decreases^expression	19561079
cisplatin	Cisplatin	D002945	15663-27-1	CHCHD7	79145	Homo sapiens	9606	Cisplatin results in increased expression of CHCHD7 mRNA	increases^expression	19561079
cisplatin	Cisplatin	D002945	15663-27-1	CHEK1	1111	Homo sapiens	9606	BRCA1 mutant form promotes the reaction [RRM2 mutant form promotes the reaction [TP53 mutant form promotes the reaction [Cisplatin results in increased activity of and results in increased phosphorylation of CHEK1 protein]]]	increases^activity|increases^phosphorylation|increases^reaction	21875941
cisplatin	Cisplatin	D002945	15663-27-1	CHEK1	1111	Homo sapiens	9606	CHEK1 mutant form promotes the reaction [TP53 mutant form results in increased susceptibility to Cisplatin]	increases^reaction|increases^response to substance	21875941
cisplatin	Cisplatin	D002945	15663-27-1	CHEK1	1111	Homo sapiens	9606	Cisplatin results in decreased expression of CHEK1 protein	decreases^expression	12740909
cisplatin	Cisplatin	D002945	15663-27-1	CHEK1	1111	Homo sapiens	9606	Cisplatin results in increased activity of CHEK1 protein	increases^activity	21324906|21592546
cisplatin	Cisplatin	D002945	15663-27-1	CHEK1	1111	Homo sapiens	9606	Cisplatin results in increased phosphorylation of and results in increased activity of CHEK1 protein	increases^activity|increases^phosphorylation	21107699|21875941
cisplatin	Cisplatin	D002945	15663-27-1	CHEK1	1111	Homo sapiens	9606	Cisplatin results in increased phosphorylation of CHEK1 protein	increases^phosphorylation	20623183|21285353|21356574
cisplatin	Cisplatin	D002945	15663-27-1	CHEK1	1111	Homo sapiens	9606	ERCC6 protein inhibits the reaction [Cisplatin results in increased activity of CHEK1 protein]	decreases^reaction|increases^activity	21324906
cisplatin	Cisplatin	D002945	15663-27-1	CHEK1	1111	Homo sapiens	9606	ESR2 protein inhibits the reaction [Cisplatin results in increased phosphorylation of CHEK1 protein]	decreases^reaction|increases^phosphorylation	20623183
cisplatin	Cisplatin	D002945	15663-27-1	CHEK1	1111	Homo sapiens	9606	Lovastatin inhibits the reaction [Cisplatin results in increased phosphorylation of CHEK1 protein]	decreases^reaction|increases^phosphorylation	21356574
cisplatin	Cisplatin	D002945	15663-27-1	CHEK1	1111	Homo sapiens	9606	RRM2 mutant form promotes the reaction [TP53 mutant form promotes the reaction [Cisplatin results in increased phosphorylation of and results in increased activity of CHEK1 protein]]	increases^activity|increases^phosphorylation|increases^reaction	21875941
cisplatin	Cisplatin	D002945	15663-27-1	CHEK1	1111	Homo sapiens	9606	TP53 mutant form promotes the reaction [Cisplatin results in increased phosphorylation of and results in increased activity of CHEK1 protein]	increases^activity|increases^phosphorylation|increases^reaction	21875941
cisplatin	Cisplatin	D002945	15663-27-1	CHEK2	11200	Homo sapiens	9606	BMI1 inhibits the reaction [Cisplatin results in increased phosphorylation of CHEK2 protein]	decreases^reaction|increases^phosphorylation	21445297
cisplatin	Cisplatin	D002945	15663-27-1	CHEK2	11200	Homo sapiens	9606	Cisplatin results in increased activity of CHEK2 protein	increases^activity	21324906|21592546
cisplatin	Cisplatin	D002945	15663-27-1	CHEK2	11200	Homo sapiens	9606	Cisplatin results in increased phosphorylation of and results in increased activity of CHEK2 protein	increases^activity|increases^phosphorylation	21107699
cisplatin	Cisplatin	D002945	15663-27-1	CHEK2	11200	Homo sapiens	9606	Cisplatin results in increased phosphorylation of CHEK2 protein	increases^phosphorylation	21285353|21445297|21750216
cisplatin	Cisplatin	D002945	15663-27-1	CHEK2	11200	Homo sapiens	9606	ERCC6 protein inhibits the reaction [Cisplatin results in increased activity of CHEK2 protein]	decreases^reaction|increases^activity	21324906
cisplatin	Cisplatin	D002945	15663-27-1	CHEK2	11200	Homo sapiens	9606	MSH2 protein promotes the reaction [Cisplatin results in increased phosphorylation of CHEK2 protein]	increases^phosphorylation|increases^reaction	21285353
cisplatin	Cisplatin	D002945	15663-27-1	CHFR	55743	Homo sapiens	9606	CHFR protein affects the susceptibility to [Cisplatin co-treated with erlotinib]	affects^cotreatment|affects^response to substance	20705357
cisplatin	Cisplatin	D002945	15663-27-1	CHI3L1	1116	Homo sapiens	9606	CHI3L1 results in decreased susceptibility to Cisplatin	decreases^response to substance	20506295
cisplatin	Cisplatin	D002945	15663-27-1	CHST11	50515	Homo sapiens	9606	Cisplatin results in decreased expression of CHST11 mRNA	decreases^expression	19561079
cisplatin	Cisplatin	D002945	15663-27-1	CHST5	23563	Homo sapiens	9606	[Piroxicam co-treated with Cisplatin] results in decreased expression of CHST5 mRNA	affects^cotreatment|decreases^expression	21858171
cisplatin	Cisplatin	D002945	15663-27-1	CIDEB	27141	Homo sapiens	9606	Cisplatin results in increased expression of CIDEB protein	increases^expression	16803524
cisplatin	Cisplatin	D002945	15663-27-1	CILP	8483	Homo sapiens	9606	CILP protein affects the susceptibility to Cisplatin	affects^response to substance	16217747
cisplatin	Cisplatin	D002945	15663-27-1	CITED2	10370	Homo sapiens	9606	Cisplatin results in increased expression of CITED2 mRNA	increases^expression	21660965
cisplatin	Cisplatin	D002945	15663-27-1	CITED2	10370	Homo sapiens	9606	Cisplatin results in increased expression of CITED2 protein	increases^expression	21660965
cisplatin	Cisplatin	D002945	15663-27-1	CITED2	10370	Homo sapiens	9606	CITED2 mutant form promotes the reaction [Cisplatin results in increased cleavage of CASP3 protein]	increases^cleavage|increases^reaction	21660965
cisplatin	Cisplatin	D002945	15663-27-1	CITED2	10370	Homo sapiens	9606	CITED2 mutant form promotes the reaction [Cisplatin results in increased cleavage of PARP1 protein]	increases^cleavage|increases^reaction	21660965
cisplatin	Cisplatin	D002945	15663-27-1	CITED2	10370	Homo sapiens	9606	CITED2 mutant form promotes the reaction [Cisplatin results in increased expression of and results in increased acetylation of TP53 protein]	increases^acetylation|increases^expression|increases^reaction	21660965
cisplatin	Cisplatin	D002945	15663-27-1	CITED2	10370	Homo sapiens	9606	CITED2 mutant form promotes the reaction [Cisplatin results in increased expression of BAX protein]	increases^expression|increases^reaction	21660965
cisplatin	Cisplatin	D002945	15663-27-1	CITED2	10370	Homo sapiens	9606	CITED2 mutant form promotes the reaction [Cisplatin results in increased phosphorylation of TP53 protein]	increases^phosphorylation|increases^reaction	21660965
cisplatin	Cisplatin	D002945	15663-27-1	CITED2	10370	Homo sapiens	9606	CITED2 results in decreased susceptibility to Cisplatin	decreases^response to substance	21660965
cisplatin	Cisplatin	D002945	15663-27-1	CITED2	10370	Homo sapiens	9606	[CITED2 results in decreased susceptibility to Cisplatin] which results in decreased activity of CASP3 protein	decreases^activity|decreases^response to substance	21660965
cisplatin	Cisplatin	D002945	15663-27-1	CITED2	10370	Homo sapiens	9606	[CITED2 results in decreased susceptibility to Cisplatin] which results in decreased cleavage of PARP1 protein	decreases^cleavage|decreases^response to substance	21660965
cisplatin	Cisplatin	D002945	15663-27-1	CITED2	10370	Homo sapiens	9606	[CITED2 results in decreased susceptibility to Cisplatin] which results in decreased expression of and results in decreased acetylation of TP53 protein	decreases^acetylation|decreases^expression|decreases^response to substance	21660965
cisplatin	Cisplatin	D002945	15663-27-1	CITED2	10370	Homo sapiens	9606	[CITED2 results in decreased susceptibility to Cisplatin] which results in decreased expression of BAX protein	decreases^expression|decreases^response to substance	21660965
cisplatin	Cisplatin	D002945	15663-27-1	CITED2	10370	Homo sapiens	9606	[CITED2 results in decreased susceptibility to Cisplatin] which results in decreased phosphorylation of TP53 protein	decreases^phosphorylation|decreases^response to substance	21660965
cisplatin	Cisplatin	D002945	15663-27-1	CITED2	10370	Homo sapiens	9606	pifithrin inhibits the reaction [CITED2 mutant form promotes the reaction [Cisplatin results in increased expression of BAX protein]]	decreases^reaction|increases^expression|increases^reaction	21660965
cisplatin	Cisplatin	D002945	15663-27-1	CITED2	10370	Homo sapiens	9606	pifithrin inhibits the reaction [CITED2 mutant form promotes the reaction [Cisplatin results in increased expression of TP53 protein]]	decreases^reaction|increases^expression|increases^reaction	21660965
cisplatin	Cisplatin	D002945	15663-27-1	CITED2	10370	Homo sapiens	9606	TP53 affects the reaction [CITED2 results in decreased susceptibility to Cisplatin]	affects^reaction|decreases^response to substance	21660965
cisplatin	Cisplatin	D002945	15663-27-1	CIZ1	25792	Homo sapiens	9606	Cisplatin inhibits the reaction [Piroxicam results in increased expression of CIZ1 mRNA]	decreases^reaction|increases^expression	21858171
cisplatin	Cisplatin	D002945	15663-27-1	CKMT1B	1159	Homo sapiens	9606	CKMT1B protein affects the susceptibility to Cisplatin	affects^response to substance	16217747
cisplatin	Cisplatin	D002945	15663-27-1	CKS2	1164	Homo sapiens	9606	Cisplatin promotes the reaction [Piroxicam results in decreased expression of CKS2 mRNA]	decreases^expression|increases^reaction	21858171
cisplatin	Cisplatin	D002945	15663-27-1	CLCN3	1182	Homo sapiens	9606	[5-nitro-2-(3-phenylpropylamino)benzoic acid results in increased expression of CLCN3 mRNA] which results in decreased susceptibility to Cisplatin	decreases^response to substance|increases^expression	21538933
cisplatin	Cisplatin	D002945	15663-27-1	CLDN7	1366	Homo sapiens	9606	CLDN7 protein results in decreased susceptibility to Cisplatin	decreases^response to substance	21134740
cisplatin	Cisplatin	D002945	15663-27-1	CLEC16A	23274	Homo sapiens	9606	Cisplatin results in decreased expression of CLEC16A mRNA	decreases^expression	19561079
cisplatin	Cisplatin	D002945	15663-27-1	CLOCK	9575	Homo sapiens	9606	Cisplatin results in decreased expression of CLOCK protein	decreases^expression	21157427
cisplatin	Cisplatin	D002945	15663-27-1	CLP1	10978	Homo sapiens	9606	Cisplatin results in increased expression of CLP1 mRNA	increases^expression	19561079
cisplatin	Cisplatin	D002945	15663-27-1	CLU	1191	Homo sapiens	9606	CLU protein results in decreased susceptibility to Cisplatin	decreases^response to substance	15955107
cisplatin	Cisplatin	D002945	15663-27-1	CMBL	134147	Homo sapiens	9606	Cisplatin results in increased expression of CMBL mRNA	increases^expression	19561079
cisplatin	Cisplatin	D002945	15663-27-1	CMIP	80790	Homo sapiens	9606	Cisplatin results in decreased expression of CMIP mRNA	decreases^expression	19561079
cisplatin	Cisplatin	D002945	15663-27-1	CMSS1	84319	Homo sapiens	9606	Cisplatin results in increased expression of CMSS1 mRNA	increases^expression	19561079
cisplatin	Cisplatin	D002945	15663-27-1	CMTM8	152189	Homo sapiens	9606	Cisplatin results in decreased expression of CMTM8 mRNA	decreases^expression	19561079
cisplatin	Cisplatin	D002945	15663-27-1	CNIH3	149111	Homo sapiens	9606	Cisplatin results in decreased expression of CNIH3 mRNA	decreases^expression	19561079
cisplatin	Cisplatin	D002945	15663-27-1	CNIH3	149111	Homo sapiens	9606	Cisplatin results in increased expression of CNIH3 mRNA	increases^expression	19561079
cisplatin	Cisplatin	D002945	15663-27-1	CNK	36952	Homo sapiens	9606	Cisplatin results in increased expression of CNK mRNA	increases^expression	19561079
cisplatin	Cisplatin	D002945	15663-27-1	CNN3	1266	Homo sapiens	9606	Cisplatin inhibits the reaction [Piroxicam results in decreased expression of CNN3 mRNA]	decreases^expression|decreases^reaction	21858171
cisplatin	Cisplatin	D002945	15663-27-1	CNTF	1270	Homo sapiens	9606	Folic Acid affects the reaction [Cisplatin affects the expression of CNTF mRNA]	affects^expression|affects^reaction	16898872
cisplatin	Cisplatin	D002945	15663-27-1	CNTNAP2	26047	Homo sapiens	9606	CNTNAP2 protein affects the susceptibility to Cisplatin	affects^response to substance	16217747
cisplatin	Cisplatin	D002945	15663-27-1	COL11A2	1302	Homo sapiens	9606	COL11A2 protein affects the susceptibility to Cisplatin	affects^response to substance	16217747
cisplatin	Cisplatin	D002945	15663-27-1	COL13A1	1305	Homo sapiens	9606	Cisplatin results in decreased expression of COL13A1 mRNA	decreases^expression	19561079
cisplatin	Cisplatin	D002945	15663-27-1	COL4A5	1287	Homo sapiens	9606	COL4A5 protein affects the susceptibility to Cisplatin	affects^response to substance	16217747
cisplatin	Cisplatin	D002945	15663-27-1	COPS5	10987	Homo sapiens	9606	COPS5 results in increased susceptibility to Cisplatin	increases^response to substance	21755009
cisplatin	Cisplatin	D002945	15663-27-1	CORO1C	23603	Homo sapiens	9606	CORO1C protein affects the susceptibility to Cisplatin	affects^response to substance	16217747
cisplatin	Cisplatin	D002945	15663-27-1	CPSF1	29894	Homo sapiens	9606	[Piroxicam co-treated with Cisplatin] results in increased expression of CPSF1 mRNA	affects^cotreatment|increases^expression	21858171
cisplatin	Cisplatin	D002945	15663-27-1	CREBBP	1387	Homo sapiens	9606	Cisplatin results in decreased expression of CREBBP protein	decreases^expression	17498666
cisplatin	Cisplatin	D002945	15663-27-1	CRELD2	79174	Homo sapiens	9606	Cisplatin results in increased expression of CRELD2 mRNA	increases^expression	19561079
cisplatin	Cisplatin	D002945	15663-27-1	CRK	1398	Homo sapiens	9606	[Piroxicam co-treated with Cisplatin] results in decreased expression of CRK mRNA	affects^cotreatment|decreases^expression	21858171
cisplatin	Cisplatin	D002945	15663-27-1	CRSP8	496548	Homo sapiens	9606	Cisplatin results in decreased expression of CRSP8 mRNA	decreases^expression	19561079
cisplatin	Cisplatin	D002945	15663-27-1	CSDA	8531	Homo sapiens	9606	[Piroxicam co-treated with Cisplatin] results in decreased expression of CSDA mRNA	affects^cotreatment|decreases^expression	21858171
cisplatin	Cisplatin	D002945	15663-27-1	CSNK1A1	1452	Homo sapiens	9606	Cisplatin inhibits the reaction [Piroxicam results in increased expression of CSNK1A1 mRNA]	decreases^reaction|increases^expression	21858171
cisplatin	Cisplatin	D002945	15663-27-1	CSNK2A2	1459	Homo sapiens	9606	[Piroxicam co-treated with Cisplatin] results in decreased expression of CSNK2A2 mRNA	affects^cotreatment|decreases^expression	21858171
cisplatin	Cisplatin	D002945	15663-27-1	CSPP1	79848	Homo sapiens	9606	CSPP1 results in increased susceptibility to Cisplatin	increases^response to substance	21755009
cisplatin	Cisplatin	D002945	15663-27-1	CST3	1471	Homo sapiens	9606	Cimetidine inhibits the reaction [Cisplatin results in increased expression of CST3]	decreases^reaction|increases^expression	22525860
cisplatin	Cisplatin	D002945	15663-27-1	CST3	1471	Homo sapiens	9606	Cisplatin results in increased expression of CST3	increases^expression	22525860
cisplatin	Cisplatin	D002945	15663-27-1	CST3	1471	Homo sapiens	9606	SLC22A2 gene polymorphism inhibits the reaction [Cisplatin results in increased expression of CST3]	decreases^reaction|increases^expression	22525860
cisplatin	Cisplatin	D002945	15663-27-1	CTAGE4	100128553	Homo sapiens	9606	CTAGE4 protein affects the susceptibility to Cisplatin	affects^response to substance	16217747
cisplatin	Cisplatin	D002945	15663-27-1	CTDSP1	58190	Homo sapiens	9606	CTDSP1 protein results in decreased susceptibility to Cisplatin	decreases^response to substance	16734730
cisplatin	Cisplatin	D002945	15663-27-1	CTH	1491	Homo sapiens	9606	Cisplatin results in increased expression of CTH mRNA	increases^expression	19561079
cisplatin	Cisplatin	D002945	15663-27-1	CTH	1491	Homo sapiens	9606	CTH protein affects the susceptibility to Cisplatin	affects^response to substance	16217747
cisplatin	Cisplatin	D002945	15663-27-1	CTNNAL1	8727	Homo sapiens	9606	CTNNAL1 protein affects the susceptibility to Cisplatin	affects^response to substance	16217747
cisplatin	Cisplatin	D002945	15663-27-1	CTNNB1	1499	Homo sapiens	9606	Cisplatin results in increased expression of CTNNB1 protein	increases^expression	20074550
cisplatin	Cisplatin	D002945	15663-27-1	CTNNB1	1499	Homo sapiens	9606	CTNNB1 results in decreased susceptibility to Cisplatin	decreases^response to substance	22000491
cisplatin	Cisplatin	D002945	15663-27-1	CWC27	10283	Homo sapiens	9606	Cisplatin results in decreased expression of CWC27 mRNA	decreases^expression	19561079
cisplatin	Cisplatin	D002945	15663-27-1	CXCL1	2919	Homo sapiens	9606	CD4 mutant form inhibits the reaction [[Cisplatin co-treated with IL33] results in increased expression of CXCL1]	affects^cotreatment|decreases^reaction|increases^expression	21949094
cisplatin	Cisplatin	D002945	15663-27-1	CXCL1	2919	Homo sapiens	9606	[Cisplatin co-treated with IL33] results in increased expression of CXCL1	affects^cotreatment|increases^expression	21949094
cisplatin	Cisplatin	D002945	15663-27-1	CXCL2	2920	Homo sapiens	9606	CXCL2 protein promotes the reaction [Cisplatin results in increased activity of CASP9 protein]	increases^activity|increases^reaction	21271225
cisplatin	Cisplatin	D002945	15663-27-1	CXCL2	2920	Homo sapiens	9606	CXCL2 protein results in increased susceptibility to Cisplatin	increases^response to substance	21271225
cisplatin	Cisplatin	D002945	15663-27-1	CXCR4	7852	Homo sapiens	9606	[Cisplatin co-treated with panobinostat] affects the expression of CXCR4 mRNA	affects^cotreatment|affects^expression	21791302
cisplatin	Cisplatin	D002945	15663-27-1	CYCS	54205	Homo sapiens	9606	Cisplatin affects the localization of CYCS protein	affects^localization	16009487|21527773
cisplatin	Cisplatin	D002945	15663-27-1	CYFIP2	26999	Homo sapiens	9606	[Piroxicam co-treated with Cisplatin] results in decreased expression of CYFIP2 mRNA	affects^cotreatment|decreases^expression	21858171
cisplatin	Cisplatin	D002945	15663-27-1	CYLD	1540	Homo sapiens	9606	CYLD protein results in increased susceptibility to Cisplatin	increases^response to substance	21109933
cisplatin	Cisplatin	D002945	15663-27-1	CYLN2	81594	Homo sapiens	9606	Cisplatin results in decreased expression of CYLN2 mRNA	decreases^expression	19561079
cisplatin	Cisplatin	D002945	15663-27-1	CYP1A1	1543	Homo sapiens	9606	Cisplatin inhibits the reaction [Tetrachlorodibenzodioxin results in increased activity of CYP1A1 protein]	decreases^reaction|increases^activity	18493746
cisplatin	Cisplatin	D002945	15663-27-1	CYP1A2	1544	Homo sapiens	9606	Cisplatin inhibits the reaction [Tetrachlorodibenzodioxin results in increased activity of CYP1A2 protein]	decreases^reaction|increases^activity	18493746
cisplatin	Cisplatin	D002945	15663-27-1	CYP2A6	1548	Homo sapiens	9606	CYP2A6 gene polymorphism results in decreased susceptibility to [Cisplatin co-treated with S 1 (combination)]	affects^cotreatment|decreases^response to substance	21364592
cisplatin	Cisplatin	D002945	15663-27-1	CYP2C9	1559	Homo sapiens	9606	CYP2C9 protein affects the susceptibility to Cisplatin	affects^response to substance	16217747
cisplatin	Cisplatin	D002945	15663-27-1	CYP3A4	1576	Homo sapiens	9606	Cisplatin results in increased expression of CYP3A4 mRNA	increases^expression	15650019
cisplatin	Cisplatin	D002945	15663-27-1	CYP3A4	1576	Homo sapiens	9606	Cisplatin results in increased expression of CYP3A4 protein	increases^expression	15650019
cisplatin	Cisplatin	D002945	15663-27-1	CYP3A4	1576	Homo sapiens	9606	CYP3A4 gene affects the susceptibility to [Carmustine co-treated with Cyclophosphamide co-treated with Cisplatin]	affects^cotreatment|affects^response to substance	16087946
cisplatin	Cisplatin	D002945	15663-27-1	CYP3A5	1577	Homo sapiens	9606	CYP3A5 gene affects the susceptibility to [Carmustine co-treated with Cyclophosphamide co-treated with Cisplatin]	affects^cotreatment|affects^response to substance	16087946
cisplatin	Cisplatin	D002945	15663-27-1	D6S2723E	10470	Homo sapiens	9606	D6S2723E protein affects the susceptibility to Cisplatin	affects^response to substance	16217747
cisplatin	Cisplatin	D002945	15663-27-1	DAB2	1601	Homo sapiens	9606	DAB2 protein results in decreased susceptibility to Cisplatin	decreases^response to substance	16734730
cisplatin	Cisplatin	D002945	15663-27-1	DAD1	1603	Homo sapiens	9606	Cisplatin results in increased expression of DAD1 mRNA	increases^expression	21278888
cisplatin	Cisplatin	D002945	15663-27-1	DAD1	1603	Homo sapiens	9606	Cisplatin results in increased expression of DAD1 protein	increases^expression	21278888
cisplatin	Cisplatin	D002945	15663-27-1	DAPK3	1613	Homo sapiens	9606	DAPK3 results in increased susceptibility to Cisplatin	increases^response to substance	21775533
cisplatin	Cisplatin	D002945	15663-27-1	DBF4	10926	Homo sapiens	9606	Cisplatin inhibits the reaction [Piroxicam results in increased expression of DBF4 mRNA]	decreases^reaction|increases^expression	21858171
cisplatin	Cisplatin	D002945	15663-27-1	DBNL	28988	Homo sapiens	9606	Cisplatin results in decreased expression of DBNL mRNA	decreases^expression	19561079
cisplatin	Cisplatin	D002945	15663-27-1	DCBLD2	131566	Homo sapiens	9606	Cisplatin results in decreased expression of DCBLD2 mRNA	decreases^expression	19561079
cisplatin	Cisplatin	D002945	15663-27-1	DCLRE1C	64421	Homo sapiens	9606	DCLRE1C results in decreased susceptibility to Cisplatin	decreases^response to substance	21785230
cisplatin	Cisplatin	D002945	15663-27-1	DDB2	1643	Homo sapiens	9606	Cisplatin results in increased expression of DDB2 mRNA	increases^expression	21532991
cisplatin	Cisplatin	D002945	15663-27-1	DDB2	1643	Homo sapiens	9606	[Piroxicam co-treated with Cisplatin] results in decreased expression of DDB2 mRNA	affects^cotreatment|decreases^expression	21858171
cisplatin	Cisplatin	D002945	15663-27-1	DDEF2	100286728	Homo sapiens	9606	Cisplatin results in decreased expression of DDEF2 mRNA	decreases^expression	19561079
cisplatin	Cisplatin	D002945	15663-27-1	DDIT3	1649	Homo sapiens	9606	Cisplatin inhibits the reaction [Piroxicam results in decreased expression of DDIT3 mRNA]	decreases^expression|decreases^reaction	21858171
cisplatin	Cisplatin	D002945	15663-27-1	DDIT3	1649	Homo sapiens	9606	Cisplatin promotes the reaction [DDIT3 protein binds to ADRM1 promoter]	affects^binding|increases^reaction	20959455
cisplatin	Cisplatin	D002945	15663-27-1	DDIT3	1649	Homo sapiens	9606	Cisplatin promotes the reaction [DDIT3 protein binds to TP63 protein]	affects^binding|increases^reaction	20959455
cisplatin	Cisplatin	D002945	15663-27-1	DDIT3	1649	Homo sapiens	9606	Cisplatin results in decreased expression of DDIT3 mRNA	decreases^expression	19561079
cisplatin	Cisplatin	D002945	15663-27-1	DDIT3	1649	Homo sapiens	9606	Cisplatin results in increased expression of DDIT3 mRNA	increases^expression	11592233|17355264
cisplatin	Cisplatin	D002945	15663-27-1	DDIT3	1649	Homo sapiens	9606	Cisplatin results in increased expression of DDIT3 protein	increases^expression	20959455
cisplatin	Cisplatin	D002945	15663-27-1	DDIT3	1649	Homo sapiens	9606	Nicotine inhibits the reaction [Cisplatin results in increased expression of DDIT3 mRNA]	decreases^reaction|increases^expression	11592233
cisplatin	Cisplatin	D002945	15663-27-1	DDIT3	1649	Homo sapiens	9606	TP63 protein alternative form promotes the reaction [Cisplatin results in increased expression of DDIT3 protein]	increases^expression|increases^reaction	20959455
cisplatin	Cisplatin	D002945	15663-27-1	DDIT4	54541	Homo sapiens	9606	Cisplatin results in increased expression of DDIT4 mRNA	increases^expression	21532991
cisplatin	Cisplatin	D002945	15663-27-1	DDIT4	54541	Homo sapiens	9606	Cisplatin results in increased expression of DDIT4 protein	increases^expression	21274007
cisplatin	Cisplatin	D002945	15663-27-1	DDR1	780	Homo sapiens	9606	DDR1 protein affects the susceptibility to Cisplatin	affects^response to substance	16217747
cisplatin	Cisplatin	D002945	15663-27-1	DEK	7913	Homo sapiens	9606	DEK protein results in decreased susceptibility to Cisplatin	decreases^response to substance	21291860
cisplatin	Cisplatin	D002945	15663-27-1	DENND1A	57706	Homo sapiens	9606	Cisplatin results in decreased expression of DENND1A mRNA	decreases^expression	19561079
cisplatin	Cisplatin	D002945	15663-27-1	DENND4A	10260	Homo sapiens	9606	DENND4A protein results in decreased susceptibility to Cisplatin	decreases^response to substance	16734730
cisplatin	Cisplatin	D002945	15663-27-1	DEPTOR	64798	Homo sapiens	9606	DEPTOR protein affects the susceptibility to Cisplatin	affects^response to substance	16217747
cisplatin	Cisplatin	D002945	15663-27-1	DHFR	1719	Homo sapiens	9606	Cisplatin promotes the reaction [Piroxicam results in decreased expression of DHFR mRNA]	decreases^expression|increases^reaction	21858171
cisplatin	Cisplatin	D002945	15663-27-1	DHRS2	10202	Homo sapiens	9606	Cisplatin results in decreased expression of DHRS2 mRNA	decreases^expression	19561079
cisplatin	Cisplatin	D002945	15663-27-1	DIABLO	56616	Homo sapiens	9606	DIABLO protein results in increased susceptibility to Cisplatin	increases^response to substance	18031615|21204765
cisplatin	Cisplatin	D002945	15663-27-1	DIAPH2	1730	Homo sapiens	9606	Cisplatin results in decreased expression of DIAPH2 mRNA	decreases^expression	19561079
cisplatin	Cisplatin	D002945	15663-27-1	DICER1	23405	Homo sapiens	9606	Cisplatin results in increased expression of DICER1 protein	increases^expression	21274007
cisplatin	Cisplatin	D002945	15663-27-1	DICER1	23405	Homo sapiens	9606	[Cisplatin results in increased expression of DICER1 protein] which results in increased metabolism of MIR630	increases^expression|increases^metabolic processing	21274007
cisplatin	Cisplatin	D002945	15663-27-1	DICER1	23405	Homo sapiens	9606	[Cisplatin results in increased phosphorylation of TP63 protein alternative form] promotes the reaction [TP63 protein modified form binds to DICER1 promoter]	affects^binding|increases^phosphorylation|increases^reaction	21274007
cisplatin	Cisplatin	D002945	15663-27-1	DICER1	23405	Homo sapiens	9606	[Cisplatin results in increased phosphorylation of TP63 protein alternative form] promotes the reaction [TP63 protein modified form results in increased expression of DICER1 mRNA]	increases^expression|increases^phosphorylation|increases^reaction	21274007
cisplatin	Cisplatin	D002945	15663-27-1	DICER1	23405	Homo sapiens	9606	DICER1 protein results in increased susceptibility to Cisplatin	increases^response to substance	21274007
cisplatin	Cisplatin	D002945	15663-27-1	DKK1	22943	Homo sapiens	9606	DKK1 protein affects the susceptibility to Cisplatin	affects^response to substance	16217747
cisplatin	Cisplatin	D002945	15663-27-1	DLGAP5	9787	Homo sapiens	9606	Cisplatin inhibits the reaction [Piroxicam results in increased expression of DLGAP5 mRNA]	decreases^reaction|increases^expression	21858171
cisplatin	Cisplatin	D002945	15663-27-1	DLX2	1746	Homo sapiens	9606	Cisplatin results in increased expression of DLX2 mRNA	increases^expression	19561079
cisplatin	Cisplatin	D002945	15663-27-1	DMBT1	1755	Homo sapiens	9606	DMBT1 protein affects the susceptibility to Cisplatin	affects^response to substance	16217747
cisplatin	Cisplatin	D002945	15663-27-1	DNAJA1	3301	Homo sapiens	9606	Cisplatin affects the reaction [Piroxicam results in decreased expression of DNAJA1 mRNA]	affects^reaction|decreases^expression	21858171
cisplatin	Cisplatin	D002945	15663-27-1	DNAJB11	51726	Homo sapiens	9606	Cisplatin results in increased expression of DNAJB11 mRNA	increases^expression	19561079
cisplatin	Cisplatin	D002945	15663-27-1	DNAJB12	54788	Homo sapiens	9606	[Piroxicam co-treated with Cisplatin] results in increased expression of DNAJB12 mRNA	affects^cotreatment|increases^expression	21858171
cisplatin	Cisplatin	D002945	15663-27-1	DNAJB4	11080	Homo sapiens	9606	Cisplatin results in increased expression of DNAJB4 mRNA	increases^expression	19561079
cisplatin	Cisplatin	D002945	15663-27-1	DNAJC9	23234	Homo sapiens	9606	Cisplatin inhibits the reaction [Piroxicam results in increased expression of DNAJC9 mRNA]	decreases^reaction|increases^expression	21858171
cisplatin	Cisplatin	D002945	15663-27-1	DNM1L	10059	Homo sapiens	9606	DNM1L protein results in increased susceptibility to Cisplatin	increases^response to substance	21160028
cisplatin	Cisplatin	D002945	15663-27-1	DNMT1	1786	Homo sapiens	9606	DNMT1 protein results in decreased susceptibility to Cisplatin	decreases^response to substance	18314485|21458988
cisplatin	Cisplatin	D002945	15663-27-1	DNMT3B	1789	Homo sapiens	9606	DNMT3B protein results in decreased susceptibility to Cisplatin	decreases^response to substance	18314485
cisplatin	Cisplatin	D002945	15663-27-1	DOCK1	1793	Homo sapiens	9606	Cisplatin results in decreased expression of DOCK1 mRNA	decreases^expression	19561079
cisplatin	Cisplatin	D002945	15663-27-1	DOK1	1796	Homo sapiens	9606	DOK1 results in increased susceptibility to Cisplatin	increases^response to substance	21856257
cisplatin	Cisplatin	D002945	15663-27-1	DONSON	29980	Homo sapiens	9606	Cisplatin promotes the reaction [Piroxicam results in increased expression of DONSON mRNA]	increases^expression|increases^reaction	21858171
cisplatin	Cisplatin	D002945	15663-27-1	DPM1	8813	Homo sapiens	9606	[Piroxicam co-treated with Cisplatin] results in decreased expression of DPM1 mRNA	affects^cotreatment|decreases^expression	21858171
cisplatin	Cisplatin	D002945	15663-27-1	DPP3	10072	Homo sapiens	9606	Cisplatin inhibits the reaction [Piroxicam results in decreased expression of DPP3 mRNA]	decreases^expression|decreases^reaction	21858171
cisplatin	Cisplatin	D002945	15663-27-1	DPYD	1806	Homo sapiens	9606	[Cisplatin co-treated with Fluorouracil] results in decreased expression of DPYD mRNA	affects^cotreatment|decreases^expression	15737843
cisplatin	Cisplatin	D002945	15663-27-1	DPYD	1806	Homo sapiens	9606	Cisplatin inhibits the reaction [Fluorouracil results in increased expression of DPYD mRNA]	decreases^reaction|increases^expression	16568373
cisplatin	Cisplatin	D002945	15663-27-1	DPYD	1806	Homo sapiens	9606	Cisplatin results in decreased activity of DPYD protein	decreases^activity	16568373
cisplatin	Cisplatin	D002945	15663-27-1	DPYD	1806	Homo sapiens	9606	Cisplatin results in decreased expression of DPYD mRNA	decreases^expression	16568373
cisplatin	Cisplatin	D002945	15663-27-1	DPYD	1806	Homo sapiens	9606	DPYD protein affects the susceptibility to Cisplatin	affects^response to substance	18728667
cisplatin	Cisplatin	D002945	15663-27-1	DPYD	1806	Homo sapiens	9606	PCNA mRNA affects the reaction [DPYD mRNA affects the susceptibility to Cisplatin]	affects^reaction|affects^response to substance	16685392
cisplatin	Cisplatin	D002945	15663-27-1	DPYD	1806	Homo sapiens	9606	[Piroxicam co-treated with Cisplatin] results in increased expression of DPYD mRNA	affects^cotreatment|increases^expression	21858171
cisplatin	Cisplatin	D002945	15663-27-1	DPYD	1806	Homo sapiens	9606	[TYMP protein co-treated with DPYD protein] affects the susceptibility to Cisplatin	affects^cotreatment|affects^response to substance	18728667
cisplatin	Cisplatin	D002945	15663-27-1	DRAP1	10589	Homo sapiens	9606	DRAP1 protein affects the susceptibility to Cisplatin	affects^response to substance	16217747
cisplatin	Cisplatin	D002945	15663-27-1	DSPP	1834	Homo sapiens	9606	DSPP protein results in decreased susceptibility to Cisplatin	decreases^response to substance	21103065
cisplatin	Cisplatin	D002945	15663-27-1	DST	667	Homo sapiens	9606	DST protein affects the susceptibility to Cisplatin	affects^response to substance	16217747
cisplatin	Cisplatin	D002945	15663-27-1	DTNA	1837	Homo sapiens	9606	Cisplatin results in decreased expression of DTNA mRNA	decreases^expression	19561079
cisplatin	Cisplatin	D002945	15663-27-1	DTYMK	1841	Homo sapiens	9606	Cisplatin promotes the reaction [Piroxicam results in decreased expression of DTYMK mRNA]	decreases^expression|increases^reaction	21858171
cisplatin	Cisplatin	D002945	15663-27-1	DUSP1	1843	Homo sapiens	9606	Cisplatin promotes the reaction [Piroxicam results in decreased expression of DUSP1 mRNA]	decreases^expression|increases^reaction	21858171
cisplatin	Cisplatin	D002945	15663-27-1	DUSP1	1843	Homo sapiens	9606	Cisplatin results in increased expression of DUSP1 mRNA	increases^expression	21532991
cisplatin	Cisplatin	D002945	15663-27-1	DUSP11	8446	Homo sapiens	9606	Cisplatin results in increased expression of DUSP11 mRNA	increases^expression	19561079
cisplatin	Cisplatin	D002945	15663-27-1	DUSP14	11072	Homo sapiens	9606	Cisplatin results in increased expression of DUSP14 mRNA	increases^expression	19561079|21532991
cisplatin	Cisplatin	D002945	15663-27-1	DUSP23	54935	Homo sapiens	9606	[Cisplatin co-treated with panobinostat] affects the expression of DUSP23 mRNA	affects^cotreatment|affects^expression	21791302
cisplatin	Cisplatin	D002945	15663-27-1	DUSP6	1848	Homo sapiens	9606	Cisplatin results in decreased expression of DUSP6 protein	decreases^expression	21996734
cisplatin	Cisplatin	D002945	15663-27-1	DUSP6	1848	Homo sapiens	9606	DUSP6 inhibits the reaction [Cisplatin results in increased expression of ERCC1 mRNA]	decreases^reaction|increases^expression	21996734
cisplatin	Cisplatin	D002945	15663-27-1	DUSP6	1848	Homo sapiens	9606	DUSP6 inhibits the reaction [Cisplatin results in increased expression of ERCC4 mRNA]	decreases^reaction|increases^expression	21996734
cisplatin	Cisplatin	D002945	15663-27-1	DUSP6	1848	Homo sapiens	9606	DUSP6 protein results in decreased susceptibility to Cisplatin	decreases^response to substance	21499306
cisplatin	Cisplatin	D002945	15663-27-1	DUSP6	1848	Homo sapiens	9606	DUSP6 results in increased susceptibility to Cisplatin	increases^response to substance	21996734
cisplatin	Cisplatin	D002945	15663-27-1	DUT	1854	Homo sapiens	9606	Cisplatin inhibits the reaction [Piroxicam results in decreased expression of DUT mRNA]	decreases^expression|decreases^reaction	21858171
cisplatin	Cisplatin	D002945	15663-27-1	DYM	54808	Homo sapiens	9606	Cisplatin results in decreased expression of DYM mRNA	decreases^expression	19561079
cisplatin	Cisplatin	D002945	15663-27-1	DYNC1H1	1778	Homo sapiens	9606	[Piroxicam co-treated with Cisplatin] results in decreased expression of DYNC1H1 mRNA	affects^cotreatment|decreases^expression	21858171
cisplatin	Cisplatin	D002945	15663-27-1	DYRK2	8445	Homo sapiens	9606	Cisplatin results in increased expression of DYRK2 protein	increases^expression	21660965
cisplatin	Cisplatin	D002945	15663-27-1	DYRK3	8444	Homo sapiens	9606	Cisplatin results in increased expression of DYRK3 mRNA	increases^expression	19561079
cisplatin	Cisplatin	D002945	15663-27-1	E2F1	1869	Homo sapiens	9606	Cisplatin results in increased acetylation of E2F1 protein	increases^acetylation	21157427
cisplatin	Cisplatin	D002945	15663-27-1	E2F1	1869	Homo sapiens	9606	Cisplatin results in increased expression of E2F1 mRNA	increases^expression	21603599
cisplatin	Cisplatin	D002945	15663-27-1	E2F3	1871	Homo sapiens	9606	Cisplatin results in decreased expression of E2F3 mRNA	decreases^expression	21603599
cisplatin	Cisplatin	D002945	15663-27-1	ECE2	9718	Homo sapiens	9606	Cisplatin results in decreased expression of ECE2 mRNA	decreases^expression	19561079
cisplatin	Cisplatin	D002945	15663-27-1	ECT2	1894	Homo sapiens	9606	Cisplatin promotes the reaction [Piroxicam results in decreased expression of ECT2 mRNA]	decreases^expression|increases^reaction	21858171
cisplatin	Cisplatin	D002945	15663-27-1	EDN1	1906	Homo sapiens	9606	Cisplatin results in increased expression of EDN1 mRNA	increases^expression	21674241
cisplatin	Cisplatin	D002945	15663-27-1	EDN1	1906	Homo sapiens	9606	cyclo(Trp-Asp-Pro-Val-Leu) inhibits the reaction [EDN1 results in decreased susceptibility to Cisplatin]	decreases^reaction|decreases^response to substance	21656314
cisplatin	Cisplatin	D002945	15663-27-1	EDN1	1906	Homo sapiens	9606	EDN1 results in decreased susceptibility to Cisplatin	decreases^response to substance	21656314
cisplatin	Cisplatin	D002945	15663-27-1	EDN2	1907	Homo sapiens	9606	Folic Acid affects the reaction [Cisplatin affects the expression of EDN2 mRNA]	affects^expression|affects^reaction	16898872
cisplatin	Cisplatin	D002945	15663-27-1	EDNRA	1909	Homo sapiens	9606	EDNRA protein affects the susceptibility to Cisplatin	affects^response to substance	17032313
cisplatin	Cisplatin	D002945	15663-27-1	EEF2	1938	Homo sapiens	9606	EEF2 protein modified form results in decreased susceptibility to Cisplatin	decreases^response to substance	21554491
cisplatin	Cisplatin	D002945	15663-27-1	EEFSEC	60678	Homo sapiens	9606	Cisplatin results in decreased expression of EEFSEC mRNA	decreases^expression	19561079
cisplatin	Cisplatin	D002945	15663-27-1	EGF	1950	Homo sapiens	9606	4-(5-benzo(1,3)dioxol-5-yl-4-pyridin-2-yl-1H-imidazol-2-yl)benzamide inhibits the reaction [EGF promotes the reaction [TGFB1 results in decreased susceptibility to Cisplatin]]	decreases^reaction|decreases^response to substance|increases^reaction	21613822
cisplatin	Cisplatin	D002945	15663-27-1	EGF	1950	Homo sapiens	9606	anthra(1,9-cd)pyrazol-6(2H)-one inhibits the reaction [EGF promotes the reaction [TGFB1 results in decreased susceptibility to Cisplatin]]	decreases^reaction|decreases^response to substance|increases^reaction	21613822
cisplatin	Cisplatin	D002945	15663-27-1	EGF	1950	Homo sapiens	9606	EGF promotes the reaction [TGFB1 results in decreased susceptibility to Cisplatin]	decreases^response to substance|increases^reaction	21613822
cisplatin	Cisplatin	D002945	15663-27-1	EGF	1950	Homo sapiens	9606	erlotinib inhibits the reaction [EGF promotes the reaction [TGFB1 results in decreased susceptibility to Cisplatin]]	decreases^reaction|decreases^response to substance|increases^reaction	21613822
cisplatin	Cisplatin	D002945	15663-27-1	EGF	1950	Homo sapiens	9606	U 0126 inhibits the reaction [EGF promotes the reaction [TGFB1 results in decreased susceptibility to Cisplatin]]	decreases^reaction|decreases^response to substance|increases^reaction	21613822
cisplatin	Cisplatin	D002945	15663-27-1	EGFR	1956	Homo sapiens	9606	[Cisplatin co-treated with Fluorouracil] results in decreased expression of EGFR mRNA	affects^cotreatment|decreases^expression	15737843
cisplatin	Cisplatin	D002945	15663-27-1	EGFR	1956	Homo sapiens	9606	Cisplatin promotes the reaction [HER3 protein binds to EGFR protein]	affects^binding|increases^reaction	20726858
cisplatin	Cisplatin	D002945	15663-27-1	EGFR	1956	Homo sapiens	9606	Cisplatin results in increased phosphorylation of and results in increased uptake of EGFR protein	increases^phosphorylation|increases^uptake	21431282
cisplatin	Cisplatin	D002945	15663-27-1	EGFR	1956	Homo sapiens	9606	Cisplatin results in increased phosphorylation of EGFR protein	increases^phosphorylation	20726858
cisplatin	Cisplatin	D002945	15663-27-1	EGFR	1956	Homo sapiens	9606	EGFR gene mutant form results in increased susceptibility to [gemcitabine co-treated with Cisplatin co-treated with erlotinib]	affects^cotreatment|increases^response to substance	21541241
cisplatin	Cisplatin	D002945	15663-27-1	EGFR	1956	Homo sapiens	9606	EGFR mRNA results in decreased susceptibility to Cisplatin	decreases^response to substance	18337622
cisplatin	Cisplatin	D002945	15663-27-1	EGFR	1956	Homo sapiens	9606	EGFR protein affects the susceptibility to Cisplatin	affects^response to substance	21431282
cisplatin	Cisplatin	D002945	15663-27-1	EGFR	1956	Homo sapiens	9606	EGFR protein results in increased susceptibility to Cisplatin	increases^response to substance	21324906
cisplatin	Cisplatin	D002945	15663-27-1	EGFR	1956	Homo sapiens	9606	EGFR results in decreased susceptibility to Cisplatin	decreases^response to substance	21849418|21909139
cisplatin	Cisplatin	D002945	15663-27-1	EGFR	1956	Homo sapiens	9606	EGFR results in increased susceptibility to [Cisplatin co-treated with docetaxel co-treated with Fluorouracil]	affects^cotreatment|increases^response to substance	21947696
cisplatin	Cisplatin	D002945	15663-27-1	EGFR	1956	Homo sapiens	9606	[ITGB1 protein results in increased activity of EGFR protein] which results in decreased susceptibility to Cisplatin	decreases^response to substance|increases^activity	21478906
cisplatin	Cisplatin	D002945	15663-27-1	EGFR	1956	Homo sapiens	9606	LRIG1 protein inhibits the reaction [Cisplatin results in increased phosphorylation of and affects the localization of EGFR protein]	affects^localization|decreases^reaction|increases^phosphorylation	21431282
cisplatin	Cisplatin	D002945	15663-27-1	EGFR	1956	Homo sapiens	9606	[TNFSF10 protein co-treated with Cisplatin] results in decreased expression of EGFR protein	affects^cotreatment|decreases^expression	21252285
cisplatin	Cisplatin	D002945	15663-27-1	EGR1	1958	Homo sapiens	9606	EGR1 protein promotes the reaction [Cisplatin results in increased activity of CASP9 protein]	increases^activity|increases^reaction	21271225
cisplatin	Cisplatin	D002945	15663-27-1	EGR1	1958	Homo sapiens	9606	EGR1 protein results in increased susceptibility to Cisplatin	increases^response to substance	21271225
cisplatin	Cisplatin	D002945	15663-27-1	EHBP1	23301	Homo sapiens	9606	Cisplatin results in decreased expression of EHBP1 mRNA	decreases^expression	19561079
cisplatin	Cisplatin	D002945	15663-27-1	EID2	163126	Homo sapiens	9606	Cisplatin results in decreased expression of EID2 mRNA	decreases^expression	19561079
cisplatin	Cisplatin	D002945	15663-27-1	EIF1	10209	Homo sapiens	9606	Cisplatin results in increased expression of EIF1 mRNA	increases^expression	21603599
cisplatin	Cisplatin	D002945	15663-27-1	EIF1AX	1964	Homo sapiens	9606	Cisplatin affects the reaction [Piroxicam results in decreased expression of EIF1AX mRNA]	affects^reaction|decreases^expression	21858171
cisplatin	Cisplatin	D002945	15663-27-1	EIF3A	8661	Homo sapiens	9606	EIF3A results in increased susceptibility to Cisplatin	increases^response to substance	21610145|21625209
cisplatin	Cisplatin	D002945	15663-27-1	EIF4B	1975	Homo sapiens	9606	Cisplatin results in increased phosphorylation of EIF4B protein	increases^phosphorylation	21742020
cisplatin	Cisplatin	D002945	15663-27-1	EIF4B	1975	Homo sapiens	9606	[Piroxicam co-treated with Cisplatin] results in decreased expression of EIF4B mRNA	affects^cotreatment|decreases^expression	21858171
cisplatin	Cisplatin	D002945	15663-27-1	EIF4E	1977	Homo sapiens	9606	Cisplatin affects the reaction [Piroxicam results in decreased expression of EIF4E mRNA]	affects^reaction|decreases^expression	21858171
cisplatin	Cisplatin	D002945	15663-27-1	EIF4EBP1	1978	Homo sapiens	9606	Cisplatin promotes the reaction [temsirolimus inhibits the reaction [MTOR protein results in increased phosphorylation of EIF4EBP1 protein]]	decreases^reaction|increases^phosphorylation|increases^reaction	21358348
cisplatin	Cisplatin	D002945	15663-27-1	EIF4EBP1	1978	Homo sapiens	9606	Cisplatin results in decreased phosphorylation of EIF4EBP1 protein	decreases^phosphorylation	18058806
cisplatin	Cisplatin	D002945	15663-27-1	EIF4EBP1	1978	Homo sapiens	9606	[Sirolimus co-treated with Cisplatin] results in decreased phosphorylation of EIF4EBP1 protein	affects^cotreatment|decreases^phosphorylation	19853261
cisplatin	Cisplatin	D002945	15663-27-1	EIF4EBP1	1978	Homo sapiens	9606	Sirolimus promotes the reaction [Cisplatin results in decreased phosphorylation of EIF4EBP1 protein]	decreases^phosphorylation|increases^reaction	18058806
cisplatin	Cisplatin	D002945	15663-27-1	EIF4G3	8672	Homo sapiens	9606	Cisplatin results in decreased expression of EIF4G3 mRNA	decreases^expression	19561079
cisplatin	Cisplatin	D002945	15663-27-1	EIF5B	9669	Homo sapiens	9606	Cisplatin affects the reaction [Piroxicam results in decreased expression of EIF5B mRNA]	affects^reaction|decreases^expression	21858171
cisplatin	Cisplatin	D002945	15663-27-1	ELMO2	63916	Homo sapiens	9606	Cisplatin results in increased expression of ELMO2 protein	increases^expression	16803524
cisplatin	Cisplatin	D002945	15663-27-1	ELOVL6	79071	Homo sapiens	9606	Cisplatin results in decreased expression of ELOVL6 mRNA	decreases^expression	19561079
cisplatin	Cisplatin	D002945	15663-27-1	EMP3	2014	Homo sapiens	9606	Cisplatin results in increased expression of EMP3 mRNA	increases^expression	21278888
cisplatin	Cisplatin	D002945	15663-27-1	EMP3	2014	Homo sapiens	9606	Cisplatin results in increased expression of EMP3 protein	increases^expression	21278888
cisplatin	Cisplatin	D002945	15663-27-1	EMP3	2014	Homo sapiens	9606	EMP3 protein affects the susceptibility to Cisplatin	affects^response to substance	16217747
cisplatin	Cisplatin	D002945	15663-27-1	EMX2	2018	Homo sapiens	9606	EMX2 protein results in increased susceptibility to Cisplatin	increases^response to substance	20697358
cisplatin	Cisplatin	D002945	15663-27-1	ENPP2	5168	Homo sapiens	9606	ENPP2 protein affects the susceptibility to Cisplatin	affects^response to substance	16217747
cisplatin	Cisplatin	D002945	15663-27-1	ENTPD6	955	Homo sapiens	9606	[CDH1 protein binds to ENTPD6 protein] which results in decreased susceptibility to Cisplatin	affects^binding|decreases^response to substance	21519793
cisplatin	Cisplatin	D002945	15663-27-1	EP300	2033	Homo sapiens	9606	Cisplatin promotes the reaction [APEX1 protein modified form binds to [YBX1 protein binds to EP300 protein]]	affects^binding|increases^reaction	20856196
cisplatin	Cisplatin	D002945	15663-27-1	EP300	2033	Homo sapiens	9606	Cisplatin promotes the reaction [[APEX1 protein modified form promotes the reaction [YBX1 protein binds to EP300 protein]] which binds to ABCB1 promoter]	affects^binding|increases^reaction	20856196
cisplatin	Cisplatin	D002945	15663-27-1	EP300	2033	Homo sapiens	9606	Cisplatin results in decreased expression of EP300 protein	decreases^expression	17498666
cisplatin	Cisplatin	D002945	15663-27-1	EP300	2033	Homo sapiens	9606	EP300 protein promotes the reaction [Cisplatin results in increased acetylation of APEX1 protein]	increases^acetylation|increases^reaction	20856196
cisplatin	Cisplatin	D002945	15663-27-1	EPB41L2	2037	Homo sapiens	9606	Cisplatin inhibits the reaction [Piroxicam results in decreased expression of EPB41L2 mRNA]	decreases^expression|decreases^reaction	21858171
cisplatin	Cisplatin	D002945	15663-27-1	EPCAM	4072	Homo sapiens	9606	Cisplatin results in increased expression of EPCAM protein	increases^expression	21618587
cisplatin	Cisplatin	D002945	15663-27-1	EPHB2	2048	Homo sapiens	9606	Cisplatin results in decreased expression of EPHB2 mRNA	decreases^expression	19561079
cisplatin	Cisplatin	D002945	15663-27-1	EPO	2056	Homo sapiens	9606	Cisplatin inhibits the reaction [cobaltous chloride results in increased expression of EPO mRNA]	decreases^reaction|increases^expression	11090055
cisplatin	Cisplatin	D002945	15663-27-1	EPO	2056	Homo sapiens	9606	Cisplatin inhibits the reaction [cobaltous chloride results in increased expression of EPO protein]	decreases^reaction|increases^expression	11090055
cisplatin	Cisplatin	D002945	15663-27-1	EPO	2056	Homo sapiens	9606	Cisplatin inhibits the reaction [Oxygen deficiency results in increased expression of EPO mRNA]	decreases^reaction|increases^expression	11090055
cisplatin	Cisplatin	D002945	15663-27-1	EPO	2056	Homo sapiens	9606	Cisplatin inhibits the reaction [Oxygen deficiency results in increased expression of EPO protein]	decreases^reaction|increases^expression	11090055
cisplatin	Cisplatin	D002945	15663-27-1	EPO	2056	Homo sapiens	9606	EPO protein inhibits the reaction [Cisplatin results in decreased abundance of Glutathione]	decreases^abundance|decreases^reaction	22013135
cisplatin	Cisplatin	D002945	15663-27-1	EPO	2056	Homo sapiens	9606	EPO protein inhibits the reaction [Cisplatin results in increased activity of CAT protein]	decreases^reaction|increases^activity	22013135
cisplatin	Cisplatin	D002945	15663-27-1	ERBB2	2064	Homo sapiens	9606	2-(4-morpholinyl)-8-phenyl-4H-1-benzopyran-4-one inhibits the reaction [ERBB2 results in decreased susceptibility to Cisplatin]	decreases^reaction|decreases^response to substance	21712253
cisplatin	Cisplatin	D002945	15663-27-1	ERBB2	2064	Homo sapiens	9606	3-(4-methylphenylsulfonyl)-2-propenenitrile inhibits the reaction [ERBB2 results in decreased susceptibility to Cisplatin]	decreases^reaction|decreases^response to substance	21712253
cisplatin	Cisplatin	D002945	15663-27-1	ERBB2	2064	Homo sapiens	9606	[Cisplatin co-treated with Fluorouracil] results in decreased expression of ERBB2 mRNA	affects^cotreatment|decreases^expression	15737843
cisplatin	Cisplatin	D002945	15663-27-1	ERBB2	2064	Homo sapiens	9606	ERBB2 mRNA results in decreased susceptibility to Cisplatin	decreases^response to substance	18337622
cisplatin	Cisplatin	D002945	15663-27-1	ERBB2	2064	Homo sapiens	9606	ERBB2 protein affects the susceptibility to Cisplatin	affects^response to substance	10327070
cisplatin	Cisplatin	D002945	15663-27-1	ERBB2	2064	Homo sapiens	9606	ERBB2 results in decreased susceptibility to Cisplatin	decreases^response to substance	21712253
cisplatin	Cisplatin	D002945	15663-27-1	ERBB2	2064	Homo sapiens	9606	[ERBB2 results in increased expression of ABCG2] which results in decreased susceptibility to Cisplatin	decreases^response to substance|increases^expression	21712253
cisplatin	Cisplatin	D002945	15663-27-1	ERCC1	2067	Homo sapiens	9606	Cisplatin affects the expression of ERCC1 mRNA	affects^expression	21750216
cisplatin	Cisplatin	D002945	15663-27-1	ERCC1	2067	Homo sapiens	9606	[Cisplatin co-treated with Fluorouracil] results in decreased expression of ERCC1 mRNA	affects^cotreatment|decreases^expression	15737843
cisplatin	Cisplatin	D002945	15663-27-1	ERCC1	2067	Homo sapiens	9606	Cisplatin results in increased expression of ERCC1 mRNA	increases^expression	21165580|21315089|21996734
cisplatin	Cisplatin	D002945	15663-27-1	ERCC1	2067	Homo sapiens	9606	Cisplatin results in increased expression of ERCC1 protein	increases^expression	21315089|21996734
cisplatin	Cisplatin	D002945	15663-27-1	ERCC1	2067	Homo sapiens	9606	[Curcumin results in decreased expression of ERCC1 protein] which results in increased susceptibility to Cisplatin	decreases^expression|increases^response to substance	21493726
cisplatin	Cisplatin	D002945	15663-27-1	ERCC1	2067	Homo sapiens	9606	DUSP6 inhibits the reaction [Cisplatin results in increased expression of ERCC1 mRNA]	decreases^reaction|increases^expression	21996734
cisplatin	Cisplatin	D002945	15663-27-1	ERCC1	2067	Homo sapiens	9606	ERCC1 gene polymorphism affects the susceptibility to [Cisplatin co-treated with S 1 (combination)]	affects^cotreatment|affects^response to substance	21364592
cisplatin	Cisplatin	D002945	15663-27-1	ERCC1	2067	Homo sapiens	9606	ERCC1 gene polymorphism affects the susceptibility to [gefitinib co-treated with Cisplatin]	affects^cotreatment|affects^response to substance	21264830
cisplatin	Cisplatin	D002945	15663-27-1	ERCC1	2067	Homo sapiens	9606	ERCC1 gene SNP results in increased susceptibility to [Cisplatin co-treated with Fluorouracil]	affects^cotreatment|increases^response to substance	21286668
cisplatin	Cisplatin	D002945	15663-27-1	ERCC1	2067	Homo sapiens	9606	ERCC1 mRNA affects the susceptibility to [Cisplatin co-treated with Fluorouracil]	affects^cotreatment|affects^response to substance	15173087
cisplatin	Cisplatin	D002945	15663-27-1	ERCC1	2067	Homo sapiens	9606	ERCC1 mutant form inhibits the reaction [RRM2 mutant form promotes the reaction [TP53 mutant form promotes the reaction [Cisplatin results in increased phosphorylation of H2AFX protein]]]	decreases^reaction|increases^phosphorylation|increases^reaction	21875941
cisplatin	Cisplatin	D002945	15663-27-1	ERCC1	2067	Homo sapiens	9606	ERCC1 mutant form inhibits the reaction [TP53 mutant form promotes the reaction [Cisplatin results in increased phosphorylation of H2AFX protein]]	decreases^reaction|increases^phosphorylation|increases^reaction	21875941
cisplatin	Cisplatin	D002945	15663-27-1	ERCC1	2067	Homo sapiens	9606	ERCC1 mutant form promotes the reaction [RRM2 mutant form promotes the reaction [TP53 mutant form results in increased susceptibility to Cisplatin]]	increases^reaction|increases^response to substance	21875941
cisplatin	Cisplatin	D002945	15663-27-1	ERCC1	2067	Homo sapiens	9606	[ERCC1 protein binds to ERCC4 protein] which results in decreased susceptibility to Cisplatin	affects^binding|decreases^response to substance	21357694
cisplatin	Cisplatin	D002945	15663-27-1	ERCC1	2067	Homo sapiens	9606	ERCC1 protein results in decreased susceptibility to Cisplatin	decreases^response to substance	21093896|21315089
cisplatin	Cisplatin	D002945	15663-27-1	ERCC1	2067	Homo sapiens	9606	ERCC1 protein results in increased susceptibility to Cisplatin	increases^response to substance	21076943
cisplatin	Cisplatin	D002945	15663-27-1	ERCC1	2067	Homo sapiens	9606	ERCC1 results in decreased susceptibility to Cisplatin	decreases^response to substance	21621119
cisplatin	Cisplatin	D002945	15663-27-1	ERCC1	2067	Homo sapiens	9606	PD 0325901 inhibits the reaction [Cisplatin results in increased expression of ERCC1 mRNA]	decreases^reaction|increases^expression	21996734
cisplatin	Cisplatin	D002945	15663-27-1	ERCC1	2067	Homo sapiens	9606	PD 0325901 inhibits the reaction [Cisplatin results in increased expression of ERCC1 protein]	decreases^reaction|increases^expression	21996734
cisplatin	Cisplatin	D002945	15663-27-1	ERCC2	2068	Homo sapiens	9606	ERCC2 mRNA results in decreased susceptibility to Cisplatin	decreases^response to substance	15882455
cisplatin	Cisplatin	D002945	15663-27-1	ERCC4	2072	Homo sapiens	9606	Cisplatin results in increased expression of ERCC4 mRNA	increases^expression	21996734
cisplatin	Cisplatin	D002945	15663-27-1	ERCC4	2072	Homo sapiens	9606	Cisplatin results in increased expression of ERCC4 protein	increases^expression	21996734
cisplatin	Cisplatin	D002945	15663-27-1	ERCC4	2072	Homo sapiens	9606	DUSP6 inhibits the reaction [Cisplatin results in increased expression of ERCC4 mRNA]	decreases^reaction|increases^expression	21996734
cisplatin	Cisplatin	D002945	15663-27-1	ERCC4	2072	Homo sapiens	9606	[ERCC1 protein binds to ERCC4 protein] which results in decreased susceptibility to Cisplatin	affects^binding|decreases^response to substance	21357694
cisplatin	Cisplatin	D002945	15663-27-1	ERCC4	2072	Homo sapiens	9606	ERCC4 mRNA results in decreased susceptibility to Cisplatin	decreases^response to substance	21452186
cisplatin	Cisplatin	D002945	15663-27-1	ERCC5	2073	Homo sapiens	9606	ERCC5 mRNA results in decreased susceptibility to Cisplatin	decreases^response to substance	21452186
cisplatin	Cisplatin	D002945	15663-27-1	ERCC5	2073	Homo sapiens	9606	ERCC5 mutant form inhibits the reaction [RRM2 mutant form promotes the reaction [TP53 mutant form promotes the reaction [Cisplatin results in increased phosphorylation of H2AFX protein]]]	decreases^reaction|increases^phosphorylation|increases^reaction	21875941
cisplatin	Cisplatin	D002945	15663-27-1	ERCC6	2074	Homo sapiens	9606	ERCC6 protein inhibits the reaction [Cisplatin results in increased activity of ATR protein]	decreases^reaction|increases^activity	21324906
cisplatin	Cisplatin	D002945	15663-27-1	ERCC6	2074	Homo sapiens	9606	ERCC6 protein inhibits the reaction [Cisplatin results in increased activity of CHEK1 protein]	decreases^reaction|increases^activity	21324906
cisplatin	Cisplatin	D002945	15663-27-1	ERCC6	2074	Homo sapiens	9606	ERCC6 protein inhibits the reaction [Cisplatin results in increased activity of CHEK2 protein]	decreases^reaction|increases^activity	21324906
cisplatin	Cisplatin	D002945	15663-27-1	ERCC6	2074	Homo sapiens	9606	ERCC6 protein inhibits the reaction [Cisplatin results in increased phosphorylation of H2AFX protein]	decreases^reaction|increases^phosphorylation	21324906
cisplatin	Cisplatin	D002945	15663-27-1	ERCC6	2074	Homo sapiens	9606	ERCC6 protein mutant form results in increased susceptibility to Cisplatin	increases^response to substance	21324906
cisplatin	Cisplatin	D002945	15663-27-1	ERRFI1	54206	Homo sapiens	9606	Cisplatin results in decreased expression of ERRFI1 mRNA	decreases^expression	19561079
cisplatin	Cisplatin	D002945	15663-27-1	ERVFRD-1	405754	Homo sapiens	9606	ERVFRD-1 protein affects the susceptibility to Cisplatin	affects^response to substance	16217747
cisplatin	Cisplatin	D002945	15663-27-1	ESM1	11082	Homo sapiens	9606	Cisplatin inhibits the reaction [Piroxicam results in decreased expression of ESM1 mRNA]	decreases^expression|decreases^reaction	21858171
cisplatin	Cisplatin	D002945	15663-27-1	ESR1	2099	Homo sapiens	9606	ESR1 results in increased susceptibility to Cisplatin	increases^response to substance	21767602
cisplatin	Cisplatin	D002945	15663-27-1	ESR1	2099	Homo sapiens	9606	Estrone inhibits the reaction [ESR1 results in increased susceptibility to Cisplatin]	decreases^reaction|increases^response to substance	21767602
cisplatin	Cisplatin	D002945	15663-27-1	ESR2	2100	Homo sapiens	9606	ESR2 protein inhibits the reaction [Cisplatin results in increased expression of and results in increased phosphorylation of CDC25C protein]	decreases^reaction|increases^expression|increases^phosphorylation	20623183
cisplatin	Cisplatin	D002945	15663-27-1	ESR2	2100	Homo sapiens	9606	ESR2 protein inhibits the reaction [Cisplatin results in increased expression of BRCA1 mRNA]	decreases^reaction|increases^expression	20623183
cisplatin	Cisplatin	D002945	15663-27-1	ESR2	2100	Homo sapiens	9606	ESR2 protein inhibits the reaction [Cisplatin results in increased expression of BRCA1 protein]	decreases^reaction|increases^expression	20623183
cisplatin	Cisplatin	D002945	15663-27-1	ESR2	2100	Homo sapiens	9606	ESR2 protein inhibits the reaction [Cisplatin results in increased phosphorylation of CHEK1 protein]	decreases^reaction|increases^phosphorylation	20623183
cisplatin	Cisplatin	D002945	15663-27-1	ESR2	2100	Homo sapiens	9606	ESR2 protein promotes the reaction [Cisplatin results in increased expression of CASP2 protein]	increases^expression|increases^reaction	20623183
cisplatin	Cisplatin	D002945	15663-27-1	ESR2	2100	Homo sapiens	9606	ESR2 protein promotes the reaction [Cisplatin results in increased expression of CASP3 protein]	increases^expression|increases^reaction	20623183
cisplatin	Cisplatin	D002945	15663-27-1	ESR2	2100	Homo sapiens	9606	ESR2 protein results in increased susceptibility to Cisplatin	increases^response to substance	20623183
cisplatin	Cisplatin	D002945	15663-27-1	ESR2	2100	Homo sapiens	9606	TP53 protein inhibits the reaction [ESR2 protein results in increased susceptibility to Cisplatin]	decreases^reaction|increases^response to substance	20623183
cisplatin	Cisplatin	D002945	15663-27-1	ETS2	2114	Homo sapiens	9606	Cisplatin results in increased expression of ETS2 mRNA	increases^expression	21603599
cisplatin	Cisplatin	D002945	15663-27-1	ETV4	2118	Homo sapiens	9606	Cisplatin results in increased expression of ETV4 mRNA	increases^expression	16061661
cisplatin	Cisplatin	D002945	15663-27-1	ETV6	2120	Homo sapiens	9606	Cisplatin results in decreased expression of ETV6 mRNA	decreases^expression	19561079
cisplatin	Cisplatin	D002945	15663-27-1	EVI1	733318	Homo sapiens	9606	Cisplatin results in decreased expression of EVI1 mRNA	decreases^expression	19561079
cisplatin	Cisplatin	D002945	15663-27-1	EXOC3	11336	Homo sapiens	9606	[Piroxicam co-treated with Cisplatin] results in increased expression of EXOC3 mRNA	affects^cotreatment|increases^expression	21858171
cisplatin	Cisplatin	D002945	15663-27-1	EXOC6	54536	Homo sapiens	9606	Cisplatin results in decreased expression of EXOC6 mRNA	decreases^expression	19561079
cisplatin	Cisplatin	D002945	15663-27-1	EXOSC8	11340	Homo sapiens	9606	[Piroxicam co-treated with Cisplatin] results in decreased expression of EXOSC8 mRNA	affects^cotreatment|decreases^expression	21858171
cisplatin	Cisplatin	D002945	15663-27-1	EXT1	2131	Homo sapiens	9606	Cisplatin results in decreased expression of EXT1 mRNA	decreases^expression	19561079
cisplatin	Cisplatin	D002945	15663-27-1	F8A3	474384	Homo sapiens	9606	F8A3 protein affects the susceptibility to Cisplatin	affects^response to substance	16217747
cisplatin	Cisplatin	D002945	15663-27-1	FABP1	2168	Homo sapiens	9606	Bezafibrate inhibits the reaction [Cisplatin results in decreased expression of FABP1 protein]	decreases^expression|decreases^reaction	18368030
cisplatin	Cisplatin	D002945	15663-27-1	FABP1	2168	Homo sapiens	9606	[Cisplatin co-treated with Bezafibrate] results in increased expression of FABP1 mRNA	affects^cotreatment|increases^expression	18368030
cisplatin	Cisplatin	D002945	15663-27-1	FABP1	2168	Homo sapiens	9606	Cisplatin results in decreased expression of FABP1 protein	decreases^expression	18368030
cisplatin	Cisplatin	D002945	15663-27-1	FABP1	2168	Homo sapiens	9606	Cisplatin results in increased expression of FABP1 mRNA	increases^expression	18368030
cisplatin	Cisplatin	D002945	15663-27-1	FADS1	3992	Homo sapiens	9606	FADS1 protein affects the susceptibility to Cisplatin	affects^response to substance	16217747
cisplatin	Cisplatin	D002945	15663-27-1	FAF1	11124	Homo sapiens	9606	Cisplatin results in decreased expression of FAF1 mRNA	decreases^expression	19561079
cisplatin	Cisplatin	D002945	15663-27-1	FAM125B	89853	Homo sapiens	9606	Cisplatin results in decreased expression of FAM125B mRNA	decreases^expression	21603599
cisplatin	Cisplatin	D002945	15663-27-1	FAM129A	116496	Homo sapiens	9606	FAM129A protein affects the susceptibility to Cisplatin	affects^response to substance	16217747
cisplatin	Cisplatin	D002945	15663-27-1	FAM132B	151176	Homo sapiens	9606	Cisplatin results in increased expression of FAM132B mRNA	increases^expression	19561079
cisplatin	Cisplatin	D002945	15663-27-1	FAM13A	10144	Homo sapiens	9606	FAM13A protein affects the susceptibility to Cisplatin	affects^response to substance	16217747
cisplatin	Cisplatin	D002945	15663-27-1	FAM168A	23201	Homo sapiens	9606	FAM168A protein inhibits the reaction [Cisplatin results in increased cleavage of CASP3 protein]	decreases^reaction|increases^cleavage	21334329
cisplatin	Cisplatin	D002945	15663-27-1	FAM168A	23201	Homo sapiens	9606	FAM168A protein results in decreased susceptibility to Cisplatin	decreases^response to substance	21334329
cisplatin	Cisplatin	D002945	15663-27-1	FAM171A1	221061	Homo sapiens	9606	Cisplatin results in decreased expression of FAM171A1 mRNA	decreases^expression	19561079
cisplatin	Cisplatin	D002945	15663-27-1	FAM20C	56975	Homo sapiens	9606	Cisplatin results in decreased expression of FAM20C mRNA	decreases^expression	19561079
cisplatin	Cisplatin	D002945	15663-27-1	FAM212B	55924	Homo sapiens	9606	Cisplatin results in increased expression of FAM212B mRNA	increases^expression	21532991
cisplatin	Cisplatin	D002945	15663-27-1	FAM46A	55603	Homo sapiens	9606	Cisplatin results in increased expression of FAM46A mRNA	increases^expression	19561079
cisplatin	Cisplatin	D002945	15663-27-1	FAM46A	55603	Homo sapiens	9606	FAM46A protein affects the susceptibility to Cisplatin	affects^response to substance	16217747
cisplatin	Cisplatin	D002945	15663-27-1	FAM53C	51307	Homo sapiens	9606	Cisplatin results in increased expression of FAM53C mRNA	increases^expression	19561079
cisplatin	Cisplatin	D002945	15663-27-1	FAM60A	58516	Homo sapiens	9606	[Piroxicam co-treated with Cisplatin] results in increased expression of FAM60A mRNA	affects^cotreatment|increases^expression	21858171
cisplatin	Cisplatin	D002945	15663-27-1	FAM78B	149297	Homo sapiens	9606	Cisplatin results in decreased expression of FAM78B mRNA	decreases^expression	19561079
cisplatin	Cisplatin	D002945	15663-27-1	FAN1	22909	Homo sapiens	9606	FAN1 protein results in decreased susceptibility to Cisplatin	decreases^response to substance	21115814
cisplatin	Cisplatin	D002945	15663-27-1	FANCC	2176	Homo sapiens	9606	Cisplatin results in decreased expression of FANCC mRNA	decreases^expression	19561079|21532991
cisplatin	Cisplatin	D002945	15663-27-1	FANCC	2176	Homo sapiens	9606	FANCC protein results in decreased susceptibility to Cisplatin	decreases^response to substance	21115814
cisplatin	Cisplatin	D002945	15663-27-1	FANCC	2176	Homo sapiens	9606	FANCC protein results in increased susceptibility to Cisplatin	increases^response to substance	16243825
cisplatin	Cisplatin	D002945	15663-27-1	FANCD2	2177	Homo sapiens	9606	Cisplatin results in increased ubiquitination of FANCD2 protein	increases^ubiquitination	21324906
cisplatin	Cisplatin	D002945	15663-27-1	FANCG	2189	Homo sapiens	9606	Cisplatin results in increased expression of FANCG mRNA	increases^expression	16061661
cisplatin	Cisplatin	D002945	15663-27-1	FANCG	2189	Homo sapiens	9606	FANCG protein results in increased susceptibility to Cisplatin	increases^response to substance	16243825
cisplatin	Cisplatin	D002945	15663-27-1	FAR2	55711	Homo sapiens	9606	Cisplatin results in decreased expression of FAR2 mRNA	decreases^expression	19561079
cisplatin	Cisplatin	D002945	15663-27-1	FARS2	10667	Homo sapiens	9606	Cisplatin results in decreased expression of FARS2 mRNA	decreases^expression	19561079
cisplatin	Cisplatin	D002945	15663-27-1	FAS	355	Homo sapiens	9606	[[Cisplatin co-treated with 2,5,7,8-tetramethyl-2R-(4R,8R,12-trimethyltridecyl)chroman-6-yloxy acetic acid] results in increased expression of TP73 protein] which results in increased expression of FAS mRNA	affects^cotreatment|increases^expression	21214929
cisplatin	Cisplatin	D002945	15663-27-1	FAS	355	Homo sapiens	9606	[[Cisplatin co-treated with 2,5,7,8-tetramethyl-2R-(4R,8R,12-trimethyltridecyl)chroman-6-yloxy acetic acid] results in increased expression of TP73 protein] which results in increased expression of FAS protein	affects^cotreatment|increases^expression	21214929
cisplatin	Cisplatin	D002945	15663-27-1	FAS	355	Homo sapiens	9606	[[[Cisplatin co-treated with 2,5,7,8-tetramethyl-2R-(4R,8R,12-trimethyltridecyl)chroman-6-yloxy acetic acid] results in increased phosphorylation of ABL1 protein] which results in increased expression of TP73 protein] which results in increased expression of FAS protein	affects^cotreatment|increases^expression|increases^phosphorylation	21214929
cisplatin	Cisplatin	D002945	15663-27-1	FAS	355	Homo sapiens	9606	Cisplatin promotes the reaction [TP53 protein results in increased expression of FAS mRNA]	increases^expression|increases^reaction	21532991
cisplatin	Cisplatin	D002945	15663-27-1	FAS	355	Homo sapiens	9606	Cisplatin results in increased expression of and affects the localization of FAS protein	affects^localization|increases^expression	17305640
cisplatin	Cisplatin	D002945	15663-27-1	FAS	355	Homo sapiens	9606	Cisplatin results in increased expression of FAS	increases^expression	16166447
cisplatin	Cisplatin	D002945	15663-27-1	FAS	355	Homo sapiens	9606	Cisplatin results in increased expression of FAS mRNA	increases^expression	11099651|16957513|20878077|21532991
cisplatin	Cisplatin	D002945	15663-27-1	FAS	355	Homo sapiens	9606	Cisplatin results in increased expression of FAS protein	increases^expression	16957513|21052098
cisplatin	Cisplatin	D002945	15663-27-1	FAS	355	Homo sapiens	9606	ING4 protein promotes the reaction [Cisplatin results in increased expression of FAS protein]	increases^expression|increases^reaction	21052098
cisplatin	Cisplatin	D002945	15663-27-1	FAS	355	Homo sapiens	9606	[nutlin 3 promotes the reaction [FAS protein binds to FASLG protein]] which results in increased susceptibility to Cisplatin	affects^binding|increases^reaction|increases^response to substance	21509038
cisplatin	Cisplatin	D002945	15663-27-1	FAS	355	Homo sapiens	9606	Y 27632 inhibits the reaction [Cisplatin results in increased expression of FAS mRNA]	decreases^reaction|increases^expression	20878077
cisplatin	Cisplatin	D002945	15663-27-1	FAS	355	Homo sapiens	9606	[YAP1 protein promotes the reaction [[Cisplatin co-treated with 2,5,7,8-tetramethyl-2R-(4R,8R,12-trimethyltridecyl)chroman-6-yloxy acetic acid] results in increased expression of TP73 protein]] which results in increased expression of FAS protein	affects^cotreatment|increases^expression|increases^reaction	21214929
cisplatin	Cisplatin	D002945	15663-27-1	FASLG	356	Homo sapiens	9606	Acetylcysteine inhibits the reaction [[Cisplatin co-treated with FASLG protein] results in decreased expression of BID protein]	affects^cotreatment|decreases^expression|decreases^reaction	17574045
cisplatin	Cisplatin	D002945	15663-27-1	FASLG	356	Homo sapiens	9606	Acetylcysteine inhibits the reaction [[Cisplatin co-treated with FASLG protein] results in increased activity of CASP3 protein]	affects^cotreatment|decreases^reaction|increases^activity	17574045
cisplatin	Cisplatin	D002945	15663-27-1	FASLG	356	Homo sapiens	9606	Acetylcysteine inhibits the reaction [[Cisplatin co-treated with FASLG protein] results in increased activity of CASP8 protein]	affects^cotreatment|decreases^reaction|increases^activity	17574045
cisplatin	Cisplatin	D002945	15663-27-1	FASLG	356	Homo sapiens	9606	Acetylcysteine inhibits the reaction [[Cisplatin co-treated with FASLG protein] results in increased activity of CASP9 protein]	affects^cotreatment|decreases^reaction|increases^activity	17574045
cisplatin	Cisplatin	D002945	15663-27-1	FASLG	356	Homo sapiens	9606	BCL2 protein inhibits the reaction [[Cisplatin co-treated with FASLG protein] results in increased activity of CASP3 protein]	affects^cotreatment|decreases^reaction|increases^activity	17574045
cisplatin	Cisplatin	D002945	15663-27-1	FASLG	356	Homo sapiens	9606	BCL2 protein inhibits the reaction [[Cisplatin co-treated with FASLG protein] results in increased activity of CASP8 protein]	affects^cotreatment|decreases^reaction|increases^activity	17574045
cisplatin	Cisplatin	D002945	15663-27-1	FASLG	356	Homo sapiens	9606	BCL2 protein inhibits the reaction [[Cisplatin co-treated with FASLG protein] results in increased activity of CASP9 protein]	affects^cotreatment|decreases^reaction|increases^activity	17574045
cisplatin	Cisplatin	D002945	15663-27-1	FASLG	356	Homo sapiens	9606	benzyloxycarbonyl-leucyl-glutamyl-histidyl-aspartic acid fluoromethyl ketone inhibits the reaction [[Cisplatin co-treated with FASLG protein] results in increased activity of CASP3 protein]	affects^cotreatment|decreases^reaction|increases^activity	17574045
cisplatin	Cisplatin	D002945	15663-27-1	FASLG	356	Homo sapiens	9606	benzyloxycarbonyl-leucyl-glutamyl-histidyl-aspartic acid fluoromethyl ketone inhibits the reaction [[Cisplatin co-treated with FASLG protein] results in increased activity of CASP8 protein]	affects^cotreatment|decreases^reaction|increases^activity	17574045
cisplatin	Cisplatin	D002945	15663-27-1	FASLG	356	Homo sapiens	9606	benzyloxycarbonyl-leucyl-glutamyl-histidyl-aspartic acid fluoromethyl ketone inhibits the reaction [[Cisplatin co-treated with FASLG protein] results in increased activity of CASP9 protein]	affects^cotreatment|decreases^reaction|increases^activity	17574045
cisplatin	Cisplatin	D002945	15663-27-1	FASLG	356	Homo sapiens	9606	[Cisplatin co-treated with FASLG protein] results in decreased expression of BID protein	affects^cotreatment|decreases^expression	17574045
cisplatin	Cisplatin	D002945	15663-27-1	FASLG	356	Homo sapiens	9606	[Cisplatin co-treated with FASLG protein] results in increased activity of CASP3 protein	affects^cotreatment|increases^activity	17574045
cisplatin	Cisplatin	D002945	15663-27-1	FASLG	356	Homo sapiens	9606	[Cisplatin co-treated with FASLG protein] results in increased activity of CASP8 protein	affects^cotreatment|increases^activity	17574045
cisplatin	Cisplatin	D002945	15663-27-1	FASLG	356	Homo sapiens	9606	[Cisplatin co-treated with FASLG protein] results in increased activity of CASP9 protein	affects^cotreatment|increases^activity	17574045
cisplatin	Cisplatin	D002945	15663-27-1	FASLG	356	Homo sapiens	9606	[Cisplatin co-treated with fisetin] results in increased expression of FASLG protein	affects^cotreatment|increases^expression	21216935
cisplatin	Cisplatin	D002945	15663-27-1	FASLG	356	Homo sapiens	9606	Cisplatin results in increased expression of FASLG mRNA	increases^expression	16957513|20878077
cisplatin	Cisplatin	D002945	15663-27-1	FASLG	356	Homo sapiens	9606	Cisplatin results in increased expression of FASLG protein	increases^expression	16957513|21216935
cisplatin	Cisplatin	D002945	15663-27-1	FASLG	356	Homo sapiens	9606	[nutlin 3 promotes the reaction [FAS protein binds to FASLG protein]] which results in increased susceptibility to Cisplatin	affects^binding|increases^reaction|increases^response to substance	21509038
cisplatin	Cisplatin	D002945	15663-27-1	FASLG	356	Homo sapiens	9606	Y 27632 inhibits the reaction [Cisplatin results in increased expression of FASLG mRNA]	decreases^reaction|increases^expression	20878077
cisplatin	Cisplatin	D002945	15663-27-1	FASN	2194	Homo sapiens	9606	[4-methylene-2-octyl-5-oxofuran-3-carboxylic acid co-treated with Cisplatin] results in decreased expression of FASN protein	affects^cotreatment|decreases^expression	21442130
cisplatin	Cisplatin	D002945	15663-27-1	FASN	2194	Homo sapiens	9606	[4-methylene-2-octyl-5-oxofuran-3-carboxylic acid results in decreased activity of FASN protein] which results in increased susceptibility to Cisplatin	decreases^activity|increases^response to substance	21442130
cisplatin	Cisplatin	D002945	15663-27-1	FASTK	10922	Homo sapiens	9606	Cisplatin results in increased expression of FASTK mRNA	increases^expression	21278888
cisplatin	Cisplatin	D002945	15663-27-1	FASTK	10922	Homo sapiens	9606	Cisplatin results in increased expression of FASTK protein	increases^expression	21278888
cisplatin	Cisplatin	D002945	15663-27-1	FBL	2091	Homo sapiens	9606	Cisplatin analog affects the localization of FBL protein	affects^localization	10942594
cisplatin	Cisplatin	D002945	15663-27-1	FBXO9	26268	Homo sapiens	9606	Cisplatin inhibits the reaction [Piroxicam results in increased expression of FBXO9 mRNA]	decreases^reaction|increases^expression	21858171
cisplatin	Cisplatin	D002945	15663-27-1	FCHSD1	89848	Homo sapiens	9606	Cisplatin results in decreased expression of FCHSD1 mRNA	decreases^expression	19561079
cisplatin	Cisplatin	D002945	15663-27-1	FCHSD2	9873	Homo sapiens	9606	Cisplatin results in decreased expression of FCHSD2 mRNA	decreases^expression	21603599
cisplatin	Cisplatin	D002945	15663-27-1	FDFT1	2222	Homo sapiens	9606	Cisplatin promotes the reaction [Piroxicam results in decreased expression of FDFT1 mRNA]	decreases^expression|increases^reaction	21858171
cisplatin	Cisplatin	D002945	15663-27-1	FDXR	2232	Homo sapiens	9606	Cisplatin results in increased expression of FDXR mRNA	increases^expression	19561079|21532991
cisplatin	Cisplatin	D002945	15663-27-1	FDXR	2232	Homo sapiens	9606	[Piroxicam co-treated with Cisplatin] results in decreased expression of FDXR mRNA	affects^cotreatment|decreases^expression	21858171
cisplatin	Cisplatin	D002945	15663-27-1	FEN1	2237	Homo sapiens	9606	Cisplatin inhibits the reaction [Piroxicam results in decreased expression of FEN1 mRNA]	decreases^expression|decreases^reaction	21858171
cisplatin	Cisplatin	D002945	15663-27-1	FEN1	2237	Homo sapiens	9606	FEN1 protein affects the susceptibility to Cisplatin	affects^response to substance	16217747
cisplatin	Cisplatin	D002945	15663-27-1	FGD4	121512	Homo sapiens	9606	Cisplatin results in decreased expression of FGD4 mRNA	decreases^expression	21603599
cisplatin	Cisplatin	D002945	15663-27-1	FGF2	2247	Homo sapiens	9606	Cisplatin affects the reaction [Piroxicam results in decreased expression of FGF2 mRNA]	affects^reaction|decreases^expression	21858171
cisplatin	Cisplatin	D002945	15663-27-1	FGF9	2254	Homo sapiens	9606	FGF9 protein affects the susceptibility to Cisplatin	affects^response to substance	16217747
cisplatin	Cisplatin	D002945	15663-27-1	FGFR2	2263	Homo sapiens	9606	Cisplatin results in decreased expression of FGFR2 mRNA	decreases^expression	21603599
cisplatin	Cisplatin	D002945	15663-27-1	FGFR2	2263	Homo sapiens	9606	FGFR2 protein affects the susceptibility to Cisplatin	affects^response to substance	16217747
cisplatin	Cisplatin	D002945	15663-27-1	FGFR3	2261	Homo sapiens	9606	Cisplatin results in increased expression of FGFR3 mRNA	increases^expression	12066199
cisplatin	Cisplatin	D002945	15663-27-1	FHOD3	80206	Homo sapiens	9606	Cisplatin results in decreased expression of FHOD3 mRNA	decreases^expression	19561079
cisplatin	Cisplatin	D002945	15663-27-1	FKBP2	2286	Homo sapiens	9606	FKBP2 protein affects the susceptibility to Cisplatin	affects^response to substance	16217747
cisplatin	Cisplatin	D002945	15663-27-1	FLII	2314	Homo sapiens	9606	[Piroxicam co-treated with Cisplatin] results in decreased expression of FLII mRNA	affects^cotreatment|decreases^expression	21858171
cisplatin	Cisplatin	D002945	15663-27-1	FLNB	2317	Homo sapiens	9606	Cisplatin results in decreased expression of FLNB mRNA	decreases^expression	19561079
cisplatin	Cisplatin	D002945	15663-27-1	FMNL2	114793	Homo sapiens	9606	Cisplatin results in increased expression of FMNL2 mRNA	increases^expression	19561079
cisplatin	Cisplatin	D002945	15663-27-1	FMOD	2331	Homo sapiens	9606	FMOD protein affects the susceptibility to Cisplatin	affects^response to substance	16217747
cisplatin	Cisplatin	D002945	15663-27-1	FN1	2335	Homo sapiens	9606	FN1 protein results in increased activity of Cisplatin	increases^activity	21567080
cisplatin	Cisplatin	D002945	15663-27-1	FNDC3B	64778	Homo sapiens	9606	Cisplatin results in decreased expression of FNDC3B mRNA	decreases^expression	19561079
cisplatin	Cisplatin	D002945	15663-27-1	FOLR2	2350	Homo sapiens	9606	FOLR2 results in decreased susceptibility to Cisplatin	decreases^response to substance	21571862
cisplatin	Cisplatin	D002945	15663-27-1	FOS	2353	Homo sapiens	9606	Cisplatin results in increased expression of FOS protein	increases^expression	19383537
cisplatin	Cisplatin	D002945	15663-27-1	FOS	2353	Homo sapiens	9606	FOS protein affects the susceptibility to Cisplatin	affects^response to substance	16217747
cisplatin	Cisplatin	D002945	15663-27-1	FOSL1	8061	Homo sapiens	9606	Cisplatin results in increased expression of FOSL1 mRNA	increases^expression	16061661
cisplatin	Cisplatin	D002945	15663-27-1	FOSL1	8061	Homo sapiens	9606	FOSL1 affects the susceptibility to Cisplatin	affects^response to substance	15756446
cisplatin	Cisplatin	D002945	15663-27-1	FOSL1	8061	Homo sapiens	9606	FOSL1 protein affects the susceptibility to Cisplatin	affects^response to substance	16217747
cisplatin	Cisplatin	D002945	15663-27-1	FOXC1	2296	Homo sapiens	9606	Cisplatin results in increased expression of FOXC1 mRNA	increases^expression	19561079
cisplatin	Cisplatin	D002945	15663-27-1	FOXC1	2296	Homo sapiens	9606	FOXC1 protein affects the susceptibility to Cisplatin	affects^response to substance	16217747
cisplatin	Cisplatin	D002945	15663-27-1	FOXF2	2295	Homo sapiens	9606	Cisplatin results in increased expression of FOXF2 mRNA	increases^expression	19561079
cisplatin	Cisplatin	D002945	15663-27-1	FOXM1	2305	Homo sapiens	9606	[Piroxicam co-treated with Cisplatin] results in decreased expression of FOXM1 mRNA	affects^cotreatment|decreases^expression	21858171
cisplatin	Cisplatin	D002945	15663-27-1	FOXO3A	494532	Homo sapiens	9606	Cisplatin inhibits the reaction [[Sirolimus results in increased phosphorylation of AKT1 protein] which results in increased phosphorylation of FOXO3A protein]	decreases^reaction|increases^phosphorylation	21092744
cisplatin	Cisplatin	D002945	15663-27-1	FOXO3A	494532	Homo sapiens	9606	[Cisplatin inhibits the reaction [[Sirolimus results in increased phosphorylation of AKT1 protein] which results in increased phosphorylation of FOXO3A protein]] which results in increased expression of BCL2L11 protein	decreases^reaction|increases^expression|increases^phosphorylation	21092744
cisplatin	Cisplatin	D002945	15663-27-1	FOXO3A	494532	Homo sapiens	9606	[Cisplatin inhibits the reaction [[Sirolimus results in increased phosphorylation of AKT1 protein] which results in increased phosphorylation of FOXO3A protein]] which results in increased expression of CDKN1B protein	decreases^reaction|increases^expression|increases^phosphorylation	21092744
cisplatin	Cisplatin	D002945	15663-27-1	FOXO3A	494532	Homo sapiens	9606	Cisplatin results in decreased phosphorylation of FOXO3A protein	decreases^phosphorylation	21092744
cisplatin	Cisplatin	D002945	15663-27-1	FOXO3A	494532	Homo sapiens	9606	Cisplatin results in increased expression of and results in increased localization of and results in increased activity of FOXO3A protein	increases^activity|increases^expression|increases^localization	21092744
cisplatin	Cisplatin	D002945	15663-27-1	FOXO3A	494532	Homo sapiens	9606	FOXO3A protein results in increased susceptibility to [Cisplatin co-treated with Sirolimus]	affects^cotreatment|increases^response to substance	21092744
cisplatin	Cisplatin	D002945	15663-27-1	FOXO3A	494532	Homo sapiens	9606	Sirolimus promotes the reaction [Cisplatin results in increased expression of and results in increased localization of and results in increased activity of FOXO3A protein]	increases^activity|increases^expression|increases^localization|increases^reaction	21092744
cisplatin	Cisplatin	D002945	15663-27-1	FRAS1	80144	Homo sapiens	9606	[Cisplatin co-treated with panobinostat] affects the expression of FRAS1 mRNA	affects^cotreatment|affects^expression	21791302
cisplatin	Cisplatin	D002945	15663-27-1	FRMD4A	55691	Homo sapiens	9606	Cisplatin results in decreased expression of FRMD4A mRNA	decreases^expression	19561079
cisplatin	Cisplatin	D002945	15663-27-1	FST	10468	Homo sapiens	9606	Cisplatin affects the reaction [Piroxicam results in decreased expression of FST mRNA]	affects^reaction|decreases^expression	21858171
cisplatin	Cisplatin	D002945	15663-27-1	FTLP3	284764	Homo sapiens	9606	FTLP3 protein affects the susceptibility to Cisplatin	affects^response to substance	16217747
cisplatin	Cisplatin	D002945	15663-27-1	FTO	79068	Homo sapiens	9606	Cisplatin results in decreased expression of FTO mRNA	decreases^expression	19561079
cisplatin	Cisplatin	D002945	15663-27-1	FUCA1	2517	Homo sapiens	9606	Cisplatin results in increased expression of FUCA1 mRNA	increases^expression	19561079
cisplatin	Cisplatin	D002945	15663-27-1	FUT8	2530	Homo sapiens	9606	Cisplatin results in decreased expression of FUT8 mRNA	decreases^expression	19561079
cisplatin	Cisplatin	D002945	15663-27-1	FUT8	2530	Homo sapiens	9606	[Piroxicam co-treated with Cisplatin] results in increased expression of FUT8 mRNA	affects^cotreatment|increases^expression	21858171
cisplatin	Cisplatin	D002945	15663-27-1	FYN	2534	Homo sapiens	9606	Cisplatin results in decreased expression of FYN mRNA	decreases^expression	19561079
cisplatin	Cisplatin	D002945	15663-27-1	GADD45A	1647	Homo sapiens	9606	Cisplatin results in increased expression of GADD45A mRNA	increases^expression	16797627|20655883|21532991|21603599
cisplatin	Cisplatin	D002945	15663-27-1	GADD45A	1647	Homo sapiens	9606	Cisplatin results in increased expression of GADD45A protein	increases^expression	19003803|21274007
cisplatin	Cisplatin	D002945	15663-27-1	GADD45A	1647	Homo sapiens	9606	GADD45A protein results in increased susceptibility to Cisplatin	increases^response to substance	19003803
cisplatin	Cisplatin	D002945	15663-27-1	GADD45A	1647	Homo sapiens	9606	PLK1 protein inhibits the reaction [Cisplatin results in increased expression of GADD45A mRNA]	decreases^reaction|increases^expression	20655883
cisplatin	Cisplatin	D002945	15663-27-1	GAL3	678663	Homo sapiens	9606	CAPN2 protein promotes the reaction [GCS-100 inhibits the reaction [GAL3 protein results in increased susceptibility to Cisplatin]]	decreases^reaction|increases^reaction|increases^response to substance	21368866
cisplatin	Cisplatin	D002945	15663-27-1	GAL3	678663	Homo sapiens	9606	GAL3 protein inhibits the reaction [Cisplatin results in increased activity of CAPN2 protein]	decreases^reaction|increases^activity	21368866
cisplatin	Cisplatin	D002945	15663-27-1	GAL3	678663	Homo sapiens	9606	GAL3 protein results in decreased susceptibility to Cisplatin	decreases^response to substance	21368866
cisplatin	Cisplatin	D002945	15663-27-1	GAL3	678663	Homo sapiens	9606	GCS-100 inhibits the reaction [GAL3 protein results in increased susceptibility to Cisplatin]	decreases^reaction|increases^response to substance	21368866
cisplatin	Cisplatin	D002945	15663-27-1	GALNT7	51809	Homo sapiens	9606	GALNT7 protein affects the susceptibility to Cisplatin	affects^response to substance	16217747
cisplatin	Cisplatin	D002945	15663-27-1	GAPDH	2597	Homo sapiens	9606	Cisplatin results in increased expression of GAPDH protein	increases^expression	21924258
cisplatin	Cisplatin	D002945	15663-27-1	GARS	2617	Homo sapiens	9606	GARS protein affects the susceptibility to Cisplatin	affects^response to substance	16217747
cisplatin	Cisplatin	D002945	15663-27-1	GAS1	2619	Homo sapiens	9606	GAS1 protein affects the susceptibility to Cisplatin	affects^response to substance	16217747
cisplatin	Cisplatin	D002945	15663-27-1	GAS7	8522	Homo sapiens	9606	GAS7 protein results in increased susceptibility to Cisplatin	increases^response to substance	20890993
cisplatin	Cisplatin	D002945	15663-27-1	GAS8	2622	Homo sapiens	9606	GAS8 results in increased susceptibility to Cisplatin	increases^response to substance	21755009
cisplatin	Cisplatin	D002945	15663-27-1	GC20	281186	Homo sapiens	9606	Cisplatin results in increased expression of GC20 mRNA	increases^expression	19561079
cisplatin	Cisplatin	D002945	15663-27-1	GCC1	79571	Homo sapiens	9606	Cisplatin results in increased expression of GCC1 mRNA	increases^expression	19561079
cisplatin	Cisplatin	D002945	15663-27-1	GCLC	2729	Homo sapiens	9606	Cisplatin promotes the reaction [MYC protein binds to GCLC promoter]	affects^binding|increases^reaction	17628013
cisplatin	Cisplatin	D002945	15663-27-1	GCLM	2730	Homo sapiens	9606	Cisplatin promotes the reaction [MYC protein binds to GCLM promoter]	affects^binding|increases^reaction	17628013
cisplatin	Cisplatin	D002945	15663-27-1	GCNT1	2650	Homo sapiens	9606	Cisplatin results in decreased expression of GCNT1 protein	decreases^expression	16803524
cisplatin	Cisplatin	D002945	15663-27-1	GCNT2	2651	Homo sapiens	9606	GCNT2 protein affects the susceptibility to Cisplatin	affects^response to substance	16217747
cisplatin	Cisplatin	D002945	15663-27-1	GDF15	9518	Homo sapiens	9606	Cisplatin inhibits the reaction [Piroxicam results in decreased expression of GDF15 mRNA]	decreases^expression|decreases^reaction	21858171
cisplatin	Cisplatin	D002945	15663-27-1	GDF15	9518	Homo sapiens	9606	Cisplatin results in increased expression of GDF15 mRNA	increases^expression	21532991
cisplatin	Cisplatin	D002945	15663-27-1	GDF15	9518	Homo sapiens	9606	Folic Acid affects the reaction [Cisplatin affects the expression of GDF15 mRNA]	affects^expression|affects^reaction	16898872
cisplatin	Cisplatin	D002945	15663-27-1	GFPT1	2673	Homo sapiens	9606	Cisplatin results in increased expression of GFPT1 mRNA	increases^expression	19561079
cisplatin	Cisplatin	D002945	15663-27-1	GFPT2	9945	Homo sapiens	9606	Cisplatin results in decreased expression of GFPT2 mRNA	decreases^expression	19561079
cisplatin	Cisplatin	D002945	15663-27-1	GINS1	9837	Homo sapiens	9606	Cisplatin promotes the reaction [Piroxicam results in decreased expression of GINS1 mRNA]	decreases^expression|increases^reaction	21858171
cisplatin	Cisplatin	D002945	15663-27-1	GINS2	51659	Homo sapiens	9606	Cisplatin affects the reaction [Piroxicam results in decreased expression of GINS2 mRNA]	affects^reaction|decreases^expression	21858171
cisplatin	Cisplatin	D002945	15663-27-1	GJE1	100126572	Homo sapiens	9606	[Cisplatin co-treated with panobinostat] affects the expression of GJE1 mRNA	affects^cotreatment|affects^expression	21791302
cisplatin	Cisplatin	D002945	15663-27-1	GLB1L	79411	Homo sapiens	9606	[Cisplatin co-treated with panobinostat] affects the expression of GLB1L mRNA	affects^cotreatment|affects^expression	21791302
cisplatin	Cisplatin	D002945	15663-27-1	GLI3	2737	Homo sapiens	9606	Cisplatin results in decreased expression of GLI3 mRNA	decreases^expression	19561079|21603599
cisplatin	Cisplatin	D002945	15663-27-1	GLRX2	51022	Homo sapiens	9606	GLRX2 protein affects the susceptibility to Cisplatin	affects^response to substance	16217747
cisplatin	Cisplatin	D002945	15663-27-1	GLS	2744	Homo sapiens	9606	Cisplatin results in increased expression of GLS mRNA	increases^expression	19561079
cisplatin	Cisplatin	D002945	15663-27-1	GM2A	2760	Homo sapiens	9606	[Piroxicam co-treated with Cisplatin] results in increased expression of GM2A mRNA	affects^cotreatment|increases^expression	21858171
cisplatin	Cisplatin	D002945	15663-27-1	GMDS	2762	Homo sapiens	9606	Cisplatin results in decreased expression of GMDS mRNA	decreases^expression	19561079
cisplatin	Cisplatin	D002945	15663-27-1	GMPPA	29926	Homo sapiens	9606	GMPPA protein results in decreased susceptibility to Cisplatin	decreases^response to substance	16734730
cisplatin	Cisplatin	D002945	15663-27-1	GNAS	2778	Homo sapiens	9606	Cisplatin inhibits the reaction [GNAS protein results in increased expression of XIAP mRNA]	decreases^reaction|increases^expression	21255191
cisplatin	Cisplatin	D002945	15663-27-1	GNAS	2778	Homo sapiens	9606	GNAS protein inhibits the reaction [Cisplatin results in increased cleavage of CASP3 protein]	decreases^reaction|increases^cleavage	21255191
cisplatin	Cisplatin	D002945	15663-27-1	GNAS	2778	Homo sapiens	9606	[GNAS protein results in increased expression of XIAP protein] which results in decreased susceptibility to Cisplatin	decreases^response to substance|increases^expression	21255191
cisplatin	Cisplatin	D002945	15663-27-1	GNAS	2778	Homo sapiens	9606	GNAS results in decreased susceptibility to Cisplatin	decreases^response to substance	21849418
cisplatin	Cisplatin	D002945	15663-27-1	GNB1L	54584	Homo sapiens	9606	Cisplatin results in decreased expression of GNB1L mRNA	decreases^expression	19561079
cisplatin	Cisplatin	D002945	15663-27-1	GNL3L	54552	Homo sapiens	9606	[Cisplatin co-treated with panobinostat] affects the expression of GNL3L mRNA	affects^cotreatment|affects^expression	21791302
cisplatin	Cisplatin	D002945	15663-27-1	GOLGA8A	23015	Homo sapiens	9606	GOLGA8A protein affects the susceptibility to Cisplatin	affects^response to substance	16217747
cisplatin	Cisplatin	D002945	15663-27-1	GOLGA8B	440270	Homo sapiens	9606	GOLGA8B protein affects the susceptibility to Cisplatin	affects^response to substance	16217747
cisplatin	Cisplatin	D002945	15663-27-1	GOT1	2805	Homo sapiens	9606	Cisplatin results in increased expression of GOT1 mRNA	increases^expression	19561079
cisplatin	Cisplatin	D002945	15663-27-1	GP1BB	2812	Homo sapiens	9606	Cisplatin results in increased expression of GP1BB mRNA	increases^expression	19561079
cisplatin	Cisplatin	D002945	15663-27-1	GPAA1	8733	Homo sapiens	9606	GPAA1 protein affects the susceptibility to Cisplatin	affects^response to substance	16217747
cisplatin	Cisplatin	D002945	15663-27-1	GPAA1	8733	Homo sapiens	9606	[Piroxicam co-treated with Cisplatin] results in increased expression of GPAA1 mRNA	affects^cotreatment|increases^expression	21858171
cisplatin	Cisplatin	D002945	15663-27-1	GPC1	2817	Homo sapiens	9606	[Piroxicam co-treated with Cisplatin] results in increased expression of GPC1 mRNA	affects^cotreatment|increases^expression	21858171
cisplatin	Cisplatin	D002945	15663-27-1	GPHN	10243	Homo sapiens	9606	Cisplatin results in decreased expression of GPHN mRNA	decreases^expression	19561079
cisplatin	Cisplatin	D002945	15663-27-1	GPR39	2863	Homo sapiens	9606	Cisplatin results in decreased expression of GPR39 mRNA	decreases^expression	21603599
cisplatin	Cisplatin	D002945	15663-27-1	GPX3	2878	Homo sapiens	9606	GPX3 promoter modified form results in decreased susceptibility to Cisplatin	decreases^response to substance	21684681
cisplatin	Cisplatin	D002945	15663-27-1	GPX3	2878	Homo sapiens	9606	GPX3 protein affects the susceptibility to Cisplatin	affects^response to substance	16217747
cisplatin	Cisplatin	D002945	15663-27-1	GRAMD4	23151	Homo sapiens	9606	Cisplatin promotes the reaction [[TP73 protein binds to GRAMD4 promoter] which results in increased expression of GRAMD4 mRNA]	affects^binding|increases^expression|increases^reaction	21127500
cisplatin	Cisplatin	D002945	15663-27-1	GRAMD4	23151	Homo sapiens	9606	TP73 protein promotes the reaction [Cisplatin results in increased expression of GRAMD4 mRNA]	increases^expression|increases^reaction	21127500
cisplatin	Cisplatin	D002945	15663-27-1	GRK5	2869	Homo sapiens	9606	Cisplatin results in decreased expression of GRK5 mRNA	decreases^expression	19561079
cisplatin	Cisplatin	D002945	15663-27-1	GRN	2896	Homo sapiens	9606	Cisplatin inhibits the reaction [Piroxicam results in decreased expression of GRN mRNA]	decreases^expression|decreases^reaction	21858171
cisplatin	Cisplatin	D002945	15663-27-1	GRPEL1	80273	Homo sapiens	9606	Cisplatin results in increased expression of GRPEL1 mRNA	increases^expression	19561079
cisplatin	Cisplatin	D002945	15663-27-1	GSK3A	2931	Homo sapiens	9606	Cisplatin results in decreased phosphorylation of GSK3A protein	decreases^phosphorylation	21821001
cisplatin	Cisplatin	D002945	15663-27-1	GSK3B	2932	Homo sapiens	9606	Cisplatin results in decreased phosphorylation of GSK3B protein	decreases^phosphorylation	21603599|21821001
cisplatin	Cisplatin	D002945	15663-27-1	GSK3B	2932	Homo sapiens	9606	GSK3B mutant form inhibits the reaction [Cisplatin results in increased expression of LGALS3 protein]	decreases^reaction|increases^expression	21821001
cisplatin	Cisplatin	D002945	15663-27-1	GSTA1	2938	Homo sapiens	9606	[Cisplatin co-treated with panobinostat] affects the expression of GSTA1 mRNA	affects^cotreatment|affects^expression	21791302
cisplatin	Cisplatin	D002945	15663-27-1	GSTA1	2938	Homo sapiens	9606	GSTA1 results in decreased susceptibility to Cisplatin	decreases^response to substance	21150160
cisplatin	Cisplatin	D002945	15663-27-1	GSTA2	2939	Homo sapiens	9606	[Cisplatin co-treated with panobinostat] affects the expression of GSTA2 mRNA	affects^cotreatment|affects^expression	21791302
cisplatin	Cisplatin	D002945	15663-27-1	GSTA5	221357	Homo sapiens	9606	[Cisplatin co-treated with panobinostat] affects the expression of GSTA5 mRNA	affects^cotreatment|affects^expression	21791302
cisplatin	Cisplatin	D002945	15663-27-1	GSTM1	2944	Homo sapiens	9606	GSTM1 gene affects the susceptibility to [Carmustine co-treated with Cyclophosphamide co-treated with Cisplatin]	affects^cotreatment|affects^response to substance	16087946
cisplatin	Cisplatin	D002945	15663-27-1	GSTM1	2944	Homo sapiens	9606	GSTM1 gene polymorphism affects the susceptibility to [Paclitaxel co-treated with Cisplatin]	affects^cotreatment|affects^response to substance	12851839
cisplatin	Cisplatin	D002945	15663-27-1	GSTM1	2944	Homo sapiens	9606	GSTM1 protein affects the susceptibility to Cisplatin	affects^response to substance	16217747
cisplatin	Cisplatin	D002945	15663-27-1	GSTM2	2946	Homo sapiens	9606	GSTM2 protein affects the susceptibility to Cisplatin	affects^response to substance	16217747
cisplatin	Cisplatin	D002945	15663-27-1	GSTM3	2947	Homo sapiens	9606	GSTM3 gene polymorphism affects the susceptibility to Cisplatin	affects^response to substance	11081456
cisplatin	Cisplatin	D002945	15663-27-1	GSTM3	2947	Homo sapiens	9606	GSTM3 protein affects the susceptibility to Cisplatin	affects^response to substance	16217747
cisplatin	Cisplatin	D002945	15663-27-1	GSTO1	9446	Homo sapiens	9606	GSTO1 protein affects the susceptibility to Cisplatin	affects^response to substance	16217747
cisplatin	Cisplatin	D002945	15663-27-1	GSTP1	2950	Homo sapiens	9606	[Cisplatin co-treated with Fluorouracil] results in decreased expression of GSTP1 mRNA	affects^cotreatment|decreases^expression	15737843
cisplatin	Cisplatin	D002945	15663-27-1	GSTP1	2950	Homo sapiens	9606	GSTP1 gene affects the susceptibility to Cisplatin	affects^response to substance	12360105
cisplatin	Cisplatin	D002945	15663-27-1	GSTP1	2950	Homo sapiens	9606	GSTP1 gene polymorphism affects the susceptibility to Cisplatin	affects^response to substance	16785472
cisplatin	Cisplatin	D002945	15663-27-1	GSTP1	2950	Homo sapiens	9606	GSTP1 gene polymorphism results in decreased susceptibility to [Fluorouracil co-treated with Cisplatin]	affects^cotreatment|decreases^response to substance	16622263
cisplatin	Cisplatin	D002945	15663-27-1	GSTP1	2950	Homo sapiens	9606	GSTP1 mRNA results in increased susceptibility to Cisplatin	increases^response to substance	15239142
cisplatin	Cisplatin	D002945	15663-27-1	GSTP1	2950	Homo sapiens	9606	GSTP1 protein results in decreased susceptibility to Cisplatin	decreases^response to substance	15279901|19396019
cisplatin	Cisplatin	D002945	15663-27-1	GSTP1	2950	Homo sapiens	9606	GSTP1 results in decreased susceptibility to Cisplatin	decreases^response to substance	14678959
cisplatin	Cisplatin	D002945	15663-27-1	GSTP1	2950	Homo sapiens	9606	[PRKCA protein results in increased phosphorylation of GSTP1 protein] which results in increased metabolism of Cisplatin	increases^metabolic processing|increases^phosphorylation	20654585
cisplatin	Cisplatin	D002945	15663-27-1	GSTP1	2950	Homo sapiens	9606	[[PRKCA protein results in increased phosphorylation of GSTP1 protein] which results in increased metabolism of Cisplatin] which results in decreased susceptibility to Cisplatin	decreases^response to substance|increases^metabolic processing|increases^phosphorylation	20654585
cisplatin	Cisplatin	D002945	15663-27-1	GSTT1	2952	Homo sapiens	9606	GSTT1 gene polymorphism affects the susceptibility to [Paclitaxel co-treated with Cisplatin]	affects^cotreatment|affects^response to substance	12851839
cisplatin	Cisplatin	D002945	15663-27-1	GUCY1B3	2983	Homo sapiens	9606	GUCY1B3 protein affects the susceptibility to Cisplatin	affects^response to substance	16217747
cisplatin	Cisplatin	D002945	15663-27-1	GUK1	2987	Homo sapiens	9606	Folic Acid affects the reaction [Cisplatin affects the expression of GUK1 mRNA]	affects^expression|affects^reaction	16898872
cisplatin	Cisplatin	D002945	15663-27-1	GULP1	51454	Homo sapiens	9606	[Piroxicam co-treated with Cisplatin] results in increased expression of GULP1 mRNA	affects^cotreatment|increases^expression	21858171
cisplatin	Cisplatin	D002945	15663-27-1	H2AFX	3014	Homo sapiens	9606	BMI1 inhibits the reaction [Cisplatin results in increased phosphorylation of H2AFX protein]	decreases^reaction|increases^phosphorylation	21445297
cisplatin	Cisplatin	D002945	15663-27-1	H2AFX	3014	Homo sapiens	9606	BRCA1 mutant form promotes the reaction [RRM2 mutant form promotes the reaction [TP53 mutant form promotes the reaction [Cisplatin results in increased phosphorylation of H2AFX protein]]]	increases^phosphorylation|increases^reaction	21875941
cisplatin	Cisplatin	D002945	15663-27-1	H2AFX	3014	Homo sapiens	9606	Cisplatin results in increased expression of H2AFX protein	increases^expression	21500194|22383522
cisplatin	Cisplatin	D002945	15663-27-1	H2AFX	3014	Homo sapiens	9606	Cisplatin results in increased phosphorylation of and results in increased ubiquitination of H2AFX protein	increases^phosphorylation|increases^ubiquitination	21750216
cisplatin	Cisplatin	D002945	15663-27-1	H2AFX	3014	Homo sapiens	9606	Cisplatin results in increased phosphorylation of H2AFX protein	increases^phosphorylation	20145152|21285353|21324906|21356574|21445297|21875941
cisplatin	Cisplatin	D002945	15663-27-1	H2AFX	3014	Homo sapiens	9606	ERCC1 mutant form inhibits the reaction [RRM2 mutant form promotes the reaction [TP53 mutant form promotes the reaction [Cisplatin results in increased phosphorylation of H2AFX protein]]]	decreases^reaction|increases^phosphorylation|increases^reaction	21875941
cisplatin	Cisplatin	D002945	15663-27-1	H2AFX	3014	Homo sapiens	9606	ERCC1 mutant form inhibits the reaction [TP53 mutant form promotes the reaction [Cisplatin results in increased phosphorylation of H2AFX protein]]	decreases^reaction|increases^phosphorylation|increases^reaction	21875941
cisplatin	Cisplatin	D002945	15663-27-1	H2AFX	3014	Homo sapiens	9606	ERCC5 mutant form inhibits the reaction [RRM2 mutant form promotes the reaction [TP53 mutant form promotes the reaction [Cisplatin results in increased phosphorylation of H2AFX protein]]]	decreases^reaction|increases^phosphorylation|increases^reaction	21875941
cisplatin	Cisplatin	D002945	15663-27-1	H2AFX	3014	Homo sapiens	9606	ERCC6 protein inhibits the reaction [Cisplatin results in increased phosphorylation of H2AFX protein]	decreases^reaction|increases^phosphorylation	21324906
cisplatin	Cisplatin	D002945	15663-27-1	H2AFX	3014	Homo sapiens	9606	H2AFX gene mutant form inhibits the reaction [MIR138-1 results in increased susceptibility to Cisplatin]	decreases^reaction|increases^response to substance	21693595
cisplatin	Cisplatin	D002945	15663-27-1	H2AFX	3014	Homo sapiens	9606	Lovastatin inhibits the reaction [Cisplatin results in increased phosphorylation of H2AFX protein]	decreases^reaction|increases^phosphorylation	21356574
cisplatin	Cisplatin	D002945	15663-27-1	H2AFX	3014	Homo sapiens	9606	[MIR138-1 results in decreased expression of H2AFX] which results in increased susceptibility to Cisplatin	decreases^expression|increases^response to substance	21693595
cisplatin	Cisplatin	D002945	15663-27-1	H2AFX	3014	Homo sapiens	9606	MIR630 mRNA inhibits the reaction [Cisplatin results in increased phosphorylation of H2AFX protein]	decreases^reaction|increases^phosphorylation	20145152
cisplatin	Cisplatin	D002945	15663-27-1	H2AFX	3014	Homo sapiens	9606	RRM2 mutant form promotes the reaction [TP53 mutant form promotes the reaction [Cisplatin results in increased phosphorylation of H2AFX protein]]	increases^phosphorylation|increases^reaction	21875941
cisplatin	Cisplatin	D002945	15663-27-1	H2AFX	3014	Homo sapiens	9606	TP53 mutant form promotes the reaction [Cisplatin results in increased phosphorylation of H2AFX protein]	increases^phosphorylation|increases^reaction	21875941
cisplatin	Cisplatin	D002945	15663-27-1	H2AFX	3014	Homo sapiens	9606	Triiodothyronine analog promotes the reaction [Cisplatin results in increased expression of H2AFX protein]	increases^expression|increases^reaction	22383522
cisplatin	Cisplatin	D002945	15663-27-1	H2AFX	3014	Homo sapiens	9606	XPA mutant form inhibits the reaction [RRM2 mutant form promotes the reaction [TP53 mutant form promotes the reaction [Cisplatin results in increased phosphorylation of H2AFX protein]]]	decreases^reaction|increases^phosphorylation|increases^reaction	21875941
cisplatin	Cisplatin	D002945	15663-27-1	HBA1	3039	Homo sapiens	9606	Cisplatin results in increased expression of HBA1 mRNA	increases^expression	21603599
cisplatin	Cisplatin	D002945	15663-27-1	HDAC1	3065	Homo sapiens	9606	Cisplatin inhibits the reaction [[HDAC1 protein co-treated with TP63 protein modified form] binds to BBC3 promoter]	affects^binding|affects^cotreatment|decreases^reaction	21527555
cisplatin	Cisplatin	D002945	15663-27-1	HDAC4	9759	Homo sapiens	9606	Cisplatin results in decreased expression of HDAC4 mRNA	decreases^expression	19561079
cisplatin	Cisplatin	D002945	15663-27-1	HDAC4	9759	Homo sapiens	9606	HDAC4 results in decreased susceptibility to Cisplatin	decreases^response to substance	21571862
cisplatin	Cisplatin	D002945	15663-27-1	HDAC4	9759	Homo sapiens	9606	[HDAC4 results in increased activity of STAT1] which results in decreased susceptibility to Cisplatin	decreases^response to substance|increases^activity	21571862
cisplatin	Cisplatin	D002945	15663-27-1	HDAC6	10013	Homo sapiens	9606	HDAC6 protein promotes the reaction [Cisplatin results in increased expression of SRSF2 protein]	increases^expression|increases^reaction	21157427
cisplatin	Cisplatin	D002945	15663-27-1	HER3	30289	Homo sapiens	9606	Cisplatin promotes the reaction [HER3 protein binds to EGFR protein]	affects^binding|increases^reaction	20726858
cisplatin	Cisplatin	D002945	15663-27-1	HER3	30289	Homo sapiens	9606	Cisplatin results in increased phosphorylation of HER3 protein	increases^phosphorylation	20726858
cisplatin	Cisplatin	D002945	15663-27-1	HERC5	51191	Homo sapiens	9606	Cisplatin affects the reaction [Piroxicam results in increased expression of HERC5 mRNA]	affects^reaction|increases^expression	21858171
cisplatin	Cisplatin	D002945	15663-27-1	HERPUD1	9709	Homo sapiens	9606	Cisplatin results in decreased expression of HERPUD1 mRNA	decreases^expression	19561079
cisplatin	Cisplatin	D002945	15663-27-1	HEXIM1	10614	Homo sapiens	9606	Cisplatin results in increased expression of HEXIM1 mRNA	increases^expression	19561079|21603599
cisplatin	Cisplatin	D002945	15663-27-1	HEY1	23462	Homo sapiens	9606	Cisplatin results in increased expression of HEY1 mRNA	increases^expression	19561079
cisplatin	Cisplatin	D002945	15663-27-1	HHEX	3087	Homo sapiens	9606	HHEX protein affects the susceptibility to Cisplatin	affects^response to substance	16217747
cisplatin	Cisplatin	D002945	15663-27-1	HIF1A	3091	Homo sapiens	9606	ABCB1 affects the reaction [HIF1A affects the susceptibility to Cisplatin]	affects^reaction|affects^response to substance	21964646
cisplatin	Cisplatin	D002945	15663-27-1	HIF1A	3091	Homo sapiens	9606	ABCC1 affects the reaction [HIF1A affects the susceptibility to Cisplatin]	affects^reaction|affects^response to substance	21964646
cisplatin	Cisplatin	D002945	15663-27-1	HIF1A	3091	Homo sapiens	9606	Acetylcysteine inhibits the reaction [Cisplatin affects the localization of HIF1A protein]	affects^localization|decreases^reaction	17066447
cisplatin	Cisplatin	D002945	15663-27-1	HIF1A	3091	Homo sapiens	9606	Cisplatin affects the localization of HIF1A protein	affects^localization	17066447|20935474
cisplatin	Cisplatin	D002945	15663-27-1	HIF1A	3091	Homo sapiens	9606	Cisplatin inhibits the reaction [cobaltous chloride results in increased activity of HIF1A protein]	decreases^reaction|increases^activity	11090055
cisplatin	Cisplatin	D002945	15663-27-1	HIF1A	3091	Homo sapiens	9606	Cisplatin inhibits the reaction [Oxygen deficiency results in increased activity of HIF1A protein]	decreases^reaction|increases^activity	11090055
cisplatin	Cisplatin	D002945	15663-27-1	HIF1A	3091	Homo sapiens	9606	Cisplatin promotes the reaction [HIF1A protein binds to VEGFA promoter]	affects^binding|increases^reaction	20935474
cisplatin	Cisplatin	D002945	15663-27-1	HIF1A	3091	Homo sapiens	9606	Cisplatin results in decreased activity of HIF1A protein	decreases^activity	17498666
cisplatin	Cisplatin	D002945	15663-27-1	HIF1A	3091	Homo sapiens	9606	Cisplatin results in decreased expression of HIF1A protein	decreases^expression	17498666
cisplatin	Cisplatin	D002945	15663-27-1	HIF1A	3091	Homo sapiens	9606	Cisplatin results in decreased susceptibility to HIF1A protein	decreases^response to substance	17066447
cisplatin	Cisplatin	D002945	15663-27-1	HIF1A	3091	Homo sapiens	9606	Cisplatin results in increased degradation of HIF1A protein	increases^degradation	17498666
cisplatin	Cisplatin	D002945	15663-27-1	HIF1A	3091	Homo sapiens	9606	Cisplatin results in increased expression of HIF1A protein	increases^expression	21674241
cisplatin	Cisplatin	D002945	15663-27-1	HIF1A	3091	Homo sapiens	9606	Cyclosporine inhibits the reaction [HIF1A protein results in decreased uptake of Cisplatin]	decreases^reaction|decreases^uptake	17066447
cisplatin	Cisplatin	D002945	15663-27-1	HIF1A	3091	Homo sapiens	9606	HIF1A affects the susceptibility to Cisplatin	affects^response to substance	21964646
cisplatin	Cisplatin	D002945	15663-27-1	HIF1A	3091	Homo sapiens	9606	HIF1A protein affects the susceptibility to Cisplatin	affects^response to substance	16532342
cisplatin	Cisplatin	D002945	15663-27-1	HIF1A	3091	Homo sapiens	9606	HIF1A protein results in decreased uptake of Cisplatin	decreases^uptake	17066447
cisplatin	Cisplatin	D002945	15663-27-1	HIF1A	3091	Homo sapiens	9606	Topotecan inhibits the reaction [Cisplatin affects the localization of HIF1A protein]	affects^localization|decreases^reaction	20935474
cisplatin	Cisplatin	D002945	15663-27-1	HIF1A	3091	Homo sapiens	9606	Topotecan inhibits the reaction [Cisplatin promotes the reaction [HIF1A protein binds to VEGFA promoter]]	affects^binding|decreases^reaction|increases^reaction	20935474
cisplatin	Cisplatin	D002945	15663-27-1	HIF1A	3091	Homo sapiens	9606	TP53 protein affects the reaction [Cisplatin results in increased degradation of HIF1A protein]	affects^reaction|increases^degradation	17498666
cisplatin	Cisplatin	D002945	15663-27-1	HIST1H4C	8364	Homo sapiens	9606	Cisplatin inhibits the reaction [Piroxicam results in decreased expression of HIST1H4C mRNA]	decreases^expression|decreases^reaction	21858171
cisplatin	Cisplatin	D002945	15663-27-1	HJURP	55355	Homo sapiens	9606	Cisplatin results in decreased expression of HJURP mRNA	decreases^expression	19561079
cisplatin	Cisplatin	D002945	15663-27-1	HLA-A	3105	Homo sapiens	9606	HLA-A protein affects the susceptibility to Cisplatin	affects^response to substance	16217747
cisplatin	Cisplatin	D002945	15663-27-1	HLA-A	3105	Homo sapiens	9606	[Piroxicam co-treated with Cisplatin] results in increased expression of HLA-A mRNA	affects^cotreatment|increases^expression	21858171
cisplatin	Cisplatin	D002945	15663-27-1	HLA-C	3107	Homo sapiens	9606	[Piroxicam co-treated with Cisplatin] results in increased expression of HLA-C mRNA	affects^cotreatment|increases^expression	21858171
cisplatin	Cisplatin	D002945	15663-27-1	HLA-DMA	3108	Homo sapiens	9606	[Cisplatin co-treated with panobinostat] affects the expression of HLA-DMA mRNA	affects^cotreatment|affects^expression	21791302
cisplatin	Cisplatin	D002945	15663-27-1	HLA-DMB	3109	Homo sapiens	9606	[Cisplatin co-treated with panobinostat] affects the expression of HLA-DMB mRNA	affects^cotreatment|affects^expression	21791302
cisplatin	Cisplatin	D002945	15663-27-1	HLA-DPA1	3113	Homo sapiens	9606	[Cisplatin co-treated with panobinostat] affects the expression of HLA-DPA1 mRNA	affects^cotreatment|affects^expression	21791302
cisplatin	Cisplatin	D002945	15663-27-1	HLA-DPA3	267013	Homo sapiens	9606	HLA-DPA3 protein affects the susceptibility to Cisplatin	affects^response to substance	16217747
cisplatin	Cisplatin	D002945	15663-27-1	HLA-DRB5	3127	Homo sapiens	9606	[Cisplatin co-treated with panobinostat] affects the expression of HLA-DRB5 mRNA	affects^cotreatment|affects^expression	21791302
cisplatin	Cisplatin	D002945	15663-27-1	HLA-G	3135	Homo sapiens	9606	HLA-G protein affects the susceptibility to Cisplatin	affects^response to substance	16217747
cisplatin	Cisplatin	D002945	15663-27-1	HLA-G	3135	Homo sapiens	9606	[Piroxicam co-treated with Cisplatin] results in increased expression of HLA-G mRNA	affects^cotreatment|increases^expression	21858171
cisplatin	Cisplatin	D002945	15663-27-1	HMGA2	8091	Homo sapiens	9606	Cisplatin results in decreased expression of HMGA2 mRNA	decreases^expression	19561079
cisplatin	Cisplatin	D002945	15663-27-1	HMGA2	8091	Homo sapiens	9606	[Piroxicam co-treated with Cisplatin] results in increased expression of HMGA2 mRNA	affects^cotreatment|increases^expression	21858171
cisplatin	Cisplatin	D002945	15663-27-1	HMGN3	9324	Homo sapiens	9606	Cisplatin promotes the reaction [Piroxicam results in decreased expression of HMGN3 mRNA]	decreases^expression|increases^reaction	21858171
cisplatin	Cisplatin	D002945	15663-27-1	HMMR	3161	Homo sapiens	9606	[Piroxicam co-treated with Cisplatin] results in increased expression of HMMR mRNA	affects^cotreatment|increases^expression	21858171
cisplatin	Cisplatin	D002945	15663-27-1	HMOX1	3162	Homo sapiens	9606	Cisplatin results in increased expression of HMOX1 mRNA	increases^expression	19561079
cisplatin	Cisplatin	D002945	15663-27-1	HNRNPA1	3178	Homo sapiens	9606	Cisplatin results in increased expression of HNRNPA1 protein	increases^expression	16803524
cisplatin	Cisplatin	D002945	15663-27-1	HNRNPA3	220988	Homo sapiens	9606	Cisplatin inhibits the reaction [Piroxicam results in decreased expression of HNRNPA3 mRNA]	decreases^expression|decreases^reaction	21858171
cisplatin	Cisplatin	D002945	15663-27-1	HNRNPCL1	343069	Homo sapiens	9606	[Cisplatin co-treated with panobinostat] affects the expression of HNRNPCL1 mRNA	affects^cotreatment|affects^expression	21791302
cisplatin	Cisplatin	D002945	15663-27-1	HNRPD	79256	Homo sapiens	9606	Cisplatin affects the reaction [Piroxicam results in decreased expression of HNRPD mRNA]	affects^reaction|decreases^expression	21858171
cisplatin	Cisplatin	D002945	15663-27-1	HNRPL	394074	Homo sapiens	9606	[Piroxicam co-treated with Cisplatin] results in increased expression of HNRPL mRNA	affects^cotreatment|increases^expression	21858171
cisplatin	Cisplatin	D002945	15663-27-1	HOTAIR	100124700	Homo sapiens	9606	HOTAIR results in decreased susceptibility to Cisplatin	decreases^response to substance	21327457
cisplatin	Cisplatin	D002945	15663-27-1	HOXA9	3205	Homo sapiens	9606	Cisplatin results in increased expression of HOXA9 mRNA	increases^expression	19561079
cisplatin	Cisplatin	D002945	15663-27-1	HOXC13	3229	Homo sapiens	9606	Cisplatin results in increased expression of HOXC13 mRNA	increases^expression	19561079
cisplatin	Cisplatin	D002945	15663-27-1	HPCAL1	3241	Homo sapiens	9606	Cisplatin results in decreased expression of HPCAL1 mRNA	decreases^expression	19561079
cisplatin	Cisplatin	D002945	15663-27-1	HPCAL1	3241	Homo sapiens	9606	HPCAL1 protein affects the susceptibility to Cisplatin	affects^response to substance	16217747
cisplatin	Cisplatin	D002945	15663-27-1	HRAS	3265	Homo sapiens	9606	HRAS results in decreased susceptibility to Cisplatin	decreases^response to substance	21849418
cisplatin	Cisplatin	D002945	15663-27-1	HS2ST1	9653	Homo sapiens	9606	Cisplatin affects the reaction [Piroxicam results in decreased expression of HS2ST1 mRNA]	affects^reaction|decreases^expression	21858171
cisplatin	Cisplatin	D002945	15663-27-1	HS3ST3A1	9955	Homo sapiens	9606	Cisplatin results in decreased expression of HS3ST3A1 mRNA	decreases^expression	19561079
cisplatin	Cisplatin	D002945	15663-27-1	HS6ST3	266722	Homo sapiens	9606	Cisplatin results in decreased expression of HS6ST3 mRNA	decreases^expression	21603599
cisplatin	Cisplatin	D002945	15663-27-1	HSD17B11	51170	Homo sapiens	9606	[Piroxicam co-treated with Cisplatin] results in increased expression of HSD17B11 mRNA	affects^cotreatment|increases^expression	21858171
cisplatin	Cisplatin	D002945	15663-27-1	HSD17B8	7923	Homo sapiens	9606	HSD17B8 protein affects the susceptibility to Cisplatin	affects^response to substance	16217747
cisplatin	Cisplatin	D002945	15663-27-1	HSPA14	51182	Homo sapiens	9606	Cisplatin inhibits the reaction [Piroxicam results in increased expression of HSPA14 mRNA]	decreases^reaction|increases^expression	21858171
cisplatin	Cisplatin	D002945	15663-27-1	HSPA1A	3303	Homo sapiens	9606	Cisplatin affects the reaction [Piroxicam results in decreased expression of HSPA1A mRNA]	affects^reaction|decreases^expression	21858171
cisplatin	Cisplatin	D002945	15663-27-1	HSPA1A	3303	Homo sapiens	9606	Cisplatin results in increased expression of HSPA1A mRNA	increases^expression	19561079
cisplatin	Cisplatin	D002945	15663-27-1	HSPA1B	3304	Homo sapiens	9606	Cisplatin promotes the reaction [Piroxicam results in decreased expression of HSPA1B mRNA]	decreases^expression|increases^reaction	21858171
cisplatin	Cisplatin	D002945	15663-27-1	HSPA1B	3304	Homo sapiens	9606	Cisplatin results in increased expression of HSPA1B mRNA	increases^expression	19561079
cisplatin	Cisplatin	D002945	15663-27-1	HSPA4L	22824	Homo sapiens	9606	[Piroxicam co-treated with Cisplatin] results in increased expression of HSPA4L mRNA	affects^cotreatment|increases^expression	21858171
cisplatin	Cisplatin	D002945	15663-27-1	HSPA5	3309	Homo sapiens	9606	Cisplatin results in decreased expression of HSPA5 mRNA	decreases^expression	11099651
cisplatin	Cisplatin	D002945	15663-27-1	HSPA5	3309	Homo sapiens	9606	Cisplatin results in increased expression of HSPA5 mRNA	increases^expression	19561079
cisplatin	Cisplatin	D002945	15663-27-1	HSPA5	3309	Homo sapiens	9606	Cisplatin results in increased expression of HSPA5 protein	increases^expression	16357177
cisplatin	Cisplatin	D002945	15663-27-1	HSPA6	3310	Homo sapiens	9606	Cisplatin results in increased expression of HSPA6 mRNA	increases^expression	19561079|21603599
cisplatin	Cisplatin	D002945	15663-27-1	HSPA8	3312	Homo sapiens	9606	Cisplatin results in increased expression of HSPA8 protein	increases^expression	21924258
cisplatin	Cisplatin	D002945	15663-27-1	HSPA9	3313	Homo sapiens	9606	HSPA9 protein results in decreased susceptibility to Cisplatin	decreases^response to substance	21496427
cisplatin	Cisplatin	D002945	15663-27-1	HSPB1	3315	Homo sapiens	9606	HSPB1 protein affects the susceptibility to [Cisplatin co-treated with Fluorouracil co-treated with Leucovorin]	affects^cotreatment|affects^response to substance	19088045
cisplatin	Cisplatin	D002945	15663-27-1	HSPE1	3336	Homo sapiens	9606	Cisplatin inhibits the reaction [Piroxicam results in increased expression of HSPE1 mRNA]	decreases^reaction|increases^expression	21858171
cisplatin	Cisplatin	D002945	15663-27-1	HSPE1	3336	Homo sapiens	9606	HSPE1 protein results in decreased susceptibility to Cisplatin	decreases^response to substance	16394183
cisplatin	Cisplatin	D002945	15663-27-1	HTRA2	27429	Homo sapiens	9606	Cisplatin results in increased expression of HTRA2 protein	increases^expression	15863139
cisplatin	Cisplatin	D002945	15663-27-1	ICAM1	3383	Homo sapiens	9606	ICAM1 protein affects the susceptibility to Cisplatin	affects^response to substance	16217747
cisplatin	Cisplatin	D002945	15663-27-1	ID2	3398	Homo sapiens	9606	Cisplatin results in increased expression of ID2 mRNA	increases^expression	19561079|21603599
cisplatin	Cisplatin	D002945	15663-27-1	ID4	3400	Homo sapiens	9606	ID4 protein affects the susceptibility to Cisplatin	affects^response to substance	16217747
cisplatin	Cisplatin	D002945	15663-27-1	IER3	8870	Homo sapiens	9606	Cisplatin results in increased expression of IER3 mRNA	increases^expression	21532991
cisplatin	Cisplatin	D002945	15663-27-1	IER3	8870	Homo sapiens	9606	Tretinoin inhibits the reaction [Cisplatin results in increased expression of IER3 mRNA]	decreases^reaction|increases^expression	21532991
cisplatin	Cisplatin	D002945	15663-27-1	IER5	51278	Homo sapiens	9606	Cisplatin results in increased expression of IER5 mRNA	increases^expression	21532991
cisplatin	Cisplatin	D002945	15663-27-1	IFI30	10437	Homo sapiens	9606	IFI30 protein affects the susceptibility to Cisplatin	affects^response to substance	16217747
cisplatin	Cisplatin	D002945	15663-27-1	IFITM1	8519	Homo sapiens	9606	Folic Acid affects the reaction [Cisplatin affects the expression of IFITM1 mRNA]	affects^expression|affects^reaction	16898872
cisplatin	Cisplatin	D002945	15663-27-1	IFITM1	8519	Homo sapiens	9606	IFITM1 protein affects the susceptibility to Cisplatin	affects^response to substance	16217747|18202764
cisplatin	Cisplatin	D002945	15663-27-1	IFNAR2	3455	Homo sapiens	9606	[Cisplatin co-treated with panobinostat] affects the expression of IFNAR2 mRNA	affects^cotreatment|affects^expression	21791302
cisplatin	Cisplatin	D002945	15663-27-1	IFNG	3458	Homo sapiens	9606	ADRM1 protein promotes the reaction [Cisplatin inhibits the reaction [IFNG protein results in increased expression of and results in increased activity of NOS2 protein]]	decreases^reaction|increases^activity|increases^expression|increases^reaction	20959455
cisplatin	Cisplatin	D002945	15663-27-1	IFNG	3458	Homo sapiens	9606	Cisplatin inhibits the reaction [IFNG protein results in increased expression of and results in increased activity of NOS2 protein]	decreases^reaction|increases^activity|increases^expression	20959455
cisplatin	Cisplatin	D002945	15663-27-1	IFNG	3458	Homo sapiens	9606	[IFNG protein results in increased phosphorylation of STAT1 protein] which results in decreased susceptibility to Cisplatin	decreases^response to substance|increases^phosphorylation	20814891
cisplatin	Cisplatin	D002945	15663-27-1	IFNG	3458	Homo sapiens	9606	TP63 protein promotes the reaction [Cisplatin inhibits the reaction [IFNG protein results in increased expression of and results in increased activity of NOS2 protein]]	decreases^reaction|increases^activity|increases^expression|increases^reaction	20959455
cisplatin	Cisplatin	D002945	15663-27-1	IGF1R	3480	Homo sapiens	9606	IGF1R protein results in decreased susceptibility to Cisplatin	decreases^response to substance	21442237
cisplatin	Cisplatin	D002945	15663-27-1	IGF2BP2	10644	Homo sapiens	9606	Cisplatin results in decreased expression of IGF2BP2 mRNA	decreases^expression	19561079
cisplatin	Cisplatin	D002945	15663-27-1	IGFBP3	3486	Homo sapiens	9606	Cisplatin results in decreased expression of IGFBP3 mRNA	decreases^expression	16061661
cisplatin	Cisplatin	D002945	15663-27-1	IGFBP3	3486	Homo sapiens	9606	Cisplatin results in increased expression of IGFBP3 mRNA	increases^expression	21532991
cisplatin	Cisplatin	D002945	15663-27-1	IGFBP5	3488	Homo sapiens	9606	IGFBP5 protein affects the susceptibility to Cisplatin	affects^response to substance	16217747
cisplatin	Cisplatin	D002945	15663-27-1	IGFBP6	3489	Homo sapiens	9606	Cisplatin results in increased expression of IGFBP6 mRNA	increases^expression	21278888
cisplatin	Cisplatin	D002945	15663-27-1	IKBKB	3551	Homo sapiens	9606	IKBKB protein affects the susceptibility to Cisplatin	affects^response to substance	21720550
cisplatin	Cisplatin	D002945	15663-27-1	IL11	3589	Homo sapiens	9606	Cisplatin results in increased expression of IL11 mRNA	increases^expression	19561079
cisplatin	Cisplatin	D002945	15663-27-1	IL12A	3592	Homo sapiens	9606	Cisplatin results in increased expression of IL12A mRNA	increases^expression	19561079
cisplatin	Cisplatin	D002945	15663-27-1	IL13RA1	3597	Homo sapiens	9606	IL13RA1 protein results in decreased susceptibility to Cisplatin	decreases^response to substance	16734730
cisplatin	Cisplatin	D002945	15663-27-1	IL18	3606	Homo sapiens	9606	Cisplatin results in decreased expression of IL18	decreases^expression	17021654
cisplatin	Cisplatin	D002945	15663-27-1	IL1B	3553	Homo sapiens	9606	IL1B promoter polymorphism affects the susceptibility to [Fluorouracil co-treated with Cisplatin]	affects^cotreatment|affects^response to substance	16820919
cisplatin	Cisplatin	D002945	15663-27-1	IL1R1	3554	Homo sapiens	9606	IL1R1 protein affects the susceptibility to Cisplatin	affects^response to substance	16217747
cisplatin	Cisplatin	D002945	15663-27-1	IL33	90865	Homo sapiens	9606	CD4 mutant form inhibits the reaction [[Cisplatin co-treated with IL33] results in increased expression of CXCL1]	affects^cotreatment|decreases^reaction|increases^expression	21949094
cisplatin	Cisplatin	D002945	15663-27-1	IL33	90865	Homo sapiens	9606	[Cisplatin co-treated with IL33] results in increased expression of CXCL1	affects^cotreatment|increases^expression	21949094
cisplatin	Cisplatin	D002945	15663-27-1	IL3RA	3563	Homo sapiens	9606	[Cisplatin co-treated with panobinostat] affects the expression of IL3RA mRNA	affects^cotreatment|affects^expression	21791302
cisplatin	Cisplatin	D002945	15663-27-1	IL4	3565	Homo sapiens	9606	Cisplatin inhibits the reaction [[TNF co-treated with IL4] results in increased expression of PDCD1LG2]	affects^cotreatment|decreases^reaction|increases^expression	21765211
cisplatin	Cisplatin	D002945	15663-27-1	IL4R	3566	Homo sapiens	9606	Cisplatin promotes the reaction [[TP73 protein binds to IL4R intron] which results in increased expression of IL4R mRNA]	affects^binding|increases^expression|increases^reaction	14678968
cisplatin	Cisplatin	D002945	15663-27-1	IL4R	3566	Homo sapiens	9606	Cisplatin results in increased expression of IL4R mRNA	increases^expression	14678968
cisplatin	Cisplatin	D002945	15663-27-1	IL6	3569	Homo sapiens	9606	IL6 promoter polymorphism affects the susceptibility to [Fluorouracil co-treated with Cisplatin]	affects^cotreatment|affects^response to substance	16820919
cisplatin	Cisplatin	D002945	15663-27-1	IL6	3569	Homo sapiens	9606	IL6 protein results in decreased susceptibility to Cisplatin	decreases^response to substance	21273582
cisplatin	Cisplatin	D002945	15663-27-1	IL8	3576	Homo sapiens	9606	Cisplatin results in decreased expression of IL8 mRNA	decreases^expression	19561079
cisplatin	Cisplatin	D002945	15663-27-1	IL8	3576	Homo sapiens	9606	IL8 inhibits the reaction [Cisplatin results in increased activity of CASP3 protein]	decreases^reaction|increases^activity	21742513
cisplatin	Cisplatin	D002945	15663-27-1	IL8	3576	Homo sapiens	9606	IL8 results in decreased susceptibility to Cisplatin	decreases^response to substance	21742513
cisplatin	Cisplatin	D002945	15663-27-1	IL8	3576	Homo sapiens	9606	[IL8 results in increased expression of ABCB1 mRNA] which results in decreased susceptibility to Cisplatin	decreases^response to substance|increases^expression	21742513
cisplatin	Cisplatin	D002945	15663-27-1	IL8	3576	Homo sapiens	9606	[IL8 results in increased expression of ABCB1 protein] which results in decreased susceptibility to Cisplatin	decreases^response to substance|increases^expression	21742513
cisplatin	Cisplatin	D002945	15663-27-1	IL8	3576	Homo sapiens	9606	[IL8 results in increased expression of BCL2L1 mRNA] which results in decreased susceptibility to Cisplatin	decreases^response to substance|increases^expression	21742513
cisplatin	Cisplatin	D002945	15663-27-1	IL8	3576	Homo sapiens	9606	[IL8 results in increased expression of BCL2L1 protein] which results in decreased susceptibility to Cisplatin	decreases^response to substance|increases^expression	21742513
cisplatin	Cisplatin	D002945	15663-27-1	IL8	3576	Homo sapiens	9606	[IL8 results in increased expression of BCL2 mRNA] which results in decreased susceptibility to Cisplatin	decreases^response to substance|increases^expression	21742513
cisplatin	Cisplatin	D002945	15663-27-1	IL8	3576	Homo sapiens	9606	[IL8 results in increased expression of BCL2 protein] which results in decreased susceptibility to Cisplatin	decreases^response to substance|increases^expression	21742513
cisplatin	Cisplatin	D002945	15663-27-1	IL8	3576	Homo sapiens	9606	[IL8 results in increased expression of XIAP mRNA] which results in decreased susceptibility to Cisplatin	decreases^response to substance|increases^expression	21742513
cisplatin	Cisplatin	D002945	15663-27-1	IL8	3576	Homo sapiens	9606	[IL8 results in increased expression of XIAP protein] which results in decreased susceptibility to Cisplatin	decreases^response to substance|increases^expression	21742513
cisplatin	Cisplatin	D002945	15663-27-1	IL8	3576	Homo sapiens	9606	PD 98059 inhibits the reaction [IL8 results in decreased susceptibility to Cisplatin]	decreases^reaction|decreases^response to substance	21742513
cisplatin	Cisplatin	D002945	15663-27-1	IL8	3576	Homo sapiens	9606	wortmannin inhibits the reaction [IL8 results in decreased susceptibility to Cisplatin]	decreases^reaction|decreases^response to substance	21742513
cisplatin	Cisplatin	D002945	15663-27-1	ING4	51147	Homo sapiens	9606	ING4 protein promotes the reaction [Cisplatin results in decreased expression of BCL2L1 protein]	decreases^expression|increases^reaction	21052098
cisplatin	Cisplatin	D002945	15663-27-1	ING4	51147	Homo sapiens	9606	ING4 protein promotes the reaction [Cisplatin results in decreased expression of BCL2 protein]	decreases^expression|increases^reaction	21052098
cisplatin	Cisplatin	D002945	15663-27-1	ING4	51147	Homo sapiens	9606	ING4 protein promotes the reaction [Cisplatin results in increased activity of CASP3 protein]	increases^activity|increases^reaction	21052098
cisplatin	Cisplatin	D002945	15663-27-1	ING4	51147	Homo sapiens	9606	ING4 protein promotes the reaction [Cisplatin results in increased activity of CASP8 protein]	increases^activity|increases^reaction	21052098
cisplatin	Cisplatin	D002945	15663-27-1	ING4	51147	Homo sapiens	9606	ING4 protein promotes the reaction [Cisplatin results in increased activity of CASP9 protein]	increases^activity|increases^reaction	21052098
cisplatin	Cisplatin	D002945	15663-27-1	ING4	51147	Homo sapiens	9606	ING4 protein promotes the reaction [Cisplatin results in increased expression of BAK protein]	increases^expression|increases^reaction	21052098
cisplatin	Cisplatin	D002945	15663-27-1	ING4	51147	Homo sapiens	9606	ING4 protein promotes the reaction [Cisplatin results in increased expression of BAX protein]	increases^expression|increases^reaction	21052098
cisplatin	Cisplatin	D002945	15663-27-1	ING4	51147	Homo sapiens	9606	ING4 protein promotes the reaction [Cisplatin results in increased expression of FAS protein]	increases^expression|increases^reaction	21052098
cisplatin	Cisplatin	D002945	15663-27-1	INPP5A	3632	Homo sapiens	9606	Cisplatin results in decreased expression of INPP5A mRNA	decreases^expression	19561079
cisplatin	Cisplatin	D002945	15663-27-1	INSIG1	3638	Homo sapiens	9606	Cisplatin affects the reaction [Piroxicam results in decreased expression of INSIG1 mRNA]	affects^reaction|decreases^expression	21858171
cisplatin	Cisplatin	D002945	15663-27-1	IPO7	10527	Homo sapiens	9606	Cisplatin affects the reaction [Piroxicam results in decreased expression of IPO7 mRNA]	affects^reaction|decreases^expression	21858171
cisplatin	Cisplatin	D002945	15663-27-1	IRS1	3667	Homo sapiens	9606	Cisplatin results in decreased expression of IRS1 mRNA	decreases^expression	19561079
cisplatin	Cisplatin	D002945	15663-27-1	IRS1	3667	Homo sapiens	9606	IRS1 results in decreased susceptibility to Cisplatin	decreases^response to substance	21849418
cisplatin	Cisplatin	D002945	15663-27-1	IRX2	153572	Homo sapiens	9606	Cisplatin results in increased expression of IRX2 mRNA	increases^expression	19561079
cisplatin	Cisplatin	D002945	15663-27-1	ISCU	23479	Homo sapiens	9606	Cisplatin results in increased expression of ISCU mRNA	increases^expression	19561079
cisplatin	Cisplatin	D002945	15663-27-1	ISG15	9636	Homo sapiens	9606	Cisplatin results in increased expression of ISG15 mRNA	increases^expression	19561079
cisplatin	Cisplatin	D002945	15663-27-1	ITGA9	3680	Homo sapiens	9606	Cisplatin results in increased expression of ITGA9 mRNA	increases^expression	12066199
cisplatin	Cisplatin	D002945	15663-27-1	ITGAE	3682	Homo sapiens	9606	ITGAE protein results in increased susceptibility to Cisplatin	increases^response to substance	16734730
cisplatin	Cisplatin	D002945	15663-27-1	ITGAV	3685	Homo sapiens	9606	ITGAV results in decreased susceptibility to Cisplatin	decreases^response to substance	21795690
cisplatin	Cisplatin	D002945	15663-27-1	ITGB1	3688	Homo sapiens	9606	ITGB1 protein affects the susceptibility to Cisplatin	affects^response to substance	21720550
cisplatin	Cisplatin	D002945	15663-27-1	ITGB1	3688	Homo sapiens	9606	[ITGB1 protein results in increased activity of EGFR protein] which results in decreased susceptibility to Cisplatin	decreases^response to substance|increases^activity	21478906
cisplatin	Cisplatin	D002945	15663-27-1	ITGB4	3691	Homo sapiens	9606	Cisplatin results in increased expression of ITGB4 mRNA	increases^expression	12066199
cisplatin	Cisplatin	D002945	15663-27-1	ITPA	3704	Homo sapiens	9606	ITPA protein affects the susceptibility to Cisplatin	affects^response to substance	16217747
cisplatin	Cisplatin	D002945	15663-27-1	JAG2	3714	Homo sapiens	9606	[Piroxicam co-treated with Cisplatin] results in decreased expression of JAG2 mRNA	affects^cotreatment|decreases^expression	21858171
cisplatin	Cisplatin	D002945	15663-27-1	JUN	3725	Homo sapiens	9606	4-(4-fluorophenyl)-2-(4-hydroxyphenyl)-5-(4-pyridyl)imidazole inhibits the reaction [Cisplatin results in increased phosphorylation of JUN protein]	decreases^reaction|increases^phosphorylation	12663670
cisplatin	Cisplatin	D002945	15663-27-1	JUN	3725	Homo sapiens	9606	anthra(1,9-cd)pyrazol-6(2H)-one inhibits the reaction [Cisplatin results in increased phosphorylation of JUN protein]	decreases^reaction|increases^phosphorylation	12663670
cisplatin	Cisplatin	D002945	15663-27-1	JUN	3725	Homo sapiens	9606	Cisplatin results in increased expression of JUN mRNA	increases^expression	11592233|17355264
cisplatin	Cisplatin	D002945	15663-27-1	JUN	3725	Homo sapiens	9606	Cisplatin results in increased expression of JUN protein	increases^expression	19383537
cisplatin	Cisplatin	D002945	15663-27-1	JUN	3725	Homo sapiens	9606	Cisplatin results in increased phosphorylation of JUN protein	increases^phosphorylation	12663670
cisplatin	Cisplatin	D002945	15663-27-1	JUN	3725	Homo sapiens	9606	Folic Acid affects the reaction [Cisplatin affects the expression of JUN mRNA]	affects^expression|affects^reaction	16898872
cisplatin	Cisplatin	D002945	15663-27-1	JUN	3725	Homo sapiens	9606	Nicotine inhibits the reaction [Cisplatin results in increased expression of JUN mRNA]	decreases^reaction|increases^expression	11592233
cisplatin	Cisplatin	D002945	15663-27-1	KAT5	10524	Homo sapiens	9606	Cisplatin results in decreased expression of KAT5 mRNA	decreases^expression	21157427
cisplatin	Cisplatin	D002945	15663-27-1	KAT5	10524	Homo sapiens	9606	Cisplatin results in decreased expression of KAT5 protein	decreases^expression	21157427
cisplatin	Cisplatin	D002945	15663-27-1	KCNA5	3741	Homo sapiens	9606	KCNA5 protein results in increased susceptibility to Cisplatin	increases^response to substance	17428690
cisplatin	Cisplatin	D002945	15663-27-1	KCNA7	3743	Homo sapiens	9606	[Cisplatin co-treated with panobinostat] affects the expression of KCNA7 mRNA	affects^cotreatment|affects^expression	21791302
cisplatin	Cisplatin	D002945	15663-27-1	KCNH2	3757	Homo sapiens	9606	Cisplatin results in increased expression of KCNH2	increases^expression	22020779
cisplatin	Cisplatin	D002945	15663-27-1	KCNH2	3757	Homo sapiens	9606	KCNH2 results in increased susceptibility to Cisplatin	increases^response to substance	22020779
cisplatin	Cisplatin	D002945	15663-27-1	KCNK1	3775	Homo sapiens	9606	KCNK1 protein affects the susceptibility to Cisplatin	affects^response to substance	16217747
cisplatin	Cisplatin	D002945	15663-27-1	KCNMA1	3778	Homo sapiens	9606	Cisplatin results in decreased expression of KCNMA1 mRNA	decreases^expression	19561079
cisplatin	Cisplatin	D002945	15663-27-1	KCNMA1	3778	Homo sapiens	9606	[Piroxicam co-treated with Cisplatin] results in increased expression of KCNMA1 mRNA	affects^cotreatment|increases^expression	21858171
cisplatin	Cisplatin	D002945	15663-27-1	KCNMB4	27345	Homo sapiens	9606	[Cisplatin co-treated with panobinostat] affects the expression of KCNMB4 mRNA	affects^cotreatment|affects^expression	21791302
cisplatin	Cisplatin	D002945	15663-27-1	KDM4B	23030	Homo sapiens	9606	Cisplatin results in decreased expression of KDM4B mRNA	decreases^expression	19561079
cisplatin	Cisplatin	D002945	15663-27-1	KHDRBS3	10656	Homo sapiens	9606	Cisplatin results in decreased expression of KHDRBS3 mRNA	decreases^expression	19561079
cisplatin	Cisplatin	D002945	15663-27-1	KIAA1199	57214	Homo sapiens	9606	Cisplatin results in decreased expression of KIAA1199 mRNA	decreases^expression	19561079
cisplatin	Cisplatin	D002945	15663-27-1	KIAA1324	57535	Homo sapiens	9606	Cisplatin results in increased expression of KIAA1324 mRNA	increases^expression	19561079
cisplatin	Cisplatin	D002945	15663-27-1	KIF11	3832	Homo sapiens	9606	Cisplatin affects the reaction [Piroxicam results in decreased expression of KIF11 mRNA]	affects^reaction|decreases^expression	21858171
cisplatin	Cisplatin	D002945	15663-27-1	KIF14	9928	Homo sapiens	9606	Cisplatin promotes the reaction [Piroxicam results in decreased expression of KIF14 mRNA]	decreases^expression|increases^reaction	21858171
cisplatin	Cisplatin	D002945	15663-27-1	KIF20A	10112	Homo sapiens	9606	Cisplatin inhibits the reaction [Piroxicam results in decreased expression of KIF20A mRNA]	decreases^expression|decreases^reaction	21858171
cisplatin	Cisplatin	D002945	15663-27-1	KIF4A	24137	Homo sapiens	9606	[Piroxicam co-treated with Cisplatin] results in increased expression of KIF4A mRNA	affects^cotreatment|increases^expression	21858171
cisplatin	Cisplatin	D002945	15663-27-1	KIF5C	3800	Homo sapiens	9606	[Cisplatin co-treated with panobinostat] affects the expression of KIF5C mRNA	affects^cotreatment|affects^expression	21791302
cisplatin	Cisplatin	D002945	15663-27-1	KISS1	3814	Homo sapiens	9606	KISS1 mRNA results in increased susceptibility to Cisplatin	increases^response to substance	21383688
cisplatin	Cisplatin	D002945	15663-27-1	KIT	3815	Homo sapiens	9606	[Cisplatin results in decreased susceptibility to Cisplatin] which results in increased expression of KIT protein	decreases^response to substance|increases^expression	21342274
cisplatin	Cisplatin	D002945	15663-27-1	KIT	3815	Homo sapiens	9606	Cisplatin results in increased expression of KIT protein	increases^expression	21618587
cisplatin	Cisplatin	D002945	15663-27-1	KLF2	10365	Homo sapiens	9606	KLF2 protein affects the susceptibility to Cisplatin	affects^response to substance	16217747
cisplatin	Cisplatin	D002945	15663-27-1	KLF4	9314	Homo sapiens	9606	Buthionine Sulfoximine inhibits the reaction [KLF4 results in decreased susceptibility to Cisplatin]	decreases^reaction|decreases^response to substance	21833590
cisplatin	Cisplatin	D002945	15663-27-1	KLF4	9314	Homo sapiens	9606	KLF4 results in decreased susceptibility to Cisplatin	decreases^response to substance	21833590
cisplatin	Cisplatin	D002945	15663-27-1	KLF4	9314	Homo sapiens	9606	[Piroxicam co-treated with Cisplatin] results in increased expression of KLF4 mRNA	affects^cotreatment|increases^expression	21858171
cisplatin	Cisplatin	D002945	15663-27-1	KLF6	1316	Homo sapiens	9606	Cisplatin results in decreased expression of KLF6 mRNA	decreases^expression	19561079
cisplatin	Cisplatin	D002945	15663-27-1	KLHL21	9903	Homo sapiens	9606	[Piroxicam co-treated with Cisplatin] results in decreased expression of KLHL21 mRNA	affects^cotreatment|decreases^expression	21858171
cisplatin	Cisplatin	D002945	15663-27-1	KLK1	3816	Homo sapiens	9606	KLK1 protein affects the susceptibility to Cisplatin	affects^response to substance	16217747
cisplatin	Cisplatin	D002945	15663-27-1	KLK10	5655	Homo sapiens	9606	[Cisplatin co-treated with panobinostat] affects the expression of KLK10 mRNA	affects^cotreatment|affects^expression	21791302
cisplatin	Cisplatin	D002945	15663-27-1	KLK10	5655	Homo sapiens	9606	KLK10 protein affects the susceptibility to Cisplatin	affects^response to substance	16217747
cisplatin	Cisplatin	D002945	15663-27-1	KLK11	11012	Homo sapiens	9606	KLK11 protein affects the susceptibility to Cisplatin	affects^response to substance	16217747
cisplatin	Cisplatin	D002945	15663-27-1	KLK12	43849	Homo sapiens	9606	KLK12 protein affects the susceptibility to Cisplatin	affects^response to substance	16217747
cisplatin	Cisplatin	D002945	15663-27-1	KLK15	55554	Homo sapiens	9606	KLK15 protein affects the susceptibility to Cisplatin	affects^response to substance	16217747
cisplatin	Cisplatin	D002945	15663-27-1	KLK2	3817	Homo sapiens	9606	KLK2 protein affects the susceptibility to Cisplatin	affects^response to substance	16217747
cisplatin	Cisplatin	D002945	15663-27-1	KLK3	354	Homo sapiens	9606	KLK3 protein affects the susceptibility to Cisplatin	affects^response to substance	16217747
cisplatin	Cisplatin	D002945	15663-27-1	KLK4	9622	Homo sapiens	9606	KLK4 protein affects the susceptibility to Cisplatin	affects^response to substance	16217747
cisplatin	Cisplatin	D002945	15663-27-1	KLK5	25818	Homo sapiens	9606	KLK5 protein affects the susceptibility to Cisplatin	affects^response to substance	16217747
cisplatin	Cisplatin	D002945	15663-27-1	KLK6	5653	Homo sapiens	9606	KLK6 protein affects the susceptibility to Cisplatin	affects^response to substance	16217747
cisplatin	Cisplatin	D002945	15663-27-1	KLK7	5650	Homo sapiens	9606	KLK7 protein affects the susceptibility to Cisplatin	affects^response to substance	16217747
cisplatin	Cisplatin	D002945	15663-27-1	KLK8	11202	Homo sapiens	9606	[Cisplatin co-treated with panobinostat] affects the expression of KLK8 mRNA	affects^cotreatment|affects^expression	21791302
cisplatin	Cisplatin	D002945	15663-27-1	KLK8	11202	Homo sapiens	9606	KLK8 protein affects the susceptibility to Cisplatin	affects^response to substance	16217747
cisplatin	Cisplatin	D002945	15663-27-1	KLK9	284366	Homo sapiens	9606	KLK9 protein affects the susceptibility to Cisplatin	affects^response to substance	16217747
cisplatin	Cisplatin	D002945	15663-27-1	KPNA2	3838	Homo sapiens	9606	Cisplatin affects the reaction [Piroxicam results in decreased expression of KPNA2 mRNA]	affects^reaction|decreases^expression	21858171
cisplatin	Cisplatin	D002945	15663-27-1	KPNB1	3837	Homo sapiens	9606	Cisplatin affects the reaction [Piroxicam results in decreased expression of KPNB1 mRNA]	affects^reaction|decreases^expression	21858171
cisplatin	Cisplatin	D002945	15663-27-1	KRT17	3872	Homo sapiens	9606	KRT17 protein affects the susceptibility to Cisplatin	affects^response to substance	16217747
cisplatin	Cisplatin	D002945	15663-27-1	KRT19	3880	Homo sapiens	9606	Cisplatin results in decreased expression of KRT19 mRNA	decreases^expression	16061661
cisplatin	Cisplatin	D002945	15663-27-1	KRT4	3851	Homo sapiens	9606	Cisplatin results in decreased expression of KRT4 mRNA	decreases^expression	16061661
cisplatin	Cisplatin	D002945	15663-27-1	L1CAM	3897	Homo sapiens	9606	L1CAM affects the susceptibility to Cisplatin	affects^response to substance	21097529
cisplatin	Cisplatin	D002945	15663-27-1	LAMB3	3914	Homo sapiens	9606	Cisplatin affects the expression of LAMB3 mRNA	affects^expression	20216102
cisplatin	Cisplatin	D002945	15663-27-1	LAMC1	3915	Homo sapiens	9606	Cisplatin inhibits the reaction [Piroxicam results in decreased expression of LAMC1 mRNA]	decreases^expression|decreases^reaction	21858171
cisplatin	Cisplatin	D002945	15663-27-1	LANCL1	10314	Homo sapiens	9606	LANCL1 protein affects the susceptibility to Cisplatin	affects^response to substance	16217747
cisplatin	Cisplatin	D002945	15663-27-1	LAPTM4B	55353	Homo sapiens	9606	LAPTM4B protein affects the susceptibility to Cisplatin	affects^response to substance	16217747
cisplatin	Cisplatin	D002945	15663-27-1	LASS6	241447	Homo sapiens	9606	Cisplatin results in decreased expression of LASS6 mRNA	decreases^expression	19561079
cisplatin	Cisplatin	D002945	15663-27-1	LBR	3930	Homo sapiens	9606	Cisplatin affects the reaction [Piroxicam results in increased expression of LBR mRNA]	affects^reaction|increases^expression	21858171
cisplatin	Cisplatin	D002945	15663-27-1	LDLR	3949	Homo sapiens	9606	Cisplatin inhibits the reaction [Piroxicam results in decreased expression of LDLR mRNA]	decreases^expression|decreases^reaction	21858171
cisplatin	Cisplatin	D002945	15663-27-1	LEPREL1	55214	Homo sapiens	9606	LEPREL1 protein affects the susceptibility to Cisplatin	affects^response to substance	16217747
cisplatin	Cisplatin	D002945	15663-27-1	LGALS3	3958	Homo sapiens	9606	4-benzyl-2-methyl-1,2,4-thiadiazolidine-3,5-dione inhibits the reaction [Cisplatin results in increased expression of LGALS3 protein]	decreases^reaction|increases^expression	21821001
cisplatin	Cisplatin	D002945	15663-27-1	LGALS3	3958	Homo sapiens	9606	Cisplatin results in increased expression of LGALS3 protein	increases^expression	21821001
cisplatin	Cisplatin	D002945	15663-27-1	LGALS3	3958	Homo sapiens	9606	GSK3B mutant form inhibits the reaction [Cisplatin results in increased expression of LGALS3 protein]	decreases^reaction|increases^expression	21821001
cisplatin	Cisplatin	D002945	15663-27-1	LGALS3	3958	Homo sapiens	9606	LGALS3 inhibits the reaction [Cisplatin results in increased degradation of BCL2L1 protein]	decreases^reaction|increases^degradation	21821001
cisplatin	Cisplatin	D002945	15663-27-1	LGALS3	3958	Homo sapiens	9606	LGALS3 inhibits the reaction [Cisplatin results in increased degradation of MCL1 protein]	decreases^reaction|increases^degradation	21821001
cisplatin	Cisplatin	D002945	15663-27-1	LGALS3	3958	Homo sapiens	9606	LGALS3 protein mutant form results in decreased susceptibility to Cisplatin	decreases^response to substance	21750908
cisplatin	Cisplatin	D002945	15663-27-1	LGALS3	3958	Homo sapiens	9606	LGALS3 results in decreased susceptibility to Cisplatin	decreases^response to substance	21821001
cisplatin	Cisplatin	D002945	15663-27-1	LGALS3BP	3959	Homo sapiens	9606	[Piroxicam co-treated with Cisplatin] results in decreased expression of LGALS3BP mRNA	affects^cotreatment|decreases^expression	21858171
cisplatin	Cisplatin	D002945	15663-27-1	LHB	3972	Homo sapiens	9606	LHB protein results in decreased susceptibility to Cisplatin	decreases^response to substance	21074309
cisplatin	Cisplatin	D002945	15663-27-1	LHFP	10186	Homo sapiens	9606	Cisplatin results in decreased expression of LHFP mRNA	decreases^expression	19561079
cisplatin	Cisplatin	D002945	15663-27-1	LIF	3976	Homo sapiens	9606	Cisplatin results in increased expression of LIF mRNA	increases^expression	21532991
cisplatin	Cisplatin	D002945	15663-27-1	LIMCH1	22998	Homo sapiens	9606	LIMCH1 protein affects the susceptibility to Cisplatin	affects^response to substance	16217747
cisplatin	Cisplatin	D002945	15663-27-1	LIMK1	3984	Homo sapiens	9606	Cisplatin results in decreased expression of LIMK1 mRNA	decreases^expression	19561079
cisplatin	Cisplatin	D002945	15663-27-1	LINCR	100195784	Homo sapiens	9606	[Cisplatin co-treated with panobinostat] affects the expression of LINCR mRNA	affects^cotreatment|affects^expression	21791302
cisplatin	Cisplatin	D002945	15663-27-1	LOH11CR2A	419937	Homo sapiens	9606	LOH11CR2A protein affects the susceptibility to Cisplatin	affects^response to substance	16217747
cisplatin	Cisplatin	D002945	15663-27-1	LPP	4026	Homo sapiens	9606	Cisplatin results in decreased expression of LPP mRNA	decreases^expression	19561079
cisplatin	Cisplatin	D002945	15663-27-1	LRBA	987	Homo sapiens	9606	[Piroxicam co-treated with Cisplatin] results in increased expression of LRBA mRNA	affects^cotreatment|increases^expression	21858171
cisplatin	Cisplatin	D002945	15663-27-1	LRDD	57913	Homo sapiens	9606	Cisplatin results in increased expression of LRDD mRNA	increases^expression	21532991
cisplatin	Cisplatin	D002945	15663-27-1	LRIG1	26018	Homo sapiens	9606	LRIG1 protein inhibits the reaction [Cisplatin results in increased phosphorylation of and affects the localization of EGFR protein]	affects^localization|decreases^reaction|increases^phosphorylation	21431282
cisplatin	Cisplatin	D002945	15663-27-1	LRIG1	26018	Homo sapiens	9606	LRIG1 protein results in increased susceptibility to Cisplatin	increases^response to substance	21431282
cisplatin	Cisplatin	D002945	15663-27-1	LRP1	4035	Homo sapiens	9606	Cisplatin results in increased expression of LRP1 mRNA	increases^expression	21165580
cisplatin	Cisplatin	D002945	15663-27-1	LRP1	4035	Homo sapiens	9606	tanshinone inhibits the reaction [Cisplatin results in increased expression of LRP1 mRNA]	decreases^reaction|increases^expression	21165580
cisplatin	Cisplatin	D002945	15663-27-1	LRRC67	420168	Homo sapiens	9606	LRRC67 results in increased susceptibility to Cisplatin	increases^response to substance	21755009
cisplatin	Cisplatin	D002945	15663-27-1	LRRTM2	26045	Homo sapiens	9606	Cisplatin results in increased expression of LRRTM2 mRNA	increases^expression	19561079
cisplatin	Cisplatin	D002945	15663-27-1	LTBP1	4052	Homo sapiens	9606	LTBP1 protein affects the susceptibility to Cisplatin	affects^response to substance	16217747
cisplatin	Cisplatin	D002945	15663-27-1	LTF	4057	Homo sapiens	9606	Cisplatin results in decreased expression of LTF mRNA	decreases^expression	11099651
cisplatin	Cisplatin	D002945	15663-27-1	LYN	4067	Homo sapiens	9606	Cisplatin results in decreased expression of LYN mRNA	decreases^expression	21603599
cisplatin	Cisplatin	D002945	15663-27-1	MACF1	23499	Homo sapiens	9606	MACF1 protein affects the susceptibility to Cisplatin	affects^response to substance	16217747
cisplatin	Cisplatin	D002945	15663-27-1	MAD1L1	8379	Homo sapiens	9606	Cisplatin results in decreased expression of MAD1L1 mRNA	decreases^expression	21532991
cisplatin	Cisplatin	D002945	15663-27-1	MAD2L2	10459	Homo sapiens	9606	Cisplatin results in decreased expression of MAD2L2 protein	decreases^expression	16803524
cisplatin	Cisplatin	D002945	15663-27-1	MAGEA12	4111	Homo sapiens	9606	[[MIR34A binds to MAGEA12 3' UTR] which results in decreased expression of MAGEA12 protein] which results in increased susceptibility to Cisplatin	affects^binding|decreases^expression|increases^response to substance	21177782
cisplatin	Cisplatin	D002945	15663-27-1	MAGEA3	4102	Homo sapiens	9606	[[MIR34A binds to MAGEA3 3' UTR] which results in decreased expression of MAGEA3 protein] which results in increased susceptibility to Cisplatin	affects^binding|decreases^expression|increases^response to substance	21177782
cisplatin	Cisplatin	D002945	15663-27-1	MAGEA6	4105	Homo sapiens	9606	[[MIR34A binds to MAGEA6 3' UTR] which results in decreased expression of MAGEA6 protein] which results in increased susceptibility to Cisplatin	affects^binding|decreases^expression|increases^response to substance	21177782
cisplatin	Cisplatin	D002945	15663-27-1	MAGED2	10916	Homo sapiens	9606	MAGED2 protein affects the susceptibility to Cisplatin	affects^response to substance	16217747
cisplatin	Cisplatin	D002945	15663-27-1	MAL	4118	Homo sapiens	9606	MAL protein affects the susceptibility to Cisplatin	affects^response to substance	16217747
cisplatin	Cisplatin	D002945	15663-27-1	MALAT1	378938	Homo sapiens	9606	Cisplatin results in increased expression of MALAT1 mRNA	increases^expression	21603599
cisplatin	Cisplatin	D002945	15663-27-1	MAML2	84441	Homo sapiens	9606	Cisplatin results in decreased expression of MAML2 mRNA	decreases^expression	21603599
cisplatin	Cisplatin	D002945	15663-27-1	MANF	7873	Homo sapiens	9606	Cisplatin inhibits the reaction [Piroxicam results in decreased expression of MANF mRNA]	decreases^expression|decreases^reaction	21858171
cisplatin	Cisplatin	D002945	15663-27-1	MANF	7873	Homo sapiens	9606	Cisplatin results in increased expression of MANF mRNA	increases^expression	19561079
cisplatin	Cisplatin	D002945	15663-27-1	MAP1LC3B	81631	Homo sapiens	9606	Cisplatin results in increased expression of MAP1LC3B mRNA	increases^expression	19561079
cisplatin	Cisplatin	D002945	15663-27-1	MAP1LC3B	81631	Homo sapiens	9606	[Cisplatin results in increased phosphorylation of TP63 protein alternative form] which results in increased expression of MAP1LC3B protein	increases^expression|increases^phosphorylation	21191146
cisplatin	Cisplatin	D002945	15663-27-1	MAP1LC3B	81631	Homo sapiens	9606	STK11 protein promotes the reaction [[Cisplatin results in increased phosphorylation of TP63 protein alternative form] which results in increased expression of MAP1LC3B protein]	increases^expression|increases^phosphorylation|increases^reaction	21191146
cisplatin	Cisplatin	D002945	15663-27-1	MAP2K1	5604	Homo sapiens	9606	Cisplatin results in increased phosphorylation of MAP2K1 protein	increases^phosphorylation	21444628
cisplatin	Cisplatin	D002945	15663-27-1	MAP2K1	5604	Homo sapiens	9606	MAP2K1 protein results in decreased susceptibility to [Cisplatin co-treated with Fluorouracil]	affects^cotreatment|decreases^response to substance	21444628
cisplatin	Cisplatin	D002945	15663-27-1	MAP2K1	5604	Homo sapiens	9606	[U 0126 results in decreased activity of MAP2K1 protein] results in increased susceptibility to [Fluorouracil co-treated with Cisplatin]	affects^cotreatment|decreases^activity|increases^response to substance	21444628
cisplatin	Cisplatin	D002945	15663-27-1	MAP2K2	5605	Homo sapiens	9606	Cisplatin results in increased phosphorylation of MAP2K2 protein	increases^phosphorylation	21444628
cisplatin	Cisplatin	D002945	15663-27-1	MAP2K2	5605	Homo sapiens	9606	MAP2K2 protein results in decreased susceptibility to [Cisplatin co-treated with Fluorouracil]	affects^cotreatment|decreases^response to substance	21444628
cisplatin	Cisplatin	D002945	15663-27-1	MAP2K2	5605	Homo sapiens	9606	MAP2K2 results in decreased susceptibility to Cisplatin	decreases^response to substance	21849418
cisplatin	Cisplatin	D002945	15663-27-1	MAP2K2	5605	Homo sapiens	9606	[U 0126 results in decreased activity of MAP2K2 protein] results in increased susceptibility to [Fluorouracil co-treated with Cisplatin]	affects^cotreatment|decreases^activity|increases^response to substance	21444628
cisplatin	Cisplatin	D002945	15663-27-1	MAP2K6	5608	Homo sapiens	9606	MAP2K6 protein affects the susceptibility to Cisplatin	affects^response to substance	16217747
cisplatin	Cisplatin	D002945	15663-27-1	MAP3K5	4217	Homo sapiens	9606	Cisplatin results in decreased expression of MAP3K5 mRNA	decreases^expression	19561079
cisplatin	Cisplatin	D002945	15663-27-1	MAP4K4	9448	Homo sapiens	9606	Cisplatin results in decreased expression of MAP4K4 mRNA	decreases^expression	19561079
cisplatin	Cisplatin	D002945	15663-27-1	MAPK1	5594	Homo sapiens	9606	4-(4-fluorophenyl)-2-(4-hydroxyphenyl)-5-(4-pyridyl)imidazole promotes the reaction [Cisplatin results in increased phosphorylation of and results in increased activity of MAPK1 protein]	increases^activity|increases^phosphorylation|increases^reaction	12663670
cisplatin	Cisplatin	D002945	15663-27-1	MAPK1	5594	Homo sapiens	9606	Cisplatin affects the activity of MAPK1 protein	affects^activity	21107699
cisplatin	Cisplatin	D002945	15663-27-1	MAPK1	5594	Homo sapiens	9606	[Cisplatin results in decreased susceptibility to Cisplatin] which results in decreased phosphorylation of MAPK1 protein	decreases^phosphorylation|decreases^response to substance	21130731
cisplatin	Cisplatin	D002945	15663-27-1	MAPK1	5594	Homo sapiens	9606	Cisplatin results in increased activity of MAPK1 protein	increases^activity	20106947
cisplatin	Cisplatin	D002945	15663-27-1	MAPK1	5594	Homo sapiens	9606	Cisplatin results in increased phosphorylation of and results in increased activity of MAPK1 protein	increases^activity|increases^phosphorylation	12663670|21618587|21996734
cisplatin	Cisplatin	D002945	15663-27-1	MAPK1	5594	Homo sapiens	9606	Cisplatin results in increased phosphorylation of MAPK1 protein	increases^phosphorylation	21444628|21742020
cisplatin	Cisplatin	D002945	15663-27-1	MAPK1	5594	Homo sapiens	9606	[Curcumin results in decreased activity of MAPK1 protein] which results in increased susceptibility to Cisplatin	decreases^activity|increases^response to substance	21493726
cisplatin	Cisplatin	D002945	15663-27-1	MAPK1	5594	Homo sapiens	9606	Fluorouracil inhibits the reaction [Cisplatin results in increased phosphorylation of MAPK1 protein]	decreases^reaction|increases^phosphorylation	21444628
cisplatin	Cisplatin	D002945	15663-27-1	MAPK1	5594	Homo sapiens	9606	Nicotine inhibits the reaction [Cisplatin results in increased activity of MAPK1 protein]	decreases^reaction|increases^activity	20106947
cisplatin	Cisplatin	D002945	15663-27-1	MAPK1	5594	Homo sapiens	9606	PD 0325901 inhibits the reaction [Cisplatin results in increased phosphorylation of and results in increased activity of MAPK1 protein]	decreases^reaction|increases^activity|increases^phosphorylation	21996734
cisplatin	Cisplatin	D002945	15663-27-1	MAPK1	5594	Homo sapiens	9606	PD 98059 inhibits the reaction [Cisplatin results in increased phosphorylation of and results in increased activity of MAPK1 protein]	decreases^reaction|increases^activity|increases^phosphorylation	12663670
cisplatin	Cisplatin	D002945	15663-27-1	MAPK1	5594	Homo sapiens	9606	[sorafenib co-treated with Cisplatin] results in decreased phosphorylation of MAPK1 protein	affects^cotreatment|decreases^phosphorylation	18819900
cisplatin	Cisplatin	D002945	15663-27-1	MAPK1	5594	Homo sapiens	9606	U 0126 inhibits the reaction [Cisplatin results in increased activity of MAPK1 protein]	decreases^reaction|increases^activity	20106947
cisplatin	Cisplatin	D002945	15663-27-1	MAPK1	5594	Homo sapiens	9606	U 0126 inhibits the reaction [Cisplatin results in increased phosphorylation of and results in increased activity of MAPK1 protein]	decreases^reaction|increases^activity|increases^phosphorylation	21618587
cisplatin	Cisplatin	D002945	15663-27-1	MAPK1	5594	Homo sapiens	9606	U 0126 inhibits the reaction [Cisplatin results in increased phosphorylation of MAPK1 protein]	decreases^reaction|increases^phosphorylation	21444628|21742020
cisplatin	Cisplatin	D002945	15663-27-1	MAPK12	6300	Homo sapiens	9606	Cisplatin results in increased expression of MAPK12 mRNA	increases^expression	21603599
cisplatin	Cisplatin	D002945	15663-27-1	MAPK3	5595	Homo sapiens	9606	4-(4-fluorophenyl)-2-(4-hydroxyphenyl)-5-(4-pyridyl)imidazole promotes the reaction [Cisplatin results in increased phosphorylation of and results in increased activity of MAPK3 protein]	increases^activity|increases^phosphorylation|increases^reaction	12663670
cisplatin	Cisplatin	D002945	15663-27-1	MAPK3	5595	Homo sapiens	9606	Cisplatin affects the activity of MAPK3 protein	affects^activity	21107699
cisplatin	Cisplatin	D002945	15663-27-1	MAPK3	5595	Homo sapiens	9606	[Cisplatin results in decreased susceptibility to Cisplatin] which results in decreased phosphorylation of MAPK3 protein	decreases^phosphorylation|decreases^response to substance	21130731
cisplatin	Cisplatin	D002945	15663-27-1	MAPK3	5595	Homo sapiens	9606	Cisplatin results in increased activity of MAPK3 protein	increases^activity	20106947
cisplatin	Cisplatin	D002945	15663-27-1	MAPK3	5595	Homo sapiens	9606	Cisplatin results in increased expression of MAPK3 protein	increases^expression	20309937
cisplatin	Cisplatin	D002945	15663-27-1	MAPK3	5595	Homo sapiens	9606	Cisplatin results in increased phosphorylation of and results in increased activity of MAPK3 protein	increases^activity|increases^phosphorylation	12663670|21618587|21996734
cisplatin	Cisplatin	D002945	15663-27-1	MAPK3	5595	Homo sapiens	9606	Cisplatin results in increased phosphorylation of MAPK3 protein	increases^phosphorylation	21444628|21603599|21742020
cisplatin	Cisplatin	D002945	15663-27-1	MAPK3	5595	Homo sapiens	9606	[Curcumin results in decreased activity of MAPK3 protein] which results in increased susceptibility to Cisplatin	decreases^activity|increases^response to substance	21493726
cisplatin	Cisplatin	D002945	15663-27-1	MAPK3	5595	Homo sapiens	9606	Fluorouracil inhibits the reaction [Cisplatin results in increased phosphorylation of MAPK3 protein]	decreases^reaction|increases^phosphorylation	21444628
cisplatin	Cisplatin	D002945	15663-27-1	MAPK3	5595	Homo sapiens	9606	Nicotine inhibits the reaction [Cisplatin results in increased activity of MAPK3 protein]	decreases^reaction|increases^activity	20106947
cisplatin	Cisplatin	D002945	15663-27-1	MAPK3	5595	Homo sapiens	9606	PD 0325901 inhibits the reaction [Cisplatin results in increased phosphorylation of and results in increased activity of MAPK3 protein]	decreases^reaction|increases^activity|increases^phosphorylation	21996734
cisplatin	Cisplatin	D002945	15663-27-1	MAPK3	5595	Homo sapiens	9606	PD 98059 inhibits the reaction [Cisplatin results in increased phosphorylation of and results in increased activity of MAPK3 protein]	decreases^reaction|increases^activity|increases^phosphorylation	12663670
cisplatin	Cisplatin	D002945	15663-27-1	MAPK3	5595	Homo sapiens	9606	[sorafenib co-treated with Cisplatin] results in decreased phosphorylation of MAPK3 protein	affects^cotreatment|decreases^phosphorylation	18819900
cisplatin	Cisplatin	D002945	15663-27-1	MAPK3	5595	Homo sapiens	9606	U 0126 inhibits the reaction [Cisplatin results in increased activity of MAPK3 protein]	decreases^reaction|increases^activity	20106947
cisplatin	Cisplatin	D002945	15663-27-1	MAPK3	5595	Homo sapiens	9606	U 0126 inhibits the reaction [Cisplatin results in increased phosphorylation of MAPK3 protein]	decreases^reaction|increases^phosphorylation	21444628|21742020
cisplatin	Cisplatin	D002945	15663-27-1	MAPK7	5598	Homo sapiens	9606	[BIX 02188 results in decreased activity of MAPK7] which results in increased susceptibility to Cisplatin	decreases^activity|increases^response to substance	22008504
cisplatin	Cisplatin	D002945	15663-27-1	MAPK7	5598	Homo sapiens	9606	MAPK7 results in decreased susceptibility to Cisplatin	decreases^response to substance	22008504
cisplatin	Cisplatin	D002945	15663-27-1	MAPK8	5599	Homo sapiens	9606	[Cisplatin co-treated with 2,5,7,8-tetramethyl-2R-(4R,8R,12-trimethyltridecyl)chroman-6-yloxy acetic acid] results in increased phosphorylation of MAPK8 protein	affects^cotreatment|increases^phosphorylation	21214929
cisplatin	Cisplatin	D002945	15663-27-1	MAPK8	5599	Homo sapiens	9606	Cisplatin results in increased phosphorylation of and results in increased activity of MAPK8 protein	increases^activity|increases^phosphorylation	11592233
cisplatin	Cisplatin	D002945	15663-27-1	MAPK8	5599	Homo sapiens	9606	Nicotine inhibits the reaction [Cisplatin results in increased phosphorylation of and results in increased activity of MAPK8 protein]	decreases^reaction|increases^activity|increases^phosphorylation	11592233
cisplatin	Cisplatin	D002945	15663-27-1	MAPK9	5601	Homo sapiens	9606	[Cisplatin co-treated with 2,5,7,8-tetramethyl-2R-(4R,8R,12-trimethyltridecyl)chroman-6-yloxy acetic acid] results in increased phosphorylation of MAPK9 protein	affects^cotreatment|increases^phosphorylation	21214929
cisplatin	Cisplatin	D002945	15663-27-1	MAPKAP1	79109	Homo sapiens	9606	Cisplatin results in decreased expression of MAPKAP1 mRNA	decreases^expression	19561079
cisplatin	Cisplatin	D002945	15663-27-1	MARS	4141	Homo sapiens	9606	Cisplatin inhibits the reaction [Piroxicam results in decreased expression of MARS mRNA]	decreases^expression|decreases^reaction	21858171
cisplatin	Cisplatin	D002945	15663-27-1	MAT1A	4143	Homo sapiens	9606	[Cisplatin co-treated with panobinostat] affects the expression of MAT1A mRNA	affects^cotreatment|affects^expression	21791302
cisplatin	Cisplatin	D002945	15663-27-1	MBD4	8930	Homo sapiens	9606	Cisplatin results in increased expression of MBD4 mRNA	increases^expression	19561079
cisplatin	Cisplatin	D002945	15663-27-1	MCL1	4170	Homo sapiens	9606	[Cisplatin results in decreased susceptibility to Cisplatin] which results in decreased expression of MCL1 protein	decreases^expression|decreases^response to substance	21130731
cisplatin	Cisplatin	D002945	15663-27-1	MCL1	4170	Homo sapiens	9606	Cisplatin results in increased degradation of MCL1 protein	increases^degradation	21821001
cisplatin	Cisplatin	D002945	15663-27-1	MCL1	4170	Homo sapiens	9606	LGALS3 inhibits the reaction [Cisplatin results in increased degradation of MCL1 protein]	decreases^reaction|increases^degradation	21821001
cisplatin	Cisplatin	D002945	15663-27-1	MCL1	4170	Homo sapiens	9606	MCL1 protein results in decreased susceptibility to Cisplatin	decreases^response to substance	20802529|21507240
cisplatin	Cisplatin	D002945	15663-27-1	MCM2	4171	Homo sapiens	9606	Cisplatin results in increased expression of MCM2 mRNA	increases^expression	16061661
cisplatin	Cisplatin	D002945	15663-27-1	MCM4	4173	Homo sapiens	9606	Cisplatin inhibits the reaction [Piroxicam results in decreased expression of MCM4 mRNA]	decreases^expression|decreases^reaction	21858171
cisplatin	Cisplatin	D002945	15663-27-1	MDM2	4193	Homo sapiens	9606	Cisplatin promotes the reaction [TP53 protein binds to MDM2 promoter]	affects^binding|increases^reaction	21552291
cisplatin	Cisplatin	D002945	15663-27-1	MDM2	4193	Homo sapiens	9606	Cisplatin promotes the reaction [TP53 protein results in increased expression of MDM2]	increases^expression|increases^reaction	21552291
cisplatin	Cisplatin	D002945	15663-27-1	MDM2	4193	Homo sapiens	9606	Cisplatin results in increased activity of and results in increased expression of MDM2 protein	increases^activity|increases^expression	21624110
cisplatin	Cisplatin	D002945	15663-27-1	MDM2	4193	Homo sapiens	9606	Cisplatin results in increased expression of MDM2 protein	increases^expression	16797627
cisplatin	Cisplatin	D002945	15663-27-1	MDM2	4193	Homo sapiens	9606	nutlin 3 promotes the reaction [Cisplatin results in increased activity of and results in increased expression of MDM2 protein]	increases^activity|increases^expression|increases^reaction	21624110
cisplatin	Cisplatin	D002945	15663-27-1	MDM2	4193	Homo sapiens	9606	TP53 affects the reaction [Cisplatin results in increased activity of and results in increased expression of MDM2 protein]	affects^reaction|increases^activity|increases^expression	21624110
cisplatin	Cisplatin	D002945	15663-27-1	MDM2	4193	Homo sapiens	9606	TP53 affects the reaction [nutlin 3 promotes the reaction [Cisplatin results in increased activity of and results in increased expression of MDM2 protein]]	affects^reaction|increases^activity|increases^expression|increases^reaction	21624110
cisplatin	Cisplatin	D002945	15663-27-1	MDM2	4193	Homo sapiens	9606	[TP53 protein binds to MDM2 protein] which results in decreased susceptibility to Cisplatin	affects^binding|decreases^response to substance	21509038
cisplatin	Cisplatin	D002945	15663-27-1	MED1	5469	Homo sapiens	9606	Cisplatin promotes the reaction [NR1I2 protein binds to MED1 protein]	affects^binding|increases^reaction	15650019
cisplatin	Cisplatin	D002945	15663-27-1	MED21	9412	Homo sapiens	9606	MED21 protein affects the susceptibility to Cisplatin	affects^response to substance	16217747
cisplatin	Cisplatin	D002945	15663-27-1	MED27	9442	Homo sapiens	9606	[Piroxicam co-treated with Cisplatin] results in decreased expression of MED27 mRNA	affects^cotreatment|decreases^expression	21858171
cisplatin	Cisplatin	D002945	15663-27-1	MEIS2	4212	Homo sapiens	9606	Cisplatin results in decreased expression of MEIS2 mRNA	decreases^expression	19561079
cisplatin	Cisplatin	D002945	15663-27-1	MELK	9833	Homo sapiens	9606	Cisplatin results in decreased expression of MELK mRNA	decreases^expression	19561079
cisplatin	Cisplatin	D002945	15663-27-1	MEST	4232	Homo sapiens	9606	MEST protein affects the susceptibility to Cisplatin	affects^response to substance	16217747
cisplatin	Cisplatin	D002945	15663-27-1	MET	4233	Homo sapiens	9606	Cisplatin promotes the reaction [5-((2,6-dichlorobenzyl)sulfonyl)-3-((3,5-dimethyl-4-((2-(pyrrolidin-1-ylmethyl)pyrrolidin-1-yl)carbonyl)-1H-pyrrol-2-yl)methylene)-1,3-dihydro-2H-indol-2-one results in decreased phosphorylation of MET protein]	decreases^phosphorylation|increases^reaction	20661229
cisplatin	Cisplatin	D002945	15663-27-1	MET	4233	Homo sapiens	9606	Cisplatin results in decreased phosphorylation of MET protein	decreases^phosphorylation	20661229
cisplatin	Cisplatin	D002945	15663-27-1	METTL21B	25895	Homo sapiens	9606	Cisplatin results in increased expression of METTL21B mRNA	increases^expression	19561079
cisplatin	Cisplatin	D002945	15663-27-1	METTL6	131965	Homo sapiens	9606	METTL6 results in increased susceptibility to Cisplatin	increases^response to substance	21775533
cisplatin	Cisplatin	D002945	15663-27-1	MFGE8	4240	Homo sapiens	9606	MFGE8 protein results in decreased susceptibility to Cisplatin	decreases^response to substance	21127199
cisplatin	Cisplatin	D002945	15663-27-1	MFN1	55669	Homo sapiens	9606	MFN1 protein results in decreased susceptibility to Cisplatin	decreases^response to substance	21160028
cisplatin	Cisplatin	D002945	15663-27-1	MFSD5	84975	Homo sapiens	9606	Cisplatin results in increased expression of MFSD5 mRNA	increases^expression	19561079
cisplatin	Cisplatin	D002945	15663-27-1	MGAT2	4247	Homo sapiens	9606	Cisplatin inhibits the reaction [Piroxicam results in decreased expression of MGAT2 mRNA]	decreases^expression|decreases^reaction	21858171
cisplatin	Cisplatin	D002945	15663-27-1	MGAT3	4248	Homo sapiens	9606	[Cisplatin co-treated with panobinostat] affects the expression of MGAT3 mRNA	affects^cotreatment|affects^expression	21791302
cisplatin	Cisplatin	D002945	15663-27-1	MGMT	4255	Homo sapiens	9606	Cisplatin results in decreased activity of MGMT protein	decreases^activity	15015788|2766459|7562019
cisplatin	Cisplatin	D002945	15663-27-1	MGMT	4255	Homo sapiens	9606	Cisplatin results in decreased expression of MGMT mRNA	decreases^expression	15809756|16043385
cisplatin	Cisplatin	D002945	15663-27-1	MGMT	4255	Homo sapiens	9606	Cisplatin results in decreased expression of MGMT protein	decreases^expression	16043385
cisplatin	Cisplatin	D002945	15663-27-1	MGMT	4255	Homo sapiens	9606	MGMT protein results in decreased susceptibility to Cisplatin	decreases^response to substance	16043385
cisplatin	Cisplatin	D002945	15663-27-1	MGST1	4257	Homo sapiens	9606	MGST1 protein results in decreased susceptibility to Cisplatin	decreases^response to substance	20727966
cisplatin	Cisplatin	D002945	15663-27-1	MICU1	10367	Homo sapiens	9606	Cisplatin results in decreased expression of MICU1 mRNA	decreases^expression	19561079
cisplatin	Cisplatin	D002945	15663-27-1	MINK1	50488	Homo sapiens	9606	Cisplatin inhibits the reaction [Piroxicam results in increased expression of MINK1 mRNA]	decreases^reaction|increases^expression	21858171
cisplatin	Cisplatin	D002945	15663-27-1	MIR138-1	406929	Homo sapiens	9606	H2AFX gene mutant form inhibits the reaction [MIR138-1 results in increased susceptibility to Cisplatin]	decreases^reaction|increases^response to substance	21693595
cisplatin	Cisplatin	D002945	15663-27-1	MIR138-1	406929	Homo sapiens	9606	[MIR138-1 results in decreased expression of H2AFX] which results in increased susceptibility to Cisplatin	decreases^expression|increases^response to substance	21693595
cisplatin	Cisplatin	D002945	15663-27-1	MIR138-1	406929	Homo sapiens	9606	MIR138-1 results in increased susceptibility to Cisplatin	increases^response to substance	21693595
cisplatin	Cisplatin	D002945	15663-27-1	MIR141	406933	Homo sapiens	9606	MIR141 results in decreased susceptibility to Cisplatin	decreases^response to substance	21289630
cisplatin	Cisplatin	D002945	15663-27-1	MIR15B	406949	Homo sapiens	9606	Cisplatin results in increased expression of MIR15B mRNA	increases^expression	20145152
cisplatin	Cisplatin	D002945	15663-27-1	MIR185	406961	Homo sapiens	9606	Cisplatin results in increased expression of MIR185	increases^expression	21274007
cisplatin	Cisplatin	D002945	15663-27-1	MIR18B	574033	Homo sapiens	9606	Cisplatin results in decreased expression of MIR18B	decreases^expression	21274007
cisplatin	Cisplatin	D002945	15663-27-1	MIR200C	406985	Homo sapiens	9606	MIR200C results in decreased susceptibility to Cisplatin	decreases^response to substance	21248297
cisplatin	Cisplatin	D002945	15663-27-1	MIR21	406991	Homo sapiens	9606	Cisplatin results in increased expression of MIR21 mRNA	increases^expression	20145152
cisplatin	Cisplatin	D002945	15663-27-1	MIR22	407004	Homo sapiens	9606	Cisplatin results in decreased expression of MIR22	decreases^expression	21274007
cisplatin	Cisplatin	D002945	15663-27-1	MIR22HG	84981	Homo sapiens	9606	Cisplatin results in increased expression of MIR22HG mRNA	increases^expression	19561079|21603599
cisplatin	Cisplatin	D002945	15663-27-1	MIR23A	407010	Homo sapiens	9606	Cisplatin results in increased expression of MIR23A mRNA	increases^expression	20145152
cisplatin	Cisplatin	D002945	15663-27-1	MIR24-2	407013	Homo sapiens	9606	MIR24-2 results in increased susceptibility to Cisplatin	increases^response to substance	21463514
cisplatin	Cisplatin	D002945	15663-27-1	MIR25	407014	Homo sapiens	9606	Cisplatin results in increased expression of MIR25 mRNA	increases^expression	20145152
cisplatin	Cisplatin	D002945	15663-27-1	MIR297	100126354	Homo sapiens	9606	Cisplatin results in increased expression of MIR297	increases^expression	21274007
cisplatin	Cisplatin	D002945	15663-27-1	MIR29C	407026	Homo sapiens	9606	Cisplatin results in decreased expression of MIR29C	decreases^expression	21274007
cisplatin	Cisplatin	D002945	15663-27-1	MIR323B	574410	Homo sapiens	9606	Cisplatin results in increased expression of MIR323B	increases^expression	21274007
cisplatin	Cisplatin	D002945	15663-27-1	MIR339	442907	Homo sapiens	9606	Cisplatin results in increased expression of MIR339 mRNA	increases^expression	20145152
cisplatin	Cisplatin	D002945	15663-27-1	MIR34A	407040	Homo sapiens	9606	[[MIR34A binds to MAGEA12 3' UTR] which results in decreased expression of MAGEA12 protein] which results in increased susceptibility to Cisplatin	affects^binding|decreases^expression|increases^response to substance	21177782
cisplatin	Cisplatin	D002945	15663-27-1	MIR34A	407040	Homo sapiens	9606	[[MIR34A binds to MAGEA3 3' UTR] which results in decreased expression of MAGEA3 protein] which results in increased susceptibility to Cisplatin	affects^binding|decreases^expression|increases^response to substance	21177782
cisplatin	Cisplatin	D002945	15663-27-1	MIR34A	407040	Homo sapiens	9606	[[MIR34A binds to MAGEA6 3' UTR] which results in decreased expression of MAGEA6 protein] which results in increased susceptibility to Cisplatin	affects^binding|decreases^expression|increases^response to substance	21177782
cisplatin	Cisplatin	D002945	15663-27-1	MIR374A	442919	Homo sapiens	9606	Cisplatin results in increased expression of MIR374A mRNA	increases^expression	20145152
cisplatin	Cisplatin	D002945	15663-27-1	MIR376C	442913	Homo sapiens	9606	ACVR1C protein inhibits the reaction [MIR376C results in decreased susceptibility to Cisplatin]	decreases^reaction|decreases^response to substance	21224400
cisplatin	Cisplatin	D002945	15663-27-1	MIR376C	442913	Homo sapiens	9606	Cisplatin results in decreased expression of MIR376C mRNA	decreases^expression	21224400
cisplatin	Cisplatin	D002945	15663-27-1	MIR376C	442913	Homo sapiens	9606	MIR376C results in decreased susceptibility to Cisplatin	decreases^response to substance	21224400
cisplatin	Cisplatin	D002945	15663-27-1	MIR497	574456	Homo sapiens	9606	[MIR497 results in decreased expression of BCL2 protein] which results in increased susceptibility to Cisplatin	decreases^expression|increases^response to substance	21258880
cisplatin	Cisplatin	D002945	15663-27-1	MIR572	693157	Homo sapiens	9606	Cisplatin results in increased expression of MIR572 mRNA	increases^expression	20145152
cisplatin	Cisplatin	D002945	15663-27-1	MIR574	693159	Homo sapiens	9606	Cisplatin results in increased expression of MIR574	increases^expression	21274007
cisplatin	Cisplatin	D002945	15663-27-1	MIR574	693159	Homo sapiens	9606	Cisplatin results in increased expression of MIR574 mRNA	increases^expression	20145152
cisplatin	Cisplatin	D002945	15663-27-1	MIR622	693207	Homo sapiens	9606	Cisplatin results in decreased expression of MIR622 mRNA	decreases^expression	20145152
cisplatin	Cisplatin	D002945	15663-27-1	MIR622	693207	Homo sapiens	9606	MIR622 mRNA results in increased susceptibility to Cisplatin	increases^response to substance	20145152
cisplatin	Cisplatin	D002945	15663-27-1	MIR629	693214	Homo sapiens	9606	Cisplatin results in increased expression of MIR629 mRNA	increases^expression	20145152
cisplatin	Cisplatin	D002945	15663-27-1	MIR630	693215	Homo sapiens	9606	Cisplatin promotes the reaction [MIR630 mRNA results in increased expression of CDKN1B protein]	increases^expression|increases^reaction	20145152
cisplatin	Cisplatin	D002945	15663-27-1	MIR630	693215	Homo sapiens	9606	Cisplatin promotes the reaction [TP63 protein modified form results in increased expression of MIR630]	increases^expression|increases^reaction	21274007
cisplatin	Cisplatin	D002945	15663-27-1	MIR630	693215	Homo sapiens	9606	[Cisplatin results in increased expression of DICER1 protein] which results in increased metabolism of MIR630	increases^expression|increases^metabolic processing	21274007
cisplatin	Cisplatin	D002945	15663-27-1	MIR630	693215	Homo sapiens	9606	Cisplatin results in increased expression of MIR630	increases^expression	21274007
cisplatin	Cisplatin	D002945	15663-27-1	MIR630	693215	Homo sapiens	9606	Cisplatin results in increased expression of MIR630 mRNA	increases^expression	20145152
cisplatin	Cisplatin	D002945	15663-27-1	MIR630	693215	Homo sapiens	9606	[Cisplatin results in increased expression of MIR630] which results in decreased expression of BCL2L2 mRNA	decreases^expression|increases^expression	21274007
cisplatin	Cisplatin	D002945	15663-27-1	MIR630	693215	Homo sapiens	9606	[Cisplatin results in increased expression of MIR630] which results in decreased expression of BCL2 mRNA	decreases^expression|increases^expression	21274007
cisplatin	Cisplatin	D002945	15663-27-1	MIR630	693215	Homo sapiens	9606	[Cisplatin results in increased expression of MIR630] which results in decreased expression of YAP1 mRNA	decreases^expression|increases^expression	21274007
cisplatin	Cisplatin	D002945	15663-27-1	MIR630	693215	Homo sapiens	9606	[Cisplatin results in increased phosphorylation of TP63 protein alternative form] promotes the reaction [TP63 protein modified form binds to MIR630 promoter]	affects^binding|increases^phosphorylation|increases^reaction	21274007
cisplatin	Cisplatin	D002945	15663-27-1	MIR630	693215	Homo sapiens	9606	MIR630 mRNA inhibits the reaction [Cisplatin promotes the reaction [BAX protein binds to BAX protein]]	affects^binding|decreases^reaction|increases^reaction	20145152
cisplatin	Cisplatin	D002945	15663-27-1	MIR630	693215	Homo sapiens	9606	MIR630 mRNA inhibits the reaction [Cisplatin results in increased cleavage of CASP3 protein]	decreases^reaction|increases^cleavage	20145152
cisplatin	Cisplatin	D002945	15663-27-1	MIR630	693215	Homo sapiens	9606	MIR630 mRNA inhibits the reaction [Cisplatin results in increased cleavage of CASP9 protein]	decreases^reaction|increases^cleavage	20145152
cisplatin	Cisplatin	D002945	15663-27-1	MIR630	693215	Homo sapiens	9606	MIR630 mRNA inhibits the reaction [Cisplatin results in increased expression of BAX protein]	decreases^reaction|increases^expression	20145152
cisplatin	Cisplatin	D002945	15663-27-1	MIR630	693215	Homo sapiens	9606	MIR630 mRNA inhibits the reaction [Cisplatin results in increased phosphorylation of and results in increased activity of ATM protein]	decreases^reaction|increases^activity|increases^phosphorylation	20145152
cisplatin	Cisplatin	D002945	15663-27-1	MIR630	693215	Homo sapiens	9606	MIR630 mRNA inhibits the reaction [Cisplatin results in increased phosphorylation of H2AFX protein]	decreases^reaction|increases^phosphorylation	20145152
cisplatin	Cisplatin	D002945	15663-27-1	MIR630	693215	Homo sapiens	9606	MIR630 mRNA inhibits the reaction [Cisplatin results in increased phosphorylation of TP53 protein]	decreases^reaction|increases^phosphorylation	20145152
cisplatin	Cisplatin	D002945	15663-27-1	MIR630	693215	Homo sapiens	9606	MIR630 mRNA results in decreased susceptibility to Cisplatin	decreases^response to substance	20145152
cisplatin	Cisplatin	D002945	15663-27-1	MIR638	693223	Homo sapiens	9606	Cisplatin results in increased expression of MIR638 mRNA	increases^expression	20145152
cisplatin	Cisplatin	D002945	15663-27-1	MIR663A	724033	Homo sapiens	9606	Cisplatin results in increased expression of MIR663A mRNA	increases^expression	20145152
cisplatin	Cisplatin	D002945	15663-27-1	MIR760	100126348	Homo sapiens	9606	Cisplatin results in increased expression of MIR760	increases^expression	21274007
cisplatin	Cisplatin	D002945	15663-27-1	MIR98	407054	Homo sapiens	9606	Cisplatin results in decreased expression of MIR98	decreases^expression	21274007
cisplatin	Cisplatin	D002945	15663-27-1	MIS18A	54069	Homo sapiens	9606	Cisplatin promotes the reaction [Piroxicam results in decreased expression of MIS18A mRNA]	decreases^expression|increases^reaction	21858171
cisplatin	Cisplatin	D002945	15663-27-1	MKI67IP	84365	Homo sapiens	9606	Cisplatin results in increased expression of MKI67IP mRNA	increases^expression	19561079
cisplatin	Cisplatin	D002945	15663-27-1	MLH1	4292	Homo sapiens	9606	Cisplatin affects the localization of MLH1 protein	affects^localization	21064154
cisplatin	Cisplatin	D002945	15663-27-1	MLL	4297	Homo sapiens	9606	MLL protein affects the susceptibility to Cisplatin	affects^response to substance	16217747
cisplatin	Cisplatin	D002945	15663-27-1	MMP10	4319	Homo sapiens	9606	Cisplatin results in increased expression of MMP10 mRNA	increases^expression	12066199
cisplatin	Cisplatin	D002945	15663-27-1	MMP15	4324	Homo sapiens	9606	Cisplatin results in increased expression of MMP15 mRNA	increases^expression	12066199
cisplatin	Cisplatin	D002945	15663-27-1	MMP16	4325	Homo sapiens	9606	Cisplatin results in increased expression of MMP16 mRNA	increases^expression	12066199
cisplatin	Cisplatin	D002945	15663-27-1	MMP2	4313	Homo sapiens	9606	Cisplatin results in increased activity of MMP2 protein	increases^activity	21618587
cisplatin	Cisplatin	D002945	15663-27-1	MMP2	4313	Homo sapiens	9606	Cisplatin results in increased expression of MMP2 mRNA	increases^expression	21618587
cisplatin	Cisplatin	D002945	15663-27-1	MMP3	4314	Homo sapiens	9606	MMP3 promoter polymorphism affects the susceptibility to [Fluorouracil co-treated with Cisplatin]	affects^cotreatment|affects^response to substance	15102660
cisplatin	Cisplatin	D002945	15663-27-1	MMP9	4318	Homo sapiens	9606	[[BSG binds to PPIA] which results in decreased susceptibility to Cisplatin] which results in increased expression of MMP9	affects^binding|decreases^response to substance|increases^expression	21956400
cisplatin	Cisplatin	D002945	15663-27-1	MMP9	4318	Homo sapiens	9606	Cisplatin results in decreased expression of MMP9	decreases^expression	21789004
cisplatin	Cisplatin	D002945	15663-27-1	MMP9	4318	Homo sapiens	9606	Cisplatin results in increased activity of MMP9 protein	increases^activity	21618587
cisplatin	Cisplatin	D002945	15663-27-1	MNAT1	4331	Homo sapiens	9606	Cisplatin results in decreased expression of MNAT1 mRNA	decreases^expression	19561079
cisplatin	Cisplatin	D002945	15663-27-1	MPG	4350	Homo sapiens	9606	Cisplatin analog binds to and affects the activity of MPG protein	affects^activity|affects^binding	10891085
cisplatin	Cisplatin	D002945	15663-27-1	MPO	4353	Homo sapiens	9606	MPO gene polymorphism affects the susceptibility to Cisplatin	affects^response to substance	16785472
cisplatin	Cisplatin	D002945	15663-27-1	MPP2	4355	Homo sapiens	9606	MPP2 protein affects the susceptibility to Cisplatin	affects^response to substance	16217747
cisplatin	Cisplatin	D002945	15663-27-1	MPP2	4355	Homo sapiens	9606	MPP2 results in decreased susceptibility to Cisplatin	decreases^response to substance	21652733
cisplatin	Cisplatin	D002945	15663-27-1	MPRIP	23164	Homo sapiens	9606	Cisplatin results in decreased expression of MPRIP mRNA	decreases^expression	19561079
cisplatin	Cisplatin	D002945	15663-27-1	MRPL49	740	Homo sapiens	9606	Cisplatin results in increased expression of MRPL49 mRNA	increases^expression	19561079
cisplatin	Cisplatin	D002945	15663-27-1	MRPS27	23107	Homo sapiens	9606	MRPS27 affects the susceptibility to Cisplatin	affects^response to substance	15756446
cisplatin	Cisplatin	D002945	15663-27-1	MSF	44141	Homo sapiens	9606	Cisplatin results in decreased expression of MSF mRNA	decreases^expression	19561079
cisplatin	Cisplatin	D002945	15663-27-1	MSH2	4436	Homo sapiens	9606	Cisplatin promotes the reaction [MSH2 protein binds to and affects the localization of ATR protein]	affects^binding|affects^localization|increases^reaction	21285353
cisplatin	Cisplatin	D002945	15663-27-1	MSH2	4436	Homo sapiens	9606	MSH2 protein promotes the reaction [Cisplatin results in increased expression of BBC3 protein]	increases^expression|increases^reaction	21285353
cisplatin	Cisplatin	D002945	15663-27-1	MSH2	4436	Homo sapiens	9606	MSH2 protein promotes the reaction [Cisplatin results in increased phosphorylation of CHEK2 protein]	increases^phosphorylation|increases^reaction	21285353
cisplatin	Cisplatin	D002945	15663-27-1	MSH2	4436	Homo sapiens	9606	MSH2 protein promotes the reaction [Cisplatin results in increased phosphorylation of TP53 protein]	increases^phosphorylation|increases^reaction	21285353
cisplatin	Cisplatin	D002945	15663-27-1	MSH2	4436	Homo sapiens	9606	MSH2 protein results in increased susceptibility to Cisplatin	increases^response to substance	21285353
cisplatin	Cisplatin	D002945	15663-27-1	MSH3	4437	Homo sapiens	9606	MSH3 protein results in decreased susceptibility to Cisplatin	decreases^response to substance	21285347
cisplatin	Cisplatin	D002945	15663-27-1	MT1A	4489	Homo sapiens	9606	Cisplatin results in increased expression of MT1A mRNA	increases^expression	12680227
cisplatin	Cisplatin	D002945	15663-27-1	MT1F	4494	Homo sapiens	9606	MT1F protein affects the susceptibility to Cisplatin	affects^response to substance	16217747
cisplatin	Cisplatin	D002945	15663-27-1	MT1G	4495	Homo sapiens	9606	MT1G protein results in decreased susceptibility to Cisplatin	decreases^response to substance	22639083
cisplatin	Cisplatin	D002945	15663-27-1	MT1G	4495	Homo sapiens	9606	propargylglycine inhibits the reaction [MT1G protein results in decreased susceptibility to Cisplatin]	decreases^reaction|decreases^response to substance	22639083
cisplatin	Cisplatin	D002945	15663-27-1	MT1H	4496	Homo sapiens	9606	[STK17A protein results in decreased expression of MT1H mRNA] which results in increased susceptibility to Cisplatin	decreases^expression|increases^response to substance	21489989
cisplatin	Cisplatin	D002945	15663-27-1	MT1M	4499	Homo sapiens	9606	[STK17A protein results in decreased expression of MT1M mRNA] which results in increased susceptibility to Cisplatin	decreases^expression|increases^response to substance	21489989
cisplatin	Cisplatin	D002945	15663-27-1	MT1X	4501	Homo sapiens	9606	MT1X protein results in decreased susceptibility to Cisplatin	decreases^response to substance	22639083
cisplatin	Cisplatin	D002945	15663-27-1	MT1X	4501	Homo sapiens	9606	propargylglycine inhibits the reaction [MT1X protein results in decreased susceptibility to Cisplatin]	decreases^reaction|decreases^response to substance	22639083
cisplatin	Cisplatin	D002945	15663-27-1	MT1X	4501	Homo sapiens	9606	[STK17A protein results in decreased expression of MT1X mRNA] which results in increased susceptibility to Cisplatin	decreases^expression|increases^response to substance	21489989
cisplatin	Cisplatin	D002945	15663-27-1	MT2A	4502	Homo sapiens	9606	Cisplatin results in increased expression of MT2A mRNA	increases^expression	12680227
cisplatin	Cisplatin	D002945	15663-27-1	MT2A	4502	Homo sapiens	9606	MT2A protein results in decreased susceptibility to Cisplatin	decreases^response to substance	16394183
cisplatin	Cisplatin	D002945	15663-27-1	MT3	4504	Homo sapiens	9606	Cisplatin results in increased expression of MT3 mRNA	increases^expression	16061661
cisplatin	Cisplatin	D002945	15663-27-1	MT3	4504	Homo sapiens	9606	Folic Acid affects the reaction [Cisplatin affects the expression of MT3 mRNA]	affects^expression|affects^reaction	16898872
cisplatin	Cisplatin	D002945	15663-27-1	MTHFD1L	25902	Homo sapiens	9606	Cisplatin results in decreased expression of MTHFD1L mRNA	decreases^expression	19561079
cisplatin	Cisplatin	D002945	15663-27-1	MTOR	2475	Homo sapiens	9606	Cisplatin promotes the reaction [temsirolimus inhibits the reaction [MTOR protein results in increased phosphorylation of EIF4EBP1 protein]]	decreases^reaction|increases^phosphorylation|increases^reaction	21358348
cisplatin	Cisplatin	D002945	15663-27-1	MTOR	2475	Homo sapiens	9606	Cisplatin promotes the reaction [temsirolimus inhibits the reaction [MTOR protein results in increased phosphorylation of RPS6 protein]]	decreases^reaction|increases^phosphorylation|increases^reaction	21358348
cisplatin	Cisplatin	D002945	15663-27-1	MTOR	2475	Homo sapiens	9606	Cisplatin results in decreased phosphorylation of MTOR protein	decreases^phosphorylation	18058806
cisplatin	Cisplatin	D002945	15663-27-1	MTOR	2475	Homo sapiens	9606	Cisplatin results in increased phosphorylation of MTOR protein	increases^phosphorylation	20935474
cisplatin	Cisplatin	D002945	15663-27-1	MTOR	2475	Homo sapiens	9606	[Cisplatin results in increased phosphorylation of TP63 protein alternative form] which results in decreased expression of MTOR protein	decreases^expression|increases^phosphorylation	21191146
cisplatin	Cisplatin	D002945	15663-27-1	MTOR	2475	Homo sapiens	9606	Sirolimus promotes the reaction [Cisplatin results in decreased phosphorylation of MTOR protein]	decreases^phosphorylation|increases^reaction	18058806
cisplatin	Cisplatin	D002945	15663-27-1	MTOR	2475	Homo sapiens	9606	Topotecan inhibits the reaction [Cisplatin results in increased phosphorylation of MTOR protein]	decreases^reaction|increases^phosphorylation	20935474
cisplatin	Cisplatin	D002945	15663-27-1	MTUS1	57509	Homo sapiens	9606	Cisplatin results in increased expression of MTUS1	increases^expression	22025929
cisplatin	Cisplatin	D002945	15663-27-1	MUC16	94025	Homo sapiens	9606	[Paclitaxel co-treated with Cisplatin] results in decreased expression of MUC16 protein	affects^cotreatment|decreases^expression	8751544
cisplatin	Cisplatin	D002945	15663-27-1	MUT	4594	Homo sapiens	9606	Cisplatin affects the expression of MUT mRNA mutant form	affects^expression	19427250
cisplatin	Cisplatin	D002945	15663-27-1	MUT	4594	Homo sapiens	9606	Cisplatin affects the expression of MUT protein mutant form	affects^expression	19427250
cisplatin	Cisplatin	D002945	15663-27-1	MUT	4594	Homo sapiens	9606	Cisplatin results in increased expression of MUT mRNA	increases^expression	19199343
cisplatin	Cisplatin	D002945	15663-27-1	MUT	4594	Homo sapiens	9606	Cisplatin results in increased expression of MUT protein	increases^expression	19199343
cisplatin	Cisplatin	D002945	15663-27-1	MYC	4609	Homo sapiens	9606	Cisplatin promotes the reaction [MYC protein binds to GCLC promoter]	affects^binding|increases^reaction	17628013
cisplatin	Cisplatin	D002945	15663-27-1	MYC	4609	Homo sapiens	9606	Cisplatin promotes the reaction [MYC protein binds to GCLM promoter]	affects^binding|increases^reaction	17628013
cisplatin	Cisplatin	D002945	15663-27-1	MYC	4609	Homo sapiens	9606	Cisplatin results in decreased expression of MYC mRNA	decreases^expression	11099651
cisplatin	Cisplatin	D002945	15663-27-1	MYC	4609	Homo sapiens	9606	Cisplatin results in decreased expression of MYC protein	decreases^expression	16797627|16803524
cisplatin	Cisplatin	D002945	15663-27-1	MYC	4609	Homo sapiens	9606	MYC protein inhibits the reaction [Cisplatin results in increased abundance of Reactive Oxygen Species]	decreases^reaction|increases^abundance	17628013
cisplatin	Cisplatin	D002945	15663-27-1	MYC	4609	Homo sapiens	9606	MYC protein promotes the reaction [AURKA protein results in decreased susceptibility to Cisplatin]	decreases^response to substance|increases^reaction	20890087
cisplatin	Cisplatin	D002945	15663-27-1	MYC	4609	Homo sapiens	9606	MYC protein promotes the reaction [Cisplatin results in increased cleavage of CASP9 protein]	increases^cleavage|increases^reaction	21324178
cisplatin	Cisplatin	D002945	15663-27-1	MYC	4609	Homo sapiens	9606	MYC protein results in decreased susceptibility to Cisplatin	decreases^response to substance	17628013|21447800
cisplatin	Cisplatin	D002945	15663-27-1	MYC	4609	Homo sapiens	9606	MYC protein results in increased susceptibility to Cisplatin	increases^response to substance	21324178
cisplatin	Cisplatin	D002945	15663-27-1	MYCBP	26292	Homo sapiens	9606	Cisplatin inhibits the reaction [Piroxicam results in decreased expression of MYCBP mRNA]	decreases^expression|decreases^reaction	21858171
cisplatin	Cisplatin	D002945	15663-27-1	MYH10	4628	Homo sapiens	9606	Cisplatin results in decreased expression of MYH10 mRNA	decreases^expression	19561079
cisplatin	Cisplatin	D002945	15663-27-1	NAB1	4664	Homo sapiens	9606	NAB1 protein affects the susceptibility to Cisplatin	affects^response to substance	16217747
cisplatin	Cisplatin	D002945	15663-27-1	NACC1	112939	Homo sapiens	9606	3-methyladenosine affects the reaction [NACC1 affects the susceptibility to Cisplatin]	affects^reaction|affects^response to substance	21743489
cisplatin	Cisplatin	D002945	15663-27-1	NACC1	112939	Homo sapiens	9606	ATG5 affects the reaction [NACC1 affects the susceptibility to Cisplatin]	affects^reaction|affects^response to substance	21743489
cisplatin	Cisplatin	D002945	15663-27-1	NACC1	112939	Homo sapiens	9606	BECN1 affects the reaction [NACC1 affects the susceptibility to Cisplatin]	affects^reaction|affects^response to substance	21743489
cisplatin	Cisplatin	D002945	15663-27-1	NACC1	112939	Homo sapiens	9606	Chloroquine affects the reaction [NACC1 affects the susceptibility to Cisplatin]	affects^reaction|affects^response to substance	21743489
cisplatin	Cisplatin	D002945	15663-27-1	NACC1	112939	Homo sapiens	9606	NACC1 affects the susceptibility to Cisplatin	affects^response to substance	21743489
cisplatin	Cisplatin	D002945	15663-27-1	NAIP	4671	Homo sapiens	9606	Cisplatin results in decreased expression of NAIP mRNA	decreases^expression	11911975
cisplatin	Cisplatin	D002945	15663-27-1	NAIP	4671	Homo sapiens	9606	NAIP protein results in decreased susceptibility to Cisplatin	decreases^response to substance	11911975|14654915
cisplatin	Cisplatin	D002945	15663-27-1	NANOG	79923	Homo sapiens	9606	[Cisplatin results in decreased susceptibility to Cisplatin] which results in increased expression of NANOG mRNA	decreases^response to substance|increases^expression	21342274
cisplatin	Cisplatin	D002945	15663-27-1	NANOG	79923	Homo sapiens	9606	[Cisplatin results in decreased susceptibility to Cisplatin] which results in increased expression of NANOG protein	decreases^response to substance|increases^expression	21342274
cisplatin	Cisplatin	D002945	15663-27-1	NANOG	79923	Homo sapiens	9606	Cisplatin results in increased expression of NANOG mRNA	increases^expression	21618587
cisplatin	Cisplatin	D002945	15663-27-1	NANOG	79923	Homo sapiens	9606	Cisplatin results in increased expression of NANOG protein	increases^expression	21618587
cisplatin	Cisplatin	D002945	15663-27-1	NAV1	89796	Homo sapiens	9606	Cisplatin results in decreased expression of NAV1 mRNA	decreases^expression	19561079
cisplatin	Cisplatin	D002945	15663-27-1	NAV2	89797	Homo sapiens	9606	Cisplatin results in decreased expression of NAV2 mRNA	decreases^expression	19561079
cisplatin	Cisplatin	D002945	15663-27-1	NBR1	4077	Homo sapiens	9606	Cisplatin inhibits the reaction [Piroxicam results in decreased expression of NBR1 mRNA]	decreases^expression|decreases^reaction	21858171
cisplatin	Cisplatin	D002945	15663-27-1	NCAPD3	23310	Homo sapiens	9606	Cisplatin inhibits the reaction [Piroxicam results in decreased expression of NCAPD3 mRNA]	decreases^expression|decreases^reaction	21858171
cisplatin	Cisplatin	D002945	15663-27-1	NCAPH	23397	Homo sapiens	9606	Cisplatin inhibits the reaction [Piroxicam results in decreased expression of NCAPH mRNA]	decreases^expression|decreases^reaction	21858171
cisplatin	Cisplatin	D002945	15663-27-1	NCBP2	22916	Homo sapiens	9606	Cisplatin results in increased expression of NCBP2 mRNA	increases^expression	19561079
cisplatin	Cisplatin	D002945	15663-27-1	NCOA3	8202	Homo sapiens	9606	Cisplatin promotes the reaction [NR1I2 protein binds to NCOA3 protein]	affects^binding|increases^reaction	15650019
cisplatin	Cisplatin	D002945	15663-27-1	NDC80	10403	Homo sapiens	9606	Cisplatin affects the reaction [Piroxicam results in decreased expression of NDC80 mRNA]	affects^reaction|decreases^expression	21858171
cisplatin	Cisplatin	D002945	15663-27-1	NDUFS8	4728	Homo sapiens	9606	NDUFS8 protein affects the susceptibility to Cisplatin	affects^response to substance	16217747
cisplatin	Cisplatin	D002945	15663-27-1	NEAT1	283131	Homo sapiens	9606	NEAT1 protein affects the susceptibility to Cisplatin	affects^response to substance	16217747
cisplatin	Cisplatin	D002945	15663-27-1	NEDD4L	23327	Homo sapiens	9606	Cisplatin results in decreased expression of NEDD4L mRNA	decreases^expression	19561079
cisplatin	Cisplatin	D002945	15663-27-1	NEDD9	4739	Homo sapiens	9606	NEDD9 protein affects the susceptibility to Cisplatin	affects^response to substance	16217747
cisplatin	Cisplatin	D002945	15663-27-1	NES	10763	Homo sapiens	9606	[Cisplatin results in decreased susceptibility to Cisplatin] which results in increased expression of NES mRNA	decreases^response to substance|increases^expression	21342274
cisplatin	Cisplatin	D002945	15663-27-1	NES	10763	Homo sapiens	9606	[Cisplatin results in decreased susceptibility to Cisplatin] which results in increased expression of NES protein	decreases^response to substance|increases^expression	21342274
cisplatin	Cisplatin	D002945	15663-27-1	NFATC3	4775	Homo sapiens	9606	[Piroxicam co-treated with Cisplatin] results in increased expression of NFATC3 mRNA	affects^cotreatment|increases^expression	21858171
cisplatin	Cisplatin	D002945	15663-27-1	NFE2L1	4779	Homo sapiens	9606	Cisplatin promotes the reaction [Piroxicam results in decreased expression of NFE2L1 mRNA]	decreases^expression|increases^reaction	21858171
cisplatin	Cisplatin	D002945	15663-27-1	NFE2L2	4780	Homo sapiens	9606	[brusatol results in increased ubiquitination of and results in increased degradation of NFE2L2 protein] which results in increased susceptibility to Cisplatin	increases^degradation|increases^response to substance|increases^ubiquitination	21205897
cisplatin	Cisplatin	D002945	15663-27-1	NFE2L2	4780	Homo sapiens	9606	NFE2L2 protein results in decreased susceptibility to Cisplatin	decreases^response to substance	21489257
cisplatin	Cisplatin	D002945	15663-27-1	NFE2L2	4780	Homo sapiens	9606	NFE2L2 results in decreased susceptibility to Cisplatin	decreases^response to substance	21842204
cisplatin	Cisplatin	D002945	15663-27-1	NFIB	4781	Homo sapiens	9606	Cisplatin results in decreased expression of NFIB mRNA	decreases^expression	19561079
cisplatin	Cisplatin	D002945	15663-27-1	NFIC	4782	Homo sapiens	9606	Cisplatin results in decreased expression of NFIC mRNA	decreases^expression	19561079
cisplatin	Cisplatin	D002945	15663-27-1	NFKB1	4790	Homo sapiens	9606	Cisplatin results in increased localization of NFKB1 protein	increases^localization	20959455
cisplatin	Cisplatin	D002945	15663-27-1	NFKB1	4790	Homo sapiens	9606	NFKB1 protein affects the susceptibility to Cisplatin	affects^response to substance	21720550
cisplatin	Cisplatin	D002945	15663-27-1	NFYA	4800	Homo sapiens	9606	Cisplatin promotes the reaction [NFYA protein binds to TP63 protein]	affects^binding|increases^reaction	20959455
cisplatin	Cisplatin	D002945	15663-27-1	NFYA	4800	Homo sapiens	9606	Cisplatin results in increased expression of NFYA protein	increases^expression	20959455
cisplatin	Cisplatin	D002945	15663-27-1	NFYA	4800	Homo sapiens	9606	TP63 protein alternative form promotes the reaction [Cisplatin results in increased expression of NFYA protein]	increases^expression|increases^reaction	20959455
cisplatin	Cisplatin	D002945	15663-27-1	NHS	4810	Homo sapiens	9606	Cisplatin results in decreased expression of NHS mRNA	decreases^expression	19561079
cisplatin	Cisplatin	D002945	15663-27-1	NINJ1	4814	Homo sapiens	9606	Cisplatin results in increased expression of NINJ1 mRNA	increases^expression	21532991
cisplatin	Cisplatin	D002945	15663-27-1	NISCH	11188	Homo sapiens	9606	[Piroxicam co-treated with Cisplatin] results in decreased expression of NISCH mRNA	affects^cotreatment|decreases^expression	21858171
cisplatin	Cisplatin	D002945	15663-27-1	NKX2-5	1482	Homo sapiens	9606	Cisplatin results in increased expression of NKX2-5 mRNA	increases^expression	19561079
cisplatin	Cisplatin	D002945	15663-27-1	NKX3-1	4824	Homo sapiens	9606	Cisplatin results in increased expression of NKX3-1 mRNA	increases^expression	19561079
cisplatin	Cisplatin	D002945	15663-27-1	NLE1	54475	Homo sapiens	9606	Cisplatin inhibits the reaction [Piroxicam results in decreased expression of NLE1 mRNA]	decreases^expression|decreases^reaction	21858171
cisplatin	Cisplatin	D002945	15663-27-1	NLRP1	22861	Homo sapiens	9606	[Cisplatin co-treated with panobinostat] affects the expression of NLRP1 mRNA	affects^cotreatment|affects^expression	21791302
cisplatin	Cisplatin	D002945	15663-27-1	NMA	117226	Homo sapiens	9606	Cisplatin results in increased expression of NMA mRNA	increases^expression	19561079
cisplatin	Cisplatin	D002945	15663-27-1	NME1	4830	Homo sapiens	9606	Cisplatin results in increased expression of NME1 protein	increases^expression	21924258
cisplatin	Cisplatin	D002945	15663-27-1	NME7	29922	Homo sapiens	9606	[Piroxicam co-treated with Cisplatin] results in increased expression of NME7 mRNA	affects^cotreatment|increases^expression	21858171
cisplatin	Cisplatin	D002945	15663-27-1	NMI	9111	Homo sapiens	9606	NMI protein results in decreased susceptibility to Cisplatin	decreases^response to substance	16734730
cisplatin	Cisplatin	D002945	15663-27-1	NMNAT2	23057	Homo sapiens	9606	[Cisplatin co-treated with panobinostat] affects the expression of NMNAT2 mRNA	affects^cotreatment|affects^expression	21791302
cisplatin	Cisplatin	D002945	15663-27-1	NMU	10874	Homo sapiens	9606	NMU protein affects the susceptibility to Cisplatin	affects^response to substance	16217747
cisplatin	Cisplatin	D002945	15663-27-1	NOD1	10392	Homo sapiens	9606	Cisplatin results in increased expression of NOD1 mRNA	increases^expression	21278888
cisplatin	Cisplatin	D002945	15663-27-1	NOD1	10392	Homo sapiens	9606	Cisplatin results in increased expression of NOD1 protein	increases^expression	21278888
cisplatin	Cisplatin	D002945	15663-27-1	NODAL	4838	Homo sapiens	9606	Cisplatin results in increased expression of NODAL mRNA	increases^expression	21224400
cisplatin	Cisplatin	D002945	15663-27-1	NODAL	4838	Homo sapiens	9606	NODAL results in increased susceptibility to Cisplatin	increases^response to substance	21224400
cisplatin	Cisplatin	D002945	15663-27-1	NOL8	55035	Homo sapiens	9606	[Piroxicam co-treated with Cisplatin] results in decreased expression of NOL8 mRNA	affects^cotreatment|decreases^expression	21858171
cisplatin	Cisplatin	D002945	15663-27-1	NOS2	4843	Homo sapiens	9606	ADRM1 protein promotes the reaction [Cisplatin inhibits the reaction [IFNG protein results in increased expression of and results in increased activity of NOS2 protein]]	decreases^reaction|increases^activity|increases^expression|increases^reaction	20959455
cisplatin	Cisplatin	D002945	15663-27-1	NOS2	4843	Homo sapiens	9606	Cisplatin inhibits the reaction [IFNG protein results in increased expression of and results in increased activity of NOS2 protein]	decreases^reaction|increases^activity|increases^expression	20959455
cisplatin	Cisplatin	D002945	15663-27-1	NOS2	4843	Homo sapiens	9606	Cisplatin promotes the reaction [NOS2 protein binds to ADRM1 protein binds to UCHL5 protein]	affects^binding|increases^reaction	20959455
cisplatin	Cisplatin	D002945	15663-27-1	NOS2	4843	Homo sapiens	9606	Cisplatin results in increased degradation of NOS2 protein	increases^degradation	20959455
cisplatin	Cisplatin	D002945	15663-27-1	NOS2	4843	Homo sapiens	9606	TP63 protein promotes the reaction [Cisplatin inhibits the reaction [IFNG protein results in increased expression of and results in increased activity of NOS2 protein]]	decreases^reaction|increases^activity|increases^expression|increases^reaction	20959455
cisplatin	Cisplatin	D002945	15663-27-1	NOS2	4843	Homo sapiens	9606	TP63 protein promotes the reaction [Cisplatin promotes the reaction [NOS2 protein binds to ADRM1 protein binds to UCHL5 protein]]	affects^binding|increases^reaction	20959455
cisplatin	Cisplatin	D002945	15663-27-1	NOS2	4843	Homo sapiens	9606	TP63 protein promotes the reaction [Cisplatin results in increased degradation of NOS2 protein]	increases^degradation|increases^reaction	20959455
cisplatin	Cisplatin	D002945	15663-27-1	NOTCH2	4853	Homo sapiens	9606	NOTCH2 protein affects the susceptibility to Cisplatin	affects^response to substance	16217747
cisplatin	Cisplatin	D002945	15663-27-1	NOTCH4	4855	Homo sapiens	9606	Folic Acid affects the reaction [Cisplatin affects the expression of NOTCH4 mRNA]	affects^expression|affects^reaction	16898872
cisplatin	Cisplatin	D002945	15663-27-1	NPIP	9284	Homo sapiens	9606	Cisplatin affects the reaction [Piroxicam results in decreased expression of NPIP mRNA]	affects^reaction|decreases^expression	21858171
cisplatin	Cisplatin	D002945	15663-27-1	NPM1	4869	Homo sapiens	9606	Cisplatin results in increased expression of NPM1 protein	increases^expression	19818359
cisplatin	Cisplatin	D002945	15663-27-1	NR1I2	8856	Homo sapiens	9606	Cisplatin promotes the reaction [NR1I2 protein binds to MED1 protein]	affects^binding|increases^reaction	15650019
cisplatin	Cisplatin	D002945	15663-27-1	NR1I2	8856	Homo sapiens	9606	Cisplatin promotes the reaction [NR1I2 protein binds to NCOA3 protein]	affects^binding|increases^reaction	15650019
cisplatin	Cisplatin	D002945	15663-27-1	NR1I2	8856	Homo sapiens	9606	Cisplatin results in increased activity of NR1I2 protein	increases^activity	15650019
cisplatin	Cisplatin	D002945	15663-27-1	NR4A1	3164	Homo sapiens	9606	NR4A1 protein affects the susceptibility to Cisplatin	affects^response to substance	16217747
cisplatin	Cisplatin	D002945	15663-27-1	NRP1	8829	Homo sapiens	9606	[Piroxicam co-treated with Cisplatin] results in increased expression of NRP1 mRNA	affects^cotreatment|increases^expression	21858171
cisplatin	Cisplatin	D002945	15663-27-1	NSMCE2	286053	Homo sapiens	9606	Cisplatin results in increased expression of NSMCE2 mRNA	increases^expression	19561079
cisplatin	Cisplatin	D002945	15663-27-1	NTHL1	4913	Homo sapiens	9606	Folic Acid affects the reaction [Cisplatin affects the expression of NTHL1 mRNA]	affects^expression|affects^reaction	16898872
cisplatin	Cisplatin	D002945	15663-27-1	NUDT1	4521	Homo sapiens	9606	Cisplatin results in increased expression of NUDT1 protein	increases^expression	16803524
cisplatin	Cisplatin	D002945	15663-27-1	NUMB	8650	Homo sapiens	9606	Cisplatin results in decreased expression of NUMB mRNA	decreases^expression	19561079
cisplatin	Cisplatin	D002945	15663-27-1	NXF1	10482	Homo sapiens	9606	Cisplatin results in increased expression of NXF1 mRNA	increases^expression	19561079
cisplatin	Cisplatin	D002945	15663-27-1	OGFOD1	55239	Homo sapiens	9606	Cisplatin results in decreased expression of OGFOD1 mRNA	decreases^expression	19561079
cisplatin	Cisplatin	D002945	15663-27-1	OGT	8473	Homo sapiens	9606	Cisplatin affects the reaction [Piroxicam results in decreased expression of OGT mRNA]	affects^reaction|decreases^expression	21858171
cisplatin	Cisplatin	D002945	15663-27-1	ONECUT2	9480	Homo sapiens	9606	[Cisplatin co-treated with panobinostat] affects the expression of ONECUT2 mRNA	affects^cotreatment|affects^expression	21791302
cisplatin	Cisplatin	D002945	15663-27-1	OPTN	10133	Homo sapiens	9606	Cisplatin affects the reaction [Piroxicam results in decreased expression of OPTN mRNA]	affects^reaction|decreases^expression	21858171
cisplatin	Cisplatin	D002945	15663-27-1	OPTN	10133	Homo sapiens	9606	OPTN protein affects the susceptibility to Cisplatin	affects^response to substance	16217747
cisplatin	Cisplatin	D002945	15663-27-1	OSBPL10	114884	Homo sapiens	9606	Cisplatin results in decreased expression of OSBPL10 mRNA	decreases^expression	19561079
cisplatin	Cisplatin	D002945	15663-27-1	OSGIN1	29948	Homo sapiens	9606	Cisplatin results in increased expression of OSGIN1 mRNA	increases^expression	19561079
cisplatin	Cisplatin	D002945	15663-27-1	OSR2	116039	Homo sapiens	9606	Cisplatin results in increased expression of OSR2 mRNA	increases^expression	19561079
cisplatin	Cisplatin	D002945	15663-27-1	P2RY11	5032	Homo sapiens	9606	[Adenosine Triphosphate binds to P2RY11 protein] which results in increased susceptibility to Cisplatin	affects^binding|increases^response to substance	21503959
cisplatin	Cisplatin	D002945	15663-27-1	P4HA2	8974	Homo sapiens	9606	P4HA2 protein results in decreased susceptibility to Cisplatin	decreases^response to substance	16734730
cisplatin	Cisplatin	D002945	15663-27-1	P4HB	5034	Homo sapiens	9606	Cisplatin results in decreased expression of P4HB protein	decreases^expression	21924258
cisplatin	Cisplatin	D002945	15663-27-1	PABPC1	26986	Homo sapiens	9606	PABPC1 protein results in increased susceptibility to Cisplatin	increases^response to substance	21466612
cisplatin	Cisplatin	D002945	15663-27-1	PAFAH1B1	5048	Homo sapiens	9606	Cisplatin affects the reaction [Piroxicam results in decreased expression of PAFAH1B1 mRNA]	affects^reaction|decreases^expression	21858171
cisplatin	Cisplatin	D002945	15663-27-1	PAFAH1B3	5050	Homo sapiens	9606	PAFAH1B3 protein results in increased susceptibility to Cisplatin	increases^response to substance	16734730
cisplatin	Cisplatin	D002945	15663-27-1	PAPPA	5069	Homo sapiens	9606	Cisplatin results in decreased expression of PAPPA mRNA	decreases^expression	19561079
cisplatin	Cisplatin	D002945	15663-27-1	PAPPA2	60676	Homo sapiens	9606	PAPPA2 protein affects the susceptibility to Cisplatin	affects^response to substance	16217747
cisplatin	Cisplatin	D002945	15663-27-1	PARD6A	50855	Homo sapiens	9606	Cisplatin results in increased expression of PARD6A protein	increases^expression	16803524
cisplatin	Cisplatin	D002945	15663-27-1	PARN	5073	Homo sapiens	9606	Cisplatin results in decreased expression of PARN mRNA	decreases^expression	19561079
cisplatin	Cisplatin	D002945	15663-27-1	PARP	3355109	Homo sapiens	9606	CD40LG protein inhibits the reaction [Cisplatin promotes the reaction [CASP3 protein results in increased cleavage of PARP protein]]	decreases^reaction|increases^cleavage|increases^reaction	16545138
cisplatin	Cisplatin	D002945	15663-27-1	PARP	3355109	Homo sapiens	9606	Cisplatin promotes the reaction [CASP3 protein results in increased cleavage of PARP protein]	increases^cleavage|increases^reaction	16545138
cisplatin	Cisplatin	D002945	15663-27-1	PARP1	142	Homo sapiens	9606	[3-aminobenzamide results in decreased activity of PARP1 protein] which results in increased susceptibility to Cisplatin	decreases^activity|increases^response to substance	21399878
cisplatin	Cisplatin	D002945	15663-27-1	PARP1	142	Homo sapiens	9606	Acetylcysteine inhibits the reaction [Cisplatin results in increased cleavage of PARP1 protein]	decreases^reaction|increases^cleavage	15496615
cisplatin	Cisplatin	D002945	15663-27-1	PARP1	142	Homo sapiens	9606	AKT1 protein inhibits the reaction [Cisplatin results in increased cleavage of PARP1 protein]	decreases^reaction|increases^cleavage	21266360
cisplatin	Cisplatin	D002945	15663-27-1	PARP1	142	Homo sapiens	9606	BCL2 inhibits the reaction [Cisplatin results in increased cleavage of PARP1 protein]	decreases^reaction|increases^cleavage	21618512
cisplatin	Cisplatin	D002945	15663-27-1	PARP1	142	Homo sapiens	9606	[BIN1 protein results in decreased activity of PARP1 protein] which results in increased susceptibility to Cisplatin	decreases^activity|increases^response to substance	21447800
cisplatin	Cisplatin	D002945	15663-27-1	PARP1	142	Homo sapiens	9606	Cisplatin inhibits the reaction [Zinc binds to PARP1 protein]	affects^binding|decreases^reaction	21370912
cisplatin	Cisplatin	D002945	15663-27-1	PARP1	142	Homo sapiens	9606	Cisplatin promotes the reaction [Platinum binds to PARP1 protein]	affects^binding|increases^reaction	21370912
cisplatin	Cisplatin	D002945	15663-27-1	PARP1	142	Homo sapiens	9606	Cisplatin results in decreased activity of PARP1 protein	decreases^activity	21370912
cisplatin	Cisplatin	D002945	15663-27-1	PARP1	142	Homo sapiens	9606	[Cisplatin results in increased activity of CASP3 protein] which results in increased cleavage of PARP1 protein	increases^activity|increases^cleavage	18176112
cisplatin	Cisplatin	D002945	15663-27-1	PARP1	142	Homo sapiens	9606	Cisplatin results in increased cleavage of PARP1 protein	increases^cleavage	15496615|16009487|18071906|21266360|21370912|21618512|21660965
cisplatin	Cisplatin	D002945	15663-27-1	PARP1	142	Homo sapiens	9606	Cisplatin results in increased expression of PARP1 protein	increases^expression	21274007
cisplatin	Cisplatin	D002945	15663-27-1	PARP1	142	Homo sapiens	9606	CITED2 mutant form promotes the reaction [Cisplatin results in increased cleavage of PARP1 protein]	increases^cleavage|increases^reaction	21660965
cisplatin	Cisplatin	D002945	15663-27-1	PARP1	142	Homo sapiens	9606	[CITED2 results in decreased susceptibility to Cisplatin] which results in decreased cleavage of PARP1 protein	decreases^cleavage|decreases^response to substance	21660965
cisplatin	Cisplatin	D002945	15663-27-1	PARP1	142	Homo sapiens	9606	PARP1 protein results in decreased susceptibility to Cisplatin	decreases^response to substance	21447800
cisplatin	Cisplatin	D002945	15663-27-1	PARP2	10038	Homo sapiens	9606	Cisplatin results in increased expression of PARP2 protein	increases^expression	21274007
cisplatin	Cisplatin	D002945	15663-27-1	PAX8	7849	Homo sapiens	9606	PAX8 protein affects the susceptibility to Cisplatin	affects^response to substance	16217747
cisplatin	Cisplatin	D002945	15663-27-1	PBK	55872	Homo sapiens	9606	Cisplatin promotes the reaction [Piroxicam results in decreased expression of PBK mRNA]	decreases^expression|increases^reaction	21858171
cisplatin	Cisplatin	D002945	15663-27-1	PBX1	5087	Homo sapiens	9606	PBX1 protein affects the susceptibility to Cisplatin	affects^response to substance	16217747
cisplatin	Cisplatin	D002945	15663-27-1	PBX2	5089	Homo sapiens	9606	[Cisplatin co-treated with panobinostat] affects the expression of PBX2 mRNA	affects^cotreatment|affects^expression	21791302
cisplatin	Cisplatin	D002945	15663-27-1	PCDH7	5099	Homo sapiens	9606	Cisplatin results in decreased expression of PCDH7 mRNA	decreases^expression	21603599
cisplatin	Cisplatin	D002945	15663-27-1	PCNA	5111	Homo sapiens	9606	Cisplatin results in decreased expression of PCNA protein	decreases^expression	16803524
cisplatin	Cisplatin	D002945	15663-27-1	PCNA	5111	Homo sapiens	9606	Cisplatin results in increased expression of PCNA mRNA	increases^expression	11099651|21532991
cisplatin	Cisplatin	D002945	15663-27-1	PCNA	5111	Homo sapiens	9606	PCNA mRNA affects the reaction [DPYD mRNA affects the susceptibility to Cisplatin]	affects^reaction|affects^response to substance	16685392
cisplatin	Cisplatin	D002945	15663-27-1	PCNA	5111	Homo sapiens	9606	PCNA mRNA affects the reaction [TYMS mRNA affects the susceptibility to Cisplatin]	affects^reaction|affects^response to substance	16685392
cisplatin	Cisplatin	D002945	15663-27-1	PDCD1LG2	80380	Homo sapiens	9606	Cisplatin inhibits the reaction [[TNF co-treated with IL4] results in increased expression of PDCD1LG2]	affects^cotreatment|decreases^reaction|increases^expression	21765211
cisplatin	Cisplatin	D002945	15663-27-1	PDCD1LG2	80380	Homo sapiens	9606	Cisplatin inhibits the reaction [[TNF co-treated with Lipopolysaccharides] results in increased expression of PDCD1LG2]	affects^cotreatment|decreases^reaction|increases^expression	21765211
cisplatin	Cisplatin	D002945	15663-27-1	PDCD1LG2	80380	Homo sapiens	9606	Cisplatin results in decreased expression of PDCD1LG2	decreases^expression	21765211
cisplatin	Cisplatin	D002945	15663-27-1	PDCD5	9141	Homo sapiens	9606	PDCD5 protein results in increased susceptibility to Cisplatin	increases^response to substance	20869960
cisplatin	Cisplatin	D002945	15663-27-1	PDE4C	5143	Homo sapiens	9606	[Cisplatin co-treated with panobinostat] affects the expression of PDE4C mRNA	affects^cotreatment|affects^expression	21791302
cisplatin	Cisplatin	D002945	15663-27-1	PDIA3	2923	Homo sapiens	9606	PDIA3 affects the susceptibility to Cisplatin	affects^response to substance	15756446
cisplatin	Cisplatin	D002945	15663-27-1	PDIA4	9601	Homo sapiens	9606	Cisplatin results in decreased expression of PDIA4 mRNA	decreases^expression	11099651
cisplatin	Cisplatin	D002945	15663-27-1	PDSS1	23590	Homo sapiens	9606	Cisplatin promotes the reaction [Piroxicam results in decreased expression of PDSS1 mRNA]	decreases^expression|increases^reaction	21858171
cisplatin	Cisplatin	D002945	15663-27-1	PDSS2	57107	Homo sapiens	9606	Cisplatin results in decreased expression of PDSS2 mRNA	decreases^expression	19561079
cisplatin	Cisplatin	D002945	15663-27-1	PDXK	8566	Homo sapiens	9606	PDXK protein affects the susceptibility to Cisplatin	affects^response to substance	16217747
cisplatin	Cisplatin	D002945	15663-27-1	PEAK1	79834	Homo sapiens	9606	Cisplatin results in decreased expression of PEAK1 mRNA	decreases^expression	19561079
cisplatin	Cisplatin	D002945	15663-27-1	PFDN5	5204	Homo sapiens	9606	Folic Acid affects the reaction [Cisplatin affects the expression of PFDN5 mRNA]	affects^expression|affects^reaction	16898872
cisplatin	Cisplatin	D002945	15663-27-1	PFKFB4	5210	Homo sapiens	9606	Cisplatin results in increased expression of PFKFB4 protein	increases^expression	16803524
cisplatin	Cisplatin	D002945	15663-27-1	PFKP	5214	Homo sapiens	9606	PFKP protein affects the susceptibility to Cisplatin	affects^response to substance	16217747
cisplatin	Cisplatin	D002945	15663-27-1	PGK1	5230	Homo sapiens	9606	PGK1 affects the susceptibility to Cisplatin	affects^response to substance	15756446
cisplatin	Cisplatin	D002945	15663-27-1	PGRMC2	10424	Homo sapiens	9606	Cisplatin affects the reaction [Piroxicam results in decreased expression of PGRMC2 mRNA]	affects^reaction|decreases^expression	21858171
cisplatin	Cisplatin	D002945	15663-27-1	PHGDH	26227	Homo sapiens	9606	Cisplatin promotes the reaction [Piroxicam results in decreased expression of PHGDH mRNA]	decreases^expression|increases^reaction	21858171
cisplatin	Cisplatin	D002945	15663-27-1	PHIP	55023	Homo sapiens	9606	PHIP protein affects the susceptibility to Cisplatin	affects^response to substance	16217747
cisplatin	Cisplatin	D002945	15663-27-1	PHLDA1	22822	Homo sapiens	9606	Cisplatin results in decreased expression of PHLDA1 mRNA	decreases^expression	19561079
cisplatin	Cisplatin	D002945	15663-27-1	PHLDA1	22822	Homo sapiens	9606	Cisplatin results in increased expression of PHLDA1 mRNA	increases^expression	21603599
cisplatin	Cisplatin	D002945	15663-27-1	PHLDA1	22822	Homo sapiens	9606	PHLDA1 protein affects the susceptibility to Cisplatin	affects^response to substance	16217747
cisplatin	Cisplatin	D002945	15663-27-1	PHLDA2	7262	Homo sapiens	9606	Cisplatin affects the reaction [Piroxicam results in decreased expression of PHLDA2 mRNA]	affects^reaction|decreases^expression	21858171
cisplatin	Cisplatin	D002945	15663-27-1	PHLDA2	7262	Homo sapiens	9606	PHLDA2 results in increased susceptibility to Cisplatin	increases^response to substance	22021909
cisplatin	Cisplatin	D002945	15663-27-1	PI4KA	5297	Homo sapiens	9606	PI4KA results in decreased susceptibility to Cisplatin	decreases^response to substance	21652733
cisplatin	Cisplatin	D002945	15663-27-1	PIGA	5277	Homo sapiens	9606	[Cisplatin co-treated with Etoposide] results in increased mutagenesis of PIGA	affects^cotreatment|increases^mutagenesis	21826740
cisplatin	Cisplatin	D002945	15663-27-1	PIK3C2B	5287	Homo sapiens	9606	PIK3C2B results in decreased susceptibility to Cisplatin	decreases^response to substance	21986133
cisplatin	Cisplatin	D002945	15663-27-1	PIK3CA	5290	Homo sapiens	9606	PIK3CA results in decreased susceptibility to Cisplatin	decreases^response to substance	21849418
cisplatin	Cisplatin	D002945	15663-27-1	PIK3CG	5294	Homo sapiens	9606	PIK3CG results in decreased susceptibility to Cisplatin	decreases^response to substance	21652733
cisplatin	Cisplatin	D002945	15663-27-1	PIK3R1	5295	Homo sapiens	9606	PIK3R1 results in decreased susceptibility to Cisplatin	decreases^response to substance	21571862
cisplatin	Cisplatin	D002945	15663-27-1	PINK1	65018	Homo sapiens	9606	[Piroxicam co-treated with Cisplatin] results in increased expression of PINK1 mRNA	affects^cotreatment|increases^expression	21858171
cisplatin	Cisplatin	D002945	15663-27-1	PLIN2	123	Homo sapiens	9606	PLIN2 protein affects the susceptibility to Cisplatin	affects^response to substance	16217747
cisplatin	Cisplatin	D002945	15663-27-1	PLIN3	10226	Homo sapiens	9606	PLIN3 protein affects the susceptibility to Cisplatin	affects^response to substance	16217747
cisplatin	Cisplatin	D002945	15663-27-1	PLK1	5347	Homo sapiens	9606	Cisplatin results in increased localization of PLK1 protein	increases^localization	20655883
cisplatin	Cisplatin	D002945	15663-27-1	PLK1	5347	Homo sapiens	9606	Cisplatin results in increased localization of [PLK1 protein co-treated with TP73 protein]	affects^cotreatment|increases^localization	20655883
cisplatin	Cisplatin	D002945	15663-27-1	PLK1	5347	Homo sapiens	9606	PLK1 protein inhibits the reaction [Cisplatin results in increased activity of CASP3 protein]	decreases^reaction|increases^activity	20655883
cisplatin	Cisplatin	D002945	15663-27-1	PLK1	5347	Homo sapiens	9606	PLK1 protein inhibits the reaction [Cisplatin results in increased expression of BAX mRNA]	decreases^reaction|increases^expression	20655883
cisplatin	Cisplatin	D002945	15663-27-1	PLK1	5347	Homo sapiens	9606	PLK1 protein inhibits the reaction [Cisplatin results in increased expression of GADD45A mRNA]	decreases^reaction|increases^expression	20655883
cisplatin	Cisplatin	D002945	15663-27-1	PLK1	5347	Homo sapiens	9606	PLK1 protein inhibits the reaction [Cisplatin results in increased expression of TP73 protein]	decreases^reaction|increases^expression	20655883
cisplatin	Cisplatin	D002945	15663-27-1	PLK1	5347	Homo sapiens	9606	PLK1 protein results in decreased susceptibility to Cisplatin	decreases^response to substance	20655883
cisplatin	Cisplatin	D002945	15663-27-1	PLK1	5347	Homo sapiens	9606	PLK1 results in decreased susceptibility to Cisplatin	decreases^response to substance	22000864
cisplatin	Cisplatin	D002945	15663-27-1	PLK2	10769	Homo sapiens	9606	Cisplatin results in increased expression of PLK2 mRNA	increases^expression	21532991
cisplatin	Cisplatin	D002945	15663-27-1	PLK3	1263	Homo sapiens	9606	Cisplatin results in increased expression of PLK3 mRNA	increases^expression	21532991
cisplatin	Cisplatin	D002945	15663-27-1	PLK4	10733	Homo sapiens	9606	Cisplatin promotes the reaction [Piroxicam results in decreased expression of PLK4 mRNA]	decreases^expression|increases^reaction	21858171
cisplatin	Cisplatin	D002945	15663-27-1	PLP2	5355	Homo sapiens	9606	PLP2 protein affects the susceptibility to Cisplatin	affects^response to substance	16217747
cisplatin	Cisplatin	D002945	15663-27-1	PLS1	5357	Homo sapiens	9606	Cisplatin promotes the reaction [Piroxicam results in decreased expression of PLS1 mRNA]	decreases^expression|increases^reaction	21858171
cisplatin	Cisplatin	D002945	15663-27-1	PLXNB2	23654	Homo sapiens	9606	[Piroxicam co-treated with Cisplatin] results in increased expression of PLXNB2 mRNA	affects^cotreatment|increases^expression	21858171
cisplatin	Cisplatin	D002945	15663-27-1	PMAIP1	5366	Homo sapiens	9606	[2,2-bis(hydroxymethyl)-1-azabicyclo(2,2,2,)octan-3-one co-treated with Cisplatin] results in increased expression of PMAIP1 mRNA	affects^cotreatment|increases^expression	21109480
cisplatin	Cisplatin	D002945	15663-27-1	PMAIP1	5366	Homo sapiens	9606	[[Cisplatin co-treated with 2,5,7,8-tetramethyl-2R-(4R,8R,12-trimethyltridecyl)chroman-6-yloxy acetic acid] results in increased expression of TP73 protein] which results in increased expression of PMAIP1 mRNA	affects^cotreatment|increases^expression	21214929
cisplatin	Cisplatin	D002945	15663-27-1	PMAIP1	5366	Homo sapiens	9606	[[Cisplatin co-treated with 2,5,7,8-tetramethyl-2R-(4R,8R,12-trimethyltridecyl)chroman-6-yloxy acetic acid] results in increased expression of TP73 protein] which results in increased expression of PMAIP1 protein	affects^cotreatment|increases^expression	21214929
cisplatin	Cisplatin	D002945	15663-27-1	PMAIP1	5366	Homo sapiens	9606	[[[Cisplatin co-treated with 2,5,7,8-tetramethyl-2R-(4R,8R,12-trimethyltridecyl)chroman-6-yloxy acetic acid] results in increased phosphorylation of ABL1 protein] which results in increased expression of TP73 protein] which results in increased expression of PMAIP1 protein	affects^cotreatment|increases^expression|increases^phosphorylation	21214929
cisplatin	Cisplatin	D002945	15663-27-1	PMAIP1	5366	Homo sapiens	9606	Cisplatin promotes the reaction [RELA protein binds to PMAIP1 promoter]	affects^binding|increases^reaction	21737676
cisplatin	Cisplatin	D002945	15663-27-1	PMAIP1	5366	Homo sapiens	9606	Cisplatin promotes the reaction [RELA protein mutant form binds to PMAIP1 promoter]	affects^binding|increases^reaction	21737676
cisplatin	Cisplatin	D002945	15663-27-1	PMAIP1	5366	Homo sapiens	9606	Cisplatin promotes the reaction [TP53 protein results in increased expression of PMAIP1 mRNA]	increases^expression|increases^reaction	21532991
cisplatin	Cisplatin	D002945	15663-27-1	PMAIP1	5366	Homo sapiens	9606	Cisplatin results in increased expression of PMAIP1 mRNA	increases^expression	19561079|21532991|21603599|21737676
cisplatin	Cisplatin	D002945	15663-27-1	PMAIP1	5366	Homo sapiens	9606	Cisplatin results in increased expression of PMAIP1 protein	increases^expression	18176112|20802529|21516125
cisplatin	Cisplatin	D002945	15663-27-1	PMAIP1	5366	Homo sapiens	9606	[nutlin 3 co-treated with Cisplatin] results in increased expression of PMAIP1 mRNA	affects^cotreatment|increases^expression	21109480
cisplatin	Cisplatin	D002945	15663-27-1	PMAIP1	5366	Homo sapiens	9606	PD 98059 inhibits the reaction [Cisplatin results in increased expression of PMAIP1 protein]	decreases^reaction|increases^expression	20802529
cisplatin	Cisplatin	D002945	15663-27-1	PMAIP1	5366	Homo sapiens	9606	PMAIP1 protein results in increased susceptibility to Cisplatin	increases^response to substance	20802529|21532991
cisplatin	Cisplatin	D002945	15663-27-1	PMAIP1	5366	Homo sapiens	9606	RELA promotes the reaction [Cisplatin results in increased expression of PMAIP1 mRNA]	increases^expression|increases^reaction	21737676
cisplatin	Cisplatin	D002945	15663-27-1	PMAIP1	5366	Homo sapiens	9606	[[Sirolimus co-treated with Cisplatin] results in increased expression of TP73 protein] which results in increased expression of PMAIP1 protein	affects^cotreatment|increases^expression	20686837
cisplatin	Cisplatin	D002945	15663-27-1	PMAIP1	5366	Homo sapiens	9606	TP53 protein promotes the reaction [Cisplatin results in increased expression of PMAIP1 mRNA]	increases^expression|increases^reaction	17216584
cisplatin	Cisplatin	D002945	15663-27-1	PMAIP1	5366	Homo sapiens	9606	TP73 mutant form inhibits the reaction [RELA promotes the reaction [Cisplatin results in increased expression of PMAIP1 mRNA]]	decreases^reaction|increases^expression|increases^reaction	21737676
cisplatin	Cisplatin	D002945	15663-27-1	PMAIP1	5366	Homo sapiens	9606	TP73 protein modified form promotes the reaction [Cisplatin results in increased expression of PMAIP1 protein]	increases^expression|increases^reaction	21516125
cisplatin	Cisplatin	D002945	15663-27-1	PMAIP1	5366	Homo sapiens	9606	Tretinoin inhibits the reaction [Cisplatin results in increased expression of PMAIP1 mRNA]	decreases^reaction|increases^expression	21532991
cisplatin	Cisplatin	D002945	15663-27-1	PMAIP1	5366	Homo sapiens	9606	Tretinoin inhibits the reaction [Cisplatin results in increased expression of PMAIP1 protein]	decreases^reaction|increases^expression	21532991
cisplatin	Cisplatin	D002945	15663-27-1	PMAIP1	5366	Homo sapiens	9606	[YAP1 protein promotes the reaction [[Cisplatin co-treated with 2,5,7,8-tetramethyl-2R-(4R,8R,12-trimethyltridecyl)chroman-6-yloxy acetic acid] results in increased expression of TP73 protein]] which results in increased expression of PMAIP1 protein	affects^cotreatment|increases^expression|increases^reaction	21214929
cisplatin	Cisplatin	D002945	15663-27-1	PMPCA	23203	Homo sapiens	9606	Cisplatin results in decreased expression of PMPCA protein	decreases^expression	16803524
cisplatin	Cisplatin	D002945	15663-27-1	PMS2	5395	Homo sapiens	9606	Cisplatin affects the localization of PMS2 protein	affects^localization	21064154
cisplatin	Cisplatin	D002945	15663-27-1	PNMT	5409	Homo sapiens	9606	[Cisplatin co-treated with panobinostat] affects the expression of PNMT mRNA	affects^cotreatment|affects^expression	21791302
cisplatin	Cisplatin	D002945	15663-27-1	PNN	5411	Homo sapiens	9606	Cisplatin affects the reaction [Piroxicam results in decreased expression of PNN mRNA]	affects^reaction|decreases^expression	21858171
cisplatin	Cisplatin	D002945	15663-27-1	POLA1	5422	Homo sapiens	9606	POLA1 protein results in increased susceptibility to Cisplatin	increases^response to substance	16734730
cisplatin	Cisplatin	D002945	15663-27-1	POLE2	5427	Homo sapiens	9606	Cisplatin inhibits the reaction [Piroxicam results in increased expression of POLE2 mRNA]	decreases^reaction|increases^expression	21858171
cisplatin	Cisplatin	D002945	15663-27-1	POLR3E	55718	Homo sapiens	9606	[Cisplatin co-treated with panobinostat] affects the expression of POLR3E mRNA	affects^cotreatment|affects^expression	21791302
cisplatin	Cisplatin	D002945	15663-27-1	POP4	10775	Homo sapiens	9606	POP4 protein affects the susceptibility to Cisplatin	affects^response to substance	16217747
cisplatin	Cisplatin	D002945	15663-27-1	POU5F1	5460	Homo sapiens	9606	[Cisplatin results in decreased susceptibility to Cisplatin] which results in increased expression of POU5F1 mRNA	decreases^response to substance|increases^expression	21342274
cisplatin	Cisplatin	D002945	15663-27-1	POU5F1	5460	Homo sapiens	9606	[Cisplatin results in decreased susceptibility to Cisplatin] which results in increased expression of POU5F1 protein	decreases^response to substance|increases^expression	21342274
cisplatin	Cisplatin	D002945	15663-27-1	POU5F1	5460	Homo sapiens	9606	Cisplatin results in increased expression of POU5F1 mRNA	increases^expression	21618587
cisplatin	Cisplatin	D002945	15663-27-1	POU5F1	5460	Homo sapiens	9606	Cisplatin results in increased expression of POU5F1 protein	increases^expression	20074550|21618587
cisplatin	Cisplatin	D002945	15663-27-1	PPARG	5468	Homo sapiens	9606	[rosiglitazone binds to and results in increased activity of PPARG protein] which results in decreased susceptibility to Cisplatin	affects^binding|decreases^response to substance|increases^activity	21781307
cisplatin	Cisplatin	D002945	15663-27-1	PPARG	5468	Homo sapiens	9606	[rosiglitazone binds to and results in increased activity of PPARG protein] which results in increased susceptibility to Cisplatin	affects^binding|increases^activity|increases^response to substance	21781307
cisplatin	Cisplatin	D002945	15663-27-1	PPIA	5478	Homo sapiens	9606	[BSG binds to PPIA] which results in decreased susceptibility to Cisplatin	affects^binding|decreases^response to substance	21956400
cisplatin	Cisplatin	D002945	15663-27-1	PPIA	5478	Homo sapiens	9606	[[BSG binds to PPIA] which results in decreased susceptibility to Cisplatin] which results in increased expression of MMP9	affects^binding|decreases^response to substance|increases^expression	21956400
cisplatin	Cisplatin	D002945	15663-27-1	PPIA	5478	Homo sapiens	9606	Cisplatin results in increased expression of PPIA protein	increases^expression	21924258
cisplatin	Cisplatin	D002945	15663-27-1	PPIE	10450	Homo sapiens	9606	Cisplatin results in increased expression of PPIE protein	increases^expression	16803524
cisplatin	Cisplatin	D002945	15663-27-1	PPIF	10105	Homo sapiens	9606	Cisplatin results in increased expression of PPIF mRNA	increases^expression	19561079
cisplatin	Cisplatin	D002945	15663-27-1	PPM1A	5494	Homo sapiens	9606	[PPM1A results in decreased phosphorylation of BAD protein] which results in increased susceptibility to Cisplatin	decreases^phosphorylation|increases^response to substance	21849418
cisplatin	Cisplatin	D002945	15663-27-1	PPM1A	5494	Homo sapiens	9606	PPM1A results in decreased susceptibility to Cisplatin	decreases^response to substance	21849418
cisplatin	Cisplatin	D002945	15663-27-1	PPM1B	5495	Homo sapiens	9606	[Piroxicam co-treated with Cisplatin] results in increased expression of PPM1B mRNA	affects^cotreatment|increases^expression	21858171
cisplatin	Cisplatin	D002945	15663-27-1	PPM1D	8493	Homo sapiens	9606	Cisplatin results in increased expression of PPM1D mRNA	increases^expression	21532991
cisplatin	Cisplatin	D002945	15663-27-1	PPP1R15A	23645	Homo sapiens	9606	Cisplatin inhibits the reaction [Piroxicam results in decreased expression of PPP1R15A mRNA]	decreases^expression|decreases^reaction	21858171
cisplatin	Cisplatin	D002945	15663-27-1	PPP1R17	10842	Homo sapiens	9606	Cisplatin results in increased expression of PPP1R17 protein	increases^expression	16803524
cisplatin	Cisplatin	D002945	15663-27-1	PPP1R1B	84152	Homo sapiens	9606	PPP1R1B protein results in increased susceptibility to Cisplatin	increases^response to substance	17470401
cisplatin	Cisplatin	D002945	15663-27-1	PPP3CA	5530	Homo sapiens	9606	[Piroxicam co-treated with Cisplatin] results in decreased expression of PPP3CA mRNA	affects^cotreatment|decreases^expression	21858171
cisplatin	Cisplatin	D002945	15663-27-1	PPP3CB	5532	Homo sapiens	9606	Cisplatin results in decreased expression of PPP3CB protein	decreases^expression	16803524
cisplatin	Cisplatin	D002945	15663-27-1	PRDM1	639	Homo sapiens	9606	Cisplatin results in increased expression of PRDM1 mRNA	increases^expression	21532991
cisplatin	Cisplatin	D002945	15663-27-1	PRDM7	11105	Homo sapiens	9606	PRDM7 results in increased susceptibility to Cisplatin	increases^response to substance	21755009
cisplatin	Cisplatin	D002945	15663-27-1	PRDX6	9588	Homo sapiens	9606	PRDX6 protein inhibits the reaction [Cisplatin results in increased abundance of Reactive Oxygen Species]	decreases^reaction|increases^abundance	21166495
cisplatin	Cisplatin	D002945	15663-27-1	PRDX6	9588	Homo sapiens	9606	PRDX6 protein inhibits the reaction [Cisplatin results in increased activity of CASP3 protein]	decreases^reaction|increases^activity	21166495
cisplatin	Cisplatin	D002945	15663-27-1	PRDX6	9588	Homo sapiens	9606	PRDX6 protein inhibits the reaction [Cisplatin results in increased activity of CASP9 protein]	decreases^reaction|increases^activity	21166495
cisplatin	Cisplatin	D002945	15663-27-1	PRICKLE1	144165	Homo sapiens	9606	Cisplatin results in decreased expression of PRICKLE1 mRNA	decreases^expression	19561079
cisplatin	Cisplatin	D002945	15663-27-1	PRIM2	5558	Homo sapiens	9606	Cisplatin results in decreased expression of PRIM2 mRNA	decreases^expression	19561079
cisplatin	Cisplatin	D002945	15663-27-1	PRKAA1	5562	Homo sapiens	9606	Cisplatin results in increased expression of PRKAA1 mRNA	increases^expression	19561079
cisplatin	Cisplatin	D002945	15663-27-1	PRKAB1	5564	Homo sapiens	9606	Cisplatin results in increased expression of PRKAB1 mRNA	increases^expression	21532991
cisplatin	Cisplatin	D002945	15663-27-1	PRKACA	5566	Homo sapiens	9606	[PRKACA results in increased phosphorylation of BAD protein] which results in decreased susceptibility to Cisplatin	decreases^response to substance|increases^phosphorylation	21849418
cisplatin	Cisplatin	D002945	15663-27-1	PRKCA	5578	Homo sapiens	9606	Cisplatin results in decreased expression of PRKCA mRNA	decreases^expression	19561079
cisplatin	Cisplatin	D002945	15663-27-1	PRKCA	5578	Homo sapiens	9606	[PRKCA protein results in increased phosphorylation of GSTP1 protein] which results in increased metabolism of Cisplatin	increases^metabolic processing|increases^phosphorylation	20654585
cisplatin	Cisplatin	D002945	15663-27-1	PRKCA	5578	Homo sapiens	9606	[[PRKCA protein results in increased phosphorylation of GSTP1 protein] which results in increased metabolism of Cisplatin] which results in decreased susceptibility to Cisplatin	decreases^response to substance|increases^metabolic processing|increases^phosphorylation	20654585
cisplatin	Cisplatin	D002945	15663-27-1	PRKCI	5584	Homo sapiens	9606	PRKCI protein affects the susceptibility to Cisplatin	affects^response to substance	16217747
cisplatin	Cisplatin	D002945	15663-27-1	PRKDC	5591	Homo sapiens	9606	PRKDC mRNA results in increased susceptibility to [Fluorouracil co-treated with Cisplatin]	affects^cotreatment|increases^response to substance	18546291
cisplatin	Cisplatin	D002945	15663-27-1	PRL	5617	Homo sapiens	9606	Cisplatin results in increased expression of PRL protein	increases^expression	8312290
cisplatin	Cisplatin	D002945	15663-27-1	PRNP	5621	Homo sapiens	9606	PRNP protein results in decreased susceptibility to Cisplatin	decreases^response to substance	15386405
cisplatin	Cisplatin	D002945	15663-27-1	PROC	5624	Homo sapiens	9606	Cisplatin results in decreased expression of PROC protein	decreases^expression	10475134
cisplatin	Cisplatin	D002945	15663-27-1	PRODH	5625	Homo sapiens	9606	PRODH protein affects the susceptibility to Cisplatin	affects^response to substance	16217747
cisplatin	Cisplatin	D002945	15663-27-1	PROM1	8842	Homo sapiens	9606	[Cisplatin results in decreased susceptibility to Cisplatin] which results in increased expression of PROM1 protein	decreases^response to substance|increases^expression	21342274
cisplatin	Cisplatin	D002945	15663-27-1	PROM1	8842	Homo sapiens	9606	Cisplatin results in increased expression of PROM1 protein	increases^expression	21618587
cisplatin	Cisplatin	D002945	15663-27-1	PROM1	8842	Homo sapiens	9606	PROM1 results in decreased susceptibility to Cisplatin	decreases^response to substance	21919130
cisplatin	Cisplatin	D002945	15663-27-1	PROS1	5627	Homo sapiens	9606	PROS1 protein affects the susceptibility to Cisplatin	affects^response to substance	16217747
cisplatin	Cisplatin	D002945	15663-27-1	PSAP	5660	Homo sapiens	9606	Cisplatin affects the reaction [Piroxicam results in decreased expression of PSAP mRNA]	affects^reaction|decreases^expression	21858171
cisplatin	Cisplatin	D002945	15663-27-1	PSD3	23362	Homo sapiens	9606	Cisplatin results in decreased expression of PSD3 mRNA	decreases^expression	19561079
cisplatin	Cisplatin	D002945	15663-27-1	PSMA2	5683	Homo sapiens	9606	Cisplatin promotes the reaction [Piroxicam results in decreased expression of PSMA2 mRNA]	decreases^expression|increases^reaction	21858171
cisplatin	Cisplatin	D002945	15663-27-1	PSMB10	5699	Homo sapiens	9606	PSMB10 protein results in decreased susceptibility to Cisplatin	decreases^response to substance	16734730
cisplatin	Cisplatin	D002945	15663-27-1	PSMD12	5718	Homo sapiens	9606	Cisplatin affects the reaction [Piroxicam results in decreased expression of PSMD12 mRNA]	affects^reaction|decreases^expression	21858171
cisplatin	Cisplatin	D002945	15663-27-1	PTEN	5728	Homo sapiens	9606	Cisplatin results in increased activity of PTEN protein	increases^activity	11707646
cisplatin	Cisplatin	D002945	15663-27-1	PTEN	5728	Homo sapiens	9606	PTEN results in increased susceptibility to Cisplatin	increases^response to substance	21116717
cisplatin	Cisplatin	D002945	15663-27-1	PTGER3	5733	Homo sapiens	9606	[Cisplatin co-treated with ciglitazone] results in decreased expression of PTGER3	affects^cotreatment|decreases^expression	21681689
cisplatin	Cisplatin	D002945	15663-27-1	PTGES	9536	Homo sapiens	9606	[Cisplatin co-treated with ciglitazone] results in decreased expression of PTGES	affects^cotreatment|decreases^expression	21681689
cisplatin	Cisplatin	D002945	15663-27-1	PTGES	9536	Homo sapiens	9606	Cisplatin results in increased expression of PTGES protein	increases^expression	20844471
cisplatin	Cisplatin	D002945	15663-27-1	PTGS1	5742	Homo sapiens	9606	PTGS1 protein affects the susceptibility to Cisplatin	affects^response to substance	16217747
cisplatin	Cisplatin	D002945	15663-27-1	PTGS2	5743	Homo sapiens	9606	[Cisplatin co-treated with ciglitazone] results in decreased expression of PTGS2	affects^cotreatment|decreases^expression	21681689
cisplatin	Cisplatin	D002945	15663-27-1	PTGS2	5743	Homo sapiens	9606	[Cisplatin co-treated with Fluorouracil] affects the expression of PTGS2 protein	affects^cotreatment|affects^expression	16322294
cisplatin	Cisplatin	D002945	15663-27-1	PTGS2	5743	Homo sapiens	9606	Cisplatin results in increased expression of PTGS2 mRNA	increases^expression	15846114
cisplatin	Cisplatin	D002945	15663-27-1	PTGS2	5743	Homo sapiens	9606	Cisplatin results in increased expression of PTGS2 protein	increases^expression	20844471
cisplatin	Cisplatin	D002945	15663-27-1	PTGS2	5743	Homo sapiens	9606	[PTGS2 protein results in increased expression of ABCC1 protein] which results in increased susceptibility to Cisplatin	increases^expression|increases^response to substance	18695918
cisplatin	Cisplatin	D002945	15663-27-1	PTGS2	5743	Homo sapiens	9606	[PTGS2 protein results in increased expression of ABCC2 protein] which results in increased susceptibility to Cisplatin	increases^expression|increases^response to substance	18695918
cisplatin	Cisplatin	D002945	15663-27-1	PTGS2	5743	Homo sapiens	9606	PTGS2 results in decreased susceptibility to Cisplatin	decreases^response to substance	15517878
cisplatin	Cisplatin	D002945	15663-27-1	PTK2	5747	Homo sapiens	9606	Cisplatin results in decreased expression of PTK2 mRNA	decreases^expression	19561079|21532991
cisplatin	Cisplatin	D002945	15663-27-1	PTK2	5747	Homo sapiens	9606	Cisplatin results in decreased expression of PTK2 protein	decreases^expression	16391810
cisplatin	Cisplatin	D002945	15663-27-1	PTP4A1	7803	Homo sapiens	9606	[Piroxicam co-treated with Cisplatin] results in decreased expression of PTP4A1 mRNA	affects^cotreatment|decreases^expression	21858171
cisplatin	Cisplatin	D002945	15663-27-1	PTP4A2	8073	Homo sapiens	9606	Cisplatin affects the reaction [Piroxicam results in decreased expression of PTP4A2 mRNA]	affects^reaction|decreases^expression	21858171
cisplatin	Cisplatin	D002945	15663-27-1	PTPN14	5784	Homo sapiens	9606	Cisplatin results in decreased expression of PTPN14 mRNA	decreases^expression	21603599
cisplatin	Cisplatin	D002945	15663-27-1	PTPRF	5792	Homo sapiens	9606	[Cisplatin co-treated with panobinostat] affects the expression of PTPRF mRNA	affects^cotreatment|affects^expression	21791302
cisplatin	Cisplatin	D002945	15663-27-1	PTPRK	5796	Homo sapiens	9606	Cisplatin results in decreased expression of PTPRK mRNA	decreases^expression	19561079
cisplatin	Cisplatin	D002945	15663-27-1	PTX3	5806	Homo sapiens	9606	[Piroxicam co-treated with Cisplatin] results in decreased expression of PTX3 mRNA	affects^cotreatment|decreases^expression	21858171
cisplatin	Cisplatin	D002945	15663-27-1	PUF60	22827	Homo sapiens	9606	PUF60 protein results in increased susceptibility to Cisplatin	increases^response to substance	21435101
cisplatin	Cisplatin	D002945	15663-27-1	PUS3	83480	Homo sapiens	9606	Cisplatin results in increased expression of PUS3 mRNA	increases^expression	19561079
cisplatin	Cisplatin	D002945	15663-27-1	PXDN	7837	Homo sapiens	9606	PXDN protein affects the susceptibility to Cisplatin	affects^response to substance	16217747
cisplatin	Cisplatin	D002945	15663-27-1	QSOX1	5768	Homo sapiens	9606	QSOX1 protein results in decreased susceptibility to Cisplatin	decreases^response to substance	16734730
cisplatin	Cisplatin	D002945	15663-27-1	RAB28	9364	Homo sapiens	9606	Cisplatin results in decreased expression of RAB28 mRNA	decreases^expression	21603599
cisplatin	Cisplatin	D002945	15663-27-1	RAB2A	5862	Homo sapiens	9606	[Piroxicam co-treated with Cisplatin] results in decreased expression of RAB2A mRNA	affects^cotreatment|decreases^expression	21858171
cisplatin	Cisplatin	D002945	15663-27-1	RAB40B	10966	Homo sapiens	9606	RAB40B protein affects the susceptibility to Cisplatin	affects^response to substance	16217747
cisplatin	Cisplatin	D002945	15663-27-1	RAB7A	7879	Homo sapiens	9606	[Piroxicam co-treated with Cisplatin] results in decreased expression of RAB7A mRNA	affects^cotreatment|decreases^expression	21858171
cisplatin	Cisplatin	D002945	15663-27-1	RAB8A	4218	Homo sapiens	9606	RAB8A results in decreased susceptibility to Cisplatin	decreases^response to substance	21969054
cisplatin	Cisplatin	D002945	15663-27-1	RAB8A	4218	Homo sapiens	9606	TMEM205 promotes the reaction [RAB8A results in decreased susceptibility to Cisplatin]	decreases^response to substance|increases^reaction	21969054
cisplatin	Cisplatin	D002945	15663-27-1	RABEP1	9135	Homo sapiens	9606	[Piroxicam co-treated with Cisplatin] results in increased expression of RABEP1 mRNA	affects^cotreatment|increases^expression	21858171
cisplatin	Cisplatin	D002945	15663-27-1	RACGAP1	29127	Homo sapiens	9606	Cisplatin inhibits the reaction [Piroxicam results in increased expression of RACGAP1 mRNA]	decreases^reaction|increases^expression	21858171
cisplatin	Cisplatin	D002945	15663-27-1	RAD21	5885	Homo sapiens	9606	RAD21 protein affects the susceptibility to Cisplatin	affects^response to substance	16217747
cisplatin	Cisplatin	D002945	15663-27-1	RAD23A	5886	Homo sapiens	9606	Cisplatin results in increased expression of RAD23A protein	increases^expression	21742020
cisplatin	Cisplatin	D002945	15663-27-1	RAD23A	5886	Homo sapiens	9606	RAD23A results in decreased susceptibility to Cisplatin	decreases^response to substance	21742020
cisplatin	Cisplatin	D002945	15663-27-1	RAD23B	5887	Homo sapiens	9606	2-(4-morpholinyl)-8-phenyl-4H-1-benzopyran-4-one inhibits the reaction [Cisplatin results in increased expression of RAD23B protein]	decreases^reaction|increases^expression	21742020
cisplatin	Cisplatin	D002945	15663-27-1	RAD23B	5887	Homo sapiens	9606	Cisplatin results in increased expression of RAD23B protein	increases^expression	21742020
cisplatin	Cisplatin	D002945	15663-27-1	RAD23B	5887	Homo sapiens	9606	RAD23B mutant form inhibits the reaction [Cisplatin results in increased expression of CDKN1A protein]	decreases^reaction|increases^expression	21742020
cisplatin	Cisplatin	D002945	15663-27-1	RAD23B	5887	Homo sapiens	9606	RAD23B mutant form inhibits the reaction [Cisplatin results in increased expression of TP53 protein]	decreases^reaction|increases^expression	21742020
cisplatin	Cisplatin	D002945	15663-27-1	RAD23B	5887	Homo sapiens	9606	RAD23B mutant form inhibits the reaction [Cisplatin results in increased expression of XPC protein]	decreases^reaction|increases^expression	21742020
cisplatin	Cisplatin	D002945	15663-27-1	RAD23B	5887	Homo sapiens	9606	RAD23B results in decreased susceptibility to Cisplatin	decreases^response to substance	21742020
cisplatin	Cisplatin	D002945	15663-27-1	RAD23B	5887	Homo sapiens	9606	RAD23B results in increased susceptibility to Cisplatin	increases^response to substance	21878529
cisplatin	Cisplatin	D002945	15663-27-1	RAD23B	5887	Homo sapiens	9606	U 0126 inhibits the reaction [Cisplatin results in increased expression of RAD23B protein]	decreases^reaction|increases^expression	21742020
cisplatin	Cisplatin	D002945	15663-27-1	RAD23B	5887	Homo sapiens	9606	wortmannin inhibits the reaction [Cisplatin results in increased expression of RAD23B protein]	decreases^reaction|increases^expression	21742020
cisplatin	Cisplatin	D002945	15663-27-1	RAD50	10111	Homo sapiens	9606	Cisplatin promotes the reaction [Piroxicam results in decreased expression of RAD50 mRNA]	decreases^expression|increases^reaction	21858171
cisplatin	Cisplatin	D002945	15663-27-1	RAF1	5894	Homo sapiens	9606	RAF1 results in decreased susceptibility to Cisplatin	decreases^response to substance	21849418
cisplatin	Cisplatin	D002945	15663-27-1	RAGE	428910	Homo sapiens	9606	Cisplatin results in decreased expression of RAGE mRNA	decreases^expression	19561079
cisplatin	Cisplatin	D002945	15663-27-1	RAI14	26064	Homo sapiens	9606	Cisplatin results in decreased expression of RAI14 mRNA	decreases^expression	19561079
cisplatin	Cisplatin	D002945	15663-27-1	RALB	5899	Homo sapiens	9606	RALB protein results in decreased susceptibility to Cisplatin	decreases^response to substance	16734730
cisplatin	Cisplatin	D002945	15663-27-1	RANBP2	5903	Homo sapiens	9606	[Piroxicam co-treated with Cisplatin] results in decreased expression of RANBP2 mRNA	affects^cotreatment|decreases^expression	21858171
cisplatin	Cisplatin	D002945	15663-27-1	RAPGEF3	10411	Homo sapiens	9606	RAPGEF3 affects the reaction [8-(4-chloro-phenylthio)-2'-O-methyladenosine-3'-5'-cyclic monophosphate inhibits the reaction [Cisplatin results in increased cleavage of and results in increased activity of CASP3 protein]]	affects^reaction|decreases^reaction|increases^activity|increases^cleavage	21745194
cisplatin	Cisplatin	D002945	15663-27-1	RASA3	22821	Homo sapiens	9606	Cisplatin results in decreased expression of RASA3 mRNA	decreases^expression	19561079
cisplatin	Cisplatin	D002945	15663-27-1	RASSF1	11186	Homo sapiens	9606	ABT-737 promotes the reaction [RASSF1 results in increased susceptibility to Cisplatin]	increases^reaction|increases^response to substance	21880625
cisplatin	Cisplatin	D002945	15663-27-1	RASSF1	11186	Homo sapiens	9606	[Cisplatin co-treated with panobinostat] affects the expression of RASSF1 mRNA	affects^cotreatment|affects^expression	21791302
cisplatin	Cisplatin	D002945	15663-27-1	RASSF1	11186	Homo sapiens	9606	RASSF1 protein results in increased susceptibility to Cisplatin	increases^response to substance	17444856
cisplatin	Cisplatin	D002945	15663-27-1	RASSF1	11186	Homo sapiens	9606	RASSF1 results in increased susceptibility to Cisplatin	increases^response to substance	21880625
cisplatin	Cisplatin	D002945	15663-27-1	RB1	5925	Homo sapiens	9606	RB1 protein affects the susceptibility to Cisplatin	affects^response to substance	14704340|17640669
cisplatin	Cisplatin	D002945	15663-27-1	RBCK1	10616	Homo sapiens	9606	RBCK1 protein affects the susceptibility to Cisplatin	affects^response to substance	16217747
cisplatin	Cisplatin	D002945	15663-27-1	RBM18	92400	Homo sapiens	9606	Cisplatin results in increased expression of RBM18 mRNA	increases^expression	19561079
cisplatin	Cisplatin	D002945	15663-27-1	RBM25	58517	Homo sapiens	9606	Cisplatin affects the reaction [Piroxicam results in decreased expression of RBM25 mRNA]	affects^reaction|decreases^expression	21858171
cisplatin	Cisplatin	D002945	15663-27-1	RBM3	5935	Homo sapiens	9606	RBM3 results in increased susceptibility to Cisplatin	increases^response to substance	21804916
cisplatin	Cisplatin	D002945	15663-27-1	RBM38	55544	Homo sapiens	9606	Cisplatin results in increased expression of RBM38 mRNA	increases^expression	19561079
[truncated: 2,325 more rows]
