# Supplementary material for: Integrated Analysis of Gene Expression Profiles Associated with Response of Platinum/Paclitaxel-Based Treatment in Epithelial Ovarian Cancer
Source: PLoS One. 2012 Dec 27;7(12):e52745. doi: 10.1371/journal.pone.0052745 (PMC3531383; doi:10.1371/journal.pone.0052745)
Supplement: Table S9 — Signature genes from 4 previous publications which were listed in Table 2 . (XLSX) [file pone.0052745.s009.xlsx]

## Sheet: Table S9
Table S9. Signature genes from 4 previous publications which were listed in Table 2
Helleman et al, 2006	Ju et al, 2009	Jazaeri et al, 2005	Dressman et al, 2007
CEBPB	CYP2F1	KIAA1221	ACY1
CSRP2BP	GABBR2	COL6A1	ADSL
DDX18	GABRP	ERBB3	ADSS
DKFZP586L0724	GLDC	TPR	AFG3L2
GGH	IGLC2	EML4	AIFM1
HCFC1	INHB	GTPBP4	AIP
HMGB3	LOX	ZNF148	AKAP1
INPP5A	POSTN	KIAA0779	AKR1A1
SENP6	LRRC48	USP1	ARF3
ADP-GK	SFRP1	NEUROD2	ATF7IP
ALOX5	LOC92482	TOP2A	ATRX
AP1G1	CDC20	RHPN2	BMPR1A
ASS	215176_x_at†	KIAA4146	C6orf106
ATRN	216813_at†	LOC389677	C6orf108
B4GALT1	ANP32E	C6orf107	CARHSP1
BASP1	AP4S1	BCL2L11	CLU
BTBD7	APOA1	PAPD1	40608
C2orf29	BCAT1	ZNF71	40793
CAD	CAMTA1	PSME4	40795
CALR	CCNA2	CUGBP1	AACS
CBFB	CDCA8	PRKCI	ABCC1
CCNG2	CENPE	ANKRD27	ABCF2
CD59	COL11A1	MSH2	ABHD10
CDC42EP4	COMP	NCOA6	ABHD11
COL3A1	CRABP1	NBS1	ACACA
COL5A2	CRABP2	IGSF4	ACIN1
CRH	DGAT1	SOX12	ACTG1
DYSF	DYRK2	SOS1	ACTR1A
ERO1L	EZH2	CBX3	ACTR1B
FLJ12874	HLA-QA16A	RBBP8	ACVR1B
FLJ25952	IFI16	C19orf13	ACVR2A
FLJ34922	IGH	HRASLS	ADAR
FN1	IGHA1	CTSD	ADD1
HDAC2	IGKC	AFTIPHILIN	ADK
HIF1A	IGL	CNAP1	AGPAT1
Hs.104806	KNTC2	SFRS3	AGRN
Hs.502696	LOC96610	RNPC2	AHCY
Hs.99376	MAFB	PPFIA3	AHCYL1
ITGAE	MAP2K	ZDHHC9	AHSA1
KPNA2	MKI67	SEMA3A	AIF1
LBR	RNF125	PRKR	AK1
LDHA	S100A9	PCF11	AK2
LOC151579	SCD	Hs.128959	AKAP11
MGC57820	SLC22A1	KIAA0494	AKAP13
MLSTD2	STXBP6	MKRN1	AKAP8
MYO1B	TACC3	STK38	AKR1C1
PC4	TOP2A	GUCY1B3	ALCAM
PCNA	WHSC1	FADS2	ALDH18A1
PMSCL2	MUC5B	DD5	ALDH3A2
PPP2CA	CRISP3	ITPR2	ALG6
PRG4	DLK1	SEP1	ANAPC5
PTPN11	FOXD1	C20orf6	ANKRD27
RIF1	SOSTDC1	p66a	ANXA7
SDHB	CGI-38	WBP4	AP1M2
SFRS11	ALDH1A2	UBE4B	AP2A2
SGPP1	CRISP2	FLJ41501	AP2B1
SLC43A3	OR7E47P	CIP98	AP2S1
SR140	FLJ23049	TREML1	AP3S1
STIM2	MAD1L1	RUVBL2	AP3S2
STK6	CITED2	LOC149018	APEH
SUZ12	NRXN3	PCDH16	APOE
TEAD3	DLEC1	CGI-116	ARF5
TOP2A	SNX1	Hs.120332	ARF6
UBA2	RNASE4	MSCP	ARHGAP1
UBE2C	SAA1	ZNF145	ARHGDIA
WTAP	EFHC1	CHI3L2	ARHGEF18
ZNF43	PAX2	PROK1	ARHGEF2
ZNF74	DNAI2	RPS15	ARID1A
	SYNE1	P2RY5	ARID5B
	CDV1	EFEMP2	ARL2BP
	ALPP	SRI	ARL4C
	GJA4	SCAM-1	ARL6IP1
	AGR2	TM4SF7	ARL6IP5
	CCDC19	PMM1	ARL8B
	PLK2	GYPC	ARMCX2
	ALDH3B1	C4A	ARPC5
	NPDC1	NBL1	ASAP1
	DUSP4	RARRES2	ASF1B
	NUDT4	MMP2	ASNA1
	MAPKKK	Hs.526933	ASNS
	HLA-DRB4	AEBP1	ASXL2
	TFF3		ATF5
	LRRC50		ATG3
	DNALI1		ATP1B1
	ALDH1A1		ATP2B4
	STAR		ATP5A1
	ARL4		ATP5B
	TP53AP1		ATP5G2
	CSPP1		ATP5I
	SLC38A4		ATP6AP1
	DIRAS3		ATP6V0C
	FOXA2		ATPIF1
	C6orf97		ATXN2
	CTAGE5		ATXN7L3B
	PEMT		AUTS2
	ZMYND10		AVPI1
			BAD
			BAG3
			BANP
			BAT2
			BAT2L2
			BAZ1B
			BAZ2B
			BBX
			BCL11A
			BCL6
			BCL7C
			BCLAF1
			BEX4
			BHLHE41
			BICD1
			BIRC2
			BMS1
			BNIP3L
			BRD2
			BST2
			BTBD1
			BTG1
			BTG3
			BUB3
			BYSL
			BZW2
			C11orf10
			C11orf2
			C11orf48
			C12orf35
			C12orf44
			C14orf166
			C14orf2
			C17orf63
			C19orf10
			C19orf21
			C19orf42
			C19orf53
			C19orf56
			C19orf62
			C1orf106
			C1orf123
			C1orf144
			C1orf27
			C1orf63
			C20orf103
			C20orf11
			C20orf24
			C22orf9
			C3
			C4orf27
			C5orf13
			C6orf134
			C6orf62
			CA12
			CALM1
			CALR
			CAMK2G
			CAMLG
			CAND1
			CAPRIN2
			CARS
			CAST
			CBARA1
			CBLB
			CBX1
			CBX6
			CCDC51
			CCDC72
			CCHCR1
			CCNA1
			CCNC
			CCND1
			CCNF
			CCNI
			CCS
			CCT5
			CCT6A
			CD14
			CD163
			CD164
			CD200
			CD248
			CD99
			CDC20
			CDC25B
			CDC37
			CDC42BPA
			CDC42BPB
			CDH1
			CDIPT
			CDK13
			CDK19
			CDK2
			CDK20
			CDK4
			CDK5RAP3
			CDS2
			CEP57
			CES2
			CETN2
			CGGBP1
			CHD4
			CHERP
			CHMP1B
			CHMP2B
			CHMP4A
			CHP
			CHST3
			CIRBP
			CIZ1
			CKS1B
			CKS2
			CLDN3
			CLDN4
			CLNS1A
			CLP1
			CLSTN1
			CLTB
			CLTC
			CLUAP1
			CNOT1
			CNOT2
			CNOT4
			CNPY2
			CNPY3
			COBRA1
			COG2
			COL1A1
			COL3A1
			COL4A1
			COL4A2
			COL5A2
			COL6A1
			COL6A2
			COL6A3
			COL7A1
			COMMD4
			COMMD9
			COPB2
			COPG
			COPS6
			COPS7A
			COX17
			COX6A1
			COX7A2
			COX7A2L
			COX7B
			CPD
			CREBBP
			CREBL2
			CRK
			CRTC1
			CS
			CSDA
			CSE1L
			CSF1R
			CSNK2B
			CST3
			CTBP1
			CTBP2
			CTCF
			CTPS
			CTSF
			CTSK
			CUL4B
			CUL7
			CUTA
			CUX1
			CXorf40A
			CYB5A
			CYB5R1
			CYBA
			CYC1
			CYFIP2
			DAG1
			DALRD3
			DAP
			DARS
			DAXX
			DCAF15
			DCP1A
			DCTN1
			DDAH2
			DDIT4
			DDR1
			DDX21
			DDX23
			DDX41
			DDX54
			DGCR14
			DGKA
			DGUOK
			DHCR24
			DHCR7
			DHRS3
			DHX15
			DHX16
			DHX30
			DICER1
			DKC1
			DKFZP586I1420
			DLG1
			DLG3
			DLGAP4
			DNAH3
			DNAJA3
			DNAJB1
			DNAJB12
			DNAJB9
			DNAJC11
			DNAJC7
			DNASE2
			DNM1L
			DOCK1
			DOK5
			DPYSL3
			DR1
			DRP2
			DUSP11
			DYNLRB1
			DYRK4
			EAPP
			EBP
			ECE1
			ECHDC2
			EDEM1
			EEF1A1
			EIF1AX
			EIF1B
			EIF2AK2
			EIF2S2
			EIF3K
			EIF4E2
			EIF4G1
			EIF5
			ELAVL1
			ELF4
			ELK1
			ELOVL1
			EMD
			EML2
			EMX2
			ENC1
			ENOSF1
			ENSA
			EPAS1
			EPB41L2
			EPHA1
			ESD
			ESR1
			ESRP1
			ETF1
			ETHE1
			EXOC3
			EXOC7
			EXTL2
			EYA2
			EZH1
			EZR
			F11R
			FAF1
			FAF2
			FAHD2A
			FAM111A
			FAM127A
			FAM127B
			FAM160B2
			FAM168B
			FAM32A
			FAM53B
			FAM60A
			FAM89B
			FARSA
			FASTK
			FBL
			FBXL14
			FBXL5
			FBXO21
			FBXO7
			FCER1G
			FCGBP
			FCGRT
			FEZ2
			FGFR1
			FKBP11
			FKBP2
			FKBP3
			FKBP4
			FKSG49
			FLNA
			FLNB
			FLOT2
			FMR1
			FN1
			FN3KRP
			FNBP1
			FNBP4
			FNDC3B
			FOLR1
			FOSL2
			FOXM1
			FOXO1
			FOXO3
			FSTL1
			FTH1
			FTHL5
			FTL
			FTSJ3
			FUBP1
			FURIN
			FUT8
			FXR1
			FXYD3
			FZD4
			FZD6
			G3BP2
			GABBR1
			GALNT1
			GAPDH
			GAS1
			GBF1
			GBP1
			GBP2
			GDE1
			GDPD5
			GGA3
			GHITM
			GIT1
			GJA1
			GJB1
			GLA
			GLRX5
			GLT25D1
			GLT8D1
			GLYR1
			GMFB
			GMPR
			GMPR2
			GNAI2
			GNAI3
			GNAS
			GNG5
			GOLGA1
			GOLGB1
			GOLPH3L
			GORASP1
			GORASP2
			GPATCH8
			GPBP1L1
			GPD1L
			GPR125
			GPR172A
			GPRC5B
			GPX1
			GPX4
			GRHPR
			GRPEL1
			GSPT1
			GSTA4
			GTF3C1
			GTF3C2
			GTPBP6
			GTPBP8
			GTSE1
			H2AFV
			H3F3B
			HADH
			HARS
			HARS2
			HAUS4
			HBB
			HEXB
			HGSNAT
			HINT1
			HIST3H2A
			HK2
			HLA-DQB1
			HLA-DRB6
			HMBOX1
			HMGB1
			HMGB3
			HMGXB4
			HMOX1
			HN1L
			HNRNPA0
			HNRNPA1
			HNRNPA2B1
			HNRNPA3
			HNRNPC
			HNRNPF
			HNRNPH3
			HNRNPK
			HNRNPU
			HNRPDL
			HOOK2
			HOXB7
			HOXD4
			HPN
			HPRT1
			HSBP1
			HSD17B8
			HSPA12A
			HSPB11
			ID2
			ID4
			IDE
			IDH1
			IDH3G
			IDS
			IFI16
			IFI27
			IFI44
			IFI44L
			IFI6
			IFIT1
			IFITM1
			IFNGR1
			IFNGR2
			IFT20
			IGBP1
			IGFBP3
			IKBKB
			IL1R1
			ILF3
			IMMT
			IMPDH1
			IMPDH2
			INO80B
			INTS8
			IP6K1
			IPO13
			IPO5
			IQCB1
			IQGAP1
			IRAK1
			ISG15
			ISG20L2
			ITGA3
			ITGA5
			ITGA7
			ITGAE
			ITM2C
			ITSN1
			JAK1
			JARID2
			JRK
			JTB
			KAT5
			KBTBD2
			KCMF1
			KDELR3
			KDM2A
			KDM4A
			KDM5A
			KDM5B
			KEAP1
			KHNYN
			KIAA0100
			KIAA0182
			KIAA0284
			KIAA0391
			KIAA0494
			KIAA0664
			KIAA0664L3
			KIAA0907
			KIF20A
			KIF5B
			KIF5C
			KIFC1
			KLHDC10
			KLHDC3
			KLHL9
			KLK10
			KLK11
			KLK7
			KPNA1
			KPNA2
			KPNA6
			KPNB1
			KRAS
			KRT17
			KTELC1
			LAGE3
			LAMP2
			LARP1
			LARP4
			LBR
			LCMT1
			LDB1
			LDOC1
			LGALS3BP
			LGMN
			LGTN
			LIMK2
			LMO4
			LOC100272216
			LOC440434
			LOC91316
			LOXL2
			LPIN2
			LRFN4
			LRIG1
			LRIG2
			LRP6
			LRRC41
			LRRC47
			LRRC8D
			LSM14A
			LSM2
			LSM4
			LSM5
			LSR
			LST1
			LUC7L3
			LY6E
			LYN
			LYPLA1
			LYPLA2
			LYPLA2P1
			M6PR
			MAEA
			MAFB
			MAFG
			MAGED2
			MAOB
			MAP1LC3B
			MAP2K3
			MAP3K3
			MAP4
			MAPK1IP1L
			MAPK6
			MARCKS
			MARCKSL1
			MAT2A
			MBD1
			MBD4
			MBOAT2
			MCAM
			MCCC1
			MCOLN1
			MCRS1
			MCTS1
			ME2
			MEA1
			MEAF6
			MECOM
			MECP2
			MED12
			MED21
			MED24
			MEST
			METAP2
			METTL9
			MFN1
			MGRN1
			MGST3
			MID1IP1
			MINK1
			MKRN1
			MLF1
			MLH1
			MLX
			MMADHC
			MMP14
			MNT
			MOBKL1B
			MORF4L2
			MOSC1
			MPDU1
			MRFAP1L1
			MRPL11
			MRPL15
			MRPL24
			MRPL28
			MRPL9
			MRPS12
			MRPS18A
			MRPS27
			MRPS34
			MSH6
			MSL2
			MSL3
			MSLN
			MSRB2
			MST1
			MTA1
			MTCP1NB
			MTDH
			MTF2
			MTG1
			MTHFD2
			MTMR1
			MTMR4
			MTMR9
			MX1
			MXD4
			MXRA7
			MXRA8
			MYC
			MYH11
			MYH14
			MYL12A
			MYL12B
			MYLIP
			MZT2A
			MZT2B
			NAA40
			NAA50
			NAB2
			NACA
			NADK
			NAP1L1
			NAPA
			NAT10
			NCOA1
			NCOA4
			NDEL1
			NDRG1
			NDRG2
			NDRG3
			NDUFA1
			NDUFAB1
			NDUFAF3
			NDUFB4
			NDUFS7
			NDUFS8
			NDUFV1
			NEDD8
			NEK9
			NET1
			NEU1
			NFATC2IP
			NFE2L1
			NFYB
			NGFRAP1
			NGLY1
			NINJ1
			NIPSNAP1
			NISCH
			NIT2
			NKTR
			NME1
			NONO
			NOP10
			NOP14
			NOP2
			NOP56
			NOTCH2
			NOTCH3
			NPEPPS
			NPM3
			NPR1
			NPRL2
			NR1H3
			NR2F6
			NRD1
			NRIP1
			NSF
			NSFL1C
			NT5DC2
			NUDCD3
			NUDT3
			NUDT9
			NUP214
			NUP54
			NUP62
			NUP93
			OAS1
			OAT
			OBSL1
			ODC1
			OFD1
			OGT
			OPHN1
			ORAI3
			ORC4L
			OSBP
			OSBPL2
			OSBPL8
			OSBPL9
			OXA1L
			OXSR1
			P4HA2
			PABPC1
			PABPC3
			PABPN1
			PAK2
			PAM
			PAPD7
			PARD3
			PARN
			PARP6
			PARVA
			PBX1
			PBXIP1
			PCBP1
			PCBP2
			PCBP4
			PCCB
			PCIF1
			PCMT1
			PCNP
			PCOLCE
			PDAP1
			PDCD10
			PDCD4
			PDCD6
			PDE4C
			PDIA5
			PDIA6
			PDS5A
			PDXDC1
			PEBP1
			PEG10
			PER1
			PERP
			PES1
			PEX10
			PEX19
			PEX5
			PFDN6
			PGAP2
			PGK1
			PGLS
			PGM1
			PGRMC1
			PHB
			PHC1
			PHF15
			PHF17
			PHIP
			PIGF
			PIK3C2B
			PIK3R3
			PIM1
			PINK1
			PIP4K2C
			PITPNA
			PITPNB
			PITRM1
			PJA1
			PKM2
			PKN2
			PKP3
			PKP4
			PLA2G6
			PLCXD1
			PLEKHO2
			PLOD2
			PLXND1
			PMPCA
			PMS2L1
			PMS2L11
			PMS2L3
			PMVK
			PNN
			PNO1
			PNP
			PNRC1
			POGK
			POLD2
			POLR1C
			POLR2B
			PPAP2B
			PPIA
			PPIL2
			PPM1B
			PPM1F
			PPP1CB
			PPP1CC
			PPP1R10
			PPP1R11
			PPP1R15A
			PPP1R8
			PPP2R3A
			PPP2R4
			PPP2R5A
			PPP3CB
			PQBP1
			PRC1
			PRCP
			PRDX6
			PRELP
			PREP
			PREPL
			PRKAR1A
			PRKCI
			PRKCSH
			PRPF40A
			PRPH
			PRPS1
			PRPSAP1
			PRR14
			PRSS23
			PRUNE
			PSENEN
			PSIP1
			PSMA6
			PSMB3
			PSMB5
			PSMB7
			PSMC3
			PSMC5
			PSMD10
			PSMD14
			PSMD5
			PSMD8
			PTBP1
			PTDSS1
			PTEN
			PTGES3
			PTK7
			PTMA
			PTOV1
			PTP4A2
			PTPN12
			PTRH2
			PTTG1
			PUM1
			PVRL2
			PWP1
			PXDN
			PXMP4
			PXN
			QTRT1
			R3HCC1
			R3HDM1
			RAB14
			RAB15
			RAB2A
			RAB31
			RAB5B
			RAB5C
			RAB8A
			RAB9A
			RABGGTB
			RAC1
			RAD23A
			RAD54L2
			RAF1
			RAG1AP1
			RAI14
			RAI2
			RALB
			RAMP1
			RANBP2
			RAP2A
			RAP2B
			RARG
			RARRES3
			RBBP4
			RBBP8
			RBCK1
			RBM22
			RBM23
			RBM38
			RBM39
			RBM4
			RBM5
			RBM6
			RBMX
			RCL1
			RDBP
			REC8
			RECK
			RER1
			RERE
			RGL1
			RGL2
			RHOD
			RHOF
			RING1
			RIOK3
			RMND5A
			RMND5B
			RNASE1
			RNF103
			RNF11
			RNF130
			RNF139
			RNF187
			RNF19B
			RNF24
			RNF4
			RNPS1
			ROCK1
			ROGDI
			RPA3
			RPF1
			RPL10
			RPL13A
			RPL15
			RPL22
			RPL23
			RPL26L1
			RPL28
			RPL29
			RPL3
			RPL31
			RPL36A
			RPL4
			RPL7
			RPS12
			RPS16
			RPS17
			RPS2
			RPS21
			RPS27
			RPS29
			RPS4X
			RPS9
			RPSA
			RQCD1
			RRAGA
			RRAS
			RRM2
			RSAD1
			RSL1D1
			RSL24D1
			S100A1
			S100A2
			S100A6
			SAFB
			SAP130
			SART3
			SCAP
			SCARA3
			SCCPDH
			SCGB2A1
			SCNN1A
			SCP2
			SCRN1
			SDAD1
			SDHAP1
			SDR39U1
			SEC11A
			SEC24C
			SEC63
			SECTM1
			SEMA3B
			SEMA4C
			SEMA4D
			SENP6
			SEPP1
			SERBP1
			SERF2
			SERINC3
			SERP1
			SET
			SETD1B
			SETD3
			SETX
			SF3A1
			SF3B5
			SFPQ
			SFRS12
			SFRS17A
			SFRS18
			SFTPB
			SGPL1
			SGTA
			SH3BGRL
			SH3BP5
			SH3GLB1
			SIAH2
			SIN3B
			SIRT2
			SKIV2L
			SKP1
			SLBP
			SLC10A3
			SLC22A5
			SLC25A16
			SLC25A24
			SLC25A28
			SLC25A36
			SLC25A38
			SLC25A5
			SLC25A6
			SLC30A1
			SLC35A2
			SLC35E1
			SLC38A2
			SLC43A3
			SLC7A5
			SLC7A8
			SLC9A6
			SLPI
			SMAP1
			SMARCA4
			SMARCC1
			SMARCD3
			SMARCE1
			SMC4
			SMG7
			SMYD3
			SND1
			SNF8
			SNRNP40
			SNRPC
			SNRPD2
			SNRPE
			SNRPG
			SNX3
			SNX4
			SNX6
			SOCS5
			SON
			SORD
			SORL1
			SOX17
			SP110
			SPARC
			SPATA20
			SPCS1
			SPG21
			SPINT2
			SPON1
			SPOP
			SPRY4
			SPSB3
			SPTLC1
			SR140
			SRD5A1
			SRP54
			SRPK2
			SRPRB
			SRRM2
			SRSF1
			SRSF11
			SRSF2
			SRSF2IP
			SRSF4
			SS18L1
			SS18L2
			SSBP3
			SSFA2
			SSH1
			SSPN
			SSR1
			SSR2
			SSR4
			ST13
			ST7
			STAG2
			STAMBP
			STAT1
			STAT3
			STAT6
			STAU1
			STK24
			STK38L
			STRA6
			STRADA
			STRAP
			STX3
			STX7
			STXBP2
			SUB1
			SUGP2
			SULT1A2
			SUPT4H1
			SUPV3L1
			SUZ12
			SVIL
			SYNCRIP
			TAB2
			TACC3
			TAF6
			TAF9
			TARBP2
			TARS
			TAX1BP1
			TBC1D9B
			TBCA
			TBCB
			TBL3
			TCF12
			TCF3
			TCF7L2
			TCP1
			TCTA
			TCTN2
			TCTN3
			TEAD4
			TECR
			TES
			TET3
			TEX10
			TFAP2C
			TFEB
			TFG
			TGFB1I1
			TGIF1
			TGIF2
			TH1L
			THADA
			THAP4
			TIAL1
			TIMELESS
			TIMM17A
			TIMM8B
			TIMP1
			TIPARP
			TKT
			TLE2
			TLK2
			TM9SF2
			TM9SF3
			TMBIM4
			TMCO1
			TMED10
			TMED5
			TMEM131
			TMEM132A
			TMEM147
			TMEM164
			TMEM165
			TMEM168
			TMEM59
			TMEM9B
			TMPRSS4
			TMX4
			TNFAIP1
			TNFRSF1A
			TNFRSF25
			TNFSF10
			TNIP2
			TNPO1
			TNPO2
			TNPO3
			TOMM34
			TOMM70A
			TOP2B
			TOPBP1
			TP53I3
			TPD52
			TPD52L2
			TPM4
			TPP2
			TPRKB
			TPX2
			TRA2A
			TRA2B
			TRIAP1
			TRIB1
			TRIM14
			TRIM22
			TRIM26
			TRIM32
			TRIM33
			TRIM37
			TRIM44
			TRIOBP
			TRIP12
			TRIP13
			TRIP6
			TROAP
			TSC1
			TSC2
			TSC22D3
			TSC22D4
			TSEN34
			TSKU
			TSN
			TSPAN3
			TSPAN31
			TSPAN6
			TSPYL1
			TSPYL2
			TSPYL4
			TSR2
			TSSC1
			TST
			TTC1
			TTC15
			TTC17
			TTC19
			TTC31
			TUBA1C
			TUBA4A
			TUBGCP2
			TUG1
			TULP3
			TUSC2
			TXNL1
			TXNL4A
			TYK2
			TYW1
			U2AF1
			U2AF2
			UBB
			UBE2D2
			UBE2H
			UBE2S
			UBE3B
			UBP1
			UBXN7
			UCKL1
			UCP2
			UFM1
			UGP2
			UGT2B28
			UMPS
			UNC5B
			UPF1
			UPF3B
			UQCR10
			UQCRC2
			UQCRFS1
			UQCRQ
			URGCP
			USP1
			USP14
			USP33
			USP39
			USP4
			USP7
			UTP18
			UTP6
			UXT
			VAMP3
			VAMP8
			VAT1
			VBP1
			VCAN
			VDAC3
			VEZF1
			VGLL4
			VPS28
			VWA1
			WAC
			WBP11
			WBP2
			WBP5
			WDR1
			WDR13
			WDR48
			WDR6
			WDR82
			WFS1
			WHSC1
			WHSC2
			WIZ
			WNK1
			WNT10B
			WT1
			WT1AS
			WWC1
			WWC3
			XAF1
			XBP1
			XPO6
			YARS
			YBX1
			YIF1A
			YIPF6
			YME1L1
			YPEL5
			YTHDF1
			YTHDF2
			YWHAB
			YWHAH
			YWHAQ
			ZBED1
			ZBTB5
			ZC3HAV1
			ZCCHC11
			ZDHHC6
			ZFAND6
			ZFC3H1
			ZMIZ2
			ZMPSTE24
			ZMYM4
			ZMYND11
			ZMYND8
			ZNF185
			ZNF22
			ZNF24
			ZNF292
			ZNF324
			ZNF446
			ZNF532
			ZNF544
			ZNF574
			ZNF580
			ZNF721
			ZSCAN18
			ZWINT
			ZXDC
			ZZZ3
